# Supplementary material for: The bacterial strains JAM1T and GP59 of the species Methylophaga nitratireducenticrescens differ in their expression profiles of denitrification genes in oxic and anoxic cultures
Source: PubMed Central journal article supplement (PMC11526790; doi:10.7717/peerj.18361), 2024-10-28

GP59 «AN» | JAM1<sup>T</sup> «AN»

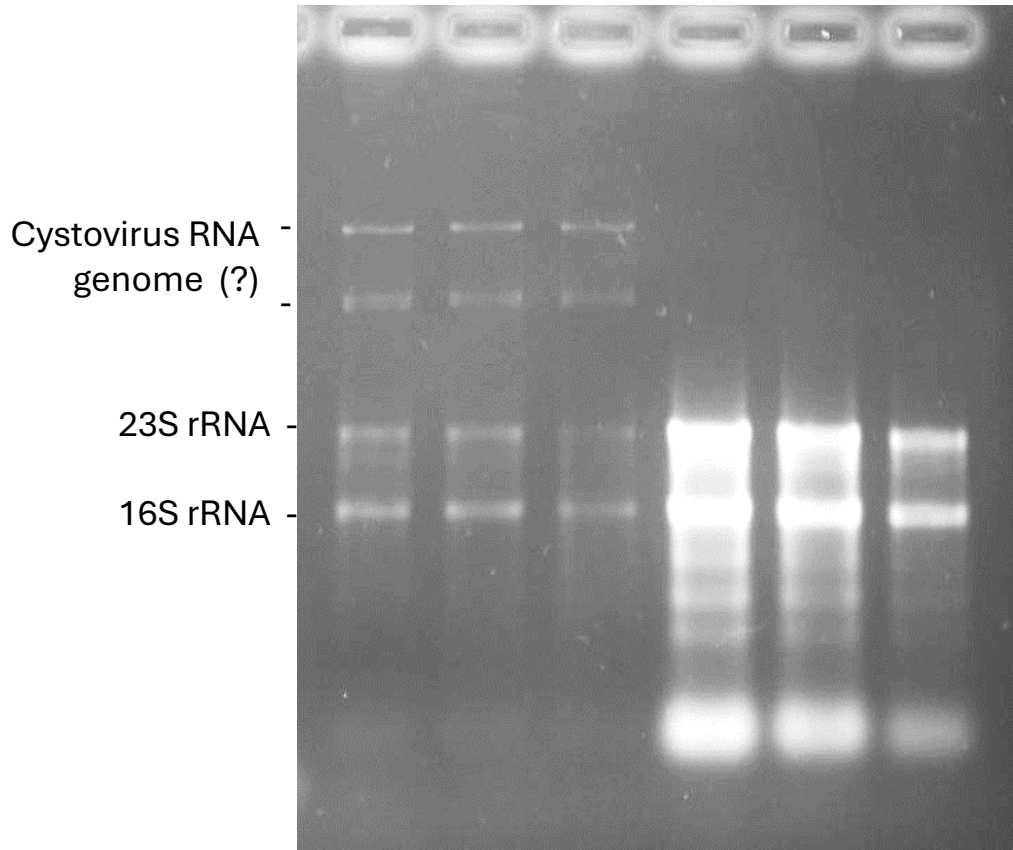

Supplement: peerj-12-18361-s001.pdf [file peerj-12-18361-s001.pdf]
