# Supplementary material for: The bacterial strains JAM1T and GP59 of the species Methylophaga nitratireducenticrescens differ in their expression profiles of denitrification genes in oxic and anoxic cultures
Source: PubMed Central journal article supplement (PMC11526790; doi:10.7717/peerj.18361), 2024-10-28

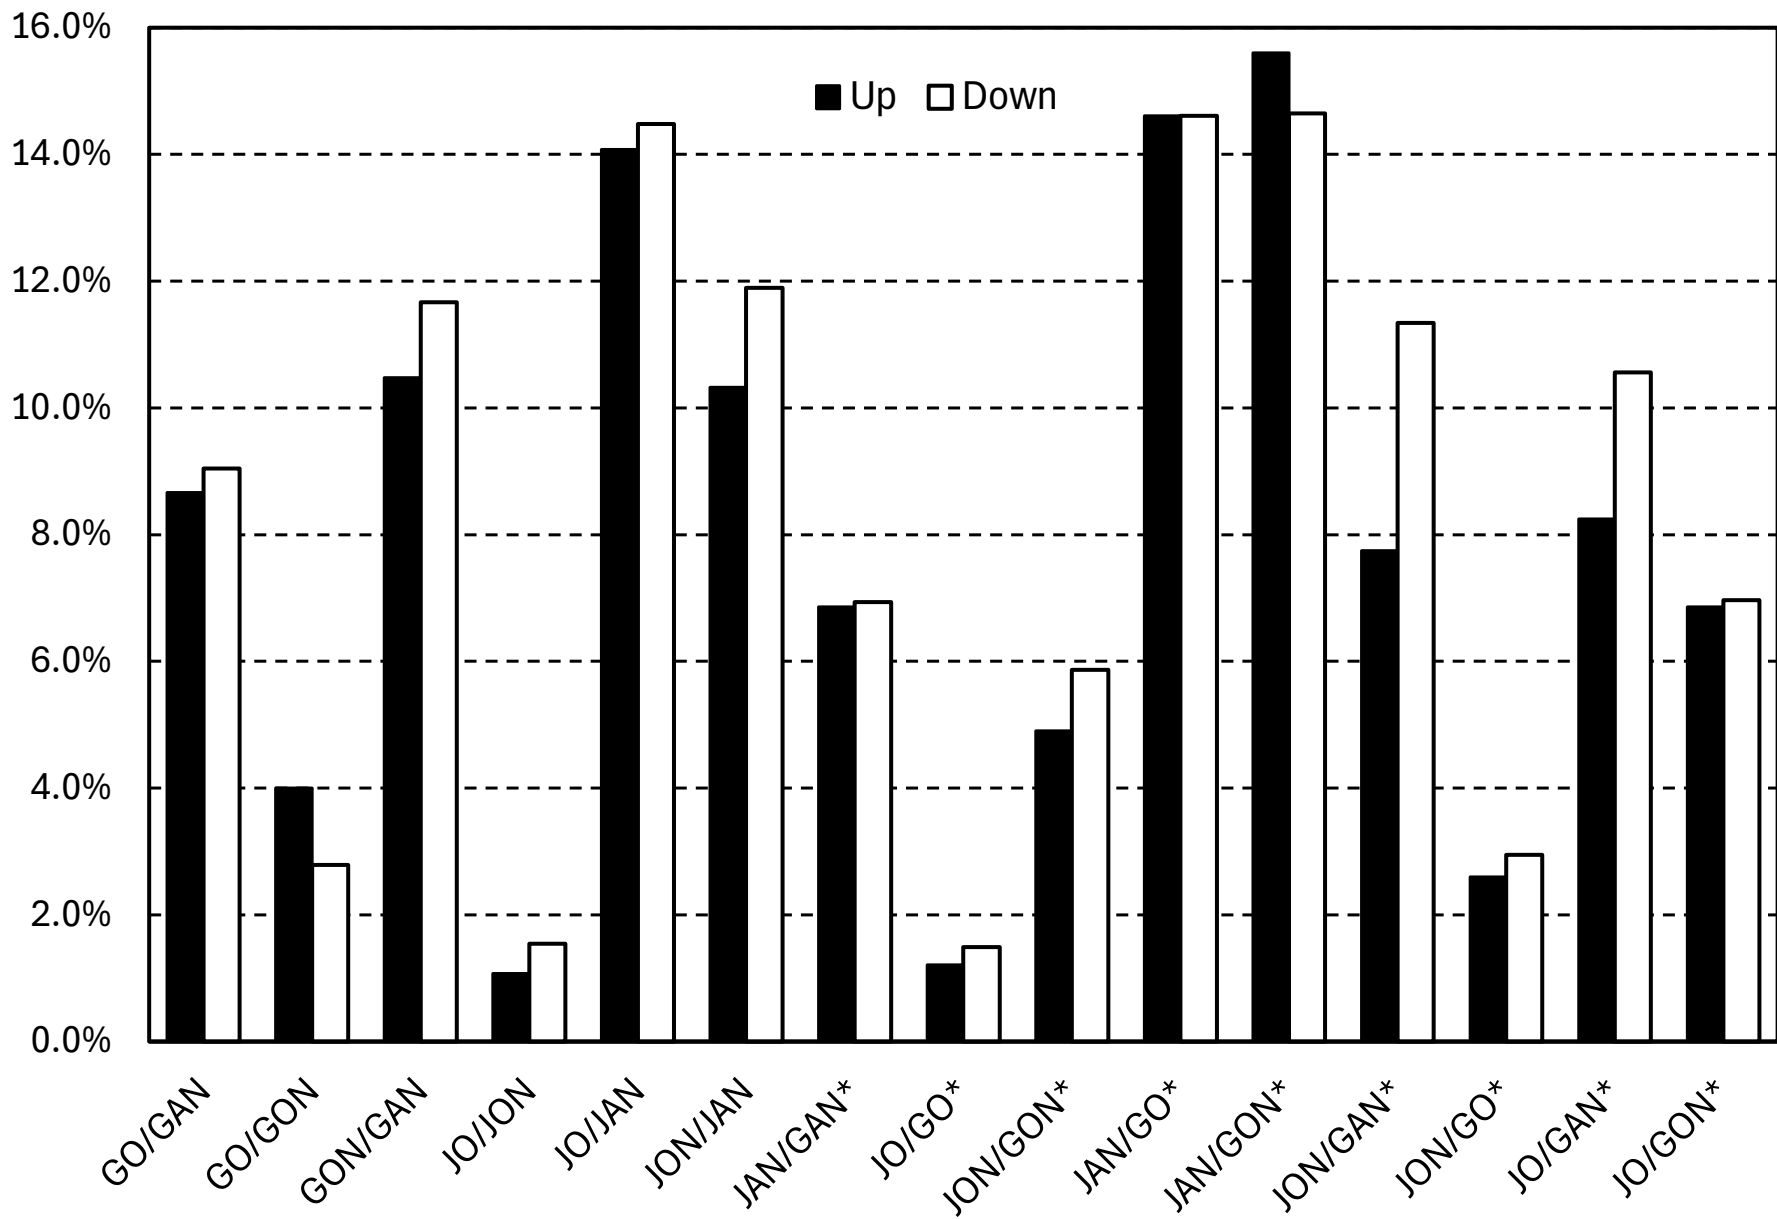

Supplement: peerj-12-18361-s006.pdf [file peerj-12-18361-s006.pdf]
