# Supplementary material for: The bacterial strains JAM1T and GP59 of the species Methylophaga nitratireducenticrescens differ in their expression profiles of denitrification genes in oxic and anoxic cultures
Source: PeerJ. 2024 Oct 28;12:e18361. doi: 10.7717/peerj.18361 (PMC11526790; doi:10.7717/peerj.18361)
Supplement: Supplemental Information 2 [file peerj-12-18361-s002.xlsx]

## Sheet: Instruction
	Figure 1 data
	All values are log10 of RT-qPCR in copies of the measured genes by 100 copies of the normalized genes (dnaG, rpoB, rpoD)
	O: «O» conditions
	ON: «ON» conditions
	AN: «AN» conditions
	Two way ANOVA were performed by GraphPad Prism v10.2.0

## Sheet: narG1
Low						High
JAM1	JAM1	JAM1	GP59	GP59	GP59	JAM1	JAM1	JAM1	GP59	GP59	GP59
O	ON	AN	O	ON	AN	O	ON	AN	O	ON	AN		Table Analyzed	narG1
1.36173	1.07918	2.60959	-0.20066	1.81291	3.11126	2.03743	1.25527	2.13354	1.65321	1.20412	1.93952
1.43136	1.60206	2.76641	-0.02228	1.68124	3.16465	2.07918	1.60206	2.37475	1.51851	1.53148	1.25527		Two-way ANOVA	Ordinary
1.64345	1.17609	2.83506	-0.05552	1.44716	3.37785	2.10037	1.87506	2.27646	1.81954	1.68124	1.38021		Alpha	0.05
1.43136	1.07918	2.61384	-0.22915	1.88081	3.07628	1.14613	2.02531	1.94448	2.27184	1.4624	1.88649
1.50515	1.5563	2.79379	-0.02228	1.716	3.20656	1.14613	2.03743	2.23553	1.64345	1.20412	2.0086		Source of Variation	% of total variation	P value	P value summary	Significant?
1.72428	1.20412	2.91009	-0.02687	1.44716	3.33726	1.38021	1.49136	2.11394	1.50515	1.5682	1.59106		Interaction	17.95	<0.0001	****	Yes
1.44716	1.07918	2.54033	-0.18709	1.77815	3.07298	2.08636	1.27875	2.35984	1.81954	1.72428	2.02531		Row Factor	2.9	<0.0001	****	Yes
1.43136	1.5563	2.75587	-0.05552	1.69897	3.15655	2.10721	1.62325	2.30535	2.29226	1.50515	1.32222		Column Factor	63.32	<0.0001	****	Yes
1.63347	1.17609	2.79169	-0.03621	1.27875	3.37181	2.18184	1.88649	2.10037	1.47712	1.25527	1.41497
1.51851	1.07918	2.54407	-0.20761	1.8451	3.03782	1.17609	2.04532	2.29885	1.49136	1.5563	1.90849		ANOVA table	SS (Type III)	DF	MS	F (DFn, DFd)	P value
1.50515	1.51851	2.78319	-0.05061	1.74036	3.19866	1.17609	2.08991	2.13033	1.91908	1.66276	2.03743		Interaction	51.46	5	10.29	F (5, 574) = 130.3	P<0.0001
1.70757	1.20412	2.86688	-0.01323	1.27875	3.33102	1.30103	1.34242	2.31387	2.21219	1.41497	1.54407		Row Factor	8.315	1	8.315	F (1, 574) = 105.2	P<0.0001
1.51851	1.17609	2.54531	-0.24413	1.82607	3.21192	1.99123	1.23045	2.16137	1.47712	1.25527	1.89763		Column Factor	181.5	5	36.3	F (5, 574) = 459.5	P<0.0001
1.5563	1.62325	2.90741	-0.00436	1.89209	3.46746	2.03743	1.66276	1.99123	1.47712	1.59106	1.14613		Residual	45.35	574	0.079
1.73239	1.25527	3.15045	-0.11351	1.54407	3.25624	1.91908	1.86923	2.25042	1.91381	1.69897	1.34242
1.50515	1.23045	2.64542	-0.23657	1.83251	3.27439	1.11394	2	2.11059	2.233	1.44716	1.85733		Difference between row means
1.66276	1.716	2.98722	-0.00877	1.83885	3.53453	1.07918	2.02531	2.29885	1.76343	1.32222	2.02938		Predicted (LS) mean of JAM1	2.049
1.69897	1.25527	3.19838	-0.13077	1.63347	3.2887	1.34242	1.54407	2.18752	1.50515	1.43136	1.49136		Predicted (LS) mean of GP59	1.797
1.60206	1.20412	2.47712	-0.22915	1.78533	3.17377	2.04139	1.25527	2.14613	1.64345	1.59106	1.98227		Difference between predicted means	0.2521
1.5682	1.57978	2.89653	-0.03621	1.91908	3.45939	2.06446	1.68124	2.31175	2.1038	1.5682	1.20412		SE of difference	0.02457
1.716	1.23045	3.10721	-0.09691	1.38021	3.25018	2.00432	1.88081	2.71517	1.95904	1.25527	1.39794		95% CI of difference	0.2038 to 0.3004
1.59106	1.25527	2.57634	-0.21467	1.79239	3.23629	1.14613	2.02119	2.32222	1.72428	1.73239	1.88081
1.6721	1.6721	2.97681	-0.03621	1.86332	3.52634	1.11394	2.07918	2.67025	1.49136	1.36173	2.0569		Data summary
1.6902	1.23045	3.15503	-0.11919	1.4624	3.28285	1.25527	1.38021	2.65514	1.65321	1.44716	1.43136		Number of columns (Column Factor)	6
1.62325	1.49136	3.25959	0.26717	2.25768		1.90309	1.38021	2.31806	2.0607	1.65321	1.92428		Number of rows (Row Factor)	2
1.79239	1.9345	3.5339	0.47857	2.06446		1.81291	1.90309	2.72016	1.93952	1.57978	1.6721		Number of values	586
1.89763	1.72428	3.67173	0.63749	1.77815		1.91908	1.86332	2.27184	1.59106	1.27875	1.83885
1.59106	1.54407	3.34242	0.2878	2.21748		1.07918	1.96848	2.64345	1.4624	1.73239	1.75587
1.94939	2.00432	3.55835	0.48996	2.07555		1.14613	2.03743	2.50515	1.74036	1.30103	1.96848
1.91908	1.76343	3.69443	0.58433	1.89209		1.41497	1.04139	2.42651	2.04532	1.47712	1.95904		Compare cell means regardless of rows and columns
1.716	1.49136	3.19005	0.28556	2.22272		1.87506	1.34242	2.71265	1.89209	1.62325	1.68124
1.79239	1.89209	3.52336	0.44871	2.08991		1.80618	1.86332	2.38739	1.5563	1.5563	1.81954		Number of families	1
1.88649	1.69897	3.62829	0.65321	1.60206		1.92428	1.88081	2.55388	1.4624	1.20412	1.716		Number of comparisons per family	66
1.68124	1.54407	3.273	0.30535	2.18184		1.11394	1.92942	2.7007	1.74819	1.81291	2.10721		Alpha	0.05
1.94939	1.95904	3.54777	0.45939	2.10037		1.17609	1.69897	2.33244	2	1.34242	1.88081
1.90309	1.74036	3.65099	0.60097	1.72428		1.38021	1.11394	2.71767	1.87506	1.49136	1.5682		Tukey's multiple comparisons test	Predicted (LS) mean diff.	95.00% CI of diff.	Below threshold?	Summary	Adjusted P Value
						1.86332	1.36173	2.33646	2.29447	1.6721	1.80618
						1.77085	1.95904	2.52634	2.22531	1.5563	1.77815		JAM1:O Low vs. JAM1:ON Low	0.1952	-0.02221 to 0.4126	No	ns	0.1277
						1.74036	1.85733	2.55145	2.32838	1.23045	1.85733		JAM1:O Low vs. JAM1:AN Low	-1.382	-1.599 to -1.165	Yes	****	<0.0001
						1.07918	1.94448	2.44091	2.81558	1.81291	1.91381		JAM1:O Low vs. JAM1:O-High	-0.1371	-0.3293 to 0.05506	No	ns	0.4484
						1.07918	2.02531	2.74351	2.81224	1.85126	1.5682		JAM1:O Low vs. JAM1:ON-High	-0.259	-0.4491 to -0.06888	Yes	***	0.0006
						1.36173	1.07918	2.75815	2.32428	2.0569	1.79239		JAM1:O Low vs. JAM1:AN-High	-0.7833	-0.9766 to -0.5900	Yes	****	<0.0001
						1.83251	1.34242	2.69285	2.22789	2.35218	1.74036		JAM1:O Low vs. GP59:O Low	1.573	1.356 to 1.791	Yes	****	<0.0001
						1.76343	1.91908	2.60746	2.38739	2.16732	1.99564		JAM1:O Low vs. GP59:ON Low	-0.1396	-0.3570 to 0.07781	No	ns	0.6178
						1.74036	1.87506	2.70501	2.84696	1.91381	2.04922		JAM1:O Low vs. GP59:AN Low	-1.613	-1.856 to -1.370	Yes	****	<0.0001
						1.07918	1.90849	2.06819	2.78462	2.4843	2.03342		JAM1:O Low vs. GP59:O-High	-0.3735	-0.5705 to -0.1765	Yes	****	<0.0001
						1.11394	1.6902	2.74586	2.1271	1.86923	2.38202		JAM1:O Low vs. GP59:ON-High	-0.0827	-0.2749 to 0.1095	No	ns	0.9609
						1.32222	1.14613	2.7348	2.18752	2.12057	2.04532		JAM1:O Low vs. GP59:AN-High	-0.2183	-0.4084 to -0.02818	Yes	**	0.0098
						2.89042	2.0569	2.6464	2.4216	2.37291	2.233		JAM1:ON Low vs. JAM1:AN Low	-1.577	-1.795 to -1.360	Yes	****	<0.0001
						2.62325	2.49969	2.48572	2.75587	2.13033	1.90309		JAM1:ON Low vs. JAM1:O-High	-0.3323	-0.5245 to -0.1401	Yes	****	<0.0001
						2.48287	2.63649	2.09691	2.74507	1.86923	2.13354		JAM1:ON Low vs. JAM1:ON-High	-0.4542	-0.6443 to -0.2641	Yes	****	<0.0001
						2.1271	2.6464	2.74115	2.15836	2.42488	2.18469		JAM1:ON Low vs. JAM1:AN-High	-0.9785	-1.172 to -0.7852	Yes	****	<0.0001
						2.62325	2.45332	2.69723	2.18752	1.83251	2.52244		JAM1:ON Low vs. GP59:O Low	1.378	1.161 to 1.595	Yes	****	<0.0001
						2.5977	1.99564	2.75891	2.48287	2.11059	2.02119		JAM1:ON Low vs. GP59:ON Low	-0.3348	-0.5522 to -0.1174	Yes	****	<0.0001
						2.55023	2.46389	2.48996	2.78746	2.3784	2.22011		JAM1:ON Low vs. GP59:AN Low	-1.808	-2.051 to -1.565	Yes	****	<0.0001
						2.08991	2.53529	2.75128	2.71684	2.14922	2.04922		JAM1:ON Low vs. GP59:O-High	-0.5687	-0.7657 to -0.3717	Yes	****	<0.0001
						2.84696	2.60423	2.08279		1.86332	2.0086		JAM1:ON Low vs. GP59:ON-High	-0.2779	-0.4701 to -0.08574	Yes	***	0.0002
						2.58092	2.50651	2.74429		2.56348	1.92428		JAM1:ON Low vs. GP59:AN-High	-0.4135	-0.6036 to -0.2234	Yes	****	<0.0001
						2.3032	2.03743	2.67394		1.85126	2.35603		JAM1:AN Low vs. JAM1:O-High	1.245	1.053 to 1.437	Yes	****	<0.0001
						2.07188	2.55751	2.71181		2.17898	2.01284		JAM1:AN Low vs. JAM1:ON-High	1.123	0.9329 to 1.313	Yes	****	<0.0001
						2.57978	2.62839	2.53148		2.39794	2.25527		JAM1:AN Low vs. JAM1:AN-High	0.5987	0.4054 to 0.7920	Yes	****	<0.0001
						2.55509	2.62221	2.11059		2.11394	1.79239		JAM1:AN Low vs. GP59:O Low	2.955	2.738 to 3.173	Yes	****	<0.0001
						2.37107	2.44091			1.81291	2.09342		JAM1:AN Low vs. GP59:ON Low	1.242	1.025 to 1.460	Yes	****	<0.0001
						2.03342	1.97772			2.50379	2.07555		JAM1:AN Low vs. GP59:AN Low	-0.2306	-0.4737 to 0.01247	No	ns	0.0817
							2.52244				2.49554		JAM1:AN Low vs. GP59:O-High	1.009	0.8115 to 1.206	Yes	****	<0.0001
							2.52763				1.99123		JAM1:AN Low vs. GP59:ON-High	1.299	1.107 to 1.491	Yes	****	<0.0001
							2.57978				2.24055		JAM1:AN Low vs. GP59:AN-High	1.164	0.9736 to 1.354	Yes	****	<0.0001
							2.49554				1.93952		JAM1:O-High vs. JAM1:ON-High	-0.1219	-0.2825 to 0.03874	No	ns	0.3481
													JAM1:O-High vs. JAM1:AN-High	-0.6462	-0.8106 to -0.4818	Yes	****	<0.0001
													JAM1:O-High vs. GP59:O Low	1.71	1.518 to 1.902	Yes	****	<0.0001
													JAM1:O-High vs. GP59:ON Low	-0.0025	-0.1947 to 0.1897	No	ns	>0.9999
													JAM1:O-High vs. GP59:AN Low	-1.476	-1.696 to -1.255	Yes	****	<0.0001
													JAM1:O-High vs. GP59:O-High	-0.2364	-0.4052 to -0.06762	Yes	***	0.0003
													JAM1:O-High vs. GP59:ON-High	0.0544	-0.1087 to 0.2175	No	ns	0.9948
													JAM1:O-High vs. GP59:AN-High	-0.0812	-0.2418 to 0.07944	No	ns	0.8859
													JAM1:ON-High vs. JAM1:AN-High	-0.5243	-0.6863 to -0.3623	Yes	****	<0.0001
													JAM1:ON-High vs. GP59:O Low	1.832	1.642 to 2.022	Yes	****	<0.0001
													JAM1:ON-High vs. GP59:ON Low	0.1194	-0.07072 to 0.3095	No	ns	0.6509
													JAM1:ON-High vs. GP59:AN Low	-1.354	-1.573 to -1.135	Yes	****	<0.0001
													JAM1:ON-High vs. GP59:O-High	-0.1145	-0.2809 to 0.05194	No	ns	0.5084
													JAM1:ON-High vs. GP59:ON-High	0.1763	0.01566 to 0.3369	Yes	*	0.0177
													JAM1:ON-High vs. GP59:AN-High	0.0407	-0.1175 to 0.1989	No	ns	0.9995
													JAM1:AN-High vs. GP59:O Low	2.357	2.163 to 2.550	Yes	****	<0.0001
													JAM1:AN-High vs. GP59:ON Low	0.6437	0.4504 to 0.8370	Yes	****	<0.0001
													JAM1:AN-High vs. GP59:AN Low	-0.8293	-1.051 to -0.6076	Yes	****	<0.0001
													JAM1:AN-High vs. GP59:O-High	0.4098	0.2398 to 0.5798	Yes	****	<0.0001
													JAM1:AN-High vs. GP59:ON-High	0.7006	0.5362 to 0.8650	Yes	****	<0.0001
													JAM1:AN-High vs. GP59:AN-High	0.565	0.4030 to 0.7270	Yes	****	<0.0001
													GP59:O Low vs. GP59:ON Low	-1.713	-1.930 to -1.495	Yes	****	<0.0001
													GP59:O Low vs. GP59:AN Low	-3.186	-3.429 to -2.943	Yes	****	<0.0001
													GP59:O Low vs. GP59:O-High	-1.947	-2.144 to -1.750	Yes	****	<0.0001
													GP59:O Low vs. GP59:ON-High	-1.656	-1.848 to -1.464	Yes	****	<0.0001
													GP59:O Low vs. GP59:AN-High	-1.792	-1.982 to -1.601	Yes	****	<0.0001
													GP59:ON Low vs. GP59:AN Low	-1.473	-1.716 to -1.230	Yes	****	<0.0001
													GP59:ON Low vs. GP59:O-High	-0.2339	-0.4309 to -0.03686	Yes	**	0.0061
													GP59:ON Low vs. GP59:ON-High	0.0569	-0.1353 to 0.2491	No	ns	0.9982
													GP59:ON Low vs. GP59:AN-High	-0.0787	-0.2688 to 0.1114	No	ns	0.9706
													GP59:AN Low vs. GP59:O-High	1.239	1.014 to 1.464	Yes	****	<0.0001
													GP59:AN Low vs. GP59:ON-High	1.53	1.309 to 1.751	Yes	****	<0.0001
													GP59:AN Low vs. GP59:AN-High	1.394	1.175 to 1.613	Yes	****	<0.0001
													GP59:O-High vs. GP59:ON-High	0.2908	0.1220 to 0.4596	Yes	****	<0.0001
													GP59:O-High vs. GP59:AN-High	0.1552	-0.01124 to 0.3216	No	ns	0.0947
													GP59:ON-High vs. GP59:AN-High	-0.1356	-0.2962 to 0.02504	No	ns	0.1957
													Test details	Predicted (LS) mean 1	Predicted (LS) mean 2	Predicted (LS) mean diff.	SE of diff.	N1	N2	q	DF
													JAM1:O Low vs. JAM1:ON Low	1.654	1.459	0.1952	0.06625	36	36	4.167	574
													JAM1:O Low vs. JAM1:AN Low	1.654	3.036	-1.382	0.06625	36	36	29.5	574
													JAM1:O Low vs. JAM1:O-High	1.654	1.791	-0.1371	0.05856	36	64	3.311	574
													JAM1:O Low vs. JAM1:ON-High	1.654	1.913	-0.259	0.05793	36	68	6.322	574
													JAM1:O Low vs. JAM1:AN-High	1.654	2.438	-0.7833	0.0589	36	62	18.81	574
													JAM1:O Low vs. GP59:O Low	1.654	0.0811	1.573	0.06625	36	36	33.58	574
													JAM1:O Low vs. GP59:ON Low	1.654	1.794	-0.1396	0.06625	36	36	2.98	574
													JAM1:O Low vs. GP59:AN Low	1.654	3.267	-1.613	0.07407	36	24	30.79	574
													JAM1:O Low vs. GP59:O-High	1.654	2.028	-0.3735	0.06004	36	56	8.797	574
													JAM1:O Low vs. GP59:ON-High	1.654	1.737	-0.0827	0.05856	36	64	1.997	574
													JAM1:O Low vs. GP59:AN-High	1.654	1.873	-0.2183	0.05793	36	68	5.329	574
													JAM1:ON Low vs. JAM1:AN Low	1.459	3.036	-1.577	0.06625	36	36	33.67	574
													JAM1:ON Low vs. JAM1:O-High	1.459	1.791	-0.3323	0.05856	36	64	8.025	574
													JAM1:ON Low vs. JAM1:ON-High	1.459	1.913	-0.4542	0.05793	36	68	11.09	574
													JAM1:ON Low vs. JAM1:AN-High	1.459	2.438	-0.9785	0.0589	36	62	23.5	574
													JAM1:ON Low vs. GP59:O Low	1.459	0.0811	1.378	0.06625	36	36	29.42	574
													JAM1:ON Low vs. GP59:ON Low	1.459	1.794	-0.3348	0.06625	36	36	7.147	574
													JAM1:ON Low vs. GP59:AN Low	1.459	3.267	-1.808	0.07407	36	24	34.52	574
													JAM1:ON Low vs. GP59:O-High	1.459	2.028	-0.5687	0.06004	36	56	13.39	574
													JAM1:ON Low vs. GP59:ON-High	1.459	1.737	-0.2779	0.05856	36	64	6.712	574
													JAM1:ON Low vs. GP59:AN-High	1.459	1.873	-0.4135	0.05793	36	68	10.09	574
													JAM1:AN Low vs. JAM1:O-High	3.036	1.791	1.245	0.05856	36	64	30.07	574
													JAM1:AN Low vs. JAM1:ON-High	3.036	1.913	1.123	0.05793	36	68	27.41	574
													JAM1:AN Low vs. JAM1:AN-High	3.036	2.438	0.5987	0.0589	36	62	14.38	574
													JAM1:AN Low vs. GP59:O Low	3.036	0.0811	2.955	0.06625	36	36	63.08	574
													JAM1:AN Low vs. GP59:ON Low	3.036	1.794	1.242	0.06625	36	36	26.52	574
													JAM1:AN Low vs. GP59:AN Low	3.036	3.267	-0.2306	0.07407	36	24	4.403	574
													JAM1:AN Low vs. GP59:O-High	3.036	2.028	1.009	0.06004	36	56	23.75	574
													JAM1:AN Low vs. GP59:ON-High	3.036	1.737	1.299	0.05856	36	64	31.38	574
													JAM1:AN Low vs. GP59:AN-High	3.036	1.873	1.164	0.05793	36	68	28.41	574
													JAM1:O-High vs. JAM1:ON-High	1.791	1.913	-0.1219	0.04895	64	68	3.522	574
													JAM1:O-High vs. JAM1:AN-High	1.791	2.438	-0.6462	0.05009	64	62	18.25	574
													JAM1:O-High vs. GP59:O Low	1.791	0.0811	1.71	0.05856	64	36	41.31	574
													JAM1:O-High vs. GP59:ON Low	1.791	1.794	-0.0025	0.05856	64	36	0.06038	574
													JAM1:O-High vs. GP59:AN Low	1.791	3.267	-1.476	0.06728	64	24	31.02	574
													JAM1:O-High vs. GP59:O-High	1.791	2.028	-0.2364	0.05143	64	56	6.5	574
													JAM1:O-High vs. GP59:ON-High	1.791	1.737	0.0544	0.04969	64	64	1.548	574
													JAM1:O-High vs. GP59:AN-High	1.791	1.873	-0.0812	0.04895	64	68	2.346	574
													JAM1:ON-High vs. JAM1:AN-High	1.913	2.438	-0.5243	0.04936	68	62	15.02	574
													JAM1:ON-High vs. GP59:O Low	1.913	0.0811	1.832	0.05793	68	36	44.73	574
													JAM1:ON-High vs. GP59:ON Low	1.913	1.794	0.1194	0.05793	68	36	2.915	574
													JAM1:ON-High vs. GP59:AN Low	1.913	3.267	-1.354	0.06673	68	24	28.68	574
													JAM1:ON-High vs. GP59:O-High	1.913	2.028	-0.1145	0.05072	68	56	3.193	574
													JAM1:ON-High vs. GP59:ON-High	1.913	1.737	0.1763	0.04895	68	64	5.093	574
													JAM1:ON-High vs. GP59:AN-High	1.913	1.873	0.0407	0.0482	68	68	1.194	574
													JAM1:AN-High vs. GP59:O Low	2.438	0.0811	2.357	0.0589	62	36	56.58	574
													JAM1:AN-High vs. GP59:ON Low	2.438	1.794	0.6437	0.0589	62	36	15.46	574
													JAM1:AN-High vs. GP59:AN Low	2.438	3.267	-0.8293	0.06757	62	24	17.36	574
													JAM1:AN-High vs. GP59:O-High	2.438	2.028	0.4098	0.05182	62	56	11.18	574
													JAM1:AN-High vs. GP59:ON-High	2.438	1.737	0.7006	0.05009	62	64	19.78	574
													JAM1:AN-High vs. GP59:AN-High	2.438	1.873	0.565	0.04936	62	68	16.19	574
													GP59:O Low vs. GP59:ON Low	0.0811	1.794	-1.713	0.06625	36	36	36.56	574
													GP59:O Low vs. GP59:AN Low	0.0811	3.267	-3.186	0.07407	36	24	60.83	574
													GP59:O Low vs. GP59:O-High	0.0811	2.028	-1.947	0.06004	36	56	45.85	574
													GP59:O Low vs. GP59:ON-High	0.0811	1.737	-1.656	0.05856	36	64	39.99	574
													GP59:O Low vs. GP59:AN-High	0.0811	1.873	-1.792	0.05793	36	68	43.73	574
													GP59:ON Low vs. GP59:AN Low	1.794	3.267	-1.473	0.07407	36	24	28.12	574
													GP59:ON Low vs. GP59:O-High	1.794	2.028	-0.2339	0.06004	36	56	5.509	574
													GP59:ON Low vs. GP59:ON-High	1.794	1.737	0.0569	0.05856	36	64	1.374	574
													GP59:ON Low vs. GP59:AN-High	1.794	1.873	-0.0787	0.05793	36	68	1.921	574
													GP59:AN Low vs. GP59:O-High	3.267	2.028	1.239	0.06857	24	56	25.55	574
													GP59:AN Low vs. GP59:ON-High	3.267	1.737	1.53	0.06728	24	64	32.16	574
													GP59:AN Low vs. GP59:AN-High	3.267	1.873	1.394	0.06673	24	68	29.55	574
													GP59:O-High vs. GP59:ON-High	2.028	1.737	0.2908	0.05143	56	64	7.996	574
													GP59:O-High vs. GP59:AN-High	2.028	1.873	0.1552	0.05072	56	68	4.327	574
													GP59:ON-High vs. GP59:AN-High	1.737	1.873	-0.1356	0.04895	64	68	3.918	574
													Compact letter display
													GP59:AN Low	A
													JAM1:AN Low	A
													JAM1:AN-High	B
													GP59:O-High	C
													JAM1:ON-High	C D
													GP59:AN-High	C D E
													GP59:ON Low	D F
													JAM1:O-High	D F
													GP59:ON-High	E F
													JAM1:O Low	F G
													JAM1:ON Low	G
													GP59:O Low	H

## Sheet: narG2
Low						High
JAM1	JAM1	JAM1	GP59	GP59	GP59	JAM1	JAM1	JAM1	GP59	GP59	GP59
O	ON	AN	O	ON	AN	O	ON	AN	O	ON	AN
0.843	0.312	0.565	0.479	0.354	2.048	1.299	1.494	1.727	1.273	1.741	0.943		Table Analyzed	narG2
0.727	0.493	0.417	0.215	0.107	1.791	1.6	1.18	1.624	1.127	1.587	1.346
0.952	0.196	0.715	0.498	0.49	2.276	1.335	1.498	1.949	1.215	1.799	1.587		Two-way ANOVA	Ordinary
0.913	0.32	0.569	0.453	0.42	2.013	1.557	1.477	1.351	1.106	0.975	0.534		Alpha	0.05
0.793	0.456	0.444	0.217	0.143	1.833	1.472	1.485	1.708	1.358	0.772	0.556
1.031	0.223	0.791	0.522	0.491	2.236	1.189	1.527	1.551	0.988	1.047	1.061		Source of Variation	% of total variation	P value	P value summary	Significant?
0.855	0.307	0.433	0.534	0.465	2.055	1.349	1.195	1.977	1.271	1.801	1.027		Interaction	23.01	<0.0001	****	Yes
0.87	0.431	0.535	0.318	0.334	1.772	1.627	1.511	1.507	1.113	1.585	1.403		Row Factor	0.2916	0.0314	*	Yes
1.07	0.288	0.821	0.534	0.494	2.251	1.416	1.5	1.797	1.422	1.827	1.635		Column Factor	41.4	<0.0001	****	Yes
0.925	0.316	0.438	0.508	0.531	2.02	1.592	1.536	1.68	1.105	1.013	0.556
0.936	0.394	0.562	0.32	0.371	1.814	1.506	1.452	1.972	1.378	0.809	0.582		ANOVA table	SS (Type III)	DF	MS	F (DFn, DFd)	P value
1.149	0.318	0.896	0.559	0.496	2.21	1.107	1.171	1.258	1.011	1.075	1.01		Interaction	48.46	5	9.691	F (5, 566) = 73.42	P<0.0001
1.002	0.422	0.501	0.436	0.364	2.148	1.264	1.509	1.777	1.248	1.761	1.026		Row Factor	0.614	1	0.614	F (1, 566) = 4.651	P=0.0314
0.854	0.52	0.559	0.233	0.322	2.094	1.554	1.442	1.607	1.11	1.561	1.314		Column Factor	87.17	5	17.43	F (5, 566) = 132.1	P<0.0001
1.041	0.272	1.031	0.439	0.594	2.155	1.339	1.469	2	1.23	1.63	1.52		Residual	74.71	566	0.132
0.985	0.477	0.601	0.446	0.371	2.211	1.5	1.485	1.414	1.087	0.977	0.542
0.96	0.61	0.638	0.233	0.27	2.161	1.498	1.187	2.31	1.34	0.744	0.661		Difference between row means
1.011	0.25	1.079	0.418	0.685	2.187	1.48	1.522	2.249	1.054	1.106	1.017		Predicted (LS) mean of JAM1	1.296
1.015	0.418	0.369	0.491	0.474	2.156	1.314	1.465	2.342	1.246	1.821	1.11		Predicted (LS) mean of GP59	1.228
0.997	0.459	0.676	0.334	0.55	2.075	1.58	1.521	2.062	1.095	1.56	1.372		Difference between predicted means	0.06762
1.159	0.365	1.136	0.476	0.6	2.129	1.42	1.622	2.315	1.437	1.658	1.567		SE of difference	0.03135
0.998	0.473	0.47	0.501	0.481	2.219	1.535	1.477	2.198	1.085	1.015	0.563		95% CI of difference	0.006037 to 0.1292
1.102	0.548	0.756	0.334	0.497	2.142	1.532	1.487	2.315	1.36	0.781	0.688
1.129	0.344	1.184	0.455	0.689	2.162	1.398	1.42	1.912	1.077	1.134	0.966		Data summary
1.109	0.722	1.215	0.949	0.798		1.169	1.481	2.379	1.385	1.808	0.925		Number of columns (Column Factor)	6
1.085	0.833	1.185	0.717	0.493		1.334	1.602	2.305	1.112	1.859	1.751		Number of rows (Row Factor)	2
1.207	0.731	1.552	1.189	0.823		1.151	1.438	2.365	1.14	0.865	0.487		Number of values	578
1.073	0.774	1.298	0.968	0.757		1.493	1.506	1.969	0.927	0.893	1.434
1.243	0.902	1.209	0.728	0.504		1.489	1.384	2.384	1.189	1.824	0.961
1.227	0.772	1.575	1.136	0.943		1.212	1.144	2.254	1.348	1.914	1.757
1.122	0.717	1.084	1.005	0.909		1.137	1.581	2.338	1.098	0.871	0.468
1.228	0.772	1.303	0.82	0.721		1.328	1.468	1.819	1.188	0.893	1.573		Compare cell means regardless of rows and columns
1.325	0.824	1.658	1.225	0.828		1.158	1.498	2.338	0.933	1.783	1.009
1.085	0.769	1.166	1.024	0.869		1.515	1.385	2.62	1.145	1.691	1.72		Number of families	1
1.386	0.841	1.327	0.831	0.732		1.5	1.465	2.278	1.36	0.867	0.494		Number of comparisons per family	66
1.346	0.865	1.68	1.172	0.948		1.18	1.56	2.112	1.095	0.952	1.391		Alpha	0.05
						1.134	1.429	2.341	1.155	1.799	1.045
						1.287	1.517	2.574	0.907	1.745	1.726		Tukey's multiple comparisons test	Predicted (LS) mean diff.	95.00% CI of diff.	Below threshold?	Summary	Adjusted P Value
						1.155	1.349	1.892	1.172	0.873	0.476
						1.436	1.129	2.407	1.323	0.952	1.529		JAM1:O Low vs. JAM1:ON Low	0.5283	0.2473 to 0.8093	Yes	****	<0.0001
						1.515	2.306	2.676	1.08	2.637	1.054		JAM1:O Low vs. JAM1:AN Low	0.1476	-0.1334 to 0.4286	No	ns	0.8568
						1.503	2.075	2.302	1.204	2.438	2.111		JAM1:O Low vs. JAM1:O-High	-0.5353	-0.7787 to -0.2919	Yes	****	<0.0001
						1.102	2.259	2.019	0.914	2.616	0.78		JAM1:O Low vs. JAM1:ON-High	-0.6113	-0.8627 to -0.3599	Yes	****	<0.0001
						1.281	2.099	2.41	1.127	1.46	1.37		JAM1:O Low vs. JAM1:AN-High	-1.012	-1.278 to -0.7470	Yes	****	<0.0001
						1.161	1.898	2.63	1.918	1.218	1.138		JAM1:O Low vs. GP59:O Low	0.4454	0.1644 to 0.7264	Yes	****	<0.0001
						1.458	2.246	1.799	1.829	1.642	2.265		JAM1:O Low vs. GP59:ON Low	0.4954	0.2144 to 0.7764	Yes	****	<0.0001
						1.526	2.04		1.763	2.656	0.766		JAM1:O Low vs. GP59:AN Low	-1.041	-1.322 to -0.7602	Yes	****	<0.0001
						1.471	2.158		1.611	2.505	1.515		JAM1:O Low vs. GP59:O-High	-0.3243	-0.5727 to -0.07589	Yes	**	0.0013
						2.153	2.057		1.901	2.636	1.137		JAM1:O Low vs. GP59:ON-High	-0.5303	-0.7787 to -0.2819	Yes	****	<0.0001
						2.145	1.952		1.949	1.424	2.08		JAM1:O Low vs. GP59:AN-High	-0.1223	-0.3770 to 0.1324	No	ns	0.9173
						1.717	2.264		1.831	1.172	0.885		JAM1:ON Low vs. JAM1:AN Low	-0.3807	-0.6617 to -0.09966	Yes	***	0.0006
						2.083	2.067		1.81	1.583	1.327		JAM1:ON Low vs. JAM1:O-High	-1.064	-1.307 to -0.8202	Yes	****	<0.0001
						2.107	2.271		1.672	2.657	1.222		JAM1:ON Low vs. JAM1:ON-High	-1.14	-1.391 to -0.8882	Yes	****	<0.0001
						1.928	2.064		1.933	2.413	2.233		JAM1:ON Low vs. JAM1:AN-High	-1.541	-1.806 to -1.275	Yes	****	<0.0001
						1.887	1.883		1.894	2.448	0.872		JAM1:ON Low vs. GP59:O Low	-0.0829	-0.3639 to 0.1981	No	ns	0.9983
						2.118	2.204		1.812	1.462	1.472		JAM1:ON Low vs. GP59:ON Low	-0.0329	-0.3139 to 0.2481	No	ns	>0.9999
						1.784	2.032		1.779	1.19			JAM1:ON Low vs. GP59:AN Low	-1.57	-1.851 to -1.288	Yes	****	<0.0001
						1.977	2.17		1.592	1.702			JAM1:ON Low vs. GP59:O-High	-0.8526	-1.101 to -0.6042	Yes	****	<0.0001
						1.963	2.022		1.884	2.676			JAM1:ON Low vs. GP59:ON-High	-1.059	-1.307 to -0.8102	Yes	****	<0.0001
						1.89	1.937		1.924	2.479			JAM1:ON Low vs. GP59:AN-High	-0.6506	-0.9053 to -0.3959	Yes	****	<0.0001
						2.118			1.813	2.467			JAM1:AN Low vs. JAM1:O-High	-0.6829	-0.9263 to -0.4395	Yes	****	<0.0001
						2.098			1.826	1.426			JAM1:AN Low vs. JAM1:ON-High	-0.7589	-1.010 to -0.5075	Yes	****	<0.0001
						1.72			1.652	1.144			JAM1:AN Low vs. JAM1:AN-High	-1.16	-1.425 to -0.8946	Yes	****	<0.0001
						2.026			1.915	1.642			JAM1:AN Low vs. GP59:O Low	0.2978	0.01676 to 0.5788	Yes	*	0.0269
						2.133							JAM1:AN Low vs. GP59:ON Low	0.3478	0.06676 to 0.6288	Yes	**	0.0032
						2.219							JAM1:AN Low vs. GP59:AN Low	-1.189	-1.470 to -0.9078	Yes	****	<0.0001
						1.852							JAM1:AN Low vs. GP59:O-High	-0.4719	-0.7203 to -0.2235	Yes	****	<0.0001
						2.072							JAM1:AN Low vs. GP59:ON-High	-0.6779	-0.9263 to -0.4295	Yes	****	<0.0001
						1.788							JAM1:AN Low vs. GP59:AN-High	-0.2699	-0.5246 to -0.01519	Yes	*	0.0269
						1.92							JAM1:O-High vs. JAM1:ON-High	-0.076	-0.2844 to 0.1324	No	ns	0.9891
						1.989							JAM1:O-High vs. JAM1:AN-High	-0.477	-0.7021 to -0.2519	Yes	****	<0.0001
						2.181							JAM1:O-High vs. GP59:O Low	0.9807	0.7373 to 1.224	Yes	****	<0.0001
													JAM1:O-High vs. GP59:ON Low	1.031	0.7873 to 1.274	Yes	****	<0.0001
													JAM1:O-High vs. GP59:AN Low	-0.5059	-0.7493 to -0.2625	Yes	****	<0.0001
													JAM1:O-High vs. GP59:O-High	0.211	0.006158 to 0.4158	Yes	*	0.0368
													JAM1:O-High vs. GP59:ON-High	0.005	-0.1998 to 0.2098	No	ns	>0.9999
													JAM1:O-High vs. GP59:AN-High	0.413	0.2006 to 0.6254	Yes	****	<0.0001
													JAM1:ON-High vs. JAM1:AN-High	-0.401	-0.6347 to -0.1673	Yes	****	<0.0001
													JAM1:ON-High vs. GP59:O Low	1.057	0.8053 to 1.308	Yes	****	<0.0001
													JAM1:ON-High vs. GP59:ON Low	1.107	0.8553 to 1.358	Yes	****	<0.0001
													JAM1:ON-High vs. GP59:AN Low	-0.4299	-0.6813 to -0.1785	Yes	****	<0.0001
													JAM1:ON-High vs. GP59:O-High	0.287	0.07274 to 0.5013	Yes	***	0.0008
													JAM1:ON-High vs. GP59:ON-High	0.081	-0.1333 to 0.2953	No	ns	0.9854
													JAM1:ON-High vs. GP59:AN-High	0.489	0.2675 to 0.7105	Yes	****	<0.0001
													JAM1:AN-High vs. GP59:O Low	1.458	1.192 to 1.723	Yes	****	<0.0001
													JAM1:AN-High vs. GP59:ON Low	1.508	1.242 to 1.773	Yes	****	<0.0001
													JAM1:AN-High vs. GP59:AN Low	-0.0289	-0.2942 to 0.2364	No	ns	>0.9999
													JAM1:AN-High vs. GP59:O-High	0.688	0.4575 to 0.9185	Yes	****	<0.0001
													JAM1:AN-High vs. GP59:ON-High	0.482	0.2515 to 0.7125	Yes	****	<0.0001
													JAM1:AN-High vs. GP59:AN-High	0.89	0.6527 to 1.127	Yes	****	<0.0001
													GP59:O Low vs. GP59:ON Low	0.05	-0.2310 to 0.3310	No	ns	>0.9999
													GP59:O Low vs. GP59:AN Low	-1.487	-1.768 to -1.206	Yes	****	<0.0001
													GP59:O Low vs. GP59:O-High	-0.7697	-1.018 to -0.5213	Yes	****	<0.0001
													GP59:O Low vs. GP59:ON-High	-0.9757	-1.224 to -0.7273	Yes	****	<0.0001
													GP59:O Low vs. GP59:AN-High	-0.5677	-0.8224 to -0.3130	Yes	****	<0.0001
													GP59:ON Low vs. GP59:AN Low	-1.537	-1.818 to -1.256	Yes	****	<0.0001
													GP59:ON Low vs. GP59:O-High	-0.8197	-1.068 to -0.5713	Yes	****	<0.0001
													GP59:ON Low vs. GP59:ON-High	-1.026	-1.274 to -0.7773	Yes	****	<0.0001
													GP59:ON Low vs. GP59:AN-High	-0.6177	-0.8724 to -0.3630	Yes	****	<0.0001
													GP59:AN Low vs. GP59:O-High	0.7169	0.4685 to 0.9653	Yes	****	<0.0001
													GP59:AN Low vs. GP59:ON-High	0.5109	0.2625 to 0.7593	Yes	****	<0.0001
													GP59:AN Low vs. GP59:AN-High	0.9189	0.6642 to 1.174	Yes	****	<0.0001
													GP59:O-High vs. GP59:ON-High	-0.206	-0.4168 to 0.004780	No	ns	0.0624
													GP59:O-High vs. GP59:AN-High	0.202	-0.01618 to 0.4202	No	ns	0.1004
													GP59:ON-High vs. GP59:AN-High	0.408	0.1898 to 0.6262	Yes	****	<0.0001
													Test details	Predicted (LS) mean 1	Predicted (LS) mean 2	Predicted (LS) mean diff.	SE of diff.	N1	N2	q	DF
													JAM1:O Low vs. JAM1:ON Low	1.049	0.5204	0.5283	0.08564	36	36	8.725	566
													JAM1:O Low vs. JAM1:AN Low	1.049	0.9011	0.1476	0.08564	36	36	2.438	566
													JAM1:O Low vs. JAM1:O-High	1.049	1.584	-0.5353	0.07416	36	72	10.21	566
													JAM1:O Low vs. JAM1:ON-High	1.049	1.66	-0.6113	0.07659	36	60	11.29	566
													JAM1:O Low vs. JAM1:AN-High	1.049	2.061	-1.012	0.08085	36	46	17.71	566
													JAM1:O Low vs. GP59:O Low	1.049	0.6033	0.4454	0.08564	36	36	7.356	566
													JAM1:O Low vs. GP59:ON Low	1.049	0.5533	0.4954	0.08564	36	36	8.181	566
													JAM1:O Low vs. GP59:AN Low	1.049	2.09	-1.041	0.08564	36	36	17.19	566
													JAM1:O Low vs. GP59:O-High	1.049	1.373	-0.3243	0.07569	36	64	6.059	566
													JAM1:O Low vs. GP59:ON-High	1.049	1.579	-0.5303	0.07569	36	64	9.908	566
													JAM1:O Low vs. GP59:AN-High	1.049	1.171	-0.1223	0.07761	36	56	2.228	566
													JAM1:ON Low vs. JAM1:AN Low	0.5204	0.9011	-0.3807	0.08564	36	36	6.287	566
													JAM1:ON Low vs. JAM1:O-High	0.5204	1.584	-1.064	0.07416	36	72	20.28	566
													JAM1:ON Low vs. JAM1:ON-High	0.5204	1.66	-1.14	0.07659	36	60	21.04	566
													JAM1:ON Low vs. JAM1:AN-High	0.5204	2.061	-1.541	0.08085	36	46	26.95	566
													JAM1:ON Low vs. GP59:O Low	0.5204	0.6033	-0.0829	0.08564	36	36	1.369	566
													JAM1:ON Low vs. GP59:ON Low	0.5204	0.5533	-0.0329	0.08564	36	36	0.5433	566
													JAM1:ON Low vs. GP59:AN Low	0.5204	2.09	-1.57	0.08564	36	36	25.92	566
													JAM1:ON Low vs. GP59:O-High	0.5204	1.373	-0.8526	0.07569	36	64	15.93	566
													JAM1:ON Low vs. GP59:ON-High	0.5204	1.579	-1.059	0.07569	36	64	19.78	566
													JAM1:ON Low vs. GP59:AN-High	0.5204	1.171	-0.6506	0.07761	36	56	11.85	566
													JAM1:AN Low vs. JAM1:O-High	0.9011	1.584	-0.6829	0.07416	36	72	13.02	566
													JAM1:AN Low vs. JAM1:ON-High	0.9011	1.66	-0.7589	0.07659	36	60	14.01	566
													JAM1:AN Low vs. JAM1:AN-High	0.9011	2.061	-1.16	0.08085	36	46	20.29	566
													JAM1:AN Low vs. GP59:O Low	0.9011	0.6033	0.2978	0.08564	36	36	4.918	566
													JAM1:AN Low vs. GP59:ON Low	0.9011	0.5533	0.3478	0.08564	36	36	5.744	566
													JAM1:AN Low vs. GP59:AN Low	0.9011	2.09	-1.189	0.08564	36	36	19.63	566
													JAM1:AN Low vs. GP59:O-High	0.9011	1.373	-0.4719	0.07569	36	64	8.817	566
													JAM1:AN Low vs. GP59:ON-High	0.9011	1.579	-0.6779	0.07569	36	64	12.67	566
													JAM1:AN Low vs. GP59:AN-High	0.9011	1.171	-0.2699	0.07761	36	56	4.918	566
													JAM1:O-High vs. JAM1:ON-High	1.584	1.66	-0.076	0.06351	72	60	1.692	566
													JAM1:O-High vs. JAM1:AN-High	1.584	2.061	-0.477	0.06858	72	46	9.837	566
													JAM1:O-High vs. GP59:O Low	1.584	0.6033	0.9807	0.07416	72	36	18.7	566
													JAM1:O-High vs. GP59:ON Low	1.584	0.5533	1.031	0.07416	72	36	19.65	566
													JAM1:O-High vs. GP59:AN Low	1.584	2.09	-0.5059	0.07416	72	36	9.647	566
													JAM1:O-High vs. GP59:O-High	1.584	1.373	0.211	0.06242	72	64	4.781	566
													JAM1:O-High vs. GP59:ON-High	1.584	1.579	0.005	0.06242	72	64	0.1133	566
													JAM1:O-High vs. GP59:AN-High	1.584	1.171	0.413	0.06473	72	56	9.023	566
													JAM1:ON-High vs. JAM1:AN-High	1.66	2.061	-0.401	0.0712	60	46	7.965	566
													JAM1:ON-High vs. GP59:O Low	1.66	0.6033	1.057	0.07659	60	36	19.51	566
													JAM1:ON-High vs. GP59:ON Low	1.66	0.5533	1.107	0.07659	60	36	20.43	566
													JAM1:ON-High vs. GP59:AN Low	1.66	2.09	-0.4299	0.07659	60	36	7.938	566
													JAM1:ON-High vs. GP59:O-High	1.66	1.373	0.287	0.06529	60	64	6.217	566
													JAM1:ON-High vs. GP59:ON-High	1.66	1.579	0.081	0.06529	60	64	1.755	566
													JAM1:ON-High vs. GP59:AN-High	1.66	1.171	0.489	0.06751	60	56	10.24	566
													JAM1:AN-High vs. GP59:O Low	2.061	0.6033	1.458	0.08085	46	36	25.5	566
													JAM1:AN-High vs. GP59:ON Low	2.061	0.5533	1.508	0.08085	46	36	26.37	566
													JAM1:AN-High vs. GP59:AN Low	2.061	2.09	-0.0289	0.08085	46	36	0.5055	566
													JAM1:AN-High vs. GP59:O-High	2.061	1.373	0.688	0.07023	46	64	13.85	566
													JAM1:AN-High vs. GP59:ON-High	2.061	1.579	0.482	0.07023	46	64	9.706	566
													JAM1:AN-High vs. GP59:AN-High	2.061	1.171	0.89	0.0723	46	56	17.41	566
													GP59:O Low vs. GP59:ON Low	0.6033	0.5533	0.05	0.08564	36	36	0.8257	566
													GP59:O Low vs. GP59:AN Low	0.6033	2.09	-1.487	0.08564	36	36	24.55	566
													GP59:O Low vs. GP59:O-High	0.6033	1.373	-0.7697	0.07569	36	64	14.38	566
													GP59:O Low vs. GP59:ON-High	0.6033	1.579	-0.9757	0.07569	36	64	18.23	566
													GP59:O Low vs. GP59:AN-High	0.6033	1.171	-0.5677	0.07761	36	56	10.34	566
													GP59:ON Low vs. GP59:AN Low	0.5533	2.09	-1.537	0.08564	36	36	25.38	566
													GP59:ON Low vs. GP59:O-High	0.5533	1.373	-0.8197	0.07569	36	64	15.32	566
													GP59:ON Low vs. GP59:ON-High	0.5533	1.579	-1.026	0.07569	36	64	19.16	566
													GP59:ON Low vs. GP59:AN-High	0.5533	1.171	-0.6177	0.07761	36	56	11.26	566
													GP59:AN Low vs. GP59:O-High	2.09	1.373	0.7169	0.07569	36	64	13.39	566
													GP59:AN Low vs. GP59:ON-High	2.09	1.579	0.5109	0.07569	36	64	9.546	566
													GP59:AN Low vs. GP59:AN-High	2.09	1.171	0.9189	0.07761	36	56	16.74	566
													GP59:O-High vs. GP59:ON-High	1.373	1.579	-0.206	0.06423	64	64	4.536	566
													GP59:O-High vs. GP59:AN-High	1.373	1.171	0.202	0.06648	64	56	4.297	566
													GP59:ON-High vs. GP59:AN-High	1.579	1.171	0.408	0.06648	64	56	8.679	566
													Compact letter display
													GP59:AN Low	A
													JAM1:AN-High	A
													JAM1:ON-High	B
													JAM1:O-High	B
													GP59:ON-High	B C
													GP59:O-High	C D
													GP59:AN-High	D E
													JAM1:O Low	E F
													JAM1:AN Low	F
													GP59:O Low	G
													GP59:ON Low	G
													JAM1:ON Low	G

## Sheet: nirK
Low			High
GP59	GP59	GP59	GP59	GP59	GP59
O	ON	AN	O	ON	AN
0.924	0.911	1.864	2.424	1.677	0.33			Table Analyzed	nirK
0.549	0.651	1.635	2.267	1.709	1.232
0.724	0.846	1.413	2.392	1.903	1.663			Two-way ANOVA	Ordinary
0.898	0.976	1.828	2.689	1.396	0.143			Alpha	0.05
0.551	0.687	1.677	2.708	1.337	1.68
0.749	0.848	1.372	2.422	1.652	0.512			Source of Variation	% of total variation	P value	P value summary	Significant?
0.884	0.776	1.883	2.253	1.737	0.415			Interaction	31.63	<0.0001	****	Yes
0.571	0.653	1.647	2.39	1.708	1.289			Row Factor	17.11	<0.0001	****	Yes
0.761	0.875	1.512	2.709	1.931	1.711			Column Factor	4.44	<0.0001	****	Yes
0.859	0.842	1.847	2.731	1.434	0.167
0.573	0.688	1.689	2.371	1.374	1.706			ANOVA table	SS (Type III)	DF	MS	F (DFn, DFd)	P value
0.785	0.876	1.471	2.322	1.681	0.461			Interaction	50.27	2	25.14	F (2, 278) = 139.8	P<0.0001
0.882	0.92	1.964	2.33	1.615	0.54			Row Factor	27.19	1	27.19	F (1, 278) = 151.2	P<0.0001
0.566	0.866	1.938	2.699	1.756	1.215			Column Factor	7.057	2	3.528	F (2, 278) = 19.62	P<0.0001
0.666	0.951	1.291	2.648	1.883	1.74			Residual	50	278	0.1799
0.891	0.926	2.027	2.369	1.291	0.182
0.566	0.812	2.005	2.307	1.216	1.806			Difference between row means
0.644	1.041	1.324	2.328	1.645	0.529			Predicted (LS) mean of GP59-Low	1.196
0.842	0.785	1.983	2.719	1.674	0.624			Predicted (LS) mean of GP59-High	1.86
0.588	0.868	1.95	2.671	1.754	1.273			Difference between predicted means	-0.6633
0.702	0.98	1.39	2.535	1.911	1.787			SE of difference	0.05395
0.851	0.792	2.046	2.252	1.33	0.204			95% CI of difference	-0.7695 to -0.5571
0.588	0.814	2.017	2.212	1.253	1.832
0.681	1.07	1.423	2.52	1.673	0.477			Data summary
1.395	1.354		2.131	2.037	0.314			Number of columns (Column Factor)	3
1.051	1.037		2.498	1.931	1.637			Number of rows (Row Factor)	2
1.415	1.18		2.238	1.964	1.429			Number of values	284
1.414	1.314		2.219	1.285	0.885
1.061	1.048		2.476	1.126	0.35
1.362	1.3		2.111	1.498	1.643
1.355	1.22		2.482	2.084	1.389			Compare cell means regardless of rows and columns
1.073	1.039		2.307	1.947	1.023
1.451	1.209		2.15	2.018	0.522			Number of families	1
1.374	1.179		2.531	1.292	1.621			Number of comparisons per family	15
1.084	1.05		2.071	1.144	1.555			Alpha	0.05
1.399	1.328		2.445	1.499	0.903
			2.292	1.975	0.559			Tukey's multiple comparisons test	Predicted (LS) mean diff.	95.00% CI of diff.	Below threshold?	Summary	Adjusted P Value
			2.157	1.977	1.627
			2.487	1.944	1.515			GP59-Low:O vs. GP59-Low:ON	-0.055	-0.3419 to 0.2319	No	ns	0.994
			2.051	1.181	1.041			GP59-Low:O vs. GP59-Low:AN	-0.807	-1.128 to -0.4863	Yes	****	<0.0001
			3.069	1.006	0.442			GP59-Low:O vs. GP59-High:O	-1.699	-1.956 to -1.442	Yes	****	<0.0001
			2.969	1.49	1.997			GP59-Low:O vs. GP59-High:ON	-0.926	-1.174 to -0.6776	Yes	****	<0.0001
			2.897	2.022	1.904			GP59-Low:O vs. GP59-High:AN	-0.227	-0.4870 to 0.03300	No	ns	0.126
			3.232	1.993	0.821			GP59-Low:ON vs. GP59-Low:AN	-0.752	-1.073 to -0.4313	Yes	****	<0.0001
			2.984	1.998	0.526			GP59-Low:ON vs. GP59-High:O	-1.644	-1.901 to -1.387	Yes	****	<0.0001
			3.099	1.188	2.151			GP59-Low:ON vs. GP59-High:ON	-0.871	-1.119 to -0.6226	Yes	****	<0.0001
			2.971	1.024	1.89			GP59-Low:ON vs. GP59-High:AN	-0.172	-0.4320 to 0.08800	No	ns	0.4053
			2.957	1.491	0.966			GP59-Low:AN vs. GP59-High:O	-0.892	-1.186 to -0.5980	Yes	****	<0.0001
			3.264	2.573	0.651			GP59-Low:AN vs. GP59-High:ON	-0.119	-0.4059 to 0.1679	No	ns	0.8412
			2.955	2.561	1.981			GP59-Low:AN vs. GP59-High:AN	0.58	0.2831 to 0.8769	Yes	****	<0.0001
			3.016	2.721	2.03			GP59-High:O vs. GP59-High:ON	0.773	0.5603 to 0.9857	Yes	****	<0.0001
			3.024	1.881	0.838			GP59-High:O vs. GP59-High:AN	1.472	1.246 to 1.698	Yes	****	<0.0001
			2.835	1.782	0.736			GP59-High:ON vs. GP59-High:AN	0.699	0.4821 to 0.9159	Yes	****	<0.0001
			3.243	2.248	2.135
			2.924	2.592	2.017
			3.046	2.628	0.983			Test details	Predicted (LS) mean 1	Predicted (LS) mean 2	Predicted (LS) mean diff.	SE of diff.	N1	N2	q	DF
			3.025	2.74
			2.895	1.844				GP59-Low:O vs. GP59-Low:ON	0.909	0.964	-0.055	0.09996	36	36	0.7781	278
			3.274	1.736				GP59-Low:O vs. GP59-Low:AN	0.909	1.716	-0.807	0.1118	36	24	10.21	278
			2.895	2.189				GP59-Low:O vs. GP59-High:O	0.909	2.608	-1.699	0.08941	36	60	26.87	278
				2.51				GP59-Low:O vs. GP59-High:ON	0.909	1.835	-0.926	0.08657	36	72	15.13	278
				2.607				GP59-Low:O vs. GP59-High:AN	0.909	1.136	-0.227	0.0906	36	56	3.543	278
				2.701				GP59-Low:ON vs. GP59-Low:AN	0.964	1.716	-0.752	0.1118	36	24	9.516	278
				1.777				GP59-Low:ON vs. GP59-High:O	0.964	2.608	-1.644	0.08941	36	60	26	278
				1.662				GP59-Low:ON vs. GP59-High:ON	0.964	1.835	-0.871	0.08657	36	72	14.23	278
				2.24				GP59-Low:ON vs. GP59-High:AN	0.964	1.136	-0.172	0.0906	36	56	2.685	278
				2.53				GP59-Low:AN vs. GP59-High:O	1.716	2.608	-0.892	0.1024	24	60	12.32	278
				2.674				GP59-Low:AN vs. GP59-High:ON	1.716	1.835	-0.119	0.09996	24	72	1.684	278
				2.72				GP59-Low:AN vs. GP59-High:AN	1.716	1.136	0.58	0.1035	24	56	7.927	278
				1.74				GP59-High:O vs. GP59-High:ON	2.608	1.835	0.773	0.07414	60	72	14.75	278
				1.616				GP59-High:O vs. GP59-High:AN	2.608	1.136	1.472	0.0788	60	56	26.42	278
				2.181				GP59-High:ON vs. GP59-High:AN	1.835	1.136	0.699	0.07557	72	56	13.08	278
								Compact letter display
								GP59-High:O	A
								GP59-High:ON	B
								GP59-Low:AN	B
								GP59-High:AN	C
								GP59-Low:ON	C
								GP59-Low:O	C

## Sheet: narK12f
Low						High
JAM1	JAM1	JAM1	GP59	GP59	GP59	JAM1	JAM1	JAM1	GP59	GP59	GP59
O	ON	AN	O	ON	AN	O	ON	AN	O	ON	AN
0.964	0.479	0.316	0.555	0.543	1.886	0.84	0.782	1.556	0.792	0.99	0.95		Table Analyzed	narK12f
0.98	0.504	0.462	0.462	0.389	1.508	0.876	0.716	1.666	0.759	0.967	0.584
0.917	0.312	0.631	0.509	0.501	1.862	0.893	0.941	1.348	0.862	0.953	0.342		Two-way ANOVA	Ordinary
1.035	0.487	0.32	0.529	0.607	1.85	1.024	0.982	2.109	0.364	0.795	0.511		Alpha	0.05
1.047	0.467	0.49	0.465	0.425	1.55	0.927	0.933	1.298	0.509	0.622	0.782
0.995	0.34	0.707	0.534	0.502	1.822	0.97	0.755	1.536	0.693	0.456	0.916		Source of Variation	% of total variation	P value	P value summary	Significant?
0.969	0.48	0.255	0.537	0.513	1.853	0.89	0.815	1.651	0.79	1.05	1.034		Interaction	30.45	<0.0001	****	Yes
0.957	0.462	0.45	0.544	0.384	1.471	0.903	0.732	1.276	0.745	0.965	0.641		Row Factor	0.9369	0.0004	***	Yes
0.899	0.297	0.627	0.497	0.497	1.864	0.974	0.954	2.137	1.069	0.981	0.389		Column Factor	25.16	<0.0001	****	Yes
1.039	0.489	0.26	0.512	0.58	1.818	1.058	1.005	1.454	0.364	0.834	0.533
1.023	0.427	0.477	0.547	0.42	1.513	0.961	0.985	1.544	0.529	0.66	0.809		ANOVA table	SS (Type III)	DF	MS	F (DFn, DFd)	P value
0.977	0.326	0.702	0.521	0.498	1.823	0.888	0.6	1.72	0.716	0.484	0.865		Interaction	46.74	5	9.349	F (5, 603) = 82.45	P<0.0001
1.124	0.589	0.253	0.513	0.551	1.986	0.779	0.887	1.406	0.716	0.946	0.97		Row Factor	1.438	1	1.438	F (1, 603) = 12.68	P=0.0004
1.109	0.53	0.603	0.48	0.604	1.811	0.888	0.659	2.382	0.753	0.976	0.719		Column Factor	38.63	5	7.726	F (5, 603) = 68.14	P<0.0001
1.006	0.389	0.947	0.45	0.606	1.741	0.833	0.943	1.287	1.007	0.946	0.338		Residual	68.37	603	0.1134
1.107	0.644	0.35	0.521	0.559	2.049	1.018	0.979	1.524	0.417	0.876	0.685
1.213	0.62	0.683	0.479	0.55	1.878	0.973	0.961	1.705	0.522	0.679	0.799		Difference between row means
0.976	0.367	0.995	0.43	0.696	1.773	0.881	0.759	1.333	0.623	0.771	0.849		Predicted (LS) mean of JAM1	1.095
1.128	0.59	0.19	0.496	0.522	1.954	0.829	0.92	2.41	0.714	1.006	1.054		Predicted (LS) mean of GP59	0.9915
1.085	0.49	0.591	0.561	0.6	1.774	0.915	0.675	1.443	0.739	0.975	0.776		Difference between predicted means	0.1037
0.987	0.375	0.943	0.438	0.601	1.742	0.914	0.956	2.139	1.214	0.975	0.386		SE of difference	0.02911
1.112	0.645	0.29	0.504	0.529	2.016	1.053	1.003	2.398	0.415	0.914	0.707		95% CI of difference	0.04650 to 0.1608
1.189	0.58	0.671	0.561	0.545	1.841	1.007	1.013	1.973	0.543	0.716	0.825
0.957	0.354	0.991	0.417	0.691	1.775	0.799	0.603	2.502	0.646	0.799	0.798		Data summary
1.231	0.889	0.965	1.026	0.986		0.709	0.91	2.01	0.904	1.35	0.932		Number of columns (Column Factor)	6
1.339	0.843	1.23	0.965	0.775		0.61	1.013	2.143	0.744	1.188	0.99		Number of rows (Row Factor)	2
1.172	0.848	1.468	1.199	0.835		0.709	0.929	2.347	0.787	1.013	0.464		Number of values	615
1.194	0.941	1.048	1.045	0.945		0.96	0.925	1.922	0.185	0.685	0.531
1.497	0.912	1.254	0.975	0.786		0.943	0.929	2.476	0.34	0.412	1.289
1.192	0.889	1.491	1.147	0.955		0.994	0.305	1.86	0.117	0.303	0.968
1.236	0.89	0.905	1.008	0.957		0.678	0.89	2.127	0.867	1.397	0.996		Compare cell means regardless of rows and columns
1.316	0.803	1.218	1.046	0.77		0.604	0.974	2.452	0.73	1.204	0.446
1.153	0.833	1.464	1.188	0.831		0.715	0.948	2.031	0.836	1.068	0.491		Number of families	1
1.199	0.942	0.988	1.027	0.917		0.982	0.889	1.998	0.19	0.692	1.428		Number of comparisons per family	66
1.474	0.872	1.242	1.057	0.781		0.955	0.592	2.131	0.297	0.43	0.953		Alpha	0.05
1.173	0.874	1.487	1.135	0.95		0.961	0.36	2.401	0.097	0.303	1.124
						0.648	1.016	1.98	0.827	1.306	0.637		Tukey's multiple comparisons test	Predicted (LS) mean diff.	95.00% CI of diff.	Below threshold?	Summary	Adjusted P Value
						0.622	0.956	1.848	0.738	1.197	0.548
						0.649	0.931	2.167	0.932	1.006	1.222		JAM1:O Low vs. JAM1:ON Low	0.505	0.2446 to 0.7654	Yes	****	<0.0001
						0.955	0.923	2.049	0.236	0.766	0.989		JAM1:O Low vs. JAM1:AN Low	0.333	0.07260 to 0.5934	Yes	**	0.0018
						0.989	0.958	2.345	0.354	0.468	1.13		JAM1:O Low vs. JAM1:O-High	0.042	-0.1835 to 0.2675	No	ns	>0.9999
						0.905	0.307	2.439	0.045	0.617	0.619		JAM1:O Low vs. JAM1:ON-High	0.064	-0.1615 to 0.2895	No	ns	0.9988
						0.617	0.995	2.06	0.79	1.353	0.508		JAM1:O Low vs. JAM1:AN-High	-0.855	-1.092 to -0.6182	Yes	****	<0.0001
						0.616	0.917	2.169	0.723	1.213	1.361		JAM1:O Low vs. GP59:O Low	0.419	0.1586 to 0.6794	Yes	****	<0.0001
						0.655	0.95	2.026	0.981	1.061	1.061		JAM1:O Low vs. GP59:ON Low	0.46	0.1996 to 0.7204	Yes	****	<0.0001
						0.976	0.886	2.298	0.243	0.772	1.35		JAM1:O Low vs. GP59:AN Low	-0.688	-0.9791 to -0.3969	Yes	****	<0.0001
						1	0.621	1.84	0.31	0.487	1.353		JAM1:O Low vs. GP59:O-High	0.304	0.07849 to 0.5295	Yes	***	0.0007
						0.873	0.364	2.155	0.025	0.617	0.669		JAM1:O Low vs. GP59:ON-High	0.034	-0.1915 to 0.2595	No	ns	>0.9999
						1.694	1.594	2.103	1.437	1.886	1.006		JAM1:O Low vs. GP59:AN-High	0.182	-0.04571 to 0.4097	No	ns	0.2695
						1.421	1.611	2.402	1.461	1.818	1.226		JAM1:ON Low vs. JAM1:AN Low	-0.172	-0.4324 to 0.08840	No	ns	0.5743
						1.274	1.702	2.048	1.41	1.77	1.146		JAM1:ON Low vs. JAM1:O-High	-0.463	-0.6885 to -0.2375	Yes	****	<0.0001
						1.55	1.604	2.158	0.869	1.281	1.504		JAM1:ON Low vs. JAM1:ON-High	-0.441	-0.6665 to -0.2155	Yes	****	<0.0001
						1.562	1.347	2.08	1.052	1.069	1.493		JAM1:ON Low vs. JAM1:AN-High	-1.36	-1.597 to -1.123	Yes	****	<0.0001
						1.709	1.014	2.356	0.968	1.052	0.645		JAM1:ON Low vs. GP59:O Low	-0.086	-0.3464 to 0.1744	No	ns	0.9953
						1.427	1.534	1.828	1.468	1.905	0.993		JAM1:ON Low vs. GP59:ON Low	-0.045	-0.3054 to 0.2154	No	ns	>0.9999
						1.394	1.576		1.463	1.885	1.371		JAM1:ON Low vs. GP59:AN Low	-1.193	-1.484 to -0.9019	Yes	****	<0.0001
						1.342	1.601		1.457	1.79	1.081		JAM1:ON Low vs. GP59:O-High	-0.201	-0.4265 to 0.02451	No	ns	0.135
						1.444	1.562		0.93	1.244	1.484		JAM1:ON Low vs. GP59:ON-High	-0.471	-0.6965 to -0.2455	Yes	****	<0.0001
						1.418	1.401		1.084	1.022	1.35		JAM1:ON Low vs. GP59:AN-High	-0.323	-0.5507 to -0.09529	Yes	***	0.0002
						1.672	1.023		0.94	0.993	0.843		JAM1:AN Low vs. JAM1:O-High	-0.291	-0.5165 to -0.06549	Yes	**	0.0016
						1.633	1.699		1.361	1.842	1.023		JAM1:AN Low vs. JAM1:ON-High	-0.269	-0.4945 to -0.04349	Yes	**	0.0057
						1.433	1.555		1.455	1.827	1.158		JAM1:AN Low vs. JAM1:AN-High	-1.188	-1.425 to -0.9512	Yes	****	<0.0001
						1.214	1.704		1.556	1.764	1.166		JAM1:AN Low vs. GP59:O Low	0.086	-0.1744 to 0.3464	No	ns	0.9953
						1.544	1.601		0.921	1.362	1.638		JAM1:AN Low vs. GP59:ON Low	0.127	-0.1334 to 0.3874	No	ns	0.9088
						1.608	1.375		1.066	1.125	1.49		JAM1:AN Low vs. GP59:AN Low	-1.021	-1.312 to -0.7299	Yes	****	<0.0001
						1.62	1.017		0.898	1.367	0.819		JAM1:AN Low vs. GP59:O-High	-0.029	-0.2545 to 0.1965	No	ns	>0.9999
						1.366	1.639		1.392	1.861	1.009		JAM1:AN Low vs. GP59:ON-High	-0.299	-0.5245 to -0.07349	Yes	***	0.001
						1.406	1.519		1.456	1.894	1.303		JAM1:AN Low vs. GP59:AN-High	-0.151	-0.3787 to 0.07671	No	ns	0.5681
						1.282	1.603		1.603	1.783			JAM1:O-High vs. JAM1:ON-High	0.022	-0.1621 to 0.2061	No	ns	>0.9999
						1.439	1.56		0.982	1.325			JAM1:O-High vs. JAM1:AN-High	-0.897	-1.095 to -0.6992	Yes	****	<0.0001
						1.464	1.429		1.097	1.079			JAM1:O-High vs. GP59:O Low	0.377	0.1515 to 0.6025	Yes	****	<0.0001
						1.583	1.027		0.87	1.307			JAM1:O-High vs. GP59:ON Low	0.418	0.1925 to 0.6435	Yes	****	<0.0001
													JAM1:O-High vs. GP59:AN Low	-0.73	-0.9904 to -0.4696	Yes	****	<0.0001
													JAM1:O-High vs. GP59:O-High	0.262	0.07787 to 0.4461	Yes	***	0.0002
													JAM1:O-High vs. GP59:ON-High	-0.008	-0.1921 to 0.1761	No	ns	>0.9999
													JAM1:O-High vs. GP59:AN-High	0.14	-0.04682 to 0.3268	No	ns	0.3684
													JAM1:ON-High vs. JAM1:AN-High	-0.919	-1.117 to -0.7212	Yes	****	<0.0001
													JAM1:ON-High vs. GP59:O Low	0.355	0.1295 to 0.5805	Yes	****	<0.0001
													JAM1:ON-High vs. GP59:ON Low	0.396	0.1705 to 0.6215	Yes	****	<0.0001
													JAM1:ON-High vs. GP59:AN Low	-0.752	-1.012 to -0.4916	Yes	****	<0.0001
													JAM1:ON-High vs. GP59:O-High	0.24	0.05587 to 0.4241	Yes	**	0.0013
													JAM1:ON-High vs. GP59:ON-High	-0.03	-0.2141 to 0.1541	No	ns	>0.9999
													JAM1:ON-High vs. GP59:AN-High	0.118	-0.06882 to 0.3048	No	ns	0.6428
													JAM1:AN-High vs. GP59:O Low	1.274	1.037 to 1.511	Yes	****	<0.0001
													JAM1:AN-High vs. GP59:ON Low	1.315	1.078 to 1.552	Yes	****	<0.0001
													JAM1:AN-High vs. GP59:AN Low	0.167	-0.1033 to 0.4373	No	ns	0.6746
													JAM1:AN-High vs. GP59:O-High	1.159	0.9612 to 1.357	Yes	****	<0.0001
													JAM1:AN-High vs. GP59:ON-High	0.889	0.6912 to 1.087	Yes	****	<0.0001
													JAM1:AN-High vs. GP59:AN-High	1.037	0.8366 to 1.237	Yes	****	<0.0001
													GP59:O Low vs. GP59:ON Low	0.041	-0.2194 to 0.3014	No	ns	>0.9999
													GP59:O Low vs. GP59:AN Low	-1.107	-1.398 to -0.8159	Yes	****	<0.0001
													GP59:O Low vs. GP59:O-High	-0.115	-0.3405 to 0.1105	No	ns	0.8798
													GP59:O Low vs. GP59:ON-High	-0.385	-0.6105 to -0.1595	Yes	****	<0.0001
													GP59:O Low vs. GP59:AN-High	-0.237	-0.4647 to -0.009286	Yes	*	0.0329
													GP59:ON Low vs. GP59:AN Low	-1.148	-1.439 to -0.8569	Yes	****	<0.0001
													GP59:ON Low vs. GP59:O-High	-0.156	-0.3815 to 0.06951	No	ns	0.4996
													GP59:ON Low vs. GP59:ON-High	-0.426	-0.6515 to -0.2005	Yes	****	<0.0001
													GP59:ON Low vs. GP59:AN-High	-0.278	-0.5057 to -0.05029	Yes	**	0.004
													GP59:AN Low vs. GP59:O-High	0.992	0.7316 to 1.252	Yes	****	<0.0001
													GP59:AN Low vs. GP59:ON-High	0.722	0.4616 to 0.9824	Yes	****	<0.0001
													GP59:AN Low vs. GP59:AN-High	0.87	0.6077 to 1.132	Yes	****	<0.0001
													GP59:O-High vs. GP59:ON-High	-0.27	-0.4541 to -0.08587	Yes	***	0.0001
													GP59:O-High vs. GP59:AN-High	-0.122	-0.3088 to 0.06482	No	ns	0.5922
													GP59:ON-High vs. GP59:AN-High	0.148	-0.03882 to 0.3348	No	ns	0.2824
													Test details	Predicted (LS) mean 1	Predicted (LS) mean 2	Predicted (LS) mean diff.	SE of diff.	N1	N2	q	DF
													JAM1:O Low vs. JAM1:ON Low	1.11	0.605	0.505	0.07937	36	36	8.998	603
													JAM1:O Low vs. JAM1:AN Low	1.11	0.777	0.333	0.07937	36	36	5.934	603
													JAM1:O Low vs. JAM1:O-High	1.11	1.068	0.042	0.06873	36	72	0.8642	603
													JAM1:O Low vs. JAM1:ON-High	1.11	1.046	0.064	0.06873	36	72	1.317	603
													JAM1:O Low vs. JAM1:AN-High	1.11	1.965	-0.855	0.07219	36	55	16.75	603
													JAM1:O Low vs. GP59:O Low	1.11	0.691	0.419	0.07937	36	36	7.466	603
													JAM1:O Low vs. GP59:ON Low	1.11	0.65	0.46	0.07937	36	36	8.197	603
													JAM1:O Low vs. GP59:AN Low	1.11	1.798	-0.688	0.08873	36	24	10.97	603
													JAM1:O Low vs. GP59:O-High	1.11	0.806	0.304	0.06873	36	72	6.255	603
													JAM1:O Low vs. GP59:ON-High	1.11	1.076	0.034	0.06873	36	72	0.6996	603
													JAM1:O Low vs. GP59:AN-High	1.11	0.928	0.182	0.0694	36	68	3.709	603
													JAM1:ON Low vs. JAM1:AN Low	0.605	0.777	-0.172	0.07937	36	36	3.065	603
													JAM1:ON Low vs. JAM1:O-High	0.605	1.068	-0.463	0.06873	36	72	9.526	603
													JAM1:ON Low vs. JAM1:ON-High	0.605	1.046	-0.441	0.06873	36	72	9.074	603
													JAM1:ON Low vs. JAM1:AN-High	0.605	1.965	-1.36	0.07219	36	55	26.64	603
													JAM1:ON Low vs. GP59:O Low	0.605	0.691	-0.086	0.07937	36	36	1.532	603
													JAM1:ON Low vs. GP59:ON Low	0.605	0.65	-0.045	0.07937	36	36	0.8018	603
													JAM1:ON Low vs. GP59:AN Low	0.605	1.798	-1.193	0.08873	36	24	19.01	603
													JAM1:ON Low vs. GP59:O-High	0.605	0.806	-0.201	0.06873	36	72	4.136	603
													JAM1:ON Low vs. GP59:ON-High	0.605	1.076	-0.471	0.06873	36	72	9.691	603
													JAM1:ON Low vs. GP59:AN-High	0.605	0.928	-0.323	0.0694	36	68	6.582	603
													JAM1:AN Low vs. JAM1:O-High	0.777	1.068	-0.291	0.06873	36	72	5.987	603
													JAM1:AN Low vs. JAM1:ON-High	0.777	1.046	-0.269	0.06873	36	72	5.535	603
													JAM1:AN Low vs. JAM1:AN-High	0.777	1.965	-1.188	0.07219	36	55	23.27	603
													JAM1:AN Low vs. GP59:O Low	0.777	0.691	0.086	0.07937	36	36	1.532	603
													JAM1:AN Low vs. GP59:ON Low	0.777	0.65	0.127	0.07937	36	36	2.263	603
													JAM1:AN Low vs. GP59:AN Low	0.777	1.798	-1.021	0.08873	36	24	16.27	603
													JAM1:AN Low vs. GP59:O-High	0.777	0.806	-0.029	0.06873	36	72	0.5967	603
													JAM1:AN Low vs. GP59:ON-High	0.777	1.076	-0.299	0.06873	36	72	6.152	603
													JAM1:AN Low vs. GP59:AN-High	0.777	0.928	-0.151	0.0694	36	68	3.077	603
													JAM1:O-High vs. JAM1:ON-High	1.068	1.046	0.022	0.05612	72	72	0.5544	603
													JAM1:O-High vs. JAM1:AN-High	1.068	1.965	-0.897	0.0603	72	55	21.04	603
													JAM1:O-High vs. GP59:O Low	1.068	0.691	0.377	0.06873	72	36	7.757	603
													JAM1:O-High vs. GP59:ON Low	1.068	0.65	0.418	0.06873	72	36	8.6	603
													JAM1:O-High vs. GP59:AN Low	1.068	1.798	-0.73	0.07937	72	24	13.01	603
													JAM1:O-High vs. GP59:O-High	1.068	0.806	0.262	0.05612	72	72	6.602	603
													JAM1:O-High vs. GP59:ON-High	1.068	1.076	-0.008	0.05612	72	72	0.2016	603
													JAM1:O-High vs. GP59:AN-High	1.068	0.928	0.14	0.05694	72	68	3.477	603
													JAM1:ON-High vs. JAM1:AN-High	1.046	1.965	-0.919	0.0603	72	55	21.55	603
													JAM1:ON-High vs. GP59:O Low	1.046	0.691	0.355	0.06873	72	36	7.304	603
													JAM1:ON-High vs. GP59:ON Low	1.046	0.65	0.396	0.06873	72	36	8.148	603
													JAM1:ON-High vs. GP59:AN Low	1.046	1.798	-0.752	0.07937	72	24	13.4	603
													JAM1:ON-High vs. GP59:O-High	1.046	0.806	0.24	0.05612	72	72	6.048	603
													JAM1:ON-High vs. GP59:ON-High	1.046	1.076	-0.03	0.05612	72	72	0.756	603
													JAM1:ON-High vs. GP59:AN-High	1.046	0.928	0.118	0.05694	72	68	2.931	603
													JAM1:AN-High vs. GP59:O Low	1.965	0.691	1.274	0.07219	55	36	24.96	603
													JAM1:AN-High vs. GP59:ON Low	1.965	0.65	1.315	0.07219	55	36	25.76	603
													JAM1:AN-High vs. GP59:AN Low	1.965	1.798	0.167	0.08238	55	24	2.867	603
													JAM1:AN-High vs. GP59:O-High	1.965	0.806	1.159	0.0603	55	72	27.18	603
													JAM1:AN-High vs. GP59:ON-High	1.965	1.076	0.889	0.0603	55	72	20.85	603
													JAM1:AN-High vs. GP59:AN-High	1.965	0.928	1.037	0.06106	55	68	24.02	603
													GP59:O Low vs. GP59:ON Low	0.691	0.65	0.041	0.07937	36	36	0.7306	603
													GP59:O Low vs. GP59:AN Low	0.691	1.798	-1.107	0.08873	36	24	17.64	603
													GP59:O Low vs. GP59:O-High	0.691	0.806	-0.115	0.06873	36	72	2.366	603
													GP59:O Low vs. GP59:ON-High	0.691	1.076	-0.385	0.06873	36	72	7.921	603
													GP59:O Low vs. GP59:AN-High	0.691	0.928	-0.237	0.0694	36	68	4.829	603
													GP59:ON Low vs. GP59:AN Low	0.65	1.798	-1.148	0.08873	36	24	18.3	603
													GP59:ON Low vs. GP59:O-High	0.65	0.806	-0.156	0.06873	36	72	3.21	603
													GP59:ON Low vs. GP59:ON-High	0.65	1.076	-0.426	0.06873	36	72	8.765	603
													GP59:ON Low vs. GP59:AN-High	0.65	0.928	-0.278	0.0694	36	68	5.665	603
													GP59:AN Low vs. GP59:O-High	1.798	0.806	0.992	0.07937	24	72	17.68	603
													GP59:AN Low vs. GP59:ON-High	1.798	1.076	0.722	0.07937	24	72	12.87	603
													GP59:AN Low vs. GP59:AN-High	1.798	0.928	0.87	0.07995	24	68	15.39	603
													GP59:O-High vs. GP59:ON-High	0.806	1.076	-0.27	0.05612	72	72	6.804	603
													GP59:O-High vs. GP59:AN-High	0.806	0.928	-0.122	0.05694	72	68	3.03	603
													GP59:ON-High vs. GP59:AN-High	1.076	0.928	0.148	0.05694	72	68	3.676	603
													Compact letter display
													JAM1:AN-High	A
													GP59:AN Low	A
													JAM1:O Low	B
													GP59:ON-High	B
													JAM1:O-High	B
													JAM1:ON-High	B
													GP59:AN-High	B C
													GP59:O-High	C D
													JAM1:AN Low	C D
													GP59:O Low	D
													GP59:ON Low	D
													JAM1:ON Low	D

## Sheet: narXL
Low						High
JAM1	JAM1	JAM1	GP59	GP59	GP59	JAM1	JAM1	JAM1	GP59	GP59	GP59
O	ON	AN	O	ON	AN	O	ON	AN	O	ON	AN
0.982	0.505	0.651	0.656	1.019	1.664	0.672	1.191	1.081	1.018	1.211	1.362		Table Analyzed	narXL
0.993	0.627	0.656	0.63	1.085	1.629	1.234	0.993	1.483	1.022	1.146	1.446
1.055	0.348	0.601	0.736	1.013	1.688	1.221	1.169	1.134	1.292	1.219	1.31		Two-way ANOVA	Ordinary
1.053	0.515	0.605	0.709	1.078	1.653	1.235	1.16	0.808	0.904	1.062	1.394		Alpha	0.05
1.06	0.59	0.588	0.614	1.028	1.765	1.108	1.173	1	1.014	1.013	1.345
1.133	0.377	0.687	0.623	1.035	1.827	1.141	1.045	1.061	1.003	1.045	1.381		Source of Variation	% of total variation	P value	P value summary	Significant?
0.978	0.507	0.537	0.693	1.022	1.788	0.722	1.225	1.468	1.016	1.27	1.293		Interaction	18.01	<0.0001	****	Yes
0.944	0.574	0.636	0.702	1.029	1.851	1.261	1.008	1.161	1.008	1.145	1.329		Row Factor	1.222	<0.0001	****	Yes
1.064	0.481	1.301	1.127	1.462	1.752	1.302	1.182	0.964	1.499	1.247	1.473		Column Factor	21.27	<0.0001	****	Yes
1.049	0.516	1.384	1.146	1.422	1.794	1.269	1.183	1.061	0.903	1.1	1.558
1.011	0.537	1.251	1.206	1.457	1.688	1.142	1.225	1.155	1.034	1.05	1.422		ANOVA table	SS (Type III)	DF	MS	F (DFn, DFd)	P value
1.142	0.511	1.334	1.225	1.416	1.731	1.059	0.89	1.509	1.026	1.074	1.506		Interaction	42.73	5	8.546	F (5, 1155) = 66.99	P<0.0001
1.142	0.616	0.562	0.589	0.814	2.055	1.074	1.206	1.222	1.032	1.154	0.98		Row Factor	2.899	1	2.899	F (1, 1155) = 22.73	P<0.0001
1.121	0.654	0.59	0.591	0.849	2.122	1.141	1.031	0.827	1.03	1.198	1.037		Column Factor	50.45	5	10.09	F (5, 1155) = 79.11	P<0.0001
1.143	0.425	0.522	0.677	0.852	1.991	1.177	1.194	1.092	1.242	1.195	1.034		Residual	147.3	1155	0.1276
1.125	0.671	0.55	0.679	0.888	2.058	1.17	1.172	1.135	0.845	1.04	1.091
1.226	0.744	0.703	0.606	1.029	1.812	1.152	1.155	1.493	0.933	1	1.385		Difference between row means
1.114	0.403	0.784	0.605	0.975	1.772	1.116	1.047	1.25	1.028	0.983	1.391		Predicted (LS) mean of JAM1	1.314
1.138	0.617	0.664	0.695	1.068	1.864	1.124	1.24	0.984	1.03	1.213	1.44		Predicted (LS) mean of GP59	1.419
1.073	0.601	0.744	0.694	1.014	1.823	1.168	1.046	1.154	1.016	1.197	1.446		Difference between predicted means	-0.1057
1.152	0.559	1.33	1.091	1.2	1.691	1.258	1.207	1.663	1.448	1.224	1.745		SE of difference	0.02216
1.121	0.672	1.355	1.102	1.211	1.723	1.204	1.195	1.601	0.843	1.078	1.899		95% CI of difference	-0.1492 to -0.06218
1.177	0.691	1.29	1.179	1.238	1.742	1.186	1.207	1.527	0.954	1.037	1.799
1.123	0.538	1.315	1.19	1.249	1.775	1.035	0.892	1.52	1.051	1.011	1.953		Data summary
1.249	0.916	0.851	0.736	0.959		0.542	1.32	1.082	1.13	1.571	0.769		Number of columns (Column Factor)	6
1.352	0.968	0.926	0.76	0.96		0.968	1.289	1.668	1.007	1.368	0.816		Number of rows (Row Factor)	2
1.309	0.884	0.766	0.763	0.945		1.037	1.158	1.549	1.217	1.28	0.801		Number of values	1167
1.212	0.968	0.841	0.787	0.946		1.171	1.103	1.5	0.725	0.952	0.848
1.51	1.036	1.166	0.677	1.063		1.125	1.169	1.37	0.846	0.803	1.78
1.33	0.924	1.214	0.656	1.153		1.164	1.3	1.189	1.093	0.891	1.92
1.245	0.916	1.082	0.704	1.05		0.509	1.25	1.737	0.992	1.618	1.812		Compare cell means regardless of rows and columns
1.303	0.914	1.13	0.683	1.14		0.962	1.177	1.664	1.266	1.384	1.952
1.318	1.017	1.687	1.426	1.292		1.044	1.067	1.615	0.732	1.334	0.782		Number of families	1
1.208	0.969	1.71	1.373	1.412		1.192	0.832	1.539	0.801	0.959	0.804		Number of comparisons per family	66
1.461	0.983	1.603	1.453	1.279		1.136	1.335	1.174	1.143	0.821	0.89		Alpha	0.05
1.339	1.058	1.626	1.401	1.398		1.132	1.327	1.742	1.015	0.892	0.912
						0.943	1.182	1.613	1.166	1.514	0.736		Tukey's multiple comparisons test	Predicted (LS) mean diff.	95.00% CI of diff.	Below threshold?	Summary	Adjusted P Value
1.133	0.74	0.93	0.982	1.129	2.127	0.874	1.116	1.589	0.666	1.42	0.717
1.204	0.75	0.935	0.957	1.195	2.091	0.993	1.152	1.389	0.765	1.256	0.843		JAM1:O Low vs. JAM1:ON Low	0.4	0.2051 to 0.5949	Yes	****	<0.0001
1.173	0.769	0.852	0.952	1.07	2.052	1.106	1.314	1.282	1.106	0.929	0.825		JAM1:O Low vs. JAM1:AN Low	0.147	-0.05078 to 0.3448	No	ns	0.3838
1.244	0.778	0.857	0.926	1.136	2.016	1.168	1.288	1.692	1	0.79	0.941		JAM1:O Low vs. JAM1:O-High	-0.216	-0.3863 to -0.04575	Yes	**	0.0021
1.293	0.851	0.867	0.94	1.138	2.227	1.14	1.201	1.866	1.215	0.829	0.917		JAM1:O Low vs. JAM1:ON-High	-0.23	-0.4036 to -0.05644	Yes	***	0.0009
1.276	0.907	0.967	0.949	1.145	2.29	0.911	1.079	1.463	0.672	1.561	1.049		JAM1:O Low vs. JAM1:AN-High	-0.615	-0.7926 to -0.4374	Yes	****	<0.0001
1.333	0.879	0.789	0.91	1.08	2.152	0.869	0.815	1.569	0.721	1.436	1.024		JAM1:O Low vs. GP59:O Low	0.265	0.07007 to 0.4599	Yes	***	0.0006
1.316	0.934	0.888	0.919	1.086	2.215	1	1.888	1.765	1.663	1.311	1.074		JAM1:O Low vs. GP59:ON Low	0.025	-0.1699 to 0.2199	No	ns	>0.9999
1.4	1.151	1.581	1.453	1.573	2.083	1.127	1.931	1.891	1.724	0.936	1.1		JAM1:O Low vs. GP59:AN Low	-0.742	-0.9599 to -0.5241	Yes	****	<0.0001
1.363	1.203	1.664	1.472	1.532	2.125	1.18	1.782	1.552	1.409	0.808	1.005		JAM1:O Low vs. GP59:O-High	-0.232	-0.4064 to -0.05764	Yes	***	0.0009
1.44	1.179	1.502	1.423	1.514	2.073	1.108	1.586	1.589	1.558	0.829	1.031		JAM1:O Low vs. GP59:ON-High	-0.309	-0.4784 to -0.1396	Yes	****	<0.0001
1.403	1.231	1.585	1.442	1.474	2.115	1.526	1.304	1.694	1.278	2.106	0.822		JAM1:O Low vs. GP59:AN-High	-0.155	-0.3261 to 0.01613	No	ns	0.12
1.126	0.88	0.919	0.849	1.078	2.386	1.779	1.852	1.843	1.694	1.997	0.782		JAM1:ON Low vs. JAM1:AN Low	-0.253	-0.4508 to -0.05522	Yes	**	0.0018
1.193	0.843	0.946	0.851	1.113	2.453	1.602	1.83	1.35	1.726	2.037	0.754		JAM1:ON Low vs. JAM1:O-High	-0.616	-0.7863 to -0.4457	Yes	****	<0.0001
1.081	0.815	0.872	0.803	1.058	2.376	1.76	1.74	1.768	1.47	1.548	0.714		JAM1:ON Low vs. JAM1:ON-High	-0.63	-0.8036 to -0.4564	Yes	****	<0.0001
1.148	0.777	0.9	0.806	1.094	2.443	1.743	1.64	1.868	1.589	1.459	1.298		JAM1:ON Low vs. JAM1:AN-High	-1.015	-1.193 to -0.8374	Yes	****	<0.0001
1.254	0.907	1.06	0.866	1.293	2.101	1.879	1.313	1.369	1.25	1.641	1.284		JAM1:ON Low vs. GP59:O Low	-0.135	-0.3299 to 0.05993	No	ns	0.5003
1.359	0.997	1.141	0.866	1.239	2.061	1.259	1.926		1.677	2.125	1.229		JAM1:ON Low vs. GP59:ON Low	-0.375	-0.5699 to -0.1801	Yes	****	<0.0001
1.209	0.842	1.014	0.82	1.274	2.049	1.753	1.955		1.732	2.064	1.216		JAM1:ON Low vs. GP59:AN Low	-1.142	-1.360 to -0.9241	Yes	****	<0.0001
1.314	0.931	1.093	0.82	1.22	2.008	1.67	1.794		1.35	2.056	0.943		JAM1:ON Low vs. GP59:O-High	-0.632	-0.8064 to -0.4576	Yes	****	<0.0001
1.485	1.22	1.687	1.351	1.464	1.98	1.655	1.569		1.477	1.511	0.892		JAM1:ON Low vs. GP59:ON-High	-0.709	-0.8784 to -0.5396	Yes	****	<0.0001
1.643	1.289	1.711	1.362	1.474	2.012	1.599	1.306		1.303	1.413	0.825		JAM1:ON Low vs. GP59:AN-High	-0.555	-0.7261 to -0.3839	Yes	****	<0.0001
1.44	1.155	1.64	1.305	1.445	1.928	1.842	1.891		1.707	1.581	0.775		JAM1:AN Low vs. JAM1:O-High	-0.363	-0.5365 to -0.1895	Yes	****	<0.0001
1.598	1.223	1.665	1.316	1.455	1.96	1.928	1.854		1.734	2.049	1.316		JAM1:AN Low vs. JAM1:ON-High	-0.377	-0.5537 to -0.2003	Yes	****	<0.0001
1.13	0.775	1.109	0.881	1.194		1.685	1.753		1.41	2.05	1.455		JAM1:AN Low vs. JAM1:AN-High	-0.762	-0.9427 to -0.5813	Yes	****	<0.0001
1.208	0.805	1.184	0.906	1.195		1.558	1.623		1.509	2.013	1.199		JAM1:AN Low vs. GP59:O Low	0.118	-0.07978 to 0.3158	No	ns	0.7247
1.125	0.727	1.068	0.843	1.164		1.696	1.316		1.275	1.525	1.337		JAM1:AN Low vs. GP59:ON Low	-0.122	-0.3198 to 0.07578	No	ns	0.6797
1.202	0.756	1.143	0.868	1.165		1.787				1.446	1.253		JAM1:AN Low vs. GP59:AN Low	-0.889	-1.109 to -0.6685	Yes	****	<0.0001
1.219	0.852	1.424	0.823	1.299		1.855				1.579	1.397		JAM1:AN Low vs. GP59:O-High	-0.379	-0.5565 to -0.2015	Yes	****	<0.0001
1.189	0.831	1.472	0.802	1.388		1.661				2.068	1.135		JAM1:AN Low vs. GP59:ON-High	-0.456	-0.6287 to -0.2833	Yes	****	<0.0001
1.213	0.803	1.384	0.785	1.269		1.659				2.116	1.28		JAM1:AN Low vs. GP59:AN-High	-0.302	-0.4764 to -0.1276	Yes	****	<0.0001
1.183	0.782	1.431	0.763	1.359		1.626				2.033			JAM1:O-High vs. JAM1:ON-High	-0.014	-0.1593 to 0.1313	No	ns	>0.9999
1.385	1.311		1.572	1.528		1.59				1.488			JAM1:O-High vs. JAM1:AN-High	-0.399	-0.5491 to -0.2489	Yes	****	<0.0001
1.405	1.352		1.519	1.647		1.643				1.4			JAM1:O-High vs. GP59:O Low	0.481	0.3107 to 0.6513	Yes	****	<0.0001
1.379	1.262		1.534	1.497		1.818				1.519			JAM1:O-High vs. GP59:ON Low	0.241	0.07075 to 0.4113	Yes	***	0.0002
1.399	1.303		1.481	1.617									JAM1:O-High vs. GP59:AN Low	-0.526	-0.7222 to -0.3298	Yes	****	<0.0001
						1.416	1.426	1.909	1.459	1.455	1.484		JAM1:O-High vs. GP59:O-High	-0.016	-0.1622 to 0.1302	No	ns	>0.9999
						1.466	1.459	1.889	1.457	1.514	1.568		JAM1:O-High vs. GP59:ON-High	-0.093	-0.2333 to 0.04731	No	ns	0.5715
						1.379	1.331	1.936	1.446	1.441	1.468		JAM1:O-High vs. GP59:AN-High	0.061	-0.08138 to 0.2034	No	ns	0.963
						1.429	1.365	1.917	1.444	1.5	1.552		JAM1:ON-High vs. JAM1:AN-High	-0.385	-0.5389 to -0.2311	Yes	****	<0.0001
						1.285	1.554	2.491	1.571	1.815	1.467		JAM1:ON-High vs. GP59:O Low	0.495	0.3214 to 0.6686	Yes	****	<0.0001
						1.253	1.534	2.496	1.534	1.862	1.503		JAM1:ON-High vs. GP59:ON Low	0.255	0.08144 to 0.4286	Yes	***	0.0001
						1.248	1.46	2.519	1.558	1.801	1.451		JAM1:ON-High vs. GP59:AN Low	-0.512	-0.7111 to -0.3129	Yes	****	<0.0001
						1.216	1.439	2.524	1.521	1.848	1.487		JAM1:ON-High vs. GP59:O-High	-0.002	-0.1521 to 0.1481	No	ns	>0.9999
						1.966	2.144	2.52	2.104	2.35	1.595		JAM1:ON-High vs. GP59:ON-High	-0.079	-0.2233 to 0.06530	No	ns	0.822
						2.003	2.083	2.522	2.135	2.369	1.68		JAM1:ON-High vs. GP59:AN-High	0.075	-0.07131 to 0.2213	No	ns	0.8778
						1.602	1.232	2.547	2.091	2.336	1.579		JAM1:AN-High vs. GP59:O Low	0.88	0.7024 to 1.058	Yes	****	<0.0001
						1.629	1.247	2.55	2.122	2.355	1.664		JAM1:AN-High vs. GP59:ON Low	0.64	0.4624 to 0.8176	Yes	****	<0.0001
						1.582	1.216	1.957	1.554	1.479	1.225		JAM1:AN-High vs. GP59:AN Low	-0.127	-0.3296 to 0.07561	No	ns	0.6568
						1.609	1.231	1.942	1.54	1.477	1.282		JAM1:AN-High vs. GP59:O-High	0.383	0.2282 to 0.5378	Yes	****	<0.0001
						1.336	1.529	1.905	1.56	1.486	1.121		JAM1:AN-High vs. GP59:ON-High	0.306	0.1568 to 0.4552	Yes	****	<0.0001
						1.33	1.49	1.89	1.546	1.485	1.178		JAM1:AN-High vs. GP59:AN-High	0.46	0.3089 to 0.6111	Yes	****	<0.0001
						1.316	1.513	2.689	1.539	1.7	1.631		GP59:O Low vs. GP59:ON Low	-0.24	-0.4349 to -0.04507	Yes	**	0.0034
						1.31	1.473	2.637	1.524	1.716	1.637		GP59:O Low vs. GP59:AN Low	-1.007	-1.225 to -0.7891	Yes	****	<0.0001
						2.147	2.127	2.637	1.545	1.708	1.526		GP59:O Low vs. GP59:O-High	-0.497	-0.6714 to -0.3226	Yes	****	<0.0001
						2.121	2.092	2.585	1.531	1.724	1.532		GP59:O Low vs. GP59:ON-High	-0.574	-0.7434 to -0.4046	Yes	****	<0.0001
						2.127	2.111	2.34	2.256	2.33	1.99		GP59:O Low vs. GP59:AN-High	-0.42	-0.5911 to -0.2489	Yes	****	<0.0001
						2.101	2.076	2.317	2.257	2.397	1.886		GP59:ON Low vs. GP59:AN Low	-0.767	-0.9849 to -0.5491	Yes	****	<0.0001
						1.525	1.429	2.288	2.262	2.338	2.04		GP59:ON Low vs. GP59:O-High	-0.257	-0.4314 to -0.08264	Yes	****	<0.0001
						1.606	1.442	2.265	2.264	2.405	1.021		GP59:ON Low vs. GP59:ON-High	-0.334	-0.5034 to -0.1646	Yes	****	<0.0001
						1.501	1.417	2.234	1.627	1.492	1.068		GP59:ON Low vs. GP59:AN-High	-0.18	-0.3511 to -0.008870	Yes	*	0.0292
						1.582	1.43	2.183	1.834	1.521	0.998		GP59:AN Low vs. GP59:O-High	0.51	0.3103 to 0.7097	Yes	****	<0.0001
						1.341	1.417	2.282	1.597	1.485	1.046		GP59:AN Low vs. GP59:ON-High	0.433	0.2375 to 0.6285	Yes	****	<0.0001
						1.348	1.436	2.231	1.804	1.514	2.032		GP59:AN Low vs. GP59:AN-High	0.587	0.3901 to 0.7839	Yes	****	<0.0001
						1.317	1.405	2.605	1.552	1.553	2.009		GP59:O-High vs. GP59:ON-High	-0.077	-0.2223 to 0.06827	No	ns	0.8513
						1.324	1.424	2.559	1.601	1.608	1.534		GP59:O-High vs. GP59:AN-High	0.077	-0.07026 to 0.2243	No	ns	0.8626
						1.906	2.089	2.653	1.522	1.546	1.556		GP59:ON-High vs. GP59:AN-High	0.154	0.01262 to 0.2954	Yes	*	0.0193
						1.974	2.077	2.607	1.571	1.601	1.5
						1.883	1.651	1.888	2.175	2.31	1.522
						1.95	1.675	1.916	2.223	2.33	1.487		Test details	Predicted (LS) mean 1	Predicted (LS) mean 2	Predicted (LS) mean diff.	SE of diff.	N1	N2	q	DF
						1.658	1.618	2.184	2.146	2.303	1.469
						1.692	1.642	2.212	2.193	2.323	1.453		JAM1:O Low vs. JAM1:ON Low	1.228	0.828	0.4	0.05953	72	72	9.503	1155
						1.586	1.595	2.281	1.474	1.439	1.435		JAM1:O Low vs. JAM1:AN Low	1.228	1.081	0.147	0.0604	72	68	3.442	1155
						1.621	1.558	2.254	1.494	1.477	1.693		JAM1:O Low vs. JAM1:O-High	1.228	1.444	-0.216	0.05199	72	137	5.876	1155
						1.594	1.562	2.577	1.41	1.473	1.669		JAM1:O Low vs. JAM1:ON-High	1.228	1.458	-0.23	0.053	72	123	6.137	1155
						1.616	1.525	2.55	1.43	1.511	1.659		JAM1:O Low vs. JAM1:AN-High	1.228	1.843	-0.615	0.05424	72	109	16.04	1155
						1.522	1.749	2.218	1.782	1.329	1.634		JAM1:O Low vs. GP59:O Low	1.228	0.963	0.265	0.05953	72	72	6.296	1155
						1.544	1.801	2.514	1.843	1.335	1.772		JAM1:O Low vs. GP59:ON Low	1.228	1.203	0.025	0.05953	72	72	0.5939	1155
						2.078	1.679	1.708	1.77	1.363	1.799		JAM1:O Low vs. GP59:AN Low	1.228	1.97	-0.742	0.06655	72	48	15.77	1155
						2.112	1.731	1.705	1.831	1.369	1.725		JAM1:O Low vs. GP59:O-High	1.228	1.46	-0.232	0.05324	72	120	6.162	1155
						2.006	1.745	1.76	2.017	1.924	1.751		JAM1:O Low vs. GP59:ON-High	1.228	1.537	-0.309	0.05173	72	141	8.447	1155
						1.48	1.408	1.916	2.049	1.888	1.521		JAM1:O Low vs. GP59:AN-High	1.228	1.383	-0.155	0.05226	72	133	4.195	1155
						1.514	1.676	1.738	1.954	1.958	1.481		JAM1:ON Low vs. JAM1:AN Low	0.828	1.081	-0.253	0.0604	72	68	5.924	1155
						1.474	1.339	2.471	1.985	1.922	1.473		JAM1:ON Low vs. JAM1:O-High	0.828	1.444	-0.616	0.05199	72	137	16.76	1155
						1.508	2.163	2.321	1.797	1.399	1.434		JAM1:ON Low vs. JAM1:ON-High	0.828	1.458	-0.63	0.053	72	123	16.81	1155
						1.496	2.093	2.294	1.82	1.436	1.996		JAM1:ON Low vs. JAM1:AN-High	0.828	1.843	-1.015	0.05424	72	109	26.46	1155
						1.507	2.147	2.144	1.816	1.304	1.983		JAM1:ON Low vs. GP59:O Low	0.828	0.963	-0.135	0.05953	72	72	3.207	1155
						1.491	1.426	2.521	1.839	1.341	1.949		JAM1:ON Low vs. GP59:ON Low	0.828	1.203	-0.375	0.05953	72	72	8.909	1155
						1.502	1.271	2.301	2.072	1.845	1.935		JAM1:ON Low vs. GP59:AN Low	0.828	1.97	-1.142	0.06655	72	48	24.27	1155
						2.115	1.376	2.343	2.044	1.799	1.406		JAM1:ON Low vs. GP59:O-High	0.828	1.46	-0.632	0.05324	72	120	16.79	1155
						1.971	1.221	2.124	2.091	1.749	1.355		JAM1:ON Low vs. GP59:ON-High	0.828	1.537	-0.709	0.05173	72	141	19.38	1155
						2.109	1.684		2.063	1.703	1.311		JAM1:ON Low vs. GP59:AN-High	0.828	1.383	-0.555	0.05226	72	133	15.02	1155
						1.965	1.694			1.502	1.26		JAM1:AN Low vs. JAM1:O-High	1.081	1.444	-0.363	0.05298	68	137	9.689	1155
						1.571	1.635			1.53	1.78		JAM1:AN Low vs. JAM1:ON-High	1.081	1.458	-0.377	0.05397	68	123	9.878	1155
						1.49	1.645			1.543	1.918		JAM1:AN Low vs. JAM1:AN-High	1.081	1.843	-0.762	0.05519	68	109	19.53	1155
						1.569				1.571	1.684		JAM1:AN Low vs. GP59:O Low	1.081	0.963	0.118	0.0604	68	72	2.763	1155
						1.487				1.348	1.823		JAM1:AN Low vs. GP59:ON Low	1.081	1.203	-0.122	0.0604	68	72	2.857	1155
						1.595				1.348	1.716		JAM1:AN Low vs. GP59:AN Low	1.081	1.97	-0.889	0.06733	68	48	18.67	1155
						1.563				1.388	1.861		JAM1:AN Low vs. GP59:O-High	1.081	1.46	-0.379	0.05421	68	120	9.887	1155
						1.593				1.389	1.62		JAM1:AN Low vs. GP59:ON-High	1.081	1.537	-0.456	0.05273	68	141	12.23	1155
						1.56				2.097	1.765		JAM1:AN Low vs. GP59:AN-High	1.081	1.383	-0.302	0.05324	68	133	8.021	1155
										2.038			JAM1:O-High vs. JAM1:ON-High	1.444	1.458	-0.014	0.04436	137	123	0.4463	1155
										2.138			JAM1:O-High vs. JAM1:AN-High	1.444	1.843	-0.399	0.04584	137	109	12.31	1155
										2.079			JAM1:O-High vs. GP59:O Low	1.444	0.963	0.481	0.05199	137	72	13.08	1155
													JAM1:O-High vs. GP59:ON Low	1.444	1.203	0.241	0.05199	137	72	6.556	1155
													JAM1:O-High vs. GP59:AN Low	1.444	1.97	-0.526	0.05991	137	48	12.42	1155
													JAM1:O-High vs. GP59:O-High	1.444	1.46	-0.016	0.04466	137	120	0.5067	1155
													JAM1:O-High vs. GP59:ON-High	1.444	1.537	-0.093	0.04285	137	141	3.07	1155
													JAM1:O-High vs. GP59:AN-High	1.444	1.383	0.061	0.04348	137	133	1.984	1155
													JAM1:ON-High vs. JAM1:AN-High	1.458	1.843	-0.385	0.04698	123	109	11.59	1155
													JAM1:ON-High vs. GP59:O Low	1.458	0.963	0.495	0.053	123	72	13.21	1155
													JAM1:ON-High vs. GP59:ON Low	1.458	1.203	0.255	0.053	123	72	6.805	1155
													JAM1:ON-High vs. GP59:AN Low	1.458	1.97	-0.512	0.06078	123	48	11.91	1155
													JAM1:ON-High vs. GP59:O-High	1.458	1.46	-0.002	0.04583	123	120	0.06172	1155
													JAM1:ON-High vs. GP59:ON-High	1.458	1.537	-0.079	0.04407	123	141	2.535	1155
													JAM1:ON-High vs. GP59:AN-High	1.458	1.383	0.075	0.04468	123	133	2.374	1155
													JAM1:AN-High vs. GP59:O Low	1.843	0.963	0.88	0.05424	109	72	22.94	1155
													JAM1:AN-High vs. GP59:ON Low	1.843	1.203	0.64	0.05424	109	72	16.69	1155
													JAM1:AN-High vs. GP59:AN Low	1.843	1.97	-0.127	0.06187	109	48	2.903	1155
													JAM1:AN-High vs. GP59:O-High	1.843	1.46	0.383	0.04726	109	120	11.46	1155
													JAM1:AN-High vs. GP59:ON-High	1.843	1.537	0.306	0.04555	109	141	9.5	1155
													JAM1:AN-High vs. GP59:AN-High	1.843	1.383	0.46	0.04615	109	133	14.1	1155
													GP59:O Low vs. GP59:ON Low	0.963	1.203	-0.24	0.05953	72	72	5.702	1155
													GP59:O Low vs. GP59:AN Low	0.963	1.97	-1.007	0.06655	72	48	21.4	1155
													GP59:O Low vs. GP59:O-High	0.963	1.46	-0.497	0.05324	72	120	13.2	1155
													GP59:O Low vs. GP59:ON-High	0.963	1.537	-0.574	0.05173	72	141	15.69	1155
													GP59:O Low vs. GP59:AN-High	0.963	1.383	-0.42	0.05226	72	133	11.37	1155
													GP59:ON Low vs. GP59:AN Low	1.203	1.97	-0.767	0.06655	72	48	16.3	1155
													GP59:ON Low vs. GP59:O-High	1.203	1.46	-0.257	0.05324	72	120	6.826	1155
													GP59:ON Low vs. GP59:ON-High	1.203	1.537	-0.334	0.05173	72	141	9.13	1155
													GP59:ON Low vs. GP59:AN-High	1.203	1.383	-0.18	0.05226	72	133	4.871	1155
													GP59:AN Low vs. GP59:O-High	1.97	1.46	0.51	0.061	48	120	11.82	1155
													GP59:AN Low vs. GP59:ON-High	1.97	1.537	0.433	0.05968	48	141	10.26	1155
													GP59:AN Low vs. GP59:AN-High	1.97	1.383	0.587	0.06014	48	133	13.8	1155
													GP59:O-High vs. GP59:ON-High	1.46	1.537	-0.077	0.04436	120	141	2.455	1155
													GP59:O-High vs. GP59:AN-High	1.46	1.383	0.077	0.04497	120	133	2.422	1155
													GP59:ON-High vs. GP59:AN-High	1.537	1.383	0.154	0.04317	141	133	5.045	1155
													Compact letter display
													GP59:AN Low	A
													JAM1:AN-High	A
													GP59:ON-High	B
													GP59:O-High	B C
													JAM1:ON-High	B C
													JAM1:O-High	B C
													GP59:AN-High	C D
													JAM1:O Low	D E
													GP59:ON Low	E
													JAM1:AN Low	E F
													GP59:O Low	F G
													JAM1:ON Low	G

## Sheet: fnr
Low						High
JAM1	JAM1	JAM1	GP59	GP59	GP59	JAM1	JAM1	JAM1	GP59	GP59	GP59
O	ON	AN	O	ON	AN	O	ON	AN	O	ON	AN
1.033	0.72	1.321	0.825	1.188	1.672	1.465	1.227	1.67	1.401	1.652	1.401		Table Analyzed	fnr
1.104	0.729	1.404	1.296	1.254	1.637	1.515	1.26	1.674	1.399	1.712	1.485
1.032	0.691	1.274	1.316	1.185	1.66	1.466	1.186	1.708	1.38	1.617	1.422		Two-way ANOVA	Ordinary
1.102	0.701	1.357	1.236	1.251	1.625	1.516	1.356	1.712	1.378	1.676	1.506		Alpha	0.05
1.193	0.831	0.773	1.255	1.197	1.773	1.334	1.335	1.698	1.513	2.012	1.384
1.176	0.886	0.801	0.857	1.204	1.836	1.303	1.281	1.7	1.476	2.06	1.42		Source of Variation	% of total variation	P value	P value summary	Significant?
1.191	0.802	0.721	0.86	1.194	1.761	1.335	1.261	1.736	1.491	1.977	1.404		Interaction	14.45	<0.0001	****	Yes
1.175	0.857	0.749	0.836	1.201	1.824	1.303	1.905	1.739	1.454	2.024	1.441		Row Factor	5.201	<0.0001	****	Yes
1.3	1.131	0.914	0.839	1.143	2.116	2.052	1.363	1.268	2.046	1.609	1.513		Column Factor	32.91	<0.0001	****	Yes
1.264	1.183	0.994	0.874	1.089	2.158	2.053	1.324	1.253	2.077	1.608	1.597
1.299	1.101	0.862	0.874	1.13	2.104	1.496	1.374	1.299	2.025	1.608	1.533		ANOVA table	SS (Type III)	DF	MS	F (DFn, DFd)	P value
1.262	1.154	0.943	0.854	1.076	2.146	1.523	1.335	1.284	2.055	1.607	1.617		Interaction	9.187	5	1.837	F (5, 495) = 29.53	P<0.0001
1.044	0.846	1.541	0.854	1.314	1.952	1.504	1.926	1.949	1.973	1.831	1.459		Row Factor	3.306	1	3.306	F (1, 495) = 53.14	P<0.0001
1.111	0.809	1.565	1.359	1.324	1.912	1.531	1.938	1.98	1.974	1.847	1.464		Column Factor	20.92	5	4.185	F (5, 495) = 67.25	P<0.0001
1.009	0.761	1.489	1.37	1.301	1.94	1.23	1.246	1.651	1.407	1.83	1.373		Residual	30.8	495	0.06222
1.076	0.724	1.513	1.339	1.312	1.899	1.224	1.26	1.628	1.393	1.846	1.379
1.172	0.873	0.831	1.35	1.136	1.831	1.238	1.221	1.682	1.271	2.461	1.818		Difference between row means
1.277	0.962	0.906	0.98	1.137	1.863	1.231	1.234	1.659	1.256	2.46	1.972		Predicted (LS) mean of JAM1	1.318
1.137	0.788	0.776	1.004	1.107	1.818	2.041	1.235	1.181	1.392	1.578	1.733		Predicted (LS) mean of GP59	1.492
1.242	0.878	0.852	0.956	1.108	1.851	2.014	1.254	1.75	1.377	1.607	1.887		Difference between predicted means	-0.1743
1.402	1.186	1.147	0.98	1.241		2.048	1.209	1.699	1.256	1.549	1.239		SE of difference	0.02392
1.561	1.255	1.195	0.922	1.33		2.022	1.228	1.806	1.241	1.577	1.261		95% CI of difference	-0.2213 to -0.1273
1.368	1.101	1.092	0.9	1.211		1.523	1.907	1.755	1.56	1.639	1.228
1.526	1.17	1.14	0.898	1.301		1.604	1.881	1.744	1.767	1.694	1.25		Data summary
1.119	0.711		0.876	1.47		1.425	1.368	1.772	1.57	1.609	1.192		Number of columns (Column Factor)	6
1.197	0.74			1.589		1.506	1.392	1.98	1.777	1.664	1.173		Number of rows (Row Factor)	2
1.092	0.713			1.44		1.34	1.377	1.223	1.485	2.396	1.181		Number of values	507
1.171	0.742			1.56		1.346	1.4	1.38	1.534	2.415	1.162
1.207	0.788					1.242	1.312	1.117	1.495	2.366	1.397
1.177	0.767					1.248	1.275	1.273	1.543	2.386	1.373		Compare cell means regardless of rows and columns
1.181	0.79					1.905	1.321	1.935	1.408	1.432	1.386
1.151	0.769					1.972	1.284	1.785	1.406	1.471	1.362		Number of families	1
1.373	1.247					1.807	1.949	1.828	1.482	1.444	1.451		Number of comparisons per family	66
1.393	1.288					1.874	1.564	1.678	1.48	1.482	1.477		Alpha	0.05
1.347	1.249					1.773	1.616	1.985	1.228	1.322	1.512
1.367	1.29					1.808	1.525	1.765	1.235	1.329	1.538		Tukey's multiple comparisons test	Predicted (LS) mean diff.	95.00% CI of diff.	Below threshold?	Summary	Adjusted P Value
						1.732	1.577	1.878	1.302	1.333	1.199
						1.767	1.56	1.658	1.309	1.34	1.16		JAM1:O Low vs. JAM1:ON Low	0.295	0.1019 to 0.4881	Yes	****	<0.0001
						1.71	1.223	1.248	1.913	1.918	1.261		JAM1:O Low vs. JAM1:AN Low	0.128	-0.08786 to 0.3439	No	ns	0.7287
						1.731	1.521	1.309	1.973	1.881	1.221		JAM1:O Low vs. JAM1:O-High	-0.426	-0.5976 to -0.2544	Yes	****	<0.0001
						1.669	1.184	1.232	1.987	1.929	1.675		JAM1:O Low vs. JAM1:ON-High	-0.227	-0.4060 to -0.04796	Yes	**	0.0022
						1.69	1.938	1.294	2.047	1.892	1.661		JAM1:O Low vs. JAM1:AN-High	-0.37	-0.5523 to -0.1877	Yes	****	<0.0001
						2.194	1.347	1.33	1.485	1.414	1.736		JAM1:O Low vs. GP59:O Low	0.19	-0.02325 to 0.4033	No	ns	0.1351
						2.153	1.192	1.438	1.505	1.451	1.722		JAM1:O Low vs. GP59:ON Low	-0.032	-0.2384 to 0.1744	No	ns	>0.9999
						1.672	1.495	1.314	1.41	1.371	1.517		JAM1:O Low vs. GP59:AN Low	-0.651	-0.8794 to -0.4226	Yes	****	<0.0001
						1.706	1.34	1.422	1.43	1.408	1.466		JAM1:O Low vs. GP59:O-High	-0.381	-0.5526 to -0.2094	Yes	****	<0.0001
						1.671	1.606		1.316	1.204	1.423		JAM1:O Low vs. GP59:ON-High	-0.482	-0.6536 to -0.3104	Yes	****	<0.0001
						1.705	1.615		1.272	1.222	1.372		JAM1:O Low vs. GP59:AN-High	-0.29	-0.4650 to -0.1150	Yes	****	<0.0001
						1.688	1.754		1.242	1.86	1.89		JAM1:ON Low vs. JAM1:AN Low	-0.167	-0.3829 to 0.04886	No	ns	0.3173
						1.699	1.763		1.198	1.814	2.028		JAM1:ON Low vs. JAM1:O-High	-0.721	-0.8926 to -0.5494	Yes	****	<0.0001
						1.687			2.028	1.816	1.796		JAM1:ON Low vs. JAM1:ON-High	-0.522	-0.7010 to -0.3430	Yes	****	<0.0001
						1.698			2.06	1.77	1.935		JAM1:ON Low vs. JAM1:AN-High	-0.665	-0.8473 to -0.4827	Yes	****	<0.0001
						2.163			1.954	1.409	1.826		JAM1:ON Low vs. GP59:O Low	-0.105	-0.3183 to 0.1083	No	ns	0.9024
						2.162			1.985	1.437	1.971		JAM1:ON Low vs. GP59:ON Low	-0.327	-0.5334 to -0.1206	Yes	****	<0.0001
						1.593			1.663	1.225	1.732		JAM1:ON Low vs. GP59:AN Low	-0.946	-1.174 to -0.7176	Yes	****	<0.0001
						1.512			1.686	1.254	1.877		JAM1:ON Low vs. GP59:O-High	-0.676	-0.8476 to -0.5044	Yes	****	<0.0001
						1.596			1.701	1.254			JAM1:ON Low vs. GP59:ON-High	-0.777	-0.9486 to -0.6054	Yes	****	<0.0001
						1.515			1.724	1.255			JAM1:ON Low vs. GP59:AN-High	-0.585	-0.7600 to -0.4100	Yes	****	<0.0001
						1.617			1.939	2.004			JAM1:AN Low vs. JAM1:O-High	-0.554	-0.7509 to -0.3571	Yes	****	<0.0001
						1.585			1.911	1.945			JAM1:AN Low vs. JAM1:ON-High	-0.355	-0.5584 to -0.1516	Yes	****	<0.0001
						1.62			1.976	1.821			JAM1:AN Low vs. JAM1:AN-High	-0.498	-0.7043 to -0.2917	Yes	****	<0.0001
						1.588			1.948	1.761			JAM1:AN Low vs. GP59:O Low	0.062	-0.1721 to 0.2961	No	ns	0.9994
													JAM1:AN Low vs. GP59:ON Low	-0.16	-0.3879 to 0.06786	No	ns	0.4738
													JAM1:AN Low vs. GP59:AN Low	-0.779	-1.027 to -0.5310	Yes	****	<0.0001
													JAM1:AN Low vs. GP59:O-High	-0.509	-0.7059 to -0.3121	Yes	****	<0.0001
													JAM1:AN Low vs. GP59:ON-High	-0.61	-0.8069 to -0.4131	Yes	****	<0.0001
													JAM1:AN Low vs. GP59:AN-High	-0.418	-0.6178 to -0.2182	Yes	****	<0.0001
													JAM1:O-High vs. JAM1:ON-High	0.199	0.04330 to 0.3547	Yes	**	0.0019
													JAM1:O-High vs. JAM1:AN-High	0.056	-0.1034 to 0.2154	No	ns	0.9919
													JAM1:O-High vs. GP59:O Low	0.616	0.4219 to 0.8101	Yes	****	<0.0001
													JAM1:O-High vs. GP59:ON Low	0.394	0.2075 to 0.5805	Yes	****	<0.0001
													JAM1:O-High vs. GP59:AN Low	-0.225	-0.4356 to -0.01436	Yes	*	0.0246
													JAM1:O-High vs. GP59:O-High	0.045	-0.1021 to 0.1921	No	ns	0.9976
													JAM1:O-High vs. GP59:ON-High	-0.056	-0.2031 to 0.09112	No	ns	0.9845
													JAM1:O-High vs. GP59:AN-High	0.136	-0.01501 to 0.2870	No	ns	0.1246
													JAM1:ON-High vs. JAM1:AN-High	-0.143	-0.3103 to 0.02435	No	ns	0.1806
													JAM1:ON-High vs. GP59:O Low	0.417	0.2164 to 0.6176	Yes	****	<0.0001
													JAM1:ON-High vs. GP59:ON Low	0.195	0.001656 to 0.3883	Yes	*	0.0459
													JAM1:ON-High vs. GP59:AN Low	-0.424	-0.6407 to -0.2073	Yes	****	<0.0001
													JAM1:ON-High vs. GP59:O-High	-0.154	-0.3097 to 0.001696	No	ns	0.0557
													JAM1:ON-High vs. GP59:ON-High	-0.255	-0.4107 to -0.09930	Yes	****	<0.0001
													JAM1:ON-High vs. GP59:AN-High	-0.063	-0.2224 to 0.09638	No	ns	0.9792
													JAM1:AN-High vs. GP59:O Low	0.56	0.3565 to 0.7635	Yes	****	<0.0001
													JAM1:AN-High vs. GP59:ON Low	0.338	0.1417 to 0.5343	Yes	****	<0.0001
													JAM1:AN-High vs. GP59:AN Low	-0.281	-0.5004 to -0.06161	Yes	**	0.0018
													JAM1:AN-High vs. GP59:O-High	-0.011	-0.1704 to 0.1484	No	ns	>0.9999
													JAM1:AN-High vs. GP59:ON-High	-0.112	-0.2714 to 0.04740	No	ns	0.4727
													JAM1:AN-High vs. GP59:AN-High	0.08	-0.08300 to 0.2430	No	ns	0.9043
													GP59:O Low vs. GP59:ON Low	-0.222	-0.4474 to 0.003391	No	ns	0.058
													GP59:O Low vs. GP59:AN Low	-0.841	-1.087 to -0.5953	Yes	****	<0.0001
													GP59:O Low vs. GP59:O-High	-0.571	-0.7651 to -0.3769	Yes	****	<0.0001
													GP59:O Low vs. GP59:ON-High	-0.672	-0.8661 to -0.4779	Yes	****	<0.0001
													GP59:O Low vs. GP59:AN-High	-0.48	-0.6770 to -0.2830	Yes	****	<0.0001
													GP59:ON Low vs. GP59:AN Low	-0.619	-0.8588 to -0.3792	Yes	****	<0.0001
													GP59:ON Low vs. GP59:O-High	-0.349	-0.5355 to -0.1625	Yes	****	<0.0001
													GP59:ON Low vs. GP59:ON-High	-0.45	-0.6365 to -0.2635	Yes	****	<0.0001
													GP59:ON Low vs. GP59:AN-High	-0.258	-0.4476 to -0.06841	Yes	***	0.0006
													GP59:AN Low vs. GP59:O-High	0.27	0.05936 to 0.4806	Yes	**	0.0018
													GP59:AN Low vs. GP59:ON-High	0.169	-0.04164 to 0.3796	No	ns	0.2633
													GP59:AN Low vs. GP59:AN-High	0.361	0.1476 to 0.5744	Yes	****	<0.0001
													GP59:O-High vs. GP59:ON-High	-0.101	-0.2481 to 0.04612	No	ns	0.5108
													GP59:O-High vs. GP59:AN-High	0.091	-0.06001 to 0.2420	No	ns	0.7077
													GP59:ON-High vs. GP59:AN-High	0.192	0.04099 to 0.3430	Yes	**	0.0021
													Test details	Predicted (LS) mean 1	Predicted (LS) mean 2	Predicted (LS) mean diff.	SE of diff.	N1	N2	q	DF
													JAM1:O Low vs. JAM1:ON Low	1.218	0.923	0.295	0.05879	36	36	7.096	495
													JAM1:O Low vs. JAM1:AN Low	1.218	1.09	0.128	0.06573	36	24	2.754	495
													JAM1:O Low vs. JAM1:O-High	1.218	1.644	-0.426	0.05227	36	62	11.53	495
													JAM1:O Low vs. JAM1:ON-High	1.218	1.445	-0.227	0.05452	36	50	5.888	495
													JAM1:O Low vs. JAM1:AN-High	1.218	1.588	-0.37	0.05551	36	46	9.427	495
													JAM1:O Low vs. GP59:O Low	1.218	1.028	0.19	0.06494	36	25	4.138	495
													JAM1:O Low vs. GP59:ON Low	1.218	1.25	-0.032	0.06285	36	28	0.72	495
													JAM1:O Low vs. GP59:AN Low	1.218	1.869	-0.651	0.06957	36	20	13.23	495
													JAM1:O Low vs. GP59:O-High	1.218	1.599	-0.381	0.05227	36	62	10.31	495
													JAM1:O Low vs. GP59:ON-High	1.218	1.7	-0.482	0.05227	36	62	13.04	495
													JAM1:O Low vs. GP59:AN-High	1.218	1.508	-0.29	0.05329	36	56	7.697	495
													JAM1:ON Low vs. JAM1:AN Low	0.923	1.09	-0.167	0.06573	36	24	3.593	495
													JAM1:ON Low vs. JAM1:O-High	0.923	1.644	-0.721	0.05227	36	62	19.51	495
													JAM1:ON Low vs. JAM1:ON-High	0.923	1.445	-0.522	0.05452	36	50	13.54	495
													JAM1:ON Low vs. JAM1:AN-High	0.923	1.588	-0.665	0.05551	36	46	16.94	495
													JAM1:ON Low vs. GP59:O Low	0.923	1.028	-0.105	0.06494	36	25	2.287	495
													JAM1:ON Low vs. GP59:ON Low	0.923	1.25	-0.327	0.06285	36	28	7.358	495
													JAM1:ON Low vs. GP59:AN Low	0.923	1.869	-0.946	0.06957	36	20	19.23	495
													JAM1:ON Low vs. GP59:O-High	0.923	1.599	-0.676	0.05227	36	62	18.29	495
													JAM1:ON Low vs. GP59:ON-High	0.923	1.7	-0.777	0.05227	36	62	21.02	495
													JAM1:ON Low vs. GP59:AN-High	0.923	1.508	-0.585	0.05329	36	56	15.53	495
													JAM1:AN Low vs. JAM1:O-High	1.09	1.644	-0.554	0.05997	24	62	13.06	495
													JAM1:AN Low vs. JAM1:ON-High	1.09	1.445	-0.355	0.06194	24	50	8.105	495
													JAM1:AN Low vs. JAM1:AN-High	1.09	1.588	-0.498	0.06281	24	46	11.21	495
													JAM1:AN Low vs. GP59:O Low	1.09	1.028	0.062	0.07128	24	25	1.23	495
													JAM1:AN Low vs. GP59:ON Low	1.09	1.25	-0.16	0.06939	24	28	3.261	495
													JAM1:AN Low vs. GP59:AN Low	1.09	1.869	-0.779	0.07552	24	20	14.59	495
													JAM1:AN Low vs. GP59:O-High	1.09	1.599	-0.509	0.05997	24	62	12	495
													JAM1:AN Low vs. GP59:ON-High	1.09	1.7	-0.61	0.05997	24	62	14.39	495
													JAM1:AN Low vs. GP59:AN-High	1.09	1.508	-0.418	0.06086	24	56	9.714	495
													JAM1:O-High vs. JAM1:ON-High	1.644	1.445	0.199	0.04741	62	50	5.936	495
													JAM1:O-High vs. JAM1:AN-High	1.644	1.588	0.056	0.04854	62	46	1.632	495
													JAM1:O-High vs. GP59:O Low	1.644	1.028	0.616	0.0591	62	25	14.74	495
													JAM1:O-High vs. GP59:ON Low	1.644	1.25	0.394	0.0568	62	28	9.811	495
													JAM1:O-High vs. GP59:AN Low	1.644	1.869	-0.225	0.06415	62	20	4.961	495
													JAM1:O-High vs. GP59:O-High	1.644	1.599	0.045	0.0448	62	62	1.42	495
													JAM1:O-High vs. GP59:ON-High	1.644	1.7	-0.056	0.0448	62	62	1.768	495
													JAM1:O-High vs. GP59:AN-High	1.644	1.508	0.136	0.04599	62	56	4.182	495
													JAM1:ON-High vs. JAM1:AN-High	1.445	1.588	-0.143	0.05096	50	46	3.968	495
													JAM1:ON-High vs. GP59:O Low	1.445	1.028	0.417	0.0611	50	25	9.652	495
													JAM1:ON-High vs. GP59:ON Low	1.445	1.25	0.195	0.05888	50	28	4.684	495
													JAM1:ON-High vs. GP59:AN Low	1.445	1.869	-0.424	0.066	50	20	9.086	495
													JAM1:ON-High vs. GP59:O-High	1.445	1.599	-0.154	0.04741	50	62	4.593	495
													JAM1:ON-High vs. GP59:ON-High	1.445	1.7	-0.255	0.04741	50	62	7.606	495
													JAM1:ON-High vs. GP59:AN-High	1.445	1.508	-0.063	0.04853	50	56	1.836	495
													JAM1:AN-High vs. GP59:O Low	1.588	1.028	0.56	0.06198	46	25	12.78	495
													JAM1:AN-High vs. GP59:ON Low	1.588	1.25	0.338	0.05979	46	28	7.995	495
													JAM1:AN-High vs. GP59:AN Low	1.588	1.869	-0.281	0.06681	46	20	5.948	495
													JAM1:AN-High vs. GP59:O-High	1.588	1.599	-0.011	0.04854	46	62	0.3205	495
													JAM1:AN-High vs. GP59:ON-High	1.588	1.7	-0.112	0.04854	46	62	3.263	495
													JAM1:AN-High vs. GP59:AN-High	1.588	1.508	0.08	0.04964	46	56	2.279	495
													GP59:O Low vs. GP59:ON Low	1.028	1.25	-0.222	0.06864	25	28	4.574	495
													GP59:O Low vs. GP59:AN Low	1.028	1.869	-0.841	0.07483	25	20	15.89	495
													GP59:O Low vs. GP59:O-High	1.028	1.599	-0.571	0.0591	25	62	13.66	495
													GP59:O Low vs. GP59:ON-High	1.028	1.7	-0.672	0.0591	25	62	16.08	495
													GP59:O Low vs. GP59:AN-High	1.028	1.508	-0.48	0.06	25	56	11.31	495
													GP59:ON Low vs. GP59:AN Low	1.25	1.869	-0.619	0.07303	28	20	11.99	495
													GP59:ON Low vs. GP59:O-High	1.25	1.599	-0.349	0.0568	28	62	8.69	495
													GP59:ON Low vs. GP59:ON-High	1.25	1.7	-0.45	0.0568	28	62	11.2	495
													GP59:ON Low vs. GP59:AN-High	1.25	1.508	-0.258	0.05773	28	56	6.32	495
													GP59:AN Low vs. GP59:O-High	1.869	1.599	0.27	0.06415	20	62	5.953	495
													GP59:AN Low vs. GP59:ON-High	1.869	1.7	0.169	0.06415	20	62	3.726	495
													GP59:AN Low vs. GP59:AN-High	1.869	1.508	0.361	0.06498	20	56	7.857	495
													GP59:O-High vs. GP59:ON-High	1.599	1.7	-0.101	0.0448	62	62	3.188	495
													GP59:O-High vs. GP59:AN-High	1.599	1.508	0.091	0.04599	62	56	2.799	495
													GP59:ON-High vs. GP59:AN-High	1.7	1.508	0.192	0.04599	62	56	5.905	495
													Compact letter display
													GP59:AN Low	A
													GP59:ON-High	A B
													JAM1:O-High	B C
													GP59:O-High	B D
													JAM1:AN-High	B D
													GP59:AN-High	C D
													JAM1:ON-High	D
													GP59:ON Low	E
													JAM1:O Low	E
													JAM1:AN Low	E F
													GP59:O Low	E F
													JAM1:ON Low	F
