# Supplementary material for: The bacterial strains JAM1T and GP59 of the species Methylophaga nitratireducenticrescens differ in their expression profiles of denitrification genes in oxic and anoxic cultures
Source: PeerJ. 2024 Oct 28;12:e18361. doi: 10.7717/peerj.18361 (PMC11526790; doi:10.7717/peerj.18361)
Supplement: Supplemental Information 3 [file peerj-12-18361-s003.xlsx]

## Sheet: Instructions
	Common genes Sheet
		Strain JAM1 and Strain GP59 Common genes
		Annotation from GenBank and RAST, ORF coordinates, Raw reads, processed read (RPK and TPM)
	PCoA Sheet
		Values for PCoA are expressed in Transcript per million (TPM)
		Condition matrice
	Annotations Sheet:
		Correspondence between Gene ID (used in PCoA) and annotations

## Sheet: Common genes
JAM1									JAM1 raw reads									GP59													GP59 raw reads										JAM1 RPK
	RAST	GenBank	Start	End	length	strand	Function		JO1	JO2	JO3	JON1	JON2	JON3	JAN1	JAN2	JAN3		RAST	Start	End	length	strand	Function							GO1	GO2	GO3	GON1	GON2	GON3	GAN1	GAN2	GAN3		JO1	JO2	JO3	JON1	JON2	JON3	JAN1	JAN2	JAN3
							RAST	GenBank	54448622	35283971	51191364	49293353	41742488	74856508	45512654	43401772	45294633							RAST	GenBank						20340596	17289368	48505230	35655459	51376859	28060079	35908614	34513590	6941959		7.91636e+07	5.01269e+07	7.28972e+07	7.06721e+07	6.06724e+07	1.04961e+08	6.99964e+07	6.76882e+07	6.93289e+07
CDS	peg.1	Q7A_2	308	976	669	-	Queuosine Biosynthesis QueC ATPase	7-cyano-7-deazaguanine synthase; AFI82863.1	14562	8153	12665	9525	7778	17834	5357	3349	3192	CDS	peg.1	308	976	669	-	Queuosine Biosynthesis QueC ATPase	CDW43_RS00010	CDW43_RS00010	7-cyano-7-deazaguanine synthase QueC	7-cyano-7-deazaguanine synthase QueC			4288	3318	10184	4242	7720	4579	5858	4473	685		21766.8	12186.8	18931.2	14237.7	11626.3	26657.7	8007.47	5005.98	4771.3
CDS	peg.2	Q7A_3	973	1614	642	-	Queuosine Biosynthesis QueE Radical SAM	7-carboxy-7-deazaguanine synthase QueE; AFI82864.1	16564	10776	15932	12917	10199	22958	5435	3718	3288	CDS	peg.2	973	1614	642	-	Queuosine Biosynthesis QueE Radical SAM	CDW43_RS00015	CDW43_RS00015	7-carboxy-7-deazaguanine synthase QueE	7-carboxy-7-deazaguanine synthase QueE			5218	4143	13994	6728	11952	7352	7734	5192	856		25800.6	16785	24816.2	20119.9	15886.3	35760.1	8465.73	5791.28	5121.5
CDS	peg.3	Q7A_4	1638	2468	831	-	TPR repeat containing exported protein Putative periplasmic protein contains a protein prenylyltransferase domain	tol-pal system protein YbgF; AFI82865.1	37087	30480	40973	33420	24812	54532	11452	7663	6793	CDS	peg.3	1638	2468	831	-	TPR repeat containing exported protein Putative periplasmic protein contains a protein prenylyltransferase domain	CDW43_RS00020	CDW43_RS00020	tol-pal system protein YbgF	tol-pal system protein YbgF			11046	11152	40801	23637	38426	23445	18501	14272	2578		44629.4	36678.7	49305.7	40216.6	29858	65622.1	13781	9221.42	8174.49
CDS	peg.4	Q7A_5	2470	3039	570	-	18K peptidoglycan-associated outer membrane lipoprotein Peptidoglycan-associated lipoprotein precursor Outer membrane protein P6 OmpA/MotB precursor	peptidoglycan-associated lipoprotein; AFI82866.1	29443	17040	24151	20001	18376	35428	14590	9874	8130	CDS	peg.4	2470	3039	570	-	18K peptidoglycan-associated outer membrane lipoprotein Peptidoglycan-associated lipoprotein precursor Outer membrane protein P6 OmpA/MotB precursor	CDW43_RS00025	CDW43_RS00025	peptidoglycan-associated lipoprotein Pal	peptidoglycan-associated lipoprotein Pal			11491	9321	26206	15956	24659	12922	16421	13446	2584		51654.4	29894.7	42370.2	35089.5	32238.6	62154.4	25596.5	17322.8	14263.2
CDS	peg.5	Q7A_6	3061	4362	1302	-	tolB protein precursor, periplasmic protein involved in the tonb-independent uptake of group A colicins	Tol-Pal system beta propeller repeat protein TolB; AFI82867.1	29310	16973	24302	20527	19385	35726	18382	14630	13513	CDS	peg.5	3061	4362	1302	-	tolB protein precursor, periplasmic protein involved in the tonb-independent uptake of group A colicins	CDW43_RS00030	CDW43_RS00030	Tol-Pal system beta propeller repeat protein TolB	Tol-Pal system beta propeller repeat protein TolB			13399	10652	26156	16539	24623	13681	17651	15121	3240		22511.5	13036.1	18665.1	15765.7	14888.6	27439.3	14118.3	11236.6	10378.6
CDS	peg.6	Q7A_7	4374	5456	1083	-	TolA protein	protein TolA; AFI82868.2	8984	5949	9705	8955	6207	14342	9966	6865	6807	CDS	peg.6	4374	5507	1134	-	TolA protein	CDW43_RS00035	CDW43_RS00035	cell envelope integrity protein TolA	cell envelope integrity protein TolA			3698	3494	12713	8053	12318	7128	14707	11311	1825		8295.48	5493.07	8961.22	8268.7	5731.3	13242.8	9202.22	6338.87	6285.32
CDS	peg.7	Q7A_8	5463	5909	447	-	Tol biopolymer transport system, TolR protein	protein TolR; AFI82869.1	18462	12284	18930	17251	12901	24367	9859	7067	6682	CDS	peg.7	5514	5960	447	-	Tol biopolymer transport system, TolR protein	CDW43_RS00040	CDW43_RS00040	protein TolR	protein TolR			8257	7105	19514	13336	20334	12767	8394	7436	1498		41302	27481	42349	38592.8	28861.3	54512.3	22055.9	15809.8	14948.5
CDS	peg.8	Q7A_9	5924	6592	669	-	MotA/TolQ/ExbB proton channel family protein	Tol-Pal system subunit TolQ; AFI82870.1	20504	12267	19083	17439	13912	24947	12092	7863	7082	CDS	peg.8	5975	6643	669	-	MotA/TolQ/ExbB proton channel family protein	CDW43_RS00045	CDW43_RS00045	protein TolQ	protein TolQ			8652	7132	18470	12517	19436	12202	10284	8776	1986		30648.7	18336.3	28524.7	26067.3	20795.2	37290	18074.7	11753.4	10585.9
CDS	peg.9	Q7A_10	6582	6986	405	-	4-hydroxybenzoyl-CoA thioesterase family active site	tol-pal system-associated acyl-CoA thioesterase; AFI82871.1	12892	6986	11746	10893	9058	16503	8502	5677	5262	CDS	peg.9	6633	7037	405	-	4-hydroxybenzoyl-CoA thioesterase family active site	CDW43_RS00050	CDW43_RS00050	tol-pal system-associated acyl-CoA thioesterase	tol-pal system-associated acyl-CoA thioesterase			5465	4405	11360	6631	11332	6492	7879	6770	1173		31832.1	17249.4	29002.5	26896.3	22365.4	40748.1	20992.6	14017.3	12992.6
CDS	peg.10	Q7A_11	6986	7999	1014	-	Holliday junction DNA helicase RuvB	Holliday junction branch migration DNA helicase RuvB; AFI82872.1	43924	24050	40561	40061	33234	55834	24277	16383	14214	CDS	peg.10	7037	8050	1014	-	Holliday junction DNA helicase RuvB	CDW43_RS00055	CDW43_RS00055	Holliday junction branch migration DNA helicase RuvB	Holliday junction branch migration DNA helicase RuvB			18106	13867	33545	20068	34407	19146	20233	15969	2245		43317.6	23717.9	40001	39507.9	32775.1	55063.1	23941.8	16156.8	14017.8
CDS	peg.11	Q7A_12	8002	8598	597	-	Holliday junction DNA helicase RuvA	Holliday junction branch migration protein RuvA; AFI82873.1	15315	8950	14717	13696	10685	20521	6052	3771	3672	CDS	peg.11	8053	8649	597	-	Holliday junction DNA helicase RuvA	CDW43_RS00060	CDW43_RS00060	Holliday junction branch migration protein RuvA	Holliday junction branch migration protein RuvA			5267	4373	13988	7591	12544	7363	5698	4741	587		25653.3	14991.6	24651.6	22941.4	17897.8	34373.5	10137.4	6316.58	6150.75
CDS	peg.12	Q7A_13	8595	9134	540	-	Crossover junction endodeoxyribonuclease RuvC (EC 3.1.22.4)	crossover junction endodeoxyribonuclease RuvC; AFI82874.1	14125	9213	14224	16261	11302	22794	8281	6108	5360	CDS	peg.12	8646	9185	540	-	Crossover junction endodeoxyribonuclease RuvC (EC 3.1.22.4)	CDW43_RS00065	CDW43_RS00065	crossover junction endodeoxyribonuclease RuvC	crossover junction endodeoxyribonuclease RuvC			5072	4647	13783	7820	13007	8284	6729	5907	801		26157.4	17061.1	26340.7	30113	20929.6	42211.1	15335.2	11311.1	9925.93
CDS	peg.13	Q7A_14	9149	9898	750	-	FIG000859: hypothetical protein YebC	YebC/PmpR family DNA-binding transcriptional regulator; AFI82875.1	19898	13101	19498	24462	18916	33033	19323	13354	11728	CDS	peg.13	9200	9949	750	-	FIG000859: hypothetical protein YebC	CDW43_RS00070	CDW43_RS00070	YebC/PmpR family DNA-binding transcriptional regulator	YebC/PmpR family DNA-binding transcriptional regulator			9378	8216	19411	12532	20398	11309	14644	13325	1951		26530.7	17468	25997.3	32616	25221.3	44044	25764	17805.3	15637.3
CDS	peg.14	Q7A_15	9946	10860	915	-	Branched-chain amino acid aminotransferase (EC 2.6.1.42)	branched chain amino acid aminotransferase; AFI82876.2	24056	15725	22582	29360	21813	37255	23932	16565	14007	CDS	peg.14	9997	10911	915	-	Branched-chain amino acid aminotransferase (EC 2.6.1.42)	CDW43_RS00075	#N/A	branched-chain amino acid transaminase	#N/A			10993	9907	22709	17782	26391	14221	14488	14923	2452		26290.7	17185.8	24679.8	32087.4	23839.3	40715.8	26155.2	18103.8	15308.2
CDS	peg.15	Q7A_16	10918	13761	2844	-	Glutamate-ammonia-ligase adenylyltransferase (EC 2.7.7.42)	bifunctional glutamine synthetase adenylyltransferase/deadenyltransferase; AFI82877.1	19892	12192	17981	21298	17982	30597	12618	10930	9209	CDS	peg.15	10969	13812	2844	-	Glutamate-ammonia-ligase adenylyltransferase (EC 2.7.7.42)	CDW43_RS00080	#N/A	bifunctional [glutamate--ammonia ligase]-adenylyl-L-tyrosine phosphorylase/[glutamate--ammonia-ligase] adenylyltransferase	#N/A			7067	5819	18004	16939	23763	11712	8480	9503	1940		6994.37	4286.92	6322.43	7488.75	6322.78	10758.4	4436.71	3843.18	3238.05
CDS	peg.16	Q7A_17	14085	14453	369	+	hypothetical protein	hypothetical protein; AFI82878.1	5438	2941	4649	5375	4222	6904	5537	5069	4731	CDS	peg.16	14136	14504	369	+	hypothetical protein	CDW43_RS00085	CDW43_RS00085	DUF6164 family protein	DUF6164 family protein			1824	1597	4491	5381	6322	3337	7700	6316	1014		14737.1	7970.19	12598.9	14566.4	11441.7	18710	15005.4	13737.1	12821.1
CDS	peg.17	Q7A_18	14543	16171	1629	-	Heat shock protein 60 family chaperone GroEL	molecular chaperone GroEL; AFI82879.1	213374	177768	234059	110599	126551	296975	89727	95721	128944	CDS	peg.17	14594	16222	1629	-	Heat shock protein 60 family chaperone GroEL	CDW43_RS00090	CDW43_RS00090	chaperonin GroEL	chaperonin GroEL			111060	90086	207039	36454	70514	55991	36743	73334	24470		130985	109127	143683	67893.8	77686.3	182305	55081	58760.6	79155.3
CDS	peg.18	Q7A_19	16229	16519	291	-	Heat shock protein 60 family co-chaperone GroES	co-chaperone GroES; AFI82880.1	23590	18280	23432	9503	12496	29591	12677	12929	18872	CDS	peg.18	16280	16570	291	-	Heat shock protein 60 family co-chaperone GroES	CDW43_RS00095	CDW43_RS00095	co-chaperone GroES	co-chaperone GroES			11592	10644	21413	4133	7176	5128	5472	11337	5915		81065.3	62817.9	80522.3	32656.4	42941.6	101687	43563.6	44429.6	64852.2
CDS	peg.19	Q7A_20	16667	17122	456	-	FxsA protein	exlusion protein FxsA; AFI82881.1	4556	3661	4178	2984	4567	7009	3064	2905	3751	CDS	peg.19	16718	17173	456	-	FxsA protein	CDW43_RS00100	CDW43_RS00100	FxsA family protein	FxsA family protein			3118	2099	3854	2276	2823	1641	992	2764	1265		9991.23	8028.51	9162.28	6543.86	10015.4	15370.6	6719.3	6370.61	8225.88
CDS	peg.20	Q7A_21	17351	18703	1353	+	Phosphate-specific outer membrane porin OprP Pyrophosphate-specific outer membrane porin OprO	porin; AFI82882.1	16441	4374	4755	6636	5464	8706	8282	8162	9707	CDS	peg.20	17402	18754	1353	+	Phosphate-specific outer membrane porin OprP Pyrophosphate-specific outer membrane porin OprO	CDW43_RS00105	CDW43_RS00105	porin	porin			2181	1856	4676	3681	10353	2596	4139	4927	3307		12151.5	3232.82	3514.41	4904.66	4038.43	6434.59	6121.21	6032.52	7174.43
CDS	peg.21	Q7A_22	18797	20587	1791	+	diguanylate cyclase/phosphodiesterase (GGDEF & EAL domains) with PAS/PAC sensor(s)	GGDEF domain-containing protein; AFI82883.1	8161	4785	7268	9524	7011	12755	8931	7940	9239	CDS	peg.21	18848	20638	1791	+	diguanylate cyclase/phosphodiesterase (GGDEF & EAL domains) with PAS/PAC sensor(s)	CDW43_RS00110	CDW43_RS00110	EAL and GGDEF domain-containing protein	EAL and GGDEF domain-containing protein			2768	2305	8180	6873	9975	5174	5259	6003	1277		4556.67	2671.69	4058.07	5317.7	3914.57	7121.72	4986.6	4433.28	5158.57
CDS	peg.22	Q7A_23	20621	21043	423	-	Arsenate reductase (EC 1.20.4.1)	arsenate reductase ArsC; AFI82884.1	2746	1826	2479	2958	2524	4279	2088	1926	2307	CDS	peg.22	20672	21094	423	-	Arsenate reductase (EC 1.20.4.1)	CDW43_RS00115	#N/A	arsenate reductase (thioredoxin)	#N/A			1039	872	2682	2729	4023	1684	1192	1412	468		6491.73	4316.78	5860.52	6992.91	5966.9	10115.8	4936.17	4553.19	5453.9
CDS	peg.23	Q7A_24	21216	21893	678	+	Bacterial SH3 domain homologue	ligand-binding protein SH3; AFI82885.1	6112	4389	6130	8334	5905	10689	8807	8282	8539	CDS	peg.23	21267	21944	678	+	Bacterial SH3 domain homologue	CDW43_RS00120	CDW43_RS00120	TIGR04211 family SH3 domain-containing protein	TIGR04211 family SH3 domain-containing protein			2399	2088	6163	7607	9397	4638	6693	7633	2105		9014.75	6473.45	9041.3	12292	8709.44	15765.5	12989.7	12215.3	12594.4
CDS	peg.24	Q7A_25	21935	22480	546	-	Pyridoxamine 5'-phosphate oxidase-related putative heme iron utilization protein	heme utilization protein HutZ; AFI82886.1	5909	4182	6177	7238	6574	11205	4063	4040	4453	CDS	peg.24	21986	22531	546	-	Pyridoxamine 5'-phosphate oxidase-related putative heme iron utilization protein	CDW43_RS00125	CDW43_RS00125	pyridoxamine 5'-phosphate oxidase family protein	pyridoxamine 5'-phosphate oxidase family protein			1877	1836	5672	5475	6793	3821	3506	4045	3779		10822.3	7659.34	11313.2	13256.4	12040.3	20522	7441.39	7399.27	8155.68
CDS	peg.25	#N/A	23104	23226	123	+	hypothetical protein	#N/A	851	537	878	1275	1082	1542	2115	2283	2876	CDS	peg.25	23155	23277	123	+	hypothetical protein	#N/A	#N/A	#N/A	#N/A			272	223	815	1001	1140	576	812	948	263		6918.7	4365.85	7138.21	10365.9	8796.75	12536.6	17195.1	18561	23382.1
CDS	peg.27	Q7A_27	23417	25201	1785	+	Lipid A export ATP-binding/permease protein MsbA	ABC transporter ATP-binding protein; AFI82888.1	10105	5641	8668	12106	11689	15363	21661	23319	28078	CDS	peg.26	23468	25252	1785	+	Lipid A export ATP-binding/permease protein MsbA	CDW43_RS00130	CDW43_RS00130	ABC transporter ATP-binding protein/permease	ABC transporter ATP-binding protein/permease			3881	3309	7883	6484	9137	4742	7615	9507	1609		5661.06	3160.22	4856.02	6782.07	6548.46	8606.72	12135	13063.9	15730
CDS	peg.28	Q7A_28	25535	27388	1854	-	Dihydroxy-acid dehydratase (EC 4.2.1.9)	dihydroxy-acid dehydratase; AFI82889.1	35128	19923	29929	38553	35291	48140	74900	86544	90018	CDS	peg.27	25586	27439	1854	-	Dihydroxy-acid dehydratase (EC 4.2.1.9)	CDW43_RS00135	CDW43_RS00135	dihydroxy-acid dehydratase	dihydroxy-acid dehydratase			17188	13807	26384	21032	31279	16000	28364	34538	5337		18947.1	10746	16142.9	20794.5	19035.1	25965.5	40399.1	46679.6	48553.4
CDS	peg.29	Q7A_29	27511	28806	1296	+	N-acetylglutamate synthase (EC 2.3.1.1)	amino-acid N-acetyltransferase; AFI82890.1	15965	12193	16359	22282	19044	31090	16789	16836	18900	CDS	peg.28	27562	28857	1296	+	N-acetylglutamate synthase (EC 2.3.1.1)	CDW43_RS00140	CDW43_RS00140	amino-acid N-acetyltransferase	amino-acid N-acetyltransferase			7002	6186	14238	12452	16370	9631	13442	13977	2693		12318.7	9408.18	12622.7	17192.9	14694.4	23989.2	12954.5	12990.7	14583.3
CDS	peg.30	Q7A_30	28803	29318	516	-	Adenosine (5')-pentaphospho-(5'')-adenosine pyrophosphohydrolase (EC 3.6.1.-)	RNA pyrophosphohydrolase; AFI82891.1	7794	4505	7033	8027	8274	12072	5990	6032	6486	CDS	peg.29	28854	29369	516	-	Adenosine (5')-pentaphospho-(5'')-adenosine pyrophosphohydrolase (EC 3.6.1.-)	CDW43_RS00145	CDW43_RS00145	RNA pyrophosphohydrolase	RNA pyrophosphohydrolase			4163	2966	6028	5948	7978	3899	5483	5955	1579		15104.7	8730.62	13629.8	15556.2	16034.9	23395.3	11608.5	11689.9	12569.8
CDS	peg.31	Q7A_31	29467	30123	657	+	Phosphoserine phosphatase (EC 3.1.3.3)	phosphoserine phosphatase; AFI82892.1	7762	4474	7154	7279	5828	10249	7473	7301	7844	CDS	peg.30	29518	30174	657	+	Phosphoserine phosphatase (EC 3.1.3.3)	CDW43_RS00150	CDW43_RS00150	HAD-IB family hydrolase	HAD-IB family hydrolase			2919	2433	5578	4004	5580	3094	8395	7853	982		11814.3	6809.74	10888.9	11079.1	8870.62	15599.7	11374.4	11112.6	11939.1
CDS	peg.32	Q7A_32	30170	31612	1443	+	Aspartyl-tRNA(Asn) amidotransferase subunit B (EC 6.3.5.6) @ Glutamyl-tRNA(Gln) amidotransferase subunit B (EC 6.3.5.7)	Asp-tRNA(Asn)/Glu-tRNA(Gln) amidotransferase GatCAB subunit B; AFI82893.1	26037	17676	24959	28769	22590	37913	28803	27400	28010	CDS	peg.31	30221	31663	1443	+	Aspartyl-tRNA(Asn) amidotransferase subunit B (EC 6.3.5.6) @ Glutamyl-tRNA(Gln) amidotransferase subunit B (EC 6.3.5.7)	CDW43_RS00155	CDW43_RS00155	Asp-tRNA(Asn)/Glu-tRNA(Gln) amidotransferase subunit GatB	Asp-tRNA(Asn)/Glu-tRNA(Gln) amidotransferase subunit GatB			10347	9061	20312	15468	23694	12520	21248	19382	4159		18043.7	12249.5	17296.6	19936.9	15654.9	26273.7	19960.5	18988.2	19410.9
CDS	peg.33	Q7A_33	31820	32962	1143	+	FIG00808804: hypothetical protein	hypothetical protein; AFI82894.1	39919	24862	47396	34814	23832	56579	16060	14593	15059	CDS	peg.32	31871	33013	1143	+	FIG00808804: hypothetical protein	CDW43_RS00160	CDW43_RS00160	FIST C-terminal domain-containing protein	FIST C-terminal domain-containing protein			22726	20000	77201	30711	57891	35214	20742	18385	4695		34924.8	21751.5	41466.3	30458.4	20850.4	49500.4	14050.7	12767.3	13175
CDS	peg.34	Q7A_34	32982	34256	1275	-	Glutamate--cysteine ligase (EC 6.3.2.2), divergent, of Alpha- and Beta-proteobacteria type	glutamate--cysteine ligase; AFI82895.1	27301	17319	26135	26888	24242	43307	26802	28469	27331	CDS	peg.33	33033	34307	1275	-	Glutamate--cysteine ligase (EC 6.3.2.2), divergent, of Alpha- and Beta-proteobacteria type	CDW43_RS00165	CDW43_RS00165	glutamate--cysteine ligase	glutamate--cysteine ligase			10572	8164	24176	18621	26533	14029	16661	19569	4224		21412.5	13583.5	20498	21088.6	19013.3	33966.3	21021.2	22328.6	21436.1
CDS	peg.35	#N/A	34336	34452	117	-	hypothetical protein	#N/A	5754	3475	5136	4891	4760	7134	2045	2092	1976	CDS	peg.34	34387	34503	117	-	hypothetical protein	#N/A	#N/A	#N/A	#N/A			2843	1793	3617	2738	4075	2145	1626	1819	355		49179.5	29700.9	43897.4	41803.4	40683.8	60974.4	17478.6	17880.3	16888.9
CDS	peg.36	Q7A_36	34944	35312	369	+	twitching motility protein PilG	response regulator; AFI82897.1	10193	6273	11224	11052	7585	16833	5428	5035	4706	CDS	peg.35	34995	35363	369	+	twitching motility protein PilG	CDW43_RS00170	CDW43_RS00170	response regulator	response regulator			5128	4369	23803	18885	25716	12750	4911	5999	1920		27623.3	17000	30417.3	29951.2	20555.6	45617.9	14710	13645	12753.4
CDS	peg.37	Q7A_37	35320	35691	372	+	twitching motility protein PilH	response regulator; AFI82898.1	4463	2674	4373	4778	3657	7873	4752	4845	4517	CDS	peg.36	35371	35742	372	+	twitching motility protein PilH	CDW43_RS00175	CDW43_RS00175	twitching motility response regulator PilH	twitching motility response regulator PilH			1953	1779	8763	6818	9323	4709	4404	5136	1584		11997.3	7188.17	11755.4	12844.1	9830.65	21164	12774.2	13024.2	12142.5
CDS	peg.38	Q7A_38	35688	36236	549	+	type IV pili signal transduction protein PilI	chemotaxis protein CheW; AFI82899.1	11541	7108	11803	13567	9373	19484	5455	5418	5486	CDS	peg.37	35739	36287	549	+	type IV pili signal transduction protein PilI	CDW43_RS00180	CDW43_RS00180	chemotaxis protein CheW	chemotaxis protein CheW			4501	4593	19936	14821	21151	11761	6246	6582	1403		21021.9	12947.2	21499.1	24712.2	17072.9	35490	9936.25	9868.85	9992.71
CDS	peg.39	Q7A_39	36261	37523	1263	+	type IV pilus biogenesis protein PilJ	chemotaxis protein; AFI82900.1	27565	16779	27870	34581	23694	46678	13371	14867	13045	CDS	peg.38	36312	37574	1263	+	type IV pilus biogenesis protein PilJ	#N/A	CDW43_RS00185	#N/A	methyl-accepting chemotaxis protein			12362	10648	40274	30140	47826	26149	10650	10254	2573		21825	13285	22066.5	27380	18760.1	36958	10586.7	11771.2	10328.6
CDS	peg.40	Q7A_40	37552	43257	5706	+	Signal transduction histidine kinase CheA (EC 2.7.3.-)	hybrid sensor histidine kinase/response regulator; AFI82901.1	110879	69620	121404	137597	87391	195292	33895	34589	30809	CDS	peg.39	37603	43308	5706	+	Signal transduction histidine kinase CheA (EC 2.7.3.-)	CDW43_RS00190	CDW43_RS00190	Hpt domain-containing protein	Hpt domain-containing protein			38343	35140	169478	92593	160911	99253	33926	30647	5505		19432	12201.2	21276.6	24114.4	15315.6	34225.7	5940.24	6061.86	5399.4
CDS	peg.41	Q7A_41	43280	43765	486	+	hypothetical protein	hypothetical protein; AFI82902.1	8489	5687	10051	8141	5004	11826	1929	1931	1807	CDS	peg.40	43331	43816	486	+	hypothetical protein	CDW43_RS00195	CDW43_RS00195	chemotaxis protein CheW	chemotaxis protein CheW			2686	2466	14379	6114	10987	7489	2466	2131	376		17467.1	11701.6	20681.1	16751	10296.3	24333.3	3969.14	3973.25	3718.11
CDS	peg.42	Q7A_42	43775	45718	1944	+	Soluble lytic murein transglycosylase precursor (EC 3.2.1.-)	transglycosylase; AFI82903.1	27318	14132	25439	15814	13071	29654	9131	7578	7932	CDS	peg.41	43826	45769	1944	+	Soluble lytic murein transglycosylase precursor (EC 3.2.1.-)	CDW43_RS00200	CDW43_RS00200	transglycosylase SLT domain-containing protein	transglycosylase SLT domain-containing protein			9401	7493	25268	8653	16203	10659	11282	8705	1470		14052.5	7269.55	13085.9	8134.77	6723.77	15254.1	4697.02	3898.15	4080.25
CDS	peg.43	Q7A_43	45728	46969	1242	+	tRNA nucleotidyltransferase (EC 2.7.7.21) (EC 2.7.7.25)	multifunctional CCA tRNA nucleotidyl transferase/2'3'-cyclic phosphodiesterase/2'nucleotidase/phosphatase; AFI82904.1	18919	10495	18026	13404	12460	22695	10155	11336	11587	CDS	peg.42	45779	47020	1242	+	tRNA nucleotidyltransferase (EC 2.7.7.21) (EC 2.7.7.25)	CDW43_RS00205	CDW43_RS00205	multifunctional CCA addition/repair protein	multifunctional CCA addition/repair protein			6863	5427	13862	8658	12465	7231	7762	7575	1377		15232.7	8450.08	14513.7	10792.3	10032.2	18272.9	8176.33	9127.21	9329.31
CDS	peg.44	Q7A_44	47032	48015	984	+	N(5),N(10)-methenyltetrahydromethanopterin cyclohydrolase (EC 3.5.4.27)	methenyltetrahydromethanopterin cyclohydrolase; AFI82905.1	24080	15509	23552	15809	13899	27960	18717	17116	18281	CDS	peg.43	47083	48066	984	+	N(5),N(10)-methenyltetrahydromethanopterin cyclohydrolase (EC 3.5.4.27)	CDW43_RS00210	CDW43_RS00210	methenyltetrahydromethanopterin cyclohydrolase	methenyltetrahydromethanopterin cyclohydrolase			7916	7138	18845	11709	17318	9772	15930	14270	3033		24471.5	15761.2	23935	16066.1	14125	28414.6	19021.3	17394.3	18578.3
CDS	peg.45	Q7A_45	48025	48951	927	+	Possible glutaminyl transferase clustered with tetrahydromethanopterin biosynthesis genes	RimK family alpha-L-glutamate ligase; AFI82906.1	17224	10818	17107	13393	11323	21611	11235	10380	11290	CDS	peg.44	48076	49002	927	+	Possible glutaminyl transferase clustered with tetrahydromethanopterin biosynthesis genes	CDW43_RS00215	CDW43_RS00215	RimK family alpha-L-glutamate ligase	RimK family alpha-L-glutamate ligase			6509	5652	12268	7608	11820	6757	8350	6729	1176		18580.4	11669.9	18454.2	14447.7	12214.7	23312.8	12119.7	11197.4	12179.1
CDS	peg.46	Q7A_46	48941	49819	879	+	Triphosphoribosyl-dephospho-CoA synthetase	triphosphoribosyl-dephospho-CoA synthase; AFI82907.1	29695	18079	29512	31099	22021	47491	15629	12795	16071	CDS	peg.45	48992	49870	879	+	Triphosphoribosyl-dephospho-CoA synthetase	CDW43_RS00220	CDW43_RS00220	triphosphoribosyl-dephospho-CoA synthase	triphosphoribosyl-dephospho-CoA synthase			11696	10318	36952	31072	46202	24569	16518	14487	3220		33782.7	20567.7	33574.5	35380	25052.3	54028.4	17780.4	14556.3	18283.3
CDS	peg.47	Q7A_47	49938	50456	519	+	Formaldehyde activating enzyme	formaldehyde-activating enzyme; AFI82908.1	170409	99115	155655	141428	116654	241857	108865	77368	88817	CDS	peg.46	49989	50507	519	+	Formaldehyde activating enzyme	CDW43_RS00225	CDW43_RS00225	formaldehyde-activating enzyme	formaldehyde-activating enzyme			51701	46625	162041	75832	134551	82971	117503	87717	15554		328341	190973	299913	272501	224767	466006	209759	149071	171131
CDS	peg.48	Q7A_48	50498	51193	696	-	Phosphoribosylformimino-5-aminoimidazole carboxamide ribotide isomerase related protein	nickel transporter; AFI82909.2	6693	4636	6801	5908	4572	9787	2825	2416	2200	CDS	peg.47	50549	51244	696	-	Phosphoribosylformimino-5-aminoimidazole carboxamide ribotide isomerase related protein	CDW43_RS00230	CDW43_RS00230	HisA/HisF-related TIM barrel protein	HisA/HisF-related TIM barrel protein			2237	1880	6329	5050	7669	4402	3307	3217	472		9616.38	6660.92	9771.55	8488.51	6568.97	14061.8	4058.91	3471.26	3160.92
CDS	peg.49	#N/A	51216	52211	996	+	COG1821 family protein	#N/A	5435	3338	4806	5028	4276	7866	3779	3826	4335	CDS	peg.48	51354	52262	909	+	COG1821 family protein	#N/A	CDW43_RS00235	#N/A	ATP-grasp domain-containing protein			1861	1637	3871	3555	4970	2497	3713	3834	709		5456.83	3351.41	4825.3	5048.19	4293.17	7897.59	3794.18	3841.37	4352.41
CDS	peg.50	Q7A_51	52204	53247	1044	+	COG1548 family protein	H4MPT-linked C1 transfer pathway protein; AFI82912.1	10443	6737	9584	10112	8530	14488	6588	6560	6899	CDS	peg.49	52255	53298	1044	+	COG1548 family protein	CDW43_RS00240	CDW43_RS00240	H4MPT-linked C1 transfer pathway protein	H4MPT-linked C1 transfer pathway protein			3897	3308	8640	6810	9644	5339	5033	4765	903		10002.9	6453.07	9180.08	9685.82	8170.5	13877.4	6310.34	6283.52	6608.24
CDS	peg.51	Q7A_52	53257	54642	1386	+	Para-aminobenzoate synthase, aminase component (EC 2.6.1.85)	aminodeoxychorismate synthase%2C component I; AFI82913.1	10388	6797	10093	9843	7636	13789	5377	5019	5549	CDS	peg.50	53308	54693	1386	+	Para-aminobenzoate synthase, aminase component (EC 2.6.1.85)	CDW43_RS00245	CDW43_RS00245	aminodeoxychorismate synthase component I	aminodeoxychorismate synthase component I			3665	3127	8759	5695	8559	4941	4031	3901	501		7494.95	4904.04	7282.11	7101.73	5509.38	9948.77	3879.51	3621.21	4003.61
CDS	peg.52	Q7A_53	54643	55218	576	+	delta 1-pyrroline-5-carboxylate synthetase	delta 1-pyrroline-5-carboxylate synthetase; AFI82914.1	4166	2575	3945	3850	3061	5763	2113	1881	2138	CDS	peg.51	54694	55269	576	+	delta 1-pyrroline-5-carboxylate synthetase	CDW43_RS00250	CDW43_RS00250	delta 1-pyrroline-5-carboxylate synthetase	delta 1-pyrroline-5-carboxylate synthetase			1380	1188	3400	2046	3301	1869	1920	1680	254		7232.64	4470.49	6848.96	6684.03	5314.24	10005.2	3668.4	3265.62	3711.81
CDS	peg.53	Q7A_54	55215	56396	1182	+	L-tyrosine decarboxylase (EC 4.1.1.25)	aspartate aminotransferase family protein; AFI82915.1	8341	4470	7357	6553	5097	10472	3894	3737	4045	CDS	peg.52	55266	56447	1182	+	L-tyrosine decarboxylase (EC 4.1.1.25)	CDW43_RS00255	CDW43_RS00255	aminotransferase class V-fold PLP-dependent enzyme	aminotransferase class V-fold PLP-dependent enzyme			2808	2408	6322	2365	4786	2924	3949	3511	512		7056.68	3781.73	6224.2	5543.99	4312.18	8859.56	3294.42	3161.59	3422.17
CDS	peg.54	Q7A_55	56371	58074	1704	-	Pyruvate-flavodoxin oxidoreductase (EC 1.2.7.-)	hypothetical protein; AFI82916.1	26047	14801	24723	16715	13771	28046	6612	5668	6210	CDS	peg.53	56422	58125	1704	-	Pyruvate-flavodoxin oxidoreductase (EC 1.2.7.-)	CDW43_RS00260	CDW43_RS00260	AAA family ATPase	AAA family ATPase			8348	6781	22642	7615	14412	9114	6824	5437	1166		15285.8	8686.03	14508.8	9809.27	8081.57	16458.9	3880.28	3326.29	3644.37
CDS	peg.55	Q7A_56	58083	59171	1089	-	3-dehydroquinate synthase (EC 4.2.3.4)	3-dehydroquinate synthase; AFI82917.1	29485	16662	27087	19647	17741	34272	9961	9114	8936	CDS	peg.54	58134	59222	1089	-	3-dehydroquinate synthase (EC 4.2.3.4)	CDW43_RS00265	#N/A	3-dehydroquinate synthase	#N/A			8843	7746	28030	13769	22275	12477	10773	9303	2802		27075.3	15300.3	24873.3	18041.3	16291.1	31471.1	9146.92	8369.15	8205.69
CDS	peg.56	Q7A_57	59174	59701	528	-	Shikimate kinase I (EC 2.7.1.71)	shikimate kinase I; AFI82918.2	10505	6362	10303	8409	7493	14033	6104	5674	5491	CDS	peg.55	59225	59719	495	-	Shikimate kinase I (EC 2.7.1.71)	CDW43_RS00270	CDW43_RS00270	shikimate kinase AroK	shikimate kinase AroK			3045	2886	11368	6954	10673	5626	5972	5200	1587		19895.8	12049.2	19513.3	15926.1	14191.3	26577.7	11560.6	10746.2	10399.6
CDS	peg.57	Q7A_59	59794	61929	2136	-	Type IV pilus biogenesis protein PilQ	pilus assembly protein PilQ; AFI82920.1	74182	46207	70373	72287	53919	108157	16158	14202	13723	CDS	peg.56	59845	61980	2136	-	Type IV pilus biogenesis protein PilQ	CDW43_RS00275	#N/A	type IV pilus secretin PilQ	#N/A			20782	18526	81305	60821	96730	51837	17355	14995	3640		34729.4	21632.5	32946.2	33842.2	25243	50635.3	7564.61	6648.88	6424.63
CDS	peg.58	Q7A_60	61982	62530	549	-	Type IV pilus biogenesis protein PilP	pilus assembly protein PilP; AFI82921.1	18800	14067	20865	20643	12993	30094	3338	2653	2483	CDS	peg.57	62033	62581	549	-	Type IV pilus biogenesis protein PilP	CDW43_RS00280	CDW43_RS00280	pilus assembly protein PilP	pilus assembly protein PilP			4809	4523	26121	18375	27945	16430	4943	3993	785		34244.1	25623	38005.5	37601.1	23666.7	54816	6080.15	4832.42	4522.77
CDS	peg.59	Q7A_61	62530	63117	588	-	Type IV pilus biogenesis protein PilO	pilus assembly protein PilO; AFI82922.1	19125	14393	20364	22398	13834	30983	4472	3652	3241	CDS	peg.58	62581	63168	588	-	Type IV pilus biogenesis protein PilO	CDW43_RS00285	CDW43_RS00285	type 4a pilus biogenesis protein PilO	type 4a pilus biogenesis protein PilO			5140	4742	26662	19634	29982	16414	5550	4833	1154		32525.5	24477.9	34632.7	38091.8	23527.2	52692.2	7605.44	6210.88	5511.9
CDS	peg.60	Q7A_62	63120	63680	561	-	Type IV pilus biogenesis protein PilN	pilus assembly protein PilN; AFI82923.1	15623	12737	17555	19730	13322	28366	4420	3614	3388	CDS	peg.59	63171	63731	561	-	Type IV pilus biogenesis protein PilN	CDW43_RS00290	CDW43_RS00290	PilN domain-containing protein	PilN domain-containing protein			4416	4554	20297	18920	26249	14292	6747	6184	1594		27848.5	22704.1	31292.3	35169.3	23746.9	50563.3	7878.79	6442.07	6039.22
CDS	peg.61	Q7A_63	63680	64738	1059	-	Type IV pilus biogenesis protein PilM	pilus assembly protein PilM; AFI82924.1	30993	20924	30181	34540	27104	48407	9334	7368	6993	CDS	peg.60	63731	64789	1059	-	Type IV pilus biogenesis protein PilM	CDW43_RS00295	CDW43_RS00295	pilus assembly protein PilM	pilus assembly protein PilM			11681	9993	34843	33193	45536	23189	13810	13654	4411		29266.3	19758.3	28499.5	32615.7	25594	45710.1	8813.98	6957.51	6603.4
CDS	peg.62	Q7A_64	64939	67326	2388	+	Multimodular transpeptidase-transglycosylase (EC 2.4.1.129) (EC 3.4.-.-)	peptidase; AFI82925.2	27849	17177	26398	15118	13232	29557	22590	32603	44432	CDS	peg.61	64990	67377	2388	+	Multimodular transpeptidase-transglycosylase (EC 2.4.1.129) (EC 3.4.-.-)	#N/A	CDW43_RS00300	#N/A	penicillin-binding protein 1A			8301	7562	23173	9672	16653	10646	21794	22121	3534		11662.1	7193.05	11054.4	6330.82	5541.04	12377.3	9459.8	13652.8	18606.4
CDS	peg.63	Q7A_65	67474	68571	1098	-	Methyl-accepting chemotaxis protein	chemotaxis protein; AFI82926.1	9812	5313	8823	9327	8884	12707	120572	181792	200832	CDS	peg.62	67525	68622	1098	-	Methyl-accepting chemotaxis protein	CDW43_RS16555	#N/A	CZB domain-containing protein	#N/A			3751	3243	7283	13317	15326	7564	21387	58775	18640		8936.25	4838.8	8035.52	8494.54	8091.07	11572.9	109811	165566	182907
CDS	peg.64	Q7A_66	68648	69817	1170	+	NnrS protein involved in response to NO	NnrS family protein; AFI82927.1	7561	4155	6602	11451	10017	12430	30321	46618	51108	CDS	peg.63	68699	69868	1170	+	NnrS protein involved in response to NO	#N/A	CDW43_RS00310	#N/A	NnrS family protein			4029	3132	6562	10458	12892	6081	8980	19026	5398		6462.39	3551.28	5642.74	9787.18	8561.54	10623.9	25915.4	39844.4	43682.1
CDS	peg.65	Q7A_67	69827	70264	438	+	Nitrite-sensitive transcriptional repressor NsrR	Rrf2 family transcriptional regulator; AFI82928.1	10905	6511	10100	13169	11293	16171	33106	50800	50171	CDS	peg.64	69878	70315	438	+	Nitrite-sensitive transcriptional repressor NsrR	CDW43_RS00315	CDW43_RS00315	Rrf2 family transcriptional regulator	Rrf2 family transcriptional regulator			5448	4290	9712	14082	17966	9401	14300	27587	8806		24897.3	14865.3	23059.4	30066.2	25783.1	36920.1	75584.5	115982	114546
CDS	peg.66	Q7A_68	70286	70960	675	-	Nitric oxide-dependent regulator DnrN or NorA	iron-sulfur cluster repair di-iron protein; AFI82929.1	9477	5348	8865	10864	9625	14228	84321	115900	103419	CDS	peg.65	70337	71011	675	-	Nitric oxide-dependent regulator DnrN or NorA	CDW43_RS00320	CDW43_RS00320	iron-sulfur cluster repair protein YtfE	iron-sulfur cluster repair protein YtfE			4144	3548	7749	17773	21287	9984	27080	63623	36036		14040	7922.96	13133.3	16094.8	14259.3	21078.5	124920	171704	153213
CDS	peg.67	#N/A	71393	71518	126	+	hypothetical protein	#N/A	4351	2305	3555	3098	2820	5341	1556	1646	1844	CDS	peg.66	71444	71569	126	+	hypothetical protein	#N/A	#N/A	#N/A	#N/A			1115	871	3476	2360	3741	1892	1357	1432	311		34531.7	18293.7	28214.3	24587.3	22381	42388.9	12349.2	13063.5	14634.9
CDS	peg.68	Q7A_70	71849	73324	1476	-	Putative Zn-dependent protease	peptidase; AFI82931.1	36664	21379	32798	29473	25753	48856	14996	12902	14142	CDS	peg.67	71900	73375	1476	-	Putative Zn-dependent protease	CDW43_RS00325	CDW43_RS00325	M48 family metalloprotease	M48 family metalloprotease			13714	11446	28734	22205	29466	15643	24986	18487	3326		24840.1	14484.4	22220.9	19968.2	17447.8	33100.3	10159.9	8741.19	9581.3
CDS	peg.69	Q7A_71	73352	73552	201	-	LSU ribosomal protein L31p	50S ribosomal protein L31; AFI82932.1	30509	15063	25340	14415	13132	27075	16076	14765	16138	CDS	peg.68	73403	73603	201	-	LSU ribosomal protein L31p	CDW43_RS00330	CDW43_RS00330	50S ribosomal protein L31	50S ribosomal protein L31			9848	8923	21093	14047	18735	11111	32227	24770	3781		151786	74940.3	126070	71716.4	65333.3	134701	79980.1	73457.7	80288.6
CDS	peg.70	Q7A_72	73676	74251	576	-	Putative SAM-dependent methyltransferase Bucepa02006346	SAM-dependent methyltransferase; AFI82933.2	5737	3182	5101	5120	5565	8982	3369	3077	3006	CDS	peg.69	73727	74305	579	-	Putative SAM-dependent methyltransferase Bucepa02006346	CDW43_RS00335	CDW43_RS00335	methyltransferase domain-containing protein	methyltransferase domain-containing protein			1725	1623	4766	4557	5757	2654	2292	2502	704		9960.07	5524.31	8855.9	8888.89	9661.46	15593.8	5848.96	5342.01	5218.75
CDS	peg.71	Q7A_73	74251	75702	1452	-	Potassium uptake protein TrkH	potassium transporter; AFI82934.1	10297	4505	7437	5481	5598	10252	7214	6294	6139	CDS	peg.70	74302	75753	1452	-	Potassium uptake protein TrkH	CDW43_RS00340	CDW43_RS00340	TrkH family potassium uptake protein	TrkH family potassium uptake protein			3967	2916	6400	4524	6040	2853	5190	4860	1335		7091.6	3102.62	5121.9	3774.79	3855.37	7060.61	4968.32	4334.71	4227.96
CDS	peg.72	Q7A_74	75709	77220	1512	-	Apolipoprotein N-acyltransferase (EC 2.3.1.-) / Copper homeostasis protein CutE	apolipoprotein N-acyltransferase; AFI82935.1	16257	8489	14170	9172	8273	15954	6137	5528	6123	CDS	peg.71	75760	77271	1512	-	Apolipoprotein N-acyltransferase (EC 2.3.1.-) / Copper homeostasis protein CutE	CDW43_RS00345	CDW43_RS00345	apolipoprotein N-acyltransferase	apolipoprotein N-acyltransferase			5910	4584	10096	5374	8362	4975	5970	4669	1007		10752	5614.42	9371.69	6066.14	5471.56	10551.6	4058.86	3656.08	4049.6
CDS	peg.73	Q7A_75	77220	78089	870	-	Magnesium and cobalt efflux protein CorC	magnesium/cobalt efflux protein; AFI82936.1	18907	10703	17362	10125	8450	17368	4845	4316	4288	CDS	peg.72	77271	78140	870	-	Magnesium and cobalt efflux protein CorC	CDW43_RS00350	CDW43_RS00350	CBS domain-containing protein	CBS domain-containing protein			6775	5628	12464	6719	10107	6042	5013	3834	881		21732.2	12302.3	19956.3	11637.9	9712.64	19963.2	5568.97	4960.92	4928.74
CDS	peg.74	Q7A_76	78086	78550	465	-	Metal-dependent hydrolase YbeY, involved in rRNA and/or ribosome maturation and assembly	rRNA maturation RNase YbeY; AFI82937.1	7189	4744	7856	5245	4244	8553	2352	2033	2150	CDS	peg.73	78137	78601	465	-	Metal-dependent hydrolase YbeY, involved in rRNA and/or ribosome maturation and assembly	CDW43_RS00355	CDW43_RS00355	rRNA maturation RNase YbeY	rRNA maturation RNase YbeY			2552	2199	5597	3018	4299	2779	3062	2334	564		15460.2	10202.2	16894.6	11279.6	9126.88	18393.5	5058.06	4372.04	4623.66
CDS	peg.75	Q7A_77	78547	79521	975	-	Phosphate starvation-inducible protein PhoH, predicted ATPase	PhoH family protein; AFI82938.1	22546	13469	21503	14187	12537	23928	9316	8933	8719	CDS	peg.74	78598	79572	975	-	Phosphate starvation-inducible protein PhoH, predicted ATPase	CDW43_RS00360	#N/A	PhoH family protein	#N/A			10001	7809	14208	8714	12467	7264	11219	8920	2060		23124.1	13814.4	22054.4	14550.8	12858.5	24541.5	9554.87	9162.05	8942.56
CDS	peg.76	Q7A_78	79543	80910	1368	-	tRNA-i(6)A37 methylthiotransferase	tRNA (N6-isopentenyl adenosine(37)-C2)-methylthiotransferase MiaB; AFI82939.2	25723	15018	24873	10661	10077	22526	11177	9867	10691	CDS	peg.75	79594	80961	1368	-	tRNA-i(6)A37 methylthiotransferase	CDW43_RS00365	#N/A	tRNA (N6-isopentenyl adenosine(37)-C2)-methylthiotransferase MiaB	#N/A			10061	9185	13361	4958	8422	5313	21807	15854	2331		18803.4	10978.1	18182	7793.13	7366.23	16466.4	8170.32	7212.72	7815.06
CDS	peg.77	#N/A	80892	81008	117	-	hypothetical protein	#N/A	827	628	837	911	767	1375	874	1003	947	CDS	peg.76	80943	81059	117	-	hypothetical protein	#N/A	#N/A	#N/A	#N/A			327	277	754	696	895	515	1230	1070	195		7068.38	5367.52	7153.85	7786.32	6555.56	11752.1	7470.09	8572.65	8094.02
CDS	peg.78	#N/A	81060	81191	132	-	hypothetical protein	#N/A	878	628	980	880	754	1497	1531	1657	1582	CDS	peg.77	81111	81227	117	-	hypothetical protein	#N/A	#N/A	#N/A	#N/A			310	286	941	844	1022	573	1639	1429	188		6651.52	4757.58	7424.24	6666.67	5712.12	11340.9	11598.5	12553	11984.8
CDS	peg.79	#N/A	81304	81435	132	-	hypothetical protein	#N/A	4362	2409	4183	3124	2324	4928	1892	1970	2061	CDS	peg.78	81355	81486	132	-	hypothetical protein	#N/A	#N/A	#N/A	#N/A			1436	1183	4763	3948	5333	2976	2211	1854	432		33045.5	18250	31689.4	23666.7	17606.1	37333.3	14333.3	14924.2	15613.6
CDS	peg.80	Q7A_81	81472	81906	435	+	hypothetical protein	glycolate utilization protein; AFI82942.1	17905	10265	14968	14027	14185	23863	9077	8152	8211	CDS	peg.79	81523	81957	435	+	hypothetical protein	CDW43_RS00370	CDW43_RS00370	heme-binding protein	heme-binding protein			7931	5930	13841	12453	16295	8239	8122	7838	2851		41160.9	23597.7	34409.2	32246	32609.2	54857.5	20866.7	18740.2	18875.9
CDS	peg.81	Q7A_82	82040	82798	759	-	Fibronectin type III domain protein	PEP-CTERM sorting domain-containing protein; AFI82943.1	63896	46322	55889	59279	69214	100836	27510	28012	24744	CDS	peg.80	82091	82849	759	-	Fibronectin type III domain protein	CDW43_RS00375	CDW43_RS00375	thrombospondin	thrombospondin			27359	25923	45117	41696	51963	25548	25256	26803	6801		84184.5	61030.3	73635	78101.4	91191	132854	36245.1	36906.5	32600.8
ribow		0	82816	82895	80	-	cyclic di-GMP riboswitch class I	cyclic di-GMP riboswitch class I	11827	8232	10099	10000	11921	18659	3731	3563	3586	Ribosw		82866	82945	80	-	cyclic di-GMP riboswitch class I	#N/A	#N/A	#N/A	#N/A			4981	4723	8731	8432	10416	4945	3926	4171	1106		147838	102900	126238	125000	149012	233238	46637.5	44537.5	44825
CDS		#N/A	82848	83060	213	+	Protein of unknown function DUF181	#N/A	9734	6692	8243	8011	9566	15454	3333	3128	3196	CDS	peg.81	82899	83111	213	+	Protein of unknown function DUF181	#N/A	#N/A	#N/A	#N/A			4122	3778	7212	6864	8589	4163	3597	3750	989		45699.5	31417.8	38699.5	37610.3	44910.8	72554	15647.9	14685.4	15004.7
CDS	peg.82	Q7A_83	83110	84852	1743	+	Protein of unknown function DUF181	30s ribosomal protein S12 methylthiotransferase accessory protein YcaO; AFI82944.1	25802	15234	22877	27436	27149	40508	21163	18101	18885	CDS	peg.81	83161	84903	1743	+	Protein of unknown function DUF181	#N/A	#N/A	#N/A	#N/A			9554	7864	21126	16301	22144	11696	11610	13977	2390		14803.2	8740.1	13125.1	15740.7	15576	23240.4	12141.7	10385	10834.8
CDS	peg.83	Q7A_84	84936	86510	1575	-	putative Glutathione-regulated potassium-efflux system protein KefB	potassium transporter Kef; AFI82945.1	10395	6728	9911	12769	11010	17240	7987	7875	7977	CDS	peg.82	84987	86561	1575	-	putative Glutathione-regulated potassium-efflux system protein KefB	CDW43_RS00385	CDW43_RS00385	cation:proton antiporter	cation:proton antiporter			4330	3589	11095	11696	14739	7198	4154	5606	1270		6600	4271.75	6292.7	8107.3	6990.48	10946	5071.11	5000	5064.76
CDS	peg.84	Q7A_85	86666	86962	297	-	hypothetical protein	DUF1840 domain-containing protein; AFI82946.1	2670	1738	2602	2817	2263	4098	1263	1437	1460	CDS	peg.83	86717	87013	297	-	hypothetical protein	CDW43_RS00390	CDW43_RS00390	DUF1840 domain-containing protein	DUF1840 domain-containing protein			948	756	2816	3112	3857	2009	971	1184	320		8989.9	5851.85	8760.94	9484.85	7619.53	13798	4252.53	4838.38	4915.82
CDS	peg.85	Q7A_87	87210	87530	321	-	hypothetical protein	hypothetical protein; AFI82948.1	2839	1982	3111	3002	2485	4528	2215	2598	2472	CDS	peg.84	87261	87581	321	-	hypothetical protein	CDW43_RS00395	CDW43_RS00395	hypothetical protein	hypothetical protein			1200	962	3590	4422	5537	2739	1805	1997	610		8844.24	6174.45	9691.59	9352.02	7741.43	14105.9	6900.31	8093.46	7700.93
CDS	peg.86	Q7A_88	87647	87919	273	-	Uncharacterized protein/domain, possibly involved in tellurite resistance	tellurite resistance protein; AFI82949.1	3775	2788	4013	3344	2783	5033	2459	2609	2546	CDS	peg.85	87698	87973	276	-	Uncharacterized protein/domain, possibly involved in tellurite resistance	CDW43_RS00400	CDW43_RS00400	DUF1971 domain-containing protein	DUF1971 domain-containing protein			1819	1488	5360	6219	7595	3993	2167	2433	799		13827.8	10212.5	14699.6	12249.1	10194.1	18435.9	9007.33	9556.78	9326.01
CDS	peg.87	Q7A_89	88055	88666	612	-	Hypothetical protein VC0266 (sugar utilization related?)	IclR family transcriptional regulator; AFI82950.1	3589	2251	3211	4030	4460	6143	2296	2738	2752	CDS	peg.86	88106	88717	612	-	Hypothetical protein VC0266 (sugar utilization related?)	CDW43_RS00405	CDW43_RS00405	uracil-DNA glycosylase family protein	uracil-DNA glycosylase family protein			2132	1557	3483	6822	6507	2889	1482	2066	617		5864.38	3678.1	5246.73	6584.97	7287.58	10037.6	3751.63	4473.86	4496.73
CDS	peg.88	Q7A_90	88707	88961	255	-	hypothetical protein	hypothetical protein; AFI82951.1	2005	1299	1688	1733	2477	3063	2042	2404	2306	CDS	peg.87	88758	89012	255	-	hypothetical protein	CDW43_RS00410	CDW43_RS00410	DUF1488 family protein	DUF1488 family protein			1152	899	1708	4373	3909	1542	1078	1532	692		7862.75	5094.12	6619.61	6796.08	9713.73	12011.8	8007.84	9427.45	9043.14
CDS	peg.89	Q7A_91	89148	90434	1287	+	FIG00785332: hypothetical protein	hypothetical protein; AFI82952.1	5776	3807	5533	5552	4868	8102	3692	3676	3871	CDS	peg.88	89199	90485	1287	+	FIG00785332: hypothetical protein	CDW43_RS00415	CDW43_RS00415	MgtC/SapB family protein	MgtC/SapB family protein			2835	2457	5585	5185	6708	3494	3083	3495	672		4487.96	2958.04	4299.15	4313.91	3782.44	6295.26	2868.69	2856.25	3007.77
CDS	peg.90	Q7A_92	90674	92137	1464	-	conserved hypothetical protein putative phospholipase D endonuclease domain	phospholipase; AFI82953.1	7360	4302	6754	6177	5944	9971	5696	5608	5768	CDS	peg.89	90724	92187	1464	-	conserved hypothetical protein putative phospholipase D endonuclease domain	CDW43_RS00420	CDW43_RS00420	phospholipase D family protein	phospholipase D family protein			3643	2887	6334	6285	8756	4528	4613	4833	1352		5027.32	2938.52	4613.39	4219.26	4060.11	6810.79	3890.71	3830.6	3939.89
CDS	peg.91	#N/A	92449	94287	1839	+	FIG00877238: hypothetical protein	#N/A	7173	5610	8276	7530	6329	11328	3625	3468	3765	CDS	peg.90	92421	94337	1917	+	FIG00877238: hypothetical protein	#N/A	CDW43_RS00425	#N/A	metallophosphoesterase			2533	2489	8208	7631	9813	5494	2837	3101	1061		3900.49	3050.57	4500.27	4094.62	3441.54	6159.87	1971.18	1885.81	2047.31
CDS	peg.92	Q7A_94	94503	95558	1056	+	Phosphate ABC transporter, periplasmic phosphate-binding protein PstS (TC 3.A.1.7.1)	phosphate ABC transporter substrate-binding protein PstS; AFI82955.1	2712	1830	2799	2876	2325	3941	1755	1870	2167	CDS	peg.91	94553	95608	1056	+	Phosphate ABC transporter, periplasmic phosphate-binding protein PstS (TC 3.A.1.7.1)	CDW43_RS00430	CDW43_RS00430	phosphate ABC transporter substrate-binding protein PstS	phosphate ABC transporter substrate-binding protein PstS			1070	910	3033	2169	2841	1719	1485	1685	498		2568.18	1732.95	2650.57	2723.48	2201.7	3732.01	1661.93	1770.83	2052.08
CDS	peg.93	Q7A_95	95620	96627	1008	-	Ribonuclease BN (EC 3.1.-.-)	YihY/virulence factor BrkB family protein; AFI82956.1	2535	1694	2694	2955	2604	4173	1980	2122	2356	CDS	peg.92	95670	96677	1008	-	Ribonuclease BN (EC 3.1.-.-)	CDW43_RS00435	CDW43_RS00435	YihY/virulence factor BrkB family protein	YihY/virulence factor BrkB family protein			1056	935	2416	2164	2867	1628	1308	1686	331		2514.88	1680.56	2672.62	2931.55	2583.33	4139.88	1964.29	2105.16	2337.3
CDS	peg.94	Q7A_03125	96695	96913	219	-	hypothetical protein	hypothetical protein; ASF49047.1	1062	634	1039	1003	807	1594	970	992	1086	CDS	peg.93	96745	96963	219	-	hypothetical protein	CDW43_RS00440	#N/A	DUF1801 domain-containing protein	#N/A			306	284	1197	826	1236	666	934	984	212		4849.32	2894.98	4744.29	4579.91	3684.93	7278.54	4429.22	4529.68	4958.9
CDS	peg.95	Q7A_97	97264	98208	945	-	Malate dehydrogenase (EC 1.1.1.37)	malate dehydrogenase; AFI82958.1	3909	2558	3669	3571	3372	5903	2283	2517	2492	CDS	peg.94	97314	98258	945	-	Malate dehydrogenase (EC 1.1.1.37)	CDW43_RS00445	#N/A	malate dehydrogenase	#N/A			1515	1246	4434	3939	5250	2792	1670	1800	615		4136.51	2706.88	3882.54	3778.84	3568.25	6246.56	2415.87	2663.49	2637.04
CDS	peg.96	Q7A_98	98312	98575	264	-	hypothetical protein	hypothetical protein; AFI82959.1	1728	1194	1689	1554	1381	2678	942	948	1017	CDS	peg.95	98362	98625	264	-	hypothetical protein	CDW43_RS00450	#N/A	hypothetical protein	#N/A			606	575	1947	1272	1935	886	791	798	278		6545.45	4522.73	6397.73	5886.36	5231.06	10143.9	3568.18	3590.91	3852.27
CDS	peg.97	Q7A_99	98826	99341	516	-	hypothetical protein	hypothetical protein; AFI82960.2	1975	1362	2308	2290	1839	3543	1620	1994	2207	CDS	peg.96	98876	99391	516	-	hypothetical protein	CDW43_RS00455	#N/A	hypothetical protein	#N/A			997	780	2799	1531	2452	1449	1739	1855	545		3827.52	2639.53	4472.87	4437.98	3563.95	6866.28	3139.53	3864.34	4277.13
CDS	peg.98	Q7A_100	99518	100033	516	-	Protoporphyrinogen IX oxidase, novel form, HemJ (EC 1.3.-.-)	hypothetical protein; AFI82961.1	2349	1405	2233	2410	2021	3554	2187	2154	2572	CDS	peg.97	99568	100083	516	-	Protoporphyrinogen IX oxidase, novel form, HemJ (EC 1.3.-.-)	CDW43_RS00460	CDW43_RS00460	phosphate-starvation-inducible PsiE family protein	phosphate-starvation-inducible PsiE family protein			1056	819	2627	1672	2561	1398	1965	2058	509		4552.33	2722.87	4327.52	4670.54	3916.67	6887.6	4238.37	4174.42	4984.5
CDS	peg.99	Q7A_101	100234	100842	609	-	Uncharacterized protein conserved in bacteria	MOSC domain-containing protein; AFI82962.1	4206	2430	4221	6131	4290	7636	3830	3961	4428	CDS	peg.98	100284	100892	609	-	Uncharacterized protein conserved in bacteria	CDW43_RS00465	#N/A	MOSC domain-containing protein	#N/A			2040	1918	6354	4545	6921	4012	2555	2736	531		6906.4	3990.15	6931.03	10067.3	7044.33	12538.6	6289	6504.11	7270.94
CDS	peg.100	#N/A	100831	100977	147	+	hypothetical protein	#N/A	1323	773	1308	1979	1256	2308	1455	1519	1601	CDS	peg.99	100881	101027	147	+	hypothetical protein	#N/A	#N/A	#N/A	#N/A			635	590	2395	1673	2568	1514	991	1075	174		9000	5258.5	8897.96	13462.6	8544.22	15700.7	9897.96	10333.3	10891.2
CDS	peg.102	Q7A_103	101511	102674	1164	-	putative cytochrome P450 hydroxylase	cytochrome P450; AFI82964.1	28872	18578	27668	39303	27922	46496	22419	25529	25253	CDS	peg.100	101548	102711	1164	-	putative cytochrome P450 hydroxylase	CDW43_RS00470	CDW43_RS00470	cytochrome P450	cytochrome P450			9845	9289	28877	29630	40177	20854	11489	13168	3110		24804.1	15960.5	23769.8	33765.5	23988	39945	19260.3	21932.1	21695
CDS	peg.103	Q7A_104	103180	103854	675	+	DNA repair protein RadC	hypothetical protein; AFI82965.1	3317	1971	4026	3747	2735	5492	3983	4160	5087	CDS	peg.102	103206	103880	675	+	DNA repair protein RadC	CDW43_RS00475	CDW43_RS00475	DNA repair protein RadC	DNA repair protein RadC			1219	973	3215	2110	3377	2092	1078	1306	555		4914.07	2920	5964.44	5551.11	4051.85	8136.3	5900.74	6162.96	7536.3
CDS	peg.104	Q7A_105	103981	104601	621	+	Outer membrane receptor proteins, mostly Fe transport	TonB-dependent receptor;pseudo=true	1599	1511	1912	2486	1810	8812	2166	2013	2469	CDS	peg.103	104040	105041	1002	+	TonB-dependent receptor	#N/A	CDW43_RS16565	#N/A	TonB-dependent receptor			1937	1487	2304	1491	2228	1110	1994	2095	8128		2574.88	2433.17	3078.9	4003.22	2914.65	14190	3487.92	3241.55	3975.85
CDS	peg.105	Q7A_105	104821	106017	1197	+	TonB-dependent receptor	pseudogene	1835	1698	2182	2974	2531	7885	3439	3343	4155	CDS	peg.104	105060	106043	984	+	TonB-dependent receptor	CDW43_RS16570	CDW43_RS16570	TonB-dependent receptor	TonB-dependent receptor			1030	839	1637	1584	2084	972	1386	1828	1610		1533	1418.55	1822.89	2484.54	2114.45	6587.3	2873.02	2792.82	3471.18
CDS	peg.106	Q7A_107	106089	107225	1137	+	Uncharacterized iron-regulated membrane protein Iron-uptake factor PiuB	PepSY domain-containing protein; AFI82966.1	3562	2439	3426	3969	3293	6661	4038	3846	5158	CDS	peg.105	106115	107251	1137	+	Uncharacterized iron-regulated membrane protein Iron-uptake factor PiuB	CDW43_RS00485	CDW43_RS00485	PepSY domain-containing protein	PepSY domain-containing protein			2180	2078	3985	3934	5685	2835	2214	2998	824		3132.81	2145.12	3013.19	3490.77	2896.22	5858.4	3551.45	3382.59	4536.5
CDS	peg.107	Q7A_108	107234	107968	735	-	Ni,Fe-hydrogenase I cytochrome b subunit	cytochrome B; AFI82967.1	9682	6491	8145	7624	7202	13590	7884	7520	9833	CDS	peg.106	107260	107994	735	-	Ni,Fe-hydrogenase I cytochrome b subunit	CDW43_RS00490	CDW43_RS00490	cytochrome b/b6 domain-containing protein	cytochrome b/b6 domain-containing protein			5696	4689	12826	12347	17937	7925	5156	5147	1956		13172.8	8831.29	11081.6	10372.8	9798.64	18489.8	10726.5	10231.3	13378.2
CDS	peg.108	Q7A_109	108066	108497	432	-	hypothetical protein	chemotaxis protein; AFI82968.1	5399	4131	5957	4214	3447	8380	4039	3922	4536	CDS	peg.107	108092	108523	432	-	hypothetical protein	CDW43_RS00495	CDW43_RS00495	chemotaxis protein	chemotaxis protein			2421	1901	5575	3393	5122	2929	2881	2724	740		12497.7	9562.5	13789.4	9754.63	7979.17	19398.1	9349.54	9078.7	10500
CDS	peg.109	Q7A_110	108499	109332	834	-	Thymidylate synthase (EC 2.1.1.45)	thymidylate synthase; AFI82969.1	11358	7771	11749	9882	8149	18132	8769	8424	8709	CDS	peg.108	108525	109358	834	-	Thymidylate synthase (EC 2.1.1.45)	CDW43_RS00500	CDW43_RS00500	thymidylate synthase	thymidylate synthase			3449	3171	9037	4947	8327	4524	5024	4794	1504		13618.7	9317.75	14087.5	11848.9	9770.98	21741	10514.4	10100.7	10442.4
CDS	peg.110	Q7A_111	109460	110398	939	-	Response regulator of zinc sigma-54-dependent two-component system	sigma-54-dependent Fis family transcriptional regulator; AFI82970.1	8340	5296	7716	8467	6735	16780	9252	8865	9232	CDS	peg.109	109486	110424	939	-	Response regulator of zinc sigma-54-dependent two-component system	CDW43_RS00505	CDW43_RS00505	sigma-54 dependent transcriptional regulator	sigma-54 dependent transcriptional regulator			3262	2771	7751	4303	6647	3830	4973	5179	1810		8881.79	5640.04	8217.25	9017.04	7172.52	17870.1	9853.04	9440.89	9831.74
CDS	peg.111	Q7A_112	110441	111169	729	-	Heavy-metal-associated domain (N-terminus) and membrane-bounded cytochrome biogenesis cycZ-like domain, possible membrane copper tolerance protein	sulfite exporter TauE/SafE family protein; AFI82971.1	7177	4153	6238	7088	5516	12593	5384	4954	5154	CDS	peg.110	110467	111195	729	-	Heavy-metal-associated domain (N-terminus) and membrane-bounded cytochrome biogenesis cycZ-like domain, possible membrane copper tolerance protein	CDW43_RS00510	CDW43_RS00510	sulfite exporter TauE/SafE family protein	sulfite exporter TauE/SafE family protein			2720	2264	6415	4593	6480	3391	3073	3167	1439		9844.99	5696.84	8556.93	9722.91	7566.53	17274.3	7385.46	6795.61	7069.96
CDS	peg.112	#N/A	111229	111396	168	+	hypothetical protein	#N/A	4033	4424	4080	16395	7713	36134	22082	20847	29117	CDS	peg.111	111255	111422	168	+	hypothetical protein	#N/A	#N/A	#N/A	#N/A			3096	2295	4016	3240	4229	2325	1832	3046	8980		24006	26333.3	24285.7	97589.3	45910.7	215083	131440	124089	173315
CDS	peg.113	Q7A_113	111598	112002	405	+	Cytochrome c-555 precursor (Cytochrome c555)	cytochrome C; AFI82972.1	4586	4668	3928	14263	7691	42184	42409	38517	49959	CDS	peg.112	111624	112028	405	+	Cytochrome c-555 precursor (Cytochrome c555)	CDW43_RS00515	CDW43_RS00515	cytochrome c	cytochrome c			3309	2515	3646	3571	4151	1865	3489	3966	24821		11323.5	11525.9	9698.77	35217.3	18990.1	104158	104714	95103.7	123356
CDS	peg.114	Q7A_114	112051	112584	534	-	hypothetical protein	hypothetical protein; AFI82973.2	5977	5336	6195	11996	7183	26917	25703	23846	33761	CDS	peg.113	112077	112610	534	-	hypothetical protein	CDW43_RS00520	CDW43_RS00520	hypothetical protein	hypothetical protein			2752	2303	5482	5061	6100	3336	2826	2917	7456		11192.9	9992.51	11601.1	22464.4	13451.3	50406.4	48133	44655.4	63222.8
CDS	peg.115	Q7A_115	112640	114145	1506	-	Exopolyphosphatase (EC 3.6.1.11)	exopolyphosphatase; AFI82974.1	15531	9741	15190	9475	8770	18386	14642	13277	19326	CDS	peg.114	112666	114171	1506	-	Exopolyphosphatase (EC 3.6.1.11)	CDW43_RS00525	CDW43_RS00525	exopolyphosphatase	exopolyphosphatase			6150	5540	12622	5714	9001	5687	7452	6370	2482		10312.7	6468.13	10086.3	6291.5	5823.37	12208.5	9722.44	8816.07	12832.7
CDS	peg.116	Q7A_116	114280	114996	717	-	Phosphate transport system regulatory protein PhoU	phosphate transport system regulatory protein PhoU; AFI82975.1	9787	6147	9198	7920	6317	11661	5462	5724	5896	CDS	peg.115	114306	115022	717	-	Phosphate transport system regulatory protein PhoU	CDW43_RS00530	CDW43_RS00530	phosphate signaling complex protein PhoU	phosphate signaling complex protein PhoU			2952	2713	8407	6665	9389	4910	3989	4149	750		13649.9	8573.22	12828.5	11046	8810.32	16263.6	7617.85	7983.26	8223.15
CDS	peg.117	Q7A_117	115020	115862	843	-	Phosphate transport ATP-binding protein PstB (TC 3.A.1.7.1)	phosphate ABC transporter ATP-binding protein; AFI82976.1	7964	5527	8155	6710	5127	9980	3626	3737	3677	CDS	peg.116	115046	115888	843	-	Phosphate transport ATP-binding protein PstB (TC 3.A.1.7.1)	CDW43_RS00535	#N/A	phosphate ABC transporter ATP-binding protein PstB	#N/A			2274	2199	7943	5696	8573	4744	2922	3155	587		9447.21	6556.35	9673.78	7959.67	6081.85	11838.7	4301.3	4432.98	4361.8
CDS	peg.118	Q7A_118	115862	117529	1668	-	Phosphate transport system permease protein PstA (TC 3.A.1.7.1)	phosphate ABC transporter%2C permease protein PstA; AFI82977.1	8567	5060	7424	7652	6556	10515	4893	5782	5759	CDS	peg.117	115888	117555	1668	-	Phosphate transport system permease protein PstA (TC 3.A.1.7.1)	CDW43_RS00540	CDW43_RS00540	phosphate ABC transporter permease PstA	phosphate ABC transporter permease PstA			3076	2633	7315	5964	8397	4533	3573	3878	769		5136.09	3033.57	4450.84	4587.53	3930.46	6303.96	2933.45	3466.43	3452.64
CDS	peg.119	Q7A_119	117542	119818	2277	-	Phosphate transport system permease protein PstC (TC 3.A.1.7.1)	phosphate ABC transporter permease; AFI82978.1	11591	7369	9937	12855	11377	15141	9136	11092	11017	CDS	peg.118	117568	119844	2277	-	Phosphate transport system permease protein PstC (TC 3.A.1.7.1)	CDW43_RS00545	CDW43_RS00545	ABC transporter permease subunit	ABC transporter permease subunit			4490	3695	8665	9199	11573	6155	5344	6597	1413		5090.47	3236.28	4364.08	5645.59	4996.49	6649.54	4012.3	4871.32	4838.38
CDS	peg.120	Q7A_120	119974	120930	957	-	Phosphate ABC transporter, periplasmic phosphate-binding protein PstS (TC 3.A.1.7.1)	phosphate-binding protein; AFI82979.1	12430	4524	4530	4736	4026	7147	2678	3080	3072	CDS	peg.119	120000	120956	957	-	Phosphate ABC transporter, periplasmic phosphate-binding protein PstS (TC 3.A.1.7.1)	CDW43_RS00550	CDW43_RS00550	PstS family phosphate ABC transporter substrate-binding protein	PstS family phosphate ABC transporter substrate-binding protein			1704	1561	6016	3909	12468	3009	2973	3086	2618		12988.5	4727.27	4733.54	4948.8	4206.9	7468.13	2798.33	3218.39	3210.03
CDS	peg.121	Q7A_121	121072	122361	1290	-	Phosphate regulon sensor protein PhoR (SphS) (EC 2.7.13.3)	phosphate regulon sensor histidine kinase PhoR; AFI82980.1	10579	5445	8168	9711	9880	13299	7834	9378	10226	CDS	peg.120	121098	122387	1290	-	Phosphate regulon sensor protein PhoR (SphS) (EC 2.7.13.3)	CDW43_RS00555	CDW43_RS00555	phosphate regulon sensor histidine kinase PhoR	phosphate regulon sensor histidine kinase PhoR			4164	3348	7902	7305	9938	4982	3961	5090	1389		8200.78	4220.93	6331.78	7527.91	7658.91	10309.3	6072.87	7269.77	7927.13
CDS	peg.122	Q7A_122	122374	123066	693	-	Phosphate regulon transcriptional regulatory protein PhoB (SphR)	DNA-binding response regulator; AFI82981.1	5989	3123	4437	5605	5775	7642	4065	4286	4571	CDS	peg.121	122400	123092	693	-	Phosphate regulon transcriptional regulatory protein PhoB (SphR)	CDW43_RS00560	CDW43_RS00560	phosphate regulon transcriptional regulator PhoB	phosphate regulon transcriptional regulator PhoB			2095	1683	4430	4761	5979	2767	2447	3000	921		8642.14	4506.49	6402.6	8088.02	8333.33	11027.4	5865.8	6184.7	6595.96
CDS	peg.123	Q7A_123	123148	124371	1224	-	Permease of the major facilitator superfamily	MFS transporter; AFI82982.1	5846	2875	4836	4570	4110	6856	3008	2473	2416	CDS	peg.122	123174	124397	1224	-	Permease of the major facilitator superfamily	CDW43_RS00565	CDW43_RS00565	organoarsenical effux MFS transporter ArsJ	organoarsenical effux MFS transporter ArsJ			2543	1664	4239	2014	3542	1997	2689	2565	441		4776.14	2348.86	3950.98	3733.66	3357.84	5601.31	2457.52	2020.42	1973.86
CDS	peg.124	Q7A_124	124430	126079	1650	-	Probable low-affinity inorganic phosphate transporter	inorganic phosphate transporter; AFI82983.1	10786	5694	9014	9534	9088	13820	13455	11095	9981	CDS	peg.123	124456	126105	1650	-	Probable low-affinity inorganic phosphate transporter	CDW43_RS00570	CDW43_RS00570	inorganic phosphate transporter	inorganic phosphate transporter			7090	4817	7797	4207	6931	3909	9922	10567	1629		6536.97	3450.91	5463.03	5778.18	5507.88	8375.76	8154.55	6724.24	6049.09
CDS	peg.125	Q7A_125	126216	128054	1839	+	Cytochrome c-type biogenesis protein DsbD, protein-disulfide reductase (EC 1.8.1.8)	cytochrome C biogenesis protein; AFI82984.1	13377	8347	11243	16038	14475	19640	13978	15077	15190	CDS	peg.124	126242	128080	1839	+	Cytochrome c-type biogenesis protein DsbD, protein-disulfide reductase (EC 1.8.1.8)	CDW43_RS00575	CDW43_RS00575	protein-disulfide reductase DsbD	protein-disulfide reductase DsbD			5725	4527	10984	15339	18374	9129	6594	8676	1598		7274.06	4538.88	6113.65	8721.04	7871.13	10679.7	7600.87	8198.48	8259.92
CDS	peg.126	Q7A_126	128190	128627	438	+	3-dehydroquinate dehydratase II (EC 4.2.1.10)	type II 3-dehydroquinate dehydratase; AFI82985.1	7172	4005	6753	7024	4984	10009	3489	3591	3842	CDS	peg.125	128216	128653	438	+	3-dehydroquinate dehydratase II (EC 4.2.1.10)	CDW43_RS00580	CDW43_RS00580	type II 3-dehydroquinate dehydratase	type II 3-dehydroquinate dehydratase			2707	2088	6012	3948	6476	3852	3952	3352	665		16374.4	9143.84	15417.8	16036.5	11379	22851.6	7965.75	8198.63	8771.69
CDS	peg.127	Q7A_127	128637	129104	468	+	Biotin carboxyl carrier protein of acetyl-CoA carboxylase	acetyl-CoA carboxylase biotin carboxyl carrier protein subunit; AFI82986.1	10260	7732	10781	10691	8415	15972	7409	7071	6947	CDS	peg.126	128663	129130	468	+	Biotin carboxyl carrier protein of acetyl-CoA carboxylase	CDW43_RS00585	CDW43_RS00585	acetyl-CoA carboxylase biotin carboxyl carrier protein	acetyl-CoA carboxylase biotin carboxyl carrier protein			3586	3323	9326	5975	9653	5649	5305	4717	1122		21923.1	16521.4	23036.3	22844	17980.8	34128.2	15831.2	15109	14844
CDS	peg.128	Q7A_128	129159	130499	1341	+	Biotin carboxylase of acetyl-CoA carboxylase (EC 6.3.4.14)	acetyl-CoA carboxylase biotin carboxylase subunit; AFI82987.1	46977	31930	47348	53531	39604	70804	25423	21900	22743	CDS	peg.127	129185	130525	1341	+	Biotin carboxylase of acetyl-CoA carboxylase (EC 6.3.4.14)	CDW43_RS00590	CDW43_RS00590	acetyl-CoA carboxylase biotin carboxylase subunit	acetyl-CoA carboxylase biotin carboxylase subunit			17763	15460	34254	20887	37725	21892	18503	15895	2421		35031.3	23810.6	35308	39918.7	29533.2	52799.4	18958.2	16331.1	16959.7
CDS	peg.129	Q7A_129	130511	131380	870	+	Ribosomal protein L11 methyltransferase (EC 2.1.1.-)	50S ribosomal protein L11 methyltransferase; AFI82988.1	31054	19426	30307	31502	22414	40749	11691	10535	11219	CDS	peg.128	130537	131406	870	+	Ribosomal protein L11 methyltransferase (EC 2.1.1.-)	CDW43_RS00595	CDW43_RS00595	50S ribosomal protein L11 methyltransferase	50S ribosomal protein L11 methyltransferase			11357	9701	21562	10584	20437	12545	11355	7403	1013		35694.3	22328.7	34835.6	36209.2	25763.2	46837.9	13437.9	12109.2	12895.4
CDS	peg.130	Q7A_130	131373	132374	1002	+	tRNA dihydrouridine synthase B (EC 1.-.-.-)	tRNA dihydrouridine synthase DusB; AFI82989.1	29039	17748	27935	33434	25806	44370	11213	10120	11127	CDS	peg.129	131399	132400	1002	+	tRNA dihydrouridine synthase B (EC 1.-.-.-)	CDW43_RS00600	CDW43_RS00600	tRNA dihydrouridine synthase DusB	tRNA dihydrouridine synthase DusB			11858	9689	23337	17420	26351	14477	11518	9246	1399		28981	17712.6	27879.2	33367.3	25754.5	44281.4	11190.6	10099.8	11104.8
CDS	peg.131	Q7A_131	132371	132661	291	+	DNA-binding protein Fis	Fis family transcriptional regulator; AFI82990.1	9451	5943	9364	11982	10534	18085	6572	6410	6442	CDS	peg.130	132397	132687	291	+	DNA-binding protein Fis	CDW43_RS00605	CDW43_RS00605	DNA-binding transcriptional regulator Fis	DNA-binding transcriptional regulator Fis			3382	3109	8907	8373	11245	5708	7010	6668	1353		32477.7	20422.7	32178.7	41175.3	36199.3	62147.8	22584.2	22027.5	22137.5
CDS	peg.132	Q7A_132	132691	134256	1566	+	IMP cyclohydrolase (EC 3.5.4.10) / Phosphoribosylaminoimidazolecarboxamide formyltransferase (EC 2.1.2.3)	bifunctional phosphoribosylaminoimidazolecarboxamide formyltransferase/IMP cyclohydrolase; AFI82991.1	59111	33799	55933	53774	40836	72665	23285	22126	21310	CDS	peg.131	132717	134282	1566	+	IMP cyclohydrolase (EC 3.5.4.10) / Phosphoribosylaminoimidazolecarboxamide formyltransferase (EC 2.1.2.3)	CDW43_RS00610	CDW43_RS00610	bifunctional phosphoribosylaminoimidazolecarboxamide formyltransferase/IMP cyclohydrolase	bifunctional phosphoribosylaminoimidazolecarboxamide formyltransferase/IMP cyclohydrolase			17617	15398	43649	25326	41309	25130	20767	17663	2037		37746.5	21583	35717.1	34338.4	26076.6	46401.7	14869.1	14129	13607.9
CDS	peg.133	Q7A_133	134270	136903	2634	+	Adenylate cyclase (EC 4.6.1.1)	hypothetical protein; AFI82992.1	32412	21444	32807	34511	26560	50938	12810	12910	12496	CDS	peg.132	134296	136929	2634	+	Adenylate cyclase (EC 4.6.1.1)	CDW43_RS00615	CDW43_RS00615	class I adenylate cyclase	class I adenylate cyclase			10524	8969	28292	16996	26440	16197	14884	12296	1938		12305.2	8141.23	12455.2	13102.1	10083.5	19338.6	4863.33	4901.29	4744.12
CDS	peg.134	Q7A_134	136957	137985	1029	+	N-acetyl-gamma-glutamyl-phosphate reductase (EC 1.2.1.38)	N-acetyl-gamma-glutamyl-phosphate reductase; AFI82993.1	27491	17592	25545	27392	24158	37247	20255	23170	21022	CDS	peg.133	136983	138011	1029	+	N-acetyl-gamma-glutamyl-phosphate reductase (EC 1.2.1.38)	CDW43_RS00620	CDW43_RS00620	N-acetyl-gamma-glutamyl-phosphate reductase	N-acetyl-gamma-glutamyl-phosphate reductase			13182	10759	22092	26675	31691	15532	14284	17413	5067		26716.2	17096.2	24825.1	26620	23477.2	36197.3	19684.2	22517	20429.5
CDS	peg.135	#N/A	138048	138185	138	-	hypothetical protein	#N/A	2142	1426	2227	2026	1781	3307	2219	2491	2477	CDS	peg.134	138074	138211	138	-	hypothetical protein	#N/A	#N/A	#N/A	#N/A			722	775	2054	2245	2801	1427	2000	2249	496		15521.7	10333.3	16137.7	14681.2	12905.8	23963.8	16079.7	18050.7	17949.3
CDS	peg.136	#N/A	138165	138689	525	+	hypothetical protein	#N/A	4665	3024	4612	4109	3354	6983	3420	3762	4066	CDS	peg.135	138191	138715	525	+	hypothetical protein	#N/A	CDW43_RS00625	#N/A	hypothetical protein			1435	1424	4617	4348	5618	3003	3580	3658	673		8885.71	5760	8784.76	7826.67	6388.57	13301	6514.29	7165.71	7744.76
CDS	peg.137	Q7A_137	138698	139135	438	+	Integral membrane protein CcmA involved in cell shape determination	cell shape determination protein CcmA; AFI82996.1	6697	4737	7054	5467	4487	10159	4000	4119	4737	CDS	peg.136	138724	139161	438	+	Integral membrane protein CcmA involved in cell shape determination	CDW43_RS00630	CDW43_RS00630	polymer-forming cytoskeletal protein	polymer-forming cytoskeletal protein			2358	2071	7913	6774	9093	5009	3893	4082	823		15290	10815.1	16105	12481.7	10244.3	23194.1	9132.42	9404.11	10815.1
CDS	peg.138	Q7A_138	139286	139630	345	+	probable iron binding protein from the HesB_IscA_SufA family	iron-sulfur cluster insertion protein ErpA; AFI82997.1	24733	14140	20010	26184	29192	39581	28767	34243	36838	CDS	peg.137	139312	139656	345	+	probable iron binding protein from the HesB_IscA_SufA family	CDW43_RS00635	CDW43_RS00635	iron-sulfur cluster insertion protein ErpA	iron-sulfur cluster insertion protein ErpA			10650	9026	24814	79200	87038	41765	16721	36415	12591		71689.9	40985.5	58000	75895.7	84614.5	114728	83382.6	99255.1	106777
CDS	peg.139	Q7A_139	139759	141048	1290	+	hypothetical protein	hypothetical protein; AFI82998.1	7547	4581	6721	4696	4351	8911	3374	3384	3565	CDS	peg.138	139785	141074	1290	+	hypothetical protein	CDW43_RS00640	CDW43_RS00640	DUF2254 domain-containing protein	DUF2254 domain-containing protein			2934	2495	7888	7454	10232	5637	5699	5947	1190		5850.39	3551.16	5210.08	3640.31	3372.87	6907.75	2615.5	2623.26	2763.57
CDS	peg.140	Q7A_140	141127	141753	627	+	Transcriptional regulator, TetR family	TetR family transcriptional regulator; AFI82999.1	4664	2284	3229	3802	4075	10742	2683	2474	2955	CDS	peg.139	141153	141779	627	+	Transcriptional regulator, TetR family	CDW43_RS00645	CDW43_RS00645	TetR/AcrR family transcriptional regulator	TetR/AcrR family transcriptional regulator			1639	1304	2885	2146	3353	2166	3201	2927	1318		7438.6	3642.74	5149.92	6063.8	6499.2	17132.4	4279.11	3945.77	4712.92
CDS	peg.141	Q7A_141	141757	142929	1173	+	RND efflux system, membrane fusion protein CmeA	MexE family multidrug efflux RND transporter periplasmic adaptor subunit; AFI83000.1	5583	3031	3840	4501	4778	13234	3745	3542	4014	CDS	peg.140	141783	142955	1173	+	RND efflux system, membrane fusion protein CmeA	CDW43_RS00650	CDW43_RS00650	efflux RND transporter periplasmic adaptor subunit	efflux RND transporter periplasmic adaptor subunit			2238	1748	4103	2483	4380	2662	4766	3632	1222		4759.59	2583.97	3273.66	3837.17	4073.32	11282.2	3192.67	3019.61	3421.99
CDS	peg.142	Q7A_142	142932	146078	3147	+	RND efflux system, inner membrane transporter CmeB	multidrug efflux RND transporter permease subunit; AFI83001.1	27265	14493	20869	22405	24679	56762	14958	14098	14344	CDS	peg.141	142958	146104	3147	+	RND efflux system, inner membrane transporter CmeB	CDW43_RS00655	CDW43_RS00655	efflux RND transporter permease subunit	efflux RND transporter permease subunit			8696	7386	15705	8708	15816	9901	14283	9560	2606		8663.81	4605.34	6631.39	7119.48	7842.07	18036.9	4753.1	4479.82	4557.99
CDS	peg.143	Q7A_143	146075	147517	1443	+	RND efflux system, outer membrane lipoprotein CmeC	hypothetical protein; AFI83002.1	22801	13712	19658	17344	19573	50675	8005	6197	5904	CDS	peg.142	146101	147543	1443	+	RND efflux system, outer membrane lipoprotein CmeC	CDW43_RS00660	CDW43_RS00660	efflux transporter outer membrane subunit	efflux transporter outer membrane subunit			6497	5591	14470	6638	11807	7973	10017	5662	1560		15801.1	9502.43	13623	12019.4	13564.1	35117.8	5547.47	4294.53	4091.48
CDS	peg.144	Q7A_144	147597	147776	180	+	hypothetical protein	hypothetical protein; AFI83003.1	13018	8247	11571	6851	6947	15578	2206	1766	1640	CDS	peg.143	147623	147802	180	+	hypothetical protein	CDW43_RS00665	CDW43_RS00665	PLDc N-terminal domain-containing protein	PLDc N-terminal domain-containing protein			7216	4885	10173	6400	9519	5464	3266	2679	776		72322.2	45816.7	64283.3	38061.1	38594.4	86544.4	12255.6	9811.11	9111.11
CDS	peg.145	Q7A_145	147967	150027	2061	+	High-affinity choline uptake protein BetT	choline transporter; AFI83004.1	17969	11672	18097	12952	11593	26771	8449	8424	9925	CDS	peg.144	147993	150053	2061	+	High-affinity choline uptake protein BetT	CDW43_RS00670	CDW43_RS00670	BCCT family transporter	BCCT family transporter			6490	5435	14709	8400	13935	8787	9812	9009	2038		8718.58	5663.27	8780.69	6284.33	5624.94	12989.3	4099.47	4087.34	4815.62
CDS	peg.146	#N/A	150303	150461	159	+	hypothetical protein	#N/A	411	253	414	229	1767	1666	1029	1151	1039	CDS	peg.145	150329	150487	159	+	hypothetical protein	#N/A	#N/A	#N/A	#N/A			163	126	270	207	264	145	376	343	1886		2584.91	1591.19	2603.77	1440.25	11113.2	10478	6471.7	7238.99	6534.59
CDS	peg.147	Q7A_147	150512	151429	918	+	Transcriptional regulator, LysR family	LysR family transcriptional regulator; AFI83006.1	1647	749	1334	1046	1075	2044	1475	1423	1571	CDS	peg.146	150538	151455	918	+	Transcriptional regulator, LysR family	CDW43_RS00675	CDW43_RS00675	LysR family transcriptional regulator	LysR family transcriptional regulator			536	400	1122	869	1154	600	1185	1249	759		1794.12	815.904	1453.16	1139.43	1171.02	2226.58	1606.75	1550.11	1711.33
CDS	peg.148	Q7A_148	151516	152922	1407	+	diguanylate cyclase/phosphodiesterase (GGDEF & EAL domains) with PAS/PAC sensor(s)	GGDEF domain-containing protein; AFI83007.1	14450	11234	14863	12645	15883	23107	9618	10716	12090	CDS	peg.147	151542	152948	1407	+	diguanylate cyclase/phosphodiesterase (GGDEF & EAL domains) with PAS/PAC sensor(s)	CDW43_RS00680	CDW43_RS00680	diguanylate cyclase	diguanylate cyclase			5637	4675	6174	7262	8648	4331	7824	9573	2352		10270.1	7984.36	10563.6	8987.21	11288.6	16422.9	6835.82	7616.2	8592.75
CDS	peg.149	Q7A_149	152876	153430	555	-	Lactoylglutathione lyase (EC 4.4.1.5)	lactoylglutathione lyase; AFI83008.1	11789	8648	11177	12309	10755	19326	6523	5954	6238	CDS	peg.148	152902	153456	555	-	Lactoylglutathione lyase (EC 4.4.1.5)	CDW43_RS00685	CDW43_RS00685	lactoylglutathione lyase	lactoylglutathione lyase			2359	2222	5688	6456	7889	4127	3297	3833	877		21241.4	15582	20138.7	22178.4	19378.4	34821.6	11753.2	10727.9	11239.6
CDS	peg.150	Q7A_150	153457	154410	954	-	Magnesium and cobalt transport protein CorA	magnesium and cobalt transport protein CorA; AFI83009.1	16394	9104	13779	12673	11653	21906	9521	8499	8630	CDS	peg.149	153483	154436	954	-	Magnesium and cobalt transport protein CorA	CDW43_RS00690	CDW43_RS00690	magnesium/cobalt transporter CorA	magnesium/cobalt transporter CorA			2529	2176	6383	6019	7909	3488	3889	4438	1086		17184.5	9542.98	14443.4	13284.1	12214.9	22962.3	9980.08	8908.81	9046.12
CDS	peg.151	Q7A_151	154791	155414	624	-	HEN1 C-terminal domain double-stranded RNA 3'-methylase	methyltransferase type 12; AFI83010.1	4914	2691	4457	1778	1679	4243	1200	887	913	CDS	peg.150	154817	155440	624	-	HEN1 C-terminal domain double-stranded RNA 3'-methylase	CDW43_RS00695	CDW43_RS00695	class I SAM-dependent methyltransferase	class I SAM-dependent methyltransferase			1450	1260	2758	814	1261	1051	2579	1659	342		7875	4312.5	7142.63	2849.36	2690.71	6799.68	1923.08	1421.47	1463.14
CDS	peg.152	Q7A_152	155433	156791	1359	-	GTPase and tRNA-U34 5-formylation enzyme TrmE	tRNA uridine-5-carboxymethylaminomethyl(34) synthesis GTPase MnmE; AFI83011.1	25770	13106	22741	9844	9282	21191	6256	3323	3943	CDS	peg.151	155459	156817	1359	-	GTPase and tRNA-U34 5-formylation enzyme TrmE	CDW43_RS00700	CDW43_RS00700	tRNA uridine-5-carboxymethylaminomethyl(34) synthesis GTPase MnmE	tRNA uridine-5-carboxymethylaminomethyl(34) synthesis GTPase MnmE			8357	6854	14017	2726	5952	4711	8011	4586	1065		18962.5	9643.86	16733.6	7243.56	6830.02	15593.1	4603.38	2445.18	2901.4
CDS	peg.153	Q7A_153	156849	158492	1644	-	Inner membrane protein translocase component YidC, long form	membrane protein insertase YidC; AFI83012.1	45664	24771	43167	20582	17382	42560	13816	8000	10511	CDS	peg.152	156875	158518	1644	-	Inner membrane protein translocase component YidC, long form	CDW43_RS00705	CDW43_RS00705	membrane protein insertase YidC	membrane protein insertase YidC			15897	13323	30453	7046	14001	10588	28285	17274	3396		27776.2	15067.5	26257.3	12519.5	10573	25888.1	8403.89	4866.18	6393.55
CDS	peg.154	Q7A_154	158706	159038	333	-	Ribonuclease P protein component (EC 3.1.26.5)	ribonuclease P protein component; AFI83013.1	42102	21835	38231	21116	18924	40563	17420	11696	12950	CDS	peg.153	158732	159064	333	-	Ribonuclease P protein component (EC 3.1.26.5)	CDW43_RS00715	#N/A	ribonuclease P protein component	#N/A			16912	13347	25305	6761	14452	10015	31869	24929	4066		126432	65570.6	114808	63411.4	56828.8	121811	52312.3	35123.1	38888.9
CDS	peg.155	Q7A_155	159088	159222	135	-	LSU ribosomal protein L34p	50S ribosomal protein L34; AFI83014.1	40825	17624	29921	13122	12932	30672	10895	8897	9844	CDS	peg.154	159114	159248	135	-	LSU ribosomal protein L34p	CDW43_RS00720	CDW43_RS00720	50S ribosomal protein L34	50S ribosomal protein L34			14229	11347	23804	6644	13247	8416	24998	18169	3201		302407	130548	221637	97200	95792.6	227200	80703.7	65903.7	72918.5
CDS	peg.156	Q7A_156	159488	160852	1365	+	Chromosomal replication initiator protein DnaA	chromosomal replication initiation protein DnaA; AFI83015.1	20046	12069	20248	13604	12143	27899	10715	9582	10945	CDS	peg.155	159514	160878	1365	+	Chromosomal replication initiator protein DnaA	CDW43_RS00725	CDW43_RS00725	chromosomal replication initiator protein DnaA	chromosomal replication initiator protein DnaA			5668	5242	17611	7543	12105	7312	15540	13967	2068		14685.7	8841.76	14833.7	9966.3	8895.97	20438.8	7849.82	7019.78	8018.32
CDS	peg.157	Q7A_157	160867	161970	1104	+	DNA polymerase III beta subunit (EC 2.7.7.7)	DNA polymerase III subunit beta; AFI83016.1	21493	14701	21409	17184	14412	30073	7500	7087	7619	CDS	peg.156	160893	161996	1104	+	DNA polymerase III beta subunit (EC 2.7.7.7)	CDW43_RS00730	CDW43_RS00730	DNA polymerase III subunit beta	DNA polymerase III subunit beta			6865	6380	17819	8619	13124	8319	10604	8194	1866		19468.3	13316.1	19392.2	15565.2	13054.3	27240	6793.48	6419.38	6901.27
CDS	peg.158	Q7A_158	162036	163238	1203	-	Uncharacterized protein EC-HemY, likely associated with heme metabolism based on gene clustering with hemC, hemD in Proteobacteria (unrelated to HemY-type PPO in GramPositives)	heme biosynthesis protein HemY; AFI83017.1	16312	9125	15004	19919	15864	26068	24432	27358	28489	CDS	peg.157	162062	163264	1203	-	Uncharacterized protein EC-HemY, likely associated with heme metabolism based on gene clustering with hemC, hemD in Proteobacteria (unrelated to HemY-type PPO in GramPositives)	CDW43_RS00735	CDW43_RS00735	hypothetical protein	hypothetical protein			5872	4720	12694	10619	15799	8338	11668	11985	1309		13559.4	7585.2	12472.2	16557.8	13187	21669.2	20309.2	22741.5	23681.6
CDS	peg.159	Q7A_159	163235	164269	1035	-	Homolog of E. coli HemX protein	hypothetical protein; AFI83018.1	19163	10116	15937	26807	21559	29128	43616	49906	52815	CDS	peg.158	163261	164295	1035	-	Homolog of E. coli HemX protein	CDW43_RS00740	CDW43_RS00740	uroporphyrinogen-III C-methyltransferase	uroporphyrinogen-III C-methyltransferase			8151	6559	15923	14999	21680	10899	15283	17018	2823		18515	9773.91	15398.1	25900.5	20830	28143	42141.1	48218.4	51029
CDS	peg.160	Q7A_160	164259	165023	765	-	Uroporphyrinogen-III synthase (EC 4.2.1.75)	uroporphyrinogen-III synthase; AFI83019.2	14600	8701	13259	21359	17266	24514	18033	19559	21767	CDS	peg.159	164285	165049	765	-	Uroporphyrinogen-III synthase (EC 4.2.1.75)	CDW43_RS00745	#N/A	uroporphyrinogen-III synthase	#N/A			6406	5149	11733	13699	17561	8383	6817	7962	1369		19085	11373.9	17332	27920.3	22569.9	32044.4	23572.5	25567.3	28453.6
CDS	peg.161	Q7A_161	165016	165945	930	-	Porphobilinogen deaminase (EC 2.5.1.61)	hydroxymethylbilane synthase; AFI83020.1	19678	12345	18037	29803	24059	31290	18989	18366	18599	CDS	peg.160	165042	165971	930	-	Porphobilinogen deaminase (EC 2.5.1.61)	CDW43_RS00750	CDW43_RS00750	hydroxymethylbilane synthase	hydroxymethylbilane synthase			9461	7597	14787	21887	24977	11830	5367	7268	1984		21159.1	13274.2	19394.6	32046.2	25869.9	33645.2	20418.3	19748.4	19998.9
CDS	peg.162	Q7A_162	166065	167447	1383	+	Argininosuccinate lyase (EC 4.3.2.1)	argininosuccinate lyase; AFI83021.1	15508	10743	15521	19403	14642	22841	12443	12343	11082	CDS	peg.162	166090	167473	1384	+	Argininosuccinate lyase (EC 4.3.2.1)	#N/A	CDW43_RS00755	#N/A	argininosuccinate lyase			5853	5341	11036	9784	12982	7159	10590	9730	1713		11213.3	7767.9	11222.7	14029.6	10587.1	16515.5	8997.11	8924.8	8013.02
CDS	peg.163	Q7A_163	167539	168903	1365	+	membrane protein, putative	hypothetical protein; AFI83022.1	3680	2418	3776	3560	2512	5456	2019	1718	1874	CDS	peg.163	167565	168929	1365	+	membrane protein, putative	CDW43_RS00760	CDW43_RS00760	DUF2914 domain-containing protein	DUF2914 domain-containing protein			1213	1111	3433	1507	2606	1699	2561	2008	278		2695.97	1771.43	2766.3	2608.06	1840.29	3997.07	1479.12	1258.61	1372.89
CDS	peg.164	Q7A_164	168900	169115	216	-	hypothetical protein	hypothetical protein; AFI83023.1	812	559	750	490	495	1167	327	231	255	CDS	peg.164	168926	169141	216	-	hypothetical protein	CDW43_RS00765	CDW43_RS00765	hypothetical protein	hypothetical protein			263	278	967	426	764	528	489	425	84		3759.26	2587.96	3472.22	2268.52	2291.67	5402.78	1513.89	1069.44	1180.56
CDS	peg.165	Q7A_165	169142	169492	351	-	FIG016502: iron uptake protein	DUF3325 domain-containing protein; AFI83024.1	1161	676	997	774	832	1371	293	191	239	CDS	peg.165	169168	169518	351	-	FIG016502: iron uptake protein	CDW43_RS00770	CDW43_RS00770	DUF3325 domain-containing protein	DUF3325 domain-containing protein			464	375	871	432	708	494	270	295	63		3307.69	1925.93	2840.46	2205.13	2370.37	3905.98	834.758	544.16	680.912
CDS	peg.166	Q7A_166	169492	171135	1644	-	FIG138928: iron-regulated membrane protein	PepSY domain-containing protein; AFI83025.1	5454	3307	5023	3774	5299	7054	3025	3081	3587	CDS	peg.166	169518	171161	1644	-	FIG138928: iron-regulated membrane protein	CDW43_RS00775	CDW43_RS00775	PepSY domain-containing protein	PepSY domain-containing protein			2273	1689	3236	1795	2870	1903	2351	2679	2256		3317.52	2011.56	3055.35	2295.62	3223.24	4290.75	1840.02	1874.09	2181.87
CDS	peg.167	Q7A_167	171132	171413	282	-	FIG024006: iron uptake protein	hypothetical protein; AFI83026.1	2453	1631	2521	1913	2770	3424	1775	1987	2086	CDS	peg.167	171158	171439	282	-	FIG024006: iron uptake protein	CDW43_RS00780	CDW43_RS00780	DUF3649 domain-containing protein	DUF3649 domain-containing protein			755	555	1292	936	1404	825	987	1091	2060		8698.58	5783.69	8939.72	6783.69	9822.7	12141.8	6294.33	7046.1	7397.16
CDS	peg.168	Q7A_168	171949	174321	2373	-	TonB-dependent siderophore receptor	TonB-dependent siderophore receptor; AFI83027.1	3546	2149	3243	2742	2486	4508	1188	1123	1308	CDS	peg.168	171975	174056	2082	-	TonB-dependent siderophore receptor	CDW43_RS00785	CDW43_RS00785	TonB-dependent siderophore receptor	TonB-dependent siderophore receptor			2063	1670	3823	2526	3965	2165	2077	2740	1677		1494.31	905.605	1366.62	1155.5	1047.62	1899.71	500.632	473.241	551.201
CDS	peg.193	Q7A_192	200698	201198	501	-	FIG006045: Sigma factor, ECF subfamily	RNA polymerase subunit sigma; AFI83051.1	2142	1461	2206	2750	3275	3801	2137	3030	3950	CDS	peg.169	174064	174306	243	-	FIG006045: Sigma factor, ECF subfamily	CDW43_RS00790	CDW43_RS00790	hypothetical protein	hypothetical protein			741	605	1204	975	1248	755	864	1020	1367		4275.45	2916.17	4403.19	5489.02	6536.93	7586.83	4265.47	6047.9	7884.23
CDS	peg.194	Q7A_193	201490	203034	1545	+	Filamentation induced by cAMP protein Fic	cell filamentation protein Fic; AFI83052.1	9272	6702	9750	11663	8208	13838	8484	10246	11540	CDS	peg.171	175608	177152	1545	+	Filamentation induced by cAMP protein Fic	CDW43_RS00800	CDW43_RS00800	Fic family protein	Fic family protein			2152	1739	4741	3572	5496	3495	2597	4532	1299		6001.29	4337.86	6310.68	7548.87	5312.62	8956.63	5491.26	6631.72	7469.26
CDS	peg.195	#N/A	202994	203146	153	-	hypothetical protein	#N/A	1661	1179	1778	1807	1250	2234	1470	2041	2041	CDS	peg.172	177112	177264	153	-	hypothetical protein	#N/A	#N/A	#N/A	#N/A			301	302	807	511	803	467	530	699	148		10856.2	7705.88	11620.9	11810.5	8169.93	14601.3	9607.84	13339.9	13339.9
CDS	peg.196	Q7A_195	203109	203282	174	+	hypothetical protein	addiction module antidote protein%2C HigA family; AFI83054.2	1863	1212	1879	1561	1188	2345	1409	1945	2104	CDS	peg.173	177218	177400	183	+	hypothetical protein	CDW43_RS00805	CDW43_RS00805	HigA family addiction module antitoxin	HigA family addiction module antitoxin			317	290	764	491	739	444	535	712	159		10706.9	6965.52	10798.9	8971.26	6827.59	13477	8097.7	11178.2	12092
CDS	peg.197	Q7A_196	203518	205866	2349	-	Ferrichrome-iron receptor	TonB-dependent siderophore receptor; AFI83055.1	10023	6433	9625	8528	7652	14184	8570	8850	10837	CDS	peg.174	177621	179969	2349	-	Ferrichrome-iron receptor	CDW43_RS00810	CDW43_RS00810	TonB-dependent siderophore receptor	TonB-dependent siderophore receptor			3583	3135	10113	8032	10251	5684	8606	9715	1884		4266.92	2738.61	4097.49	3630.48	3257.56	6038.31	3648.36	3767.56	4613.45
CDS	peg.198	Q7A_197	206083	207081	999	-	putative transmembrane sensor	iron dicitrate transport regulator FecR; AFI83056.1	526	314	531	390	466	801	461	473	710	CDS	peg.175	180186	181184	999	-	putative transmembrane sensor	CDW43_RS00815	CDW43_RS00815	FecR domain-containing protein	FecR domain-containing protein			490	376	731	549	846	492	548	725	672		526.527	314.314	531.532	390.39	466.466	801.802	461.461	473.473	710.711
CDS	peg.199	Q7A_03140	207078	207587	510	-	FIG006045: Sigma factor, ECF subfamily	RNA polymerase subunit sigma;pseudo=true	1251	676	1173	843	1102	1701	849	1009	1161	CDS	peg.176	181181	181690	510	-	FIG006045: Sigma factor, ECF subfamily	CDW43_RS00820	CDW43_RS00820	sigma-70 family RNA polymerase sigma factor	sigma-70 family RNA polymerase sigma factor			586	524	809	733	982	600	644	856	1705		2452.94	1325.49	2300	1652.94	2160.78	3335.29	1664.71	1978.43	2276.47
CDS	peg.201	Q7A_200	207795	210221	2427	-	Ferrichrome-iron receptor	TonB-dependent siderophore receptor; AFI83059.1	7201	4406	7026	4938	4930	9132	3769	3679	4445	CDS	peg.177	181898	184324	2427	-	Ferrichrome-iron receptor	CDW43_RS16475	CDW43_RS16480	TonB-dependent siderophore receptor	TonB-dependent siderophore receptor			2446	1987	6014	4364	6053	3486	3903	4640	1015		2967.04	1815.41	2894.93	2034.61	2031.31	3762.67	1552.95	1515.86	1831.48
CDS	peg.202	Q7A_201	210297	211250	954	-	Fe2+-dicitrate sensor, membrane component	hypothetical protein; AFI83060.2	2833	1846	2778	2034	2050	3971	1059	1261	1374	CDS	peg.179	184400	185353	954	-	Fe2+-dicitrate sensor, membrane component	CDW43_RS00830	CDW43_RS00830	FecR domain-containing protein	FecR domain-containing protein			765	687	1784	1061	1552	975	962	1179	580		2969.6	1935.01	2911.95	2132.08	2148.85	4162.47	1110.06	1321.8	1440.25
CDS	peg.203	Q7A_202	211256	211753	498	-	RNA polymerase sigma-70 factor, ECF subfamily	RNA polymerase subunit sigma; AFI83061.1	2293	1602	2406	1684	1826	3373	980	955	1028	CDS	peg.180	185359	185856	498	-	RNA polymerase sigma-70 factor, ECF subfamily	CDW43_RS00835	CDW43_RS00835	sigma-70 family RNA polymerase sigma factor	sigma-70 family RNA polymerase sigma factor			893	803	1614	1380	1679	897	792	1004	741		4604.42	3216.87	4831.33	3381.53	3666.67	6773.09	1967.87	1917.67	2064.26
CDS	peg.204	Q7A_203	211906	214353	2448	-	TonB-dependent siderophore receptor	TonB-dependent siderophore receptor; AFI83062.1	12168	6998	11609	7480	7819	12963	4958	4967	5681	CDS	peg.181	186009	188456	2448	-	TonB-dependent siderophore receptor	CDW43_RS00840	CDW43_RS00840	TonB-dependent receptor	TonB-dependent receptor			3932	3160	7795	3772	6057	3911	3473	4104	1040		4970.59	2858.66	4742.24	3055.56	3194.04	5295.34	2025.33	2029	2320.67
CDS	peg.205	Q7A_204	214688	215629	942	-	Fe2+-dicitrate sensor, membrane component	iron dicitrate transport regulator FecR; AFI83063.1	6952	4828	6657	6725	6528	11241	3698	3928	4325	CDS	peg.182	188791	189732	942	-	Fe2+-dicitrate sensor, membrane component	CDW43_RS00845	CDW43_RS00845	FecR domain-containing protein	FecR domain-containing protein			2729	2203	5240	4017	5848	3111	3235	3824	2144		7380.04	5125.27	7066.88	7139.07	6929.94	11933.1	3925.69	4169.85	4591.3
CDS	peg.206	Q7A_205	215643	216011	369	-	probable sigma-70 factor, ECF subfamily	RNA polymerase subunit sigma; AFI83064.2	1902	1344	1726	1677	1966	3328	1998	2306	2308	CDS	peg.183	189746	190114	369	-	probable sigma-70 factor, ECF subfamily	CDW43_RS00850	#N/A	sigma-70 family RNA polymerase sigma factor	#N/A			576	573	1837	1670	2229	1142	1478	1805	1549		5154.47	3642.28	4677.51	4544.72	5327.91	9018.97	5414.63	6249.32	6254.74
CDS	peg.207	Q7A_206	216624	217079	456	-	hypothetical protein	TerB family tellurite resistance protein; AFI83065.1	2747	2054	2805	2419	2274	4065	1092	1211	1485	CDS	peg.184	190727	191182	456	-	hypothetical protein	CDW43_RS00855	CDW43_RS00855	TerB family tellurite resistance protein	TerB family tellurite resistance protein			828	817	3366	4342	4982	2200	1085	1351	476		6024.12	4504.39	6151.32	5304.82	4986.84	8914.47	2394.74	2655.7	3256.58
CDS	peg.208	Q7A_207	217132	218262	1131	-	GNAT family acetyltransferase VC2332	ribosomal-protein-alanine acetyltransferase; AFI83066.1	9472	6486	9009	7891	7250	13301	1704	1900	1918	CDS	peg.185	191235	192365	1131	-	GNAT family acetyltransferase VC2332	CDW43_RS00860	CDW43_RS00860	GNAT family N-acetyltransferase/peptidase C39 family protein	GNAT family N-acetyltransferase/peptidase C39 family protein			3134	2737	8521	5748	7948	4752	1755	2078	598		8374.89	5734.75	7965.52	6977.01	6410.26	11760.4	1506.63	1679.93	1695.84
CDS	peg.209	Q7A_208	218246	219316	1071	-	hypothetical protein	deacylase; AFI83067.1	5990	4839	6349	6157	6670	11393	2829	2443	2510	CDS	peg.186	192349	193419	1071	-	hypothetical protein	CDW43_RS00865	CDW43_RS00865	DUF2817 domain-containing protein	DUF2817 domain-containing protein			2565	2236	6067	5282	6684	3224	2266	3081	881		5592.9	4518.21	5928.1	5748.83	6227.82	10637.7	2641.46	2281.05	2343.6
CDS	peg.210	#N/A	219336	219452	117	+	hypothetical protein	#N/A	525	451	593	564	649	1063	512	424	446	CDS	peg.187	193439	193555	117	+	hypothetical protein	#N/A	#N/A	#N/A	#N/A			293	210	643	744	814	389	317	475	148		4487.18	3854.7	5068.38	4820.51	5547.01	9085.47	4376.07	3623.93	3811.97
CDS	peg.211	Q7A_210	219484	220968	1485	+	ribosomal protein S6 glutaminyl transferase related protein	RimK family alpha-L-glutamate ligase; AFI83069.1	6642	4924	7165	4922	4417	8746	2983	2570	2624	CDS	peg.188	193587	195071	1485	+	ribosomal protein S6 glutaminyl transferase related protein	CDW43_RS00870	CDW43_RS00870	RimK family alpha-L-glutamate ligase	RimK family alpha-L-glutamate ligase			2259	1991	6698	4649	5789	3466	4717	4267	713		4472.73	3315.82	4824.92	3314.48	2974.41	5889.56	2008.75	1730.64	1767
CDS	peg.212	Q7A_211	221046	223103	2058	-	TonB-dependent receptor	TonB-dependent receptor; AFI83070.1	63898	59729	68190	28020	34603	82464	11253	7489	7932	CDS	peg.189	195149	197206	2058	-	TonB-dependent receptor	CDW43_RS00875	CDW43_RS00875	TonB-dependent receptor	TonB-dependent receptor			16198	14176	40623	26630	42792	26145	22863	15903	4330		31048.6	29022.8	33134.1	13615.2	16813.9	40070	5467.93	3638.97	3854.23
CDS	peg.213	Q7A_212	223256	224149	894	+	DnaJ-class molecular chaperone CbpA	cytochrome C biogenesis protein; AFI83071.1	12038	8759	10878	9749	13575	19991	11374	11596	17546	CDS	peg.190	197359	198252	894	+	DnaJ-class molecular chaperone CbpA	CDW43_RS00880	CDW43_RS00880	DnaJ domain-containing protein	DnaJ domain-containing protein			7496	5274	10491	5976	8541	4825	5723	11688	4041		13465.3	9797.54	12167.8	10904.9	15184.6	22361.3	12722.6	12970.9	19626.4
CDS	peg.214	Q7A_213	224171	225556	1386	+	HtrA protease/chaperone protein / Serine protease (Protease DO) (EC 3.4.21.-)	serine endoprotease DegQ; AFI83072.1	13622	10325	13301	12557	14373	22391	13556	14870	22572	CDS	peg.191	198274	199659	1386	+	HtrA protease/chaperone protein / Serine protease (Protease DO) (EC 3.4.21.-)	CDW43_RS00885	CDW43_RS00885	DegQ family serine endoprotease	DegQ family serine endoprotease			7544	5824	12245	8029	11278	6605	6213	12540	3059		9828.28	7449.49	9596.68	9059.88	10370.1	16155.1	9780.66	10728.7	16285.7
CDS	peg.215	Q7A_214	225668	226144	477	-	COGs COG3558	hypothetical protein; AFI83073.1	3248	2183	3387	2787	3120	5634	5327	5890	7483	CDS	peg.192	199771	200247	477	-	COGs COG3558	CDW43_RS00890	CDW43_RS00890	nuclear transport factor 2 family protein	nuclear transport factor 2 family protein			1116	951	2929	2550	3521	1845	2532	3917	4538		6809.22	4576.52	7100.63	5842.77	6540.88	11811.3	11167.7	12348	15687.6
CDS	peg.216	Q7A_215	226246	226821	576	+	Transcriptional regulator, TetR family	TetR family transcriptional regulator; AFI83074.1	1389	883	1333	1143	1196	2359	1381	1244	1630	CDS	peg.193	200349	200924	576	+	Transcriptional regulator, TetR family	CDW43_RS00895	CDW43_RS00895	TetR/AcrR family transcriptional regulator	TetR/AcrR family transcriptional regulator			577	438	1380	1170	1479	787	1772	2152	610		2411.46	1532.99	2314.24	1984.38	2076.39	4095.49	2397.57	2159.72	2829.86
CDS	peg.217	#N/A	227303	227455	153	+	hypothetical protein	#N/A	1621	949	1616	1387	1393	2171	2503	2751	3093	CDS	peg.194	201406	201558	153	+	hypothetical protein	#N/A	#N/A	#N/A	#N/A			443	395	1902	2228	2206	1186	1820	1906	613		10594.8	6202.61	10562.1	9065.36	9104.58	14189.5	16359.5	17980.4	20215.7
CDS	peg.218	Q7A_217	227624	228103	480	+	Bacterioferritin	bacterioferritin; AFI83076.1	10957	5932	9019	4763	4832	9566	6836	6957	7779	CDS	peg.195	201727	202206	480	+	Bacterioferritin	CDW43_RS00905	CDW43_RS00905	bacterioferritin	bacterioferritin			5489	3996	10541	7091	9800	5126	8918	9358	3548		22827.1	12358.3	18789.6	9922.92	10066.7	19929.2	14241.7	14493.8	16206.2
CDS	peg.219	Q7A_218	228811	229725	915	-	hypothetical protein	hypothetical protein; AFI83077.1	7017	5070	7698	5512	6186	10879	8469	9569	10831	CDS	peg.196	202914	203828	915	-	hypothetical protein	CDW43_RS00910	CDW43_RS00910	type II toxin-antitoxin system PemK/MazF family toxin	type II toxin-antitoxin system PemK/MazF family toxin			2527	2243	9147	8784	9920	5406	9948	9437	2165		7668.85	5540.98	8413.11	6024.04	6760.66	11889.6	9255.74	10457.9	11837.2
CDS	peg.220	Q7A_219	229759	231126	1368	-	N-acetylglucosamine-1-phosphate uridyltransferase (EC 2.7.7.23) / Glucosamine-1-phosphate N-acetyltransferase (EC 2.3.1.157)	UDP-N-acetylglucosamine diphosphorylase/glucosamine-1-phosphate N-acetyltransferase; AFI83078.1	9306	6311	10098	5644	5200	10866	4921	4276	4076	CDS	peg.197	203862	205229	1368	-	N-acetylglucosamine-1-phosphate uridyltransferase (EC 2.7.7.23) / Glucosamine-1-phosphate N-acetyltransferase (EC 2.3.1.157)	CDW43_RS00915	CDW43_RS00915	bifunctional UDP-N-acetylglucosamine diphosphorylase/glucosamine-1-phosphate N-acetyltransferase GlmU	bifunctional UDP-N-acetylglucosamine diphosphorylase/glucosamine-1-phosphate N-acetyltransferase GlmU			3391	3018	8715	5739	7632	4285	8639	6028	1392		6802.63	4613.3	7381.58	4125.73	3801.17	7942.98	3597.22	3125.73	2979.53
CDS	peg.221	Q7A_220	231222	231644	423	-	ATP synthase epsilon chain (EC 3.6.3.14)	F0F1 ATP synthase subunit epsilon; AFI83079.1	33677	19508	28746	36141	32484	54650	29218	15844	13455	CDS	peg.198	205325	205747	423	-	ATP synthase epsilon chain (EC 3.6.3.14)	CDW43_RS00920	CDW43_RS00920	F0F1 ATP synthase subunit epsilon	F0F1 ATP synthase subunit epsilon			11974	11336	25356	8486	17504	10472	39582	23995	3887		79614.7	46118.2	67957.4	85439.7	76794.3	129196	69073.3	37456.3	31808.5
CDS	peg.222	Q7A_221	231663	233039	1377	-	ATP synthase beta chain (EC 3.6.3.14)	ATP synthase subunit beta; AFI83080.1	209582	133454	201953	215158	173019	307410	84275	46879	35939	CDS	peg.199	205766	207142	1377	-	ATP synthase beta chain (EC 3.6.3.14)	CDW43_RS00925	CDW43_RS00925	F0F1 ATP synthase subunit beta	F0F1 ATP synthase subunit beta			69907	67185	155057	48970	100910	66648	110302	63724	12411		152202	96916.5	146662	156251	125649	223246	61201.9	34044.3	26099.5
CDS	peg.223	Q7A_222	233090	233887	798	-	ATP synthase gamma chain (EC 3.6.3.14)	F0F1 ATP synthase subunit gamma; AFI83081.2	100656	63198	97978	94389	78508	147357	27382	13011	10137	CDS	peg.200	207193	207990	798	-	ATP synthase gamma chain (EC 3.6.3.14)	CDW43_RS00930	#N/A	F0F1 ATP synthase subunit gamma	#N/A			32105	30861	71864	20034	42654	29370	41305	23395	3787		126135	79195.5	122779	118282	98381	184658	34313.3	16304.5	12703
CDS	peg.224	Q7A_223	233971	235512	1542	-	ATP synthase alpha chain (EC 3.6.3.14)	ATP synthase subunit alpha; AFI83082.1	204980	132709	199363	195454	158736	310461	67479	34580	26370	CDS	peg.201	208074	209615	1542	-	ATP synthase alpha chain (EC 3.6.3.14)	CDW43_RS00935	CDW43_RS00935	F0F1 ATP synthase subunit alpha	F0F1 ATP synthase subunit alpha			72055	66788	154286	46552	96628	65792	95755	56801	12793		132931	86062.9	129289	126754	102942	201337	43760.7	22425.4	17101.2
CDS	peg.225	Q7A_224	235537	236067	531	-	ATP synthase delta chain (EC 3.6.3.14)	F0F1 ATP synthase subunit delta; AFI83083.1	66482	45079	66474	70967	58523	113316	27381	15041	11462	CDS	peg.202	209640	210170	531	-	ATP synthase delta chain (EC 3.6.3.14)	CDW43_RS00940	CDW43_RS00940	F0F1 ATP synthase subunit delta	F0F1 ATP synthase subunit delta			25711	24309	49831	15607	32415	21137	39756	23517	4682		125202	84894.5	125186	133648	110213	213401	51565	28325.8	21585.7
CDS	peg.226	Q7A_225	236080	236550	471	-	ATP synthase F0 sector subunit b	F0F1 ATP synthase subunit B; AFI83084.1	106128	75585	110193	112757	90001	161492	34955	20992	16768	CDS	peg.203	210183	210653	471	-	ATP synthase F0 sector subunit b	CDW43_RS00945	CDW43_RS00945	F0F1 ATP synthase subunit B	F0F1 ATP synthase subunit B			39210	39049	76372	24508	51930	35825	45829	27564	5622		225325	160478	233955	239399	191085	342870	74214.4	44569	35600.8
CDS	peg.227	Q7A_226	236596	236829	234	-	ATP synthase F0 sector subunit c	F0F1 ATP synthase subunit C; AFI83085.1	41924	27261	37506	35427	34018	62412	9863	4986	4044	CDS	peg.204	210699	210932	234	-	ATP synthase F0 sector subunit c	CDW43_RS00950	#N/A	F0F1 ATP synthase subunit C	#N/A			16579	15845	31262	9619	19981	12957	16451	8912	1775		179162	116500	160282	151397	145376	266718	42149.6	21307.7	17282.1
CDS	peg.228	Q7A_227	236887	237786	900	-	ATP synthase F0 sector subunit a	F0F1 ATP synthase subunit A; AFI83086.1	52208	28531	47167	44951	37052	69246	33737	21182	19135	CDS	peg.205	210990	211889	900	-	ATP synthase F0 sector subunit a	CDW43_RS00955	CDW43_RS00955	F0F1 ATP synthase subunit A	F0F1 ATP synthase subunit A			20644	16805	35146	12739	24415	16482	57155	39913	6773		58008.9	31701.1	52407.8	49945.6	41168.9	76940	37485.6	23535.6	21261.1
CDS	peg.229	Q7A_03150	237794	238168	375	-	hypothetical protein	ATP synthase subunit I; ASF49051.1	34552	18237	29874	30510	27852	45955	23791	17230	17557	CDS	peg.206	211897	212139	243	-	hypothetical protein	CDW43_RS00960	#N/A	ATP synthase subunit I	#N/A			10720	9336	17667	7863	14201	8612	31748	26387	3852		92138.7	48632	79664	81360	74272	122547	63442.7	45946.7	46818.7
CDS	peg.230	Q7A_229	238456	239319	864	-	Chromosome (plasmid) partitioning protein ParB	chromosome partitioning protein ParB; AFI83088.1	18829	11386	17835	16091	12880	26096	13075	10600	9253	CDS	peg.207	212559	213422	864	-	Chromosome (plasmid) partitioning protein ParB	CDW43_RS00965	CDW43_RS00965	ParB/RepB/Spo0J family partition protein	ParB/RepB/Spo0J family partition protein			5600	5197	16628	8524	14370	8259	13348	10640	2247		21792.8	13178.2	20642.4	18623.8	14907.4	30203.7	15133.1	12268.5	10709.5
CDS	peg.231	Q7A_230	239336	240118	783	-	Chromosome (plasmid) partitioning protein ParA	ParA family protein; AFI83089.1	26326	16792	26414	21703	17578	34994	13286	9758	8843	CDS	peg.208	213439	214221	783	-	Chromosome (plasmid) partitioning protein ParA	CDW43_RS00970	CDW43_RS00970	AAA family ATPase	AAA family ATPase			9089	7727	22641	10090	18191	11296	16727	14149	2501		33622	21445.7	33734.4	27717.8	22449.6	44692.2	16968.1	12462.3	11293.7
CDS	peg.232	Q7A_231	240124	240750	627	-	rRNA small subunit 7-methylguanosine (m7G) methyltransferase GidB	16S rRNA methyltransferase G; AFI83090.1	7985	4575	6892	9836	7419	11078	14579	10699	9585	CDS	peg.209	214227	214853	627	-	rRNA small subunit 7-methylguanosine (m7G) methyltransferase GidB	CDW43_RS00975	CDW43_RS00975	16S rRNA (guanine(527)-N(7))-methyltransferase RsmG	16S rRNA (guanine(527)-N(7))-methyltransferase RsmG			3664	2343	5678	3323	5522	2626	9890	9709	1332		12735.2	7296.65	10992	15687.4	11832.5	17668.3	23252	17063.8	15287.1
CDS	peg.233	Q7A_232	240750	242633	1884	-	tRNA uridine 5-carboxymethylaminomethyl modification enzyme GidA	tRNA uridine-5-carboxymethylaminomethyl(34) synthesis enzyme MnmG; AFI83091.1	26795	17075	25775	37819	28044	43405	29958	23041	22662	CDS	peg.210	214853	216736	1884	-	tRNA uridine 5-carboxymethylaminomethyl modification enzyme GidA	CDW43_RS00980	CDW43_RS00980	tRNA uridine-5-carboxymethylaminomethyl(34) synthesis enzyme MnmG	tRNA uridine-5-carboxymethylaminomethyl(34) synthesis enzyme MnmG			11112	8988	21776	19857	26246	15017	18327	18740	2694		14222.4	9063.16	13681	20073.8	14885.4	23038.7	15901.3	12229.8	12028.7
CDS	peg.234	Q7A_233	242782	243141	360	+	Diacylglycerol kinase (EC 2.7.1.107)	diacylglycerol kinase; AFI83092.1	4064	2661	4323	4661	3930	7048	2780	2466	2726	CDS	peg.213	218074	218259	186	+	Diacylglycerol kinase (EC 2.7.1.107)	CDW43_RS00995	CDW43_RS00995	diacylglycerol kinase	diacylglycerol kinase			1757	1562	4254	3682	4576	2487	4267	3835	881		11288.9	7391.67	12008.3	12947.2	10916.7	19577.8	7722.22	6850	7572.22
CDS	peg.235	Q7A_234	243138	243914	777	-	Prolipoprotein diacylglyceryl transferase (EC 2.4.99.-)	prolipoprotein diacylglyceryl transferase; AFI83093.1	3343	1977	2874	2396	2874	4822	3005	2437	2330	CDS	peg.214	218256	219032	777	-	Prolipoprotein diacylglyceryl transferase (EC 2.4.99.-)	CDW43_RS01000	CDW43_RS01000	prolipoprotein diacylglyceryl transferase	prolipoprotein diacylglyceryl transferase			1669	1307	3014	2504	3086	1707	4646	4254	843		4302.45	2544.4	3698.84	3083.66	3698.84	6205.92	3867.44	3136.42	2998.71
CDS	peg.236	Q7A_235	244195	244914	720	+	Conserved hypothetical protein 2001	hypothetical protein; AFI83094.1	1617	1231	1663	931	948	1419	549	505	496	CDS	peg.215	219313	220032	720	+	Conserved hypothetical protein 2001	CDW43_RS01005	CDW43_RS01005	TorF family putative porin	TorF family putative porin			590	392	709	536	796	424	847	654	444		2245.83	1709.72	2309.72	1293.06	1316.67	1970.83	762.5	701.389	688.889
CDS	peg.237	Q7A_236	244970	245308	339	+	Nitrogen regulatory protein P-II	transcriptional regulator; AFI83095.1	1471	1082	1587	1487	1154	1933	1111	1029	1045	CDS	peg.216	220088	220426	339	+	Nitrogen regulatory protein P-II	CDW43_RS01010	CDW43_RS01010	P-II family nitrogen regulator	P-II family nitrogen regulator			494	451	874	849	1219	665	1043	1191	370		4339.23	3191.74	4681.42	4386.43	3404.13	5702.06	3277.29	3035.4	3082.6
CDS	peg.238	Q7A_237	245327	246610	1284	+	Ammonium transporter	ammonium transporter; AFI83096.1	7613	4581	6773	6028	6444	10060	4425	3566	3718	CDS	peg.217	220523	221728	1206	+	Ammonium transporter	#N/A	CDW43_RS01015	#N/A	ammonium transporter			3611	2578	4594	2988	4651	2585	3157	3378	835		5929.13	3567.76	5274.92	4694.7	5018.69	7834.89	3446.26	2777.26	2895.64
CDS	peg.239	Q7A_238	246682	247746	1065	-	Uroporphyrinogen III decarboxylase (EC 4.1.1.37)	uroporphyrinogen decarboxylase; AFI83097.1	15047	8472	13510	12590	9672	17645	20662	17810	18426	CDS	peg.218	221800	222864	1065	-	Uroporphyrinogen III decarboxylase (EC 4.1.1.37)	CDW43_RS01020	CDW43_RS01020	uroporphyrinogen decarboxylase	uroporphyrinogen decarboxylase			5866	4719	13464	6222	10395	5900	11729	10474	1183		14128.6	7954.93	12685.4	11821.6	9081.69	16568.1	19400.9	16723	17301.4
CDS	peg.240	Q7A_239	247880	249286	1407	-	Glutamate synthase [NADPH] small chain (EC 1.4.1.13)	glutamate synthase small subunit; AFI83098.2	44496	21977	36594	37329	33276	55523	72230	64531	66510	CDS	peg.219	222998	224404	1407	-	Glutamate synthase [NADPH] small chain (EC 1.4.1.13)	CDW43_RS01025	CDW43_RS01025	FAD-dependent oxidoreductase	FAD-dependent oxidoreductase			18395	15417	36710	22753	33579	16813	30561	31390	3546		31624.7	15619.8	26008.5	26530.9	23650.3	39462	51336.2	45864.3	47270.8
CDS	peg.241	Q7A_240	249310	253701	4392	-	Glutamate synthase [NADPH] large chain (EC 1.4.1.13)	glutamate synthase large subunit; AFI83099.2	173177	96309	154846	185932	149660	235193	328625	316106	344868	CDS	peg.220	224428	228819	4392	-	Glutamate synthase [NADPH] large chain (EC 1.4.1.13)	CDW43_RS01030	#N/A	glutamate synthase large subunit	#N/A			84039	69492	148734	105348	152490	79915	120668	146325	18917		39430.1	21928.3	35256.4	42334.2	34075.6	53550.3	74823.5	71973.1	78521.9
CDS	peg.242	#N/A	253836	253961	126	-	hypothetical protein	#N/A	6846	3564	5587	7536	6523	10095	11870	12455	15348	CDS	peg.221	228954	229079	126	-	hypothetical protein	#N/A	#N/A	#N/A	#N/A			2688	2415	5498	5365	7590	3879	5049	6159	1053		54333.3	28285.7	44341.3	59809.5	51769.8	80119	94206.3	98849.2	121810
CDS	peg.243	Q7A_242	254035	254529	495	+	Phosphoribosylaminoimidazole carboxylase catalytic subunit (EC 4.1.1.21)	5-(carboxyamino)imidazole ribonucleotide mutase; AFI83101.1	11613	6636	10996	10035	7870	13787	8187	8288	9440	CDS	peg.222	229153	229647	495	+	Phosphoribosylaminoimidazole carboxylase catalytic subunit (EC 4.1.1.21)	CDW43_RS01035	CDW43_RS01035	5-(carboxyamino)imidazole ribonucleotide mutase	5-(carboxyamino)imidazole ribonucleotide mutase			4573	4307	9021	5458	8318	4605	7532	6695	1139		23460.6	13406.1	22214.1	20272.7	15899	27852.5	16539.4	16743.4	19070.7
CDS	peg.244	Q7A_243	254544	255674	1131	+	Phosphoribosylaminoimidazole carboxylase ATPase subunit (EC 4.1.1.21)	5-(carboxyamino)imidazole ribonucleotide synthase; AFI83102.1	18873	13718	20630	17235	13067	25038	11628	10331	10812	CDS	peg.223	229662	230792	1131	+	Phosphoribosylaminoimidazole carboxylase ATPase subunit (EC 4.1.1.21)	CDW43_RS01040	CDW43_RS01040	5-(carboxyamino)imidazole ribonucleotide synthase	5-(carboxyamino)imidazole ribonucleotide synthase			6913	7030	15510	6832	11483	7560	11164	8733	1356		16687	12129.1	18240.5	15238.7	11553.5	22137.9	10281.2	9134.39	9559.68
CDS	peg.245	Q7A_244	255734	255949	216	+	Mll3944 protein	selT/selW/selH selenoprotein domain-containing protein; AFI83103.2	4416	2987	4368	3968	3433	5976	2499	2332	2406	CDS	peg.224	230834	231067	234	+	Mll3944 protein	#N/A	CDW43_RS01045	#N/A	SelT/SelW/SelH family protein			1805	1674	3730	1910	2931	1895	2391	1821	291		20444.4	13828.7	20222.2	18370.4	15893.5	27666.7	11569.4	10796.3	11138.9
CDS	peg.246	Q7A_245	256003	258285	2283	-	DNA topoisomerase I (EC 5.99.1.2)	DNA topoisomerase I; AFI83104.1	45141	28551	44434	35204	29685	60109	34647	29767	31556	CDS	peg.225	231121	233403	2283	-	DNA topoisomerase I (EC 5.99.1.2)	CDW43_RS01050	CDW43_RS01050	type I DNA topoisomerase	type I DNA topoisomerase			14156	12834	39216	19554	33837	19364	31340	28601	4220		19772.7	12505.9	19463	15420.1	13002.6	26329	15176.1	13038.5	13822.2
CDS	peg.247	Q7A_246	258370	258837	468	-	Protein of unknown function Smg	hypothetical protein; AFI83105.1	36032	21780	33912	42149	31773	54831	51417	53131	53640	CDS	peg.226	233488	233955	468	-	Protein of unknown function Smg	CDW43_RS01055	CDW43_RS01055	DUF494 domain-containing protein	DUF494 domain-containing protein			11506	9168	39606	36160	48909	25203	38173	39572	6499		76991.5	46538.5	72461.5	90062	67891	117160	109865	113528	114615
CDS	peg.248	Q7A_247	258861	259982	1122	-	Rossmann fold nucleotide-binding protein Smf possibly involved in DNA uptake	DNA processing protein DprA; AFI83106.1	28247	17749	27340	33683	23968	45506	23066	22775	24034	CDS	peg.227	233979	235100	1122	-	Rossmann fold nucleotide-binding protein Smf possibly involved in DNA uptake	CDW43_RS01060	CDW43_RS01060	DNA-processing protein DprA	DNA-processing protein DprA			10407	9063	31895	21139	32407	18195	14001	14956	2494		25175.6	15819.1	24367.2	30020.5	21361.9	40557.9	20557.9	20298.6	21420.7
CDS	peg.249	Q7A_248	259993	261024	1032	-	Uncharacterized protein with LysM domain, COG1652	peptidoglycan-binding protein; AFI83107.1	37436	22802	36067	45272	33527	59919	42234	42480	41507	CDS	peg.228	235111	236142	1032	-	Uncharacterized protein with LysM domain, COG1652	CDW43_RS01065	#N/A	LysM peptidoglycan-binding domain-containing protein	#N/A			14224	12427	40110	36618	47704	25620	20208	22050	5842		36275.2	22095	34948.6	43868.2	32487.4	58061	40924.4	41162.8	40220
CDS	peg.250	Q7A_249	261211	261528	318	+	Cytochrome c553	cytochrome C-555; AFI83108.1	19973	13729	19446	19814	16104	24292	16652	18390	18874	CDS	peg.229	236329	236646	318	+	Cytochrome c553	CDW43_RS01070	CDW43_RS01070	cytochrome c	cytochrome c			7309	6378	19697	29381	31469	15061	8682	10061	2414		62808.2	43173	61150.9	62308.2	50641.5	76389.9	52364.8	57830.2	59352.2
CDS	peg.251	Q7A_250	261567	262070	504	+	Peptide deformylase (EC 3.5.1.88)	peptide deformylase; AFI83109.1	15798	10160	14922	17131	13093	23375	21855	24279	25550	CDS	peg.230	236685	237188	504	+	Peptide deformylase (EC 3.5.1.88)	CDW43_RS01075	CDW43_RS01075	peptide deformylase	peptide deformylase			5173	4658	16263	23810	26015	12021	13419	14213	2558		31345.2	20158.7	29607.1	33990.1	25978.2	46379	43363.1	48172.6	50694.4
CDS	peg.252	Q7A_251	262079	263011	933	+	Methionyl-tRNA formyltransferase (EC 2.1.2.9)	methionyl-tRNA formyltransferase; AFI83110.2	17719	11784	17607	20654	15415	26901	17279	19533	21979	CDS	peg.231	237197	238129	933	+	Methionyl-tRNA formyltransferase (EC 2.1.2.9)	CDW43_RS01080	CDW43_RS01080	methionyl-tRNA formyltransferase	methionyl-tRNA formyltransferase			5538	5057	16320	16996	21701	11955	12116	12380	2117		18991.4	12630.2	18871.4	22137.2	16522	28832.8	18519.8	20935.7	23557.3
CDS	peg.253	Q7A_252	263004	264311	1308	+	Ribosomal RNA small subunit methyltransferase B (EC 2.1.1.-)	16S rRNA (cytosine(967)-C(5))-methyltransferase; AFI83111.1	18446	11512	17262	24164	18060	31945	16459	19535	23092	CDS	peg.232	238122	239429	1308	+	Ribosomal RNA small subunit methyltransferase B (EC 2.1.1.-)	CDW43_RS01085	CDW43_RS01085	16S rRNA (cytosine(967)-C(5))-methyltransferase RsmB	16S rRNA (cytosine(967)-C(5))-methyltransferase RsmB			6018	5146	17589	14863	21485	11959	10623	10743	1262		14102.4	8801.22	13197.2	18474	13807.3	24422.8	12583.3	14935	17654.4
CDS	peg.254	Q7A_253	264277	264870	594	+	Probable proline rich signal peptide protein	hypothetical protein; AFI83112.1	11118	7039	10288	13343	10038	17380	8101	9084	11020	CDS	peg.233	239407	239988	582	+	Probable proline rich signal peptide protein	CDW43_RS01090	CDW43_RS01090	DUF4390 domain-containing protein	DUF4390 domain-containing protein			3978	3082	10008	6786	10954	6193	5317	5431	784		18717.2	11850.2	17319.9	22463	16899	29259.3	13638	15292.9	18552.2
CDS	peg.255	Q7A_254	264855	267014	2160	+	Nitrogen regulation protein NtrY (EC 2.7.3.-)	two-component sensor histidine kinase; AFI83113.1	16760	10721	16269	20847	14869	28252	11427	12083	13779	CDS	peg.234	239973	242132	2160	+	Nitrogen regulation protein NtrY (EC 2.7.3.-)	CDW43_RS01095	CDW43_RS01095	ATP-binding protein	ATP-binding protein			5322	4459	16775	11422	17858	10560	8648	8529	1291		7759.26	4963.43	7531.94	9651.39	6883.8	13079.6	5290.28	5593.98	6379.17
CDS	peg.256	Q7A_255	267017	268291	1275	+	Nitrogen regulation protein NtrX	sigma-54-dependent Fis family transcriptional regulator; AFI83114.1	27551	18376	26748	30392	23553	42473	18931	18612	20153	CDS	peg.235	242135	243409	1275	+	Nitrogen regulation protein NtrX	CDW43_RS01100	CDW43_RS01100	sigma-54 dependent transcriptional regulator	sigma-54 dependent transcriptional regulator			10779	9328	27285	23070	30796	16855	12601	13130	2627		21608.6	14412.5	20978.8	23836.9	18472.9	33312.2	14847.8	14597.6	15806.3
CDS	peg.257	Q7A_256	268301	269674	1374	+	Trk system potassium uptake protein TrkA	Trk system potassium transport protein TrkA; AFI83115.1	26298	16818	25514	27332	19321	36728	9752	9352	9668	CDS	peg.236	243419	244792	1374	+	Trk system potassium uptake protein TrkA	CDW43_RS01105	CDW43_RS01105	Trk system potassium transporter TrkA	Trk system potassium transporter TrkA			9263	7948	23725	16620	25035	14842	8317	7942	1051		19139.7	12240.2	18569.1	19892.3	14061.9	26730.7	7097.53	6806.4	7036.39
CDS	peg.258	Q7A_257	269714	270235	522	+	UPF0301 protein YqgE	DUF179 domain-containing protein; AFI83116.2	9181	5972	8641	9042	6736	13421	3359	2904	2839	CDS	peg.237	244796	245353	558	+	UPF0301 protein YqgE	#N/A	CDW43_RS01110	#N/A	YqgE/AlgH family protein			3460	2894	9686	5747	9324	5577	3292	2592	383		17588.1	11440.6	16553.6	17321.8	12904.2	25710.7	6434.87	5563.22	5438.7
CDS	peg.259	Q7A_258	270232	270651	420	+	Putative Holliday junction resolvase YggF	Holliday junction resolvase RuvX; AFI83117.1	10971	7035	10469	9856	7525	14720	5278	5085	4666	CDS	peg.238	245350	245769	420	+	Putative Holliday junction resolvase YqgF	#N/A	CDW43_RS01115	#N/A	Holliday junction resolvase RuvX			4187	3678	12697	7453	11690	6810	6494	5696	1082		26121.4	16750	24926.2	23466.7	17916.7	35047.6	12566.7	12107.1	11109.5
CDS	peg.260	Q7A_259	270654	271178	525	+	Uracil phosphoribosyltransferase (EC 2.4.2.9) / Pyrimidine operon regulatory protein PyrR	bifunctional pyr operon transcriptional regulator/uracil phosphoribosyltransferase; AFI83118.2	9126	5388	7914	9445	7203	12617	6222	6094	5726	CDS	peg.239	245772	246296	525	+	Uracil phosphoribosyltransferase (EC 2.4.2.9) / Pyrimidine operon regulatory protein PyrR	#N/A	CDW43_RS01120	#N/A	bifunctional pyr operon transcriptional regulator/uracil phosphoribosyltransferase PyrR			3967	3230	10531	6300	9701	5444	6668	5811	1146		17382.9	10262.9	15074.3	17990.5	13720	24032.4	11851.4	11607.6	10906.7
CDS	peg.261	Q7A_260	271168	272139	972	+	Aspartate carbamoyltransferase (EC 2.1.3.2)	aspartate carbamoyltransferase; AFI83119.1	16891	11070	16429	18701	13738	25245	6535	6430	6594	CDS	peg.240	246286	247257	972	+	Aspartate carbamoyltransferase (EC 2.1.3.2)	CDW43_RS01125	CDW43_RS01125	aspartate carbamoyltransferase catalytic subunit	aspartate carbamoyltransferase catalytic subunit			8783	7573	22093	12695	21100	12711	8447	6856	1256		17377.6	11388.9	16902.3	19239.7	14133.7	25972.2	6723.25	6615.23	6783.95
CDS	peg.262	Q7A_261	272139	273422	1284	+	Dihydroorotase (EC 3.5.2.3)	dihydroorotase; AFI83120.1	24933	14951	23474	20764	16083	32153	7362	5903	5554	CDS	peg.241	247257	248540	1284	+	Dihydroorotase (EC 3.5.2.3)	CDW43_RS01130	CDW43_RS01130	dihydroorotase	dihydroorotase			14066	11301	29728	18038	30028	16711	11898	11847	1714		19418.2	11644.1	18281.9	16171.3	12525.7	25041.3	5733.64	4597.35	4325.55
CDS	peg.263	Q7A_262	273442	273618	177	+	hypothetical protein	DUF3012 domain-containing protein; AFI83121.1	3868	2270	3354	2938	2285	4712	1477	1277	1303	CDS	peg.242	248559	248735	177	+	hypothetical protein	CDW43_RS01135	CDW43_RS01135	DUF3012 domain-containing protein	DUF3012 domain-containing protein			854	811	2498	1195	2146	1207	2278	2054	333		21853.1	12824.9	18949.2	16598.9	12909.6	26621.5	8344.63	7214.69	7361.58
CDS	peg.264	Q7A_263	273615	274370	756	+	hypothetical protein	HAD family hydrolase; AFI83122.1	12281	8159	12852	9515	6587	16213	5721	4876	6066	CDS	peg.243	248732	249496	765	+	hypothetical protein	CDW43_RS01140	CDW43_RS01140	HAD family hydrolase	HAD family hydrolase			2790	2356	8544	4393	7045	4832	12732	12018	937		16244.7	10792.3	17000	12586	8712.96	21445.8	7567.46	6449.74	8023.81
CDS	peg.265	Q7A_265	275101	275937	837	-	Pseudoazurin	pseudoazurin precursor; AFI83123.1	45653	26203	39491	33946	35612	61511	26441	26530	28601	CDS	peg.244	250185	251021	837	-	Pseudoazurin	CDW43_RS01150	CDW43_RS01150	plastocyanin/azurin family copper-binding protein	plastocyanin/azurin family copper-binding protein			9445	7428	22266	19573	25570	12278	21751	20196	6118		54543.6	31305.9	47181.6	40556.8	42547.2	73489.8	31590.2	31696.5	34170.8
CDS	peg.266	Q7A_266	276083	278302	2220	-	Isocitrate dehydrogenase [NADP] (EC 1.1.1.42) Monomeric isocitrate dehydrogenase [NADP] (EC 1.1.1.42)	isocitrate dehydrogenase (NADP(+)); AFI83124.1	20210	12723	19524	18113	15290	27448	26392	28061	31890	CDS	peg.245	251167	253386	2220	-	Isocitrate dehydrogenase [NADP] (EC 1.1.1.42) Monomeric isocitrate dehydrogenase [NADP] (EC 1.1.1.42)	CDW43_RS01155	CDW43_RS01155	NADP-dependent isocitrate dehydrogenase	NADP-dependent isocitrate dehydrogenase			6452	5705	16439	14353	18643	9472	14508	14324	2840		9103.6	5731.08	8794.59	8159.01	6887.39	12364	11888.3	12640.1	14364.9
CDS	peg.267	Q7A_267	278790	279812	1023	-	Ferric iron ABC transporter, ATP-binding protein	ABC transporter ATP-binding protein; AFI83125.1	16930	10220	16307	13843	12012	21377	7562	7651	8134	CDS	peg.246	253874	254896	1023	-	Ferric iron ABC transporter, ATP-binding protein	CDW43_RS01160	CDW43_RS01160	ABC transporter ATP-binding protein	ABC transporter ATP-binding protein			6575	5213	13435	6796	10936	6537	6951	6281	1347		16549.4	9990.22	15940.4	13531.8	11741.9	20896.4	7391.98	7478.98	7951.12
CDS	peg.268	Q7A_268	279809	281275	1467	-	Ferric iron ABC transporter, permease protein	iron ABC transporter permease; AFI83126.2	17908	9723	15825	14109	12716	22064	7373	7590	8024	CDS	peg.247	254893	256359	1467	-	Ferric iron ABC transporter, permease protein	CDW43_RS01165	#N/A	iron ABC transporter permease	#N/A			6998	5218	13875	7309	11989	7251	4580	4308	875		12207.2	6627.81	10787.3	9617.59	8668.03	15040.2	5025.9	5173.82	5469.67
CDS	peg.269	Q7A_269	281329	282366	1038	-	Ferric iron ABC transporter, iron-binding protein	ABC transporter substrate-binding protein; AFI83127.1	20319	14062	19701	16883	15369	26026	7080	7649	8358	CDS	peg.248	256413	257450	1038	-	Ferric iron ABC transporter, iron-binding protein	CDW43_RS01170	CDW43_RS01170	extracellular solute-binding protein	extracellular solute-binding protein			6758	6206	14035	12056	16685	9155	5646	5709	2491		19575.1	13547.2	18979.8	16264.9	14806.4	25073.2	6820.81	7368.98	8052.02
CDS	peg.270	Q7A_270	282367	283179	813	-	hypothetical protein	hypothetical protein; AFI83128.1	11888	8121	11019	9467	9435	16394	6396	7480	7605	CDS	peg.249	257451	258263	813	-	hypothetical protein	CDW43_RS01175	CDW43_RS01175	hypothetical protein	hypothetical protein			4045	3413	8577	7512	10200	5217	4481	4713	6582		14622.4	9988.93	13553.5	11644.5	11605.2	20164.8	7867.16	9200.49	9354.24
CDS	peg.271	#N/A	283814	283927	114	-	hypothetical protein	#N/A	258	216	329	287	337	543	462	589	611	CDS	peg.250	258898	259011	114	-	hypothetical protein	#N/A	#N/A	#N/A	#N/A			142	130	393	396	455	222	342	458	127		2263.16	1894.74	2885.96	2517.54	2956.14	4763.16	4052.63	5166.67	5359.65
CDS	peg.272	Q7A_272	284473	286641	2169	+	TonB-dependent receptor	TonB-dependent receptor; AFI83130.1	13060	8887	13888	5744	5551	12695	4547	4639	5493	CDS	peg.251	259557	261725	2169	+	TonB-dependent receptor	CDW43_RS01185	CDW43_RS01185	TonB-dependent receptor	TonB-dependent receptor			4113	3524	11446	6530	9469	5302	5153	5611	3502		6021.21	4097.28	6402.95	2648.22	2559.24	5852.93	2096.36	2138.77	2532.5
CDS	peg.273	#N/A	287220	287342	123	+	hypothetical protein	#N/A	7049	4223	7547	1751	1993	5887	852	516	496	CDS	peg.252	262304	262426	123	+	hypothetical protein	#N/A	#N/A	#N/A	#N/A			2992	2871	13065	5125	10802	5959	4834	3004	899		57308.9	34333.3	61357.7	14235.8	16203.3	47861.8	6926.83	4195.12	4032.52
CDS	peg.274	Q7A_274	287464	287889	426	-	Pseudoazurin	copper-binding protein; AFI83132.1	232152	167842	249788	168837	156378	335041	55102	36177	25993	CDS	peg.253	262548	262973	426	-	Pseudoazurin	CDW43_RS01190	CDW43_RS01190	plastocyanin/azurin family copper-binding protein	plastocyanin/azurin family copper-binding protein			94614	85626	290176	280500	416645	210483	53497	47535	13562		544958	393995	586357	396331	367085	786481	129347	84922.5	61016.4
CDS	peg.275	Q7A_275	288196	289272	1077	-	Putative permease PerM (= YfgO)	AI-2E family transporter; AFI83133.1	6083	3495	5162	5226	6265	8599	5308	6264	6664	CDS	peg.255	263280	264356	1077	-	Putative permease PerM (= YfgO)	CDW43_RS01200	CDW43_RS01200	AI-2E family transporter	AI-2E family transporter			3081	2344	5803	6269	7929	3750	3676	3970	1540		5648.1	3245.13	4792.94	4852.37	5817.08	7984.22	4928.51	5816.16	6187.56
CDS	peg.276	Q7A_278	289436	290515	1080	+	Probable Co/Zn/Cd efflux system membrane fusion protein	efflux transporter periplasmic adaptor subunit; AFI83136.2	10693	7089	9861	7715	7131	14895	2984	3340	3863	CDS	peg.256	264424	265599	1176	+	Probable Co/Zn/Cd efflux system membrane fusion protein	CDW43_RS01205	CDW43_RS01205	efflux RND transporter periplasmic adaptor subunit	efflux RND transporter periplasmic adaptor subunit			3556	3023	11498	8354	13059	7484	2712	2943	797		9900.93	6563.89	9130.56	7143.52	6602.78	13791.7	2762.96	3092.59	3576.85
CDS	peg.277	Q7A_279	290522	293686	3165	+	Acriflavin resistance protein	AcrB/AcrD/AcrF family protein; AFI83137.1	28396	18438	25448	20903	19060	38456	9736	10258	12621	CDS	peg.257	265606	268770	3165	+	Acriflavin resistance protein	CDW43_RS01210	CDW43_RS01210	efflux RND transporter permease subunit	efflux RND transporter permease subunit			9941	8074	29439	17270	29616	18203	7736	7282	1632		8971.88	5825.59	8040.44	6604.42	6022.12	12150.4	3076.15	3241.07	3987.68
CDS	peg.278	Q7A_280	293662	294159	498	-	lipoprotein Blc	lipocalin; AFI83138.1	3264	2164	2922	2259	2029	4400	1615	1652	2104	CDS	peg.258	268746	269243	498	-	lipoprotein Blc	CDW43_RS01215	#N/A	lipocalin family protein	#N/A			1084	868	3035	3029	3340	1939	1614	1668	361		6554.22	4345.38	5867.47	4536.14	4074.3	8835.34	3242.97	3317.27	4224.9
CDS	peg.279	Q7A_281	294241	294498	258	+	Alcohol dehydrogenase, class IV	TIGR03643 family protein; AFI83139.1	1286	633	1058	653	700	1386	799	607	754	CDS	peg.259	269325	269582	258	+	Alcohol dehydrogenase, class IV	CDW43_RS01220	CDW43_RS01220	TIGR03643 family protein	TIGR03643 family protein			330	260	706	1046	1068	440	727	722	163		4984.5	2453.49	4100.78	2531.01	2713.18	5372.09	3096.9	2352.71	2922.48
CDS	peg.280	Q7A_282	294524	294919	396	-	hypothetical protein	MAPEG family protein; AFI83140.1	2137	1115	1746	1119	1126	2356	1485	1368	1387	CDS	peg.260	269608	270003	396	-	hypothetical protein	CDW43_RS01225	CDW43_RS01225	MAPEG family protein	MAPEG family protein			667	602	1914	1606	2107	938	1407	1391	336		5396.46	2815.66	4409.09	2825.76	2843.43	5949.49	3750	3454.55	3502.53
CDS	peg.281	Q7A_283	294977	295987	1011	-	Fructose-1,6-bisphosphatase, type I (EC 3.1.3.11)	fructose-bisphosphatase class I; AFI83141.1	10474	6525	10853	7573	6218	13923	5916	5369	5968	CDS	peg.261	270061	271071	1011	-	Fructose-1,6-bisphosphatase, type I (EC 3.1.3.11)	CDW43_RS01230	CDW43_RS01230	class 1 fructose-bisphosphatase	class 1 fructose-bisphosphatase			2706	2605	9452	5887	7813	4706	6488	6250	1397		10360	6454.01	10734.9	7490.6	6150.35	13771.5	5851.63	5310.58	5903.07
CDS	peg.282	Q7A_284	296147	296962	816	-	Formylmethanofuran dehydrogenase (tungsten) subunit C (EC 1.2.99.5)	formylmethanofuran dehydrogenase subunit C; AFI83142.1	33582	19203	29182	26225	26136	42128	17484	16542	16131	CDS	peg.262	271231	272046	816	-	Formylmethanofuran dehydrogenase (tungsten) subunit C (EC 1.2.99.5)	CDW43_RS01235	CDW43_RS01235	formylmethanofuran dehydrogenase subunit C	formylmethanofuran dehydrogenase subunit C			12338	9721	22732	12368	19770	10645	11822	9864	1684		41154.4	23533.1	35762.3	32138.5	32029.4	51627.5	21426.5	20272.1	19768.4
CDS	peg.283	Q7A_285	296959	297861	903	-	Formylmethanofuran--tetrahydromethanopterin N-formyltransferase (EC 2.3.1.101)	formylmethanofuran--tetrahydromethanopterin N-formyltransferase; AFI83143.1	43819	28315	43671	46152	36632	62029	25068	24238	22929	CDS	peg.263	272043	272945	903	-	Formylmethanofuran--tetrahydromethanopterin N-formyltransferase (EC 2.3.1.101)	CDW43_RS01240	CDW43_RS01240	formylmethanofuran--tetrahydromethanopterin N-formyltransferase	formylmethanofuran--tetrahydromethanopterin N-formyltransferase			15391	12866	36722	19276	30732	17696	15777	14115	2501		48526	31356.6	48362.1	51109.6	40567	68692.1	27760.8	26841.6	25392
CDS	peg.284	Q7A_286	297858	299525	1668	-	Formylmethanofuran dehydrogenase subunit A (EC 1.2.99.5)	formylmethanofuran dehydrogenase subunit A; AFI83144.1	65882	42556	61526	54361	47090	87090	30170	27984	28791	CDS	peg.264	272942	274609	1668	-	Formylmethanofuran dehydrogenase subunit A (EC 1.2.99.5)	CDW43_RS01245	CDW43_RS01245	formylmethanofuran dehydrogenase subunit A	formylmethanofuran dehydrogenase subunit A			21194	18401	51813	28450	46245	25924	22807	19393	4526		39497.6	25513.2	36886.1	32590.5	28231.4	52212.2	18087.5	16777	17260.8
CDS	peg.285	Q7A_287	299538	300812	1275	-	Formylmethanofuran dehydrogenase subunit B (EC 1.2.99.5)	formylmethanofuran dehydrogenase subunit B; AFI83145.1	35421	24202	34378	32227	26624	52056	18469	16941	17924	CDS	peg.265	274622	275896	1275	-	Formylmethanofuran dehydrogenase subunit B (EC 1.2.99.5)	CDW43_RS01250	CDW43_RS01250	formylmethanofuran dehydrogenase subunit B	formylmethanofuran dehydrogenase subunit B			12014	10945	28595	17372	28183	16551	13933	13304	3881		27781.2	18982	26963.1	25276.1	20881.6	40828.2	14485.5	13287.1	14058
CDS	peg.286	#N/A	300780	300926	147	+	hypothetical protein	#N/A	6870	4476	6779	6407	5012	9327	3253	2753	3236	CDS	peg.266	275864	276010	147	+	hypothetical protein	#N/A	#N/A	#N/A	#N/A			2470	2146	5703	3559	5585	3148	2736	2671	697		46734.7	30449	46115.6	43585	34095.2	63449	22129.3	18727.9	22013.6
CDS	peg.287	Q7A_289	300906	301451	546	-	FIG00858078: hypothetical protein	SPOR domain-containing protein; AFI83147.1	12664	8877	13262	13459	10267	19990	8753	7943	8894	CDS	peg.267	275990	276535	546	-	FIG00858078: hypothetical protein	CDW43_RS01255	CDW43_RS01255	SPOR domain-containing protein	SPOR domain-containing protein			3999	3760	11668	7370	11006	6591	7079	6612	1493		23194.1	16258.2	24289.4	24650.2	18804	36611.7	16031.1	14547.6	16289.4
CDS	peg.288	Q7A_290	301514	303277	1764	-	Arginyl-tRNA synthetase (EC 6.1.1.19)	arginine--tRNA ligase; AFI83148.1	29931	19448	30374	25237	21202	41338	24771	21680	23025	CDS	peg.268	276598	278361	1764	-	Arginyl-tRNA synthetase (EC 6.1.1.19)	CDW43_RS01260	CDW43_RS01260	arginine--tRNA ligase	arginine--tRNA ligase			10690	9327	24073	11652	18902	11336	24459	20655	3765		16967.7	11024.9	17218.8	14306.7	12019.3	23434.2	14042.5	12290.2	13052.7
CDS	peg.289	Q7A_291	303355	305529	2175	-	Helicase PriA essential for oriC/DnaA-independent DNA replication	primosomal protein N'; AFI83149.1	10597	6603	10019	11749	11232	17421	10510	11098	12894	CDS	peg.269	278439	280613	2175	-	Helicase PriA essential for oriC/DnaA-independent DNA replication	CDW43_RS01265	CDW43_RS01265	primosomal protein N'	primosomal protein N'			4832	3726	11935	10408	13964	7312	8741	9972	2120		4872.18	3035.86	4606.44	5401.84	5164.14	8009.66	4832.18	5102.53	5928.28
CDS	peg.290	Q7A_292	305775	307325	1551	-	Sodium-dependent phosphate transporter	sodium-dependent phosphate transporter; AFI83150.1	2661	1660	2474	2736	2533	4168	4272	4257	5538	CDS	peg.270	280859	282472	1614	-	Sodium-dependent phosphate transporter	CDW43_RS01270	#N/A	Na/Pi symporter	#N/A			1133	996	2812	3217	3858	1960	3010	3915	798		1715.67	1070.28	1595.1	1764.02	1633.14	2687.3	2754.35	2744.68	3570.6
CDS	peg.291	Q7A_293	307487	307972	486	+	Dihydrofolate reductase (EC 1.5.1.3)	dihydrofolate reductase; AFI83151.1	9370	5690	8553	10472	8813	12872	10450	11241	13628	CDS	peg.272	282571	283056	486	+	Dihydrofolate reductase (EC 1.5.1.3)	CDW43_RS01275	CDW43_RS01275	type 3 dihydrofolate reductase	type 3 dihydrofolate reductase			3748	3140	8872	10708	12868	6356	7339	8353	1991		19279.8	11707.8	17598.8	21547.3	18133.7	26485.6	21502.1	23129.6	28041.2
CDS	peg.292	Q7A_294	307969	308205	237	-	DNA-binding protein inhibitor Id-2-related protein	TIGR02647 family protein; AFI83152.1	7005	4784	6754	7479	6190	9729	8183	9342	10227	CDS	peg.273	283053	283289	237	-	DNA-binding protein inhibitor Id-2-related protein	CDW43_RS01280	CDW43_RS01280	TIGR02647 family protein	TIGR02647 family protein			3050	2699	7470	10071	11539	5607	5414	6457	1884		29557	20185.7	28497.9	31557	26118.1	41050.6	34527.4	39417.7	43151.9
CDS	peg.293	Q7A_295	308609	308857	249	+	hypothetical protein	hypothetical protein; AFI83153.1	10301	6878	11189	13611	10103	18139	18096	20992	22864	CDS	peg.274	283693	283941	249	+	hypothetical protein	CDW43_RS01285	CDW43_RS01285	hypothetical protein	hypothetical protein			5636	4647	22106	36351	38637	17264	9168	11586	3721		41369.5	27622.5	44935.7	54662.7	40574.3	72847.4	72674.7	84305.2	91823.3
CDS	peg.294	Q7A_296	308869	309213	345	+	Pentapeptide repeat domain protein	pentapeptide repeat protein; AFI83154.1	14467	10764	16015	19800	13777	24478	15551	17770	18971	CDS	peg.275	283953	284297	345	+	Pentapeptide repeat domain protein	CDW43_RS01290	CDW43_RS01290	pentapeptide repeat-containing protein	pentapeptide repeat-containing protein			6402	5599	28274	43121	46472	21896	9429	11800	2855		41933.3	31200	46420.3	57391.3	39933.3	70950.7	45075.4	51507.2	54988.4
CDS	peg.295	Q7A_297	309217	309960	744	-	Twin-arginine translocation protein TatC	twin-arginine translocase subunit TatC; AFI83155.1	14980	9824	15130	15852	12032	23917	14139	15504	18758	CDS	peg.276	284301	285044	744	-	Twin-arginine translocation protein TatC	CDW43_RS01295	CDW43_RS01295	twin-arginine translocase subunit TatC	twin-arginine translocase subunit TatC			5629	4801	20731	21340	25749	13552	15139	15933	2168		20134.4	13204.3	20336	21306.5	16172	32146.5	19004	20838.7	25212.4
CDS	peg.296	Q7A_298	309950	310270	321	-	Twin-arginine translocation protein TatB	twin-arginine translocase subunit TatB; AFI83156.1	7462	4476	7170	5839	5812	10491	7341	7496	8408	CDS	peg.277	285034	285327	294	-	Twin-arginine translocation protein TatB	CDW43_RS01300	#N/A	Sec-independent protein translocase protein TatB	#N/A			5100	4039	9443	6232	9349	5063	8721	8498	1133		23246.1	13943.9	22336.4	18190	18105.9	32682.2	22869.2	23352	26193.1
CDS	peg.297	Q7A_299	310276	310521	246	-	Twin-arginine translocation protein TatA	twin-arginine translocase TatA/TatE family subunit; AFI83157.1	10240	5601	8535	6149	6897	12207	9845	10302	11387	CDS	peg.278	285360	285605	246	-	Twin-arginine translocation protein TatA	CDW43_RS01305	CDW43_RS01305	twin-arginine translocase TatA/TatE family subunit	twin-arginine translocase TatA/TatE family subunit			4334	3429	8265	5436	7744	3991	7237	7153	1398		41626	22768.3	34695.1	24995.9	28036.6	49622	40020.3	41878	46288.6
CDS	peg.298	Q7A_300	310531	310869	339	-	Histidine triad (HIT) nucleotide-binding protein, similarity with At5g48545 and yeast YDL125C (HNT1)	histidine triad nucleotide-binding protein; AFI83158.1	14189	9317	14373	12123	12617	20913	13184	13922	14755	CDS	peg.279	285615	285953	339	-	Histidine triad (HIT) nucleotide-binding protein, similarity with At5g48545 and yeast YDL125C (HNT1)	CDW43_RS01310	CDW43_RS01310	histidine triad nucleotide-binding protein	histidine triad nucleotide-binding protein			6261	5313	15341	10692	14240	8195	8710	9039	2211		41855.5	27483.8	42398.2	35761.1	37218.3	61690.3	38890.9	41067.8	43525.1
CDS	peg.299	Q7A_301	310866	311186	321	-	Phosphoribosyl-ATP pyrophosphatase (EC 3.6.1.31)	phosphoribosyl-ATP diphosphatase; AFI83159.1	14423	9556	14740	12567	10903	20433	7281	7341	7682	CDS	peg.280	285950	286270	321	-	Phosphoribosyl-ATP pyrophosphatase (EC 3.6.1.31)	CDW43_RS01315	CDW43_RS01315	phosphoribosyl-ATP diphosphatase	phosphoribosyl-ATP diphosphatase			5780	4980	15259	9091	13489	7828	6414	5996	1096		44931.5	29769.5	45919	39149.5	33965.7	63654.2	22682.2	22869.2	23931.5
CDS	peg.300	Q7A_302	311183	311566	384	-	Phosphoribosyl-AMP cyclohydrolase (EC 3.5.4.19)	phosphoribosyl-AMP cyclohydrolase; AFI83160.1	24716	14854	23828	18523	14945	30212	7663	7528	7730	CDS	peg.281	286267	286650	384	-	Phosphoribosyl-AMP cyclohydrolase (EC 3.5.4.19)	CDW43_RS01320	CDW43_RS01320	phosphoribosyl-AMP cyclohydrolase	phosphoribosyl-AMP cyclohydrolase			8730	7458	19313	6903	13041	8851	6334	5196	942		64364.6	38682.3	62052.1	48237	38919.3	78677.1	19955.7	19604.2	20130.2
CDS	peg.301	Q7A_303	311563	312336	774	-	Imidazole glycerol phosphate synthase cyclase subunit (EC 4.1.3.-)	imidazole glycerol phosphate synthase cyclase subunit; AFI83161.1	41375	24832	38704	32277	28619	51860	23487	22980	22937	CDS	peg.282	286647	287420	774	-	Imidazole glycerol phosphate synthase cyclase subunit (EC 4.1.3.-)	CDW43_RS01325	CDW43_RS01325	imidazole glycerol phosphate synthase subunit HisF	imidazole glycerol phosphate synthase subunit HisF			13882	11821	27901	10798	20501	12751	14100	12012	2123		53456.1	32082.7	50005.2	41701.6	36975.5	67002.6	30345	29689.9	29634.4
CDS	peg.302	Q7A_304	312342	313091	750	-	Phosphoribosylformimino-5-aminoimidazole carboxamide ribotide isomerase (EC 5.3.1.16)	1-(5-phosphoribosyl)-5-[(5-phosphoribosylamino)methylideneamino] imidazole-4-carboxamide isomerase; AFI83162.1	51579	29009	46190	40689	34674	59273	25257	25442	25576	CDS	peg.283	287426	288175	750	-	Phosphoribosylformimino-5-aminoimidazole carboxamide ribotide isomerase (EC 5.3.1.16)	CDW43_RS01330	CDW43_RS01330	1-(5-phosphoribosyl)-5-[(5-phosphoribosylamino)methylideneamino]imidazole-4-carboxamide isomerase	1-(5-phosphoribosyl)-5-[(5-phosphoribosylamino)methylideneamino]imidazole-4-carboxamide isomerase			22329	16536	35372	14293	26861	15987	17409	15399	2927		68772	38678.7	61586.7	54252	46232	79030.7	33676	33922.7	34101.3
CDS	peg.303	Q7A_305	313117	313752	636	-	Imidazole glycerol phosphate synthase amidotransferase subunit (EC 2.4.2.-)	imidazole glycerol phosphate synthase subunit HisH; AFI83163.1	22754	12856	19810	19063	16313	31821	16814	16235	17571	CDS	peg.284	288201	288836	636	-	Imidazole glycerol phosphate synthase amidotransferase subunit (EC 2.4.2.-)	CDW43_RS01335	CDW43_RS01335	imidazole glycerol phosphate synthase subunit HisH	imidazole glycerol phosphate synthase subunit HisH			7649	6116	16570	7865	13351	7967	18629	16509	2452		35776.7	20213.8	31147.8	29973.3	25649.4	50033	26437.1	25526.7	27627.4
CDS	peg.304	Q7A_306	313800	314393	594	-	Imidazoleglycerol-phosphate dehydratase (EC 4.2.1.19)	imidazoleglycerol-phosphate dehydratase; AFI83164.1	36208	24748	35650	27542	22334	44442	20384	17713	17802	CDS	peg.285	288884	289477	594	-	Imidazoleglycerol-phosphate dehydratase (EC 4.2.1.19)	CDW43_RS01340	CDW43_RS01340	imidazoleglycerol-phosphate dehydratase HisB	imidazoleglycerol-phosphate dehydratase HisB			12549	11116	28230	13732	22197	13852	25413	23424	3773		60956.2	41663.3	60016.8	46367	37599.3	74818.2	34316.5	29819.9	29969.7
CDS	peg.305	Q7A_307	314461	315240	780	+	Fumarate and nitrate reduction regulatory protein	Crp/Fnr family transcriptional regulator; AFI83165.1	14763	8815	13278	12502	9782	17417	12622	13591	13580	CDS	peg.286	289575	290324	750	+	Fumarate and nitrate reduction regulatory protein	CDW43_RS01345	CDW43_RS01345	fumarate/nitrate reduction transcriptional regulator Fnr	fumarate/nitrate reduction transcriptional regulator Fnr			4959	4488	15962	13362	17518	9454	8084	8217	1980		18926.9	11301.3	17023.1	16028.2	12541	22329.5	16182.1	17424.4	17410.3
CDS	peg.307	Q7A_310	316064	317608	1545	-	Proposed peptidoglycan lipid II flippase MurJ	lipid II flippase MurJ; AFI83168.1	10407	5603	9300	9922	7610	13956	10798	10199	12491	CDS	peg.288	291149	292693	1545	-	Proposed peptidoglycan lipid II flippase MurJ	CDW43_RS01355	CDW43_RS01355	murein biosynthesis integral membrane protein MurJ	murein biosynthesis integral membrane protein MurJ			3906	3008	7657	4791	7544	4470	7568	7942	971		6735.92	3626.54	6019.42	6422.01	4925.57	9033.01	6989	6601.29	8084.79
CDS	peg.308	Q7A_311	317661	318281	621	+	hypothetical protein	hypothetical protein; AFI83169.1	3563	2106	3579	3601	2554	5086	5062	5129	6377	CDS	peg.289	292746	293366	621	+	hypothetical protein	CDW43_RS01360	CDW43_RS01360	hypothetical protein	hypothetical protein			1208	1082	2850	2105	2968	1666	4625	4945	660		5737.52	3391.3	5763.29	5798.71	4112.72	8190.02	8151.37	8259.26	10268.9
CDS	peg.309	Q7A_312	318278	319189	912	-	Hydrogen peroxide-inducible genes activator	hydrogen peroxide-inducible genes activator; AFI83170.1	6369	3829	6154	8804	5780	10451	8775	9743	12048	CDS	peg.290	293363	294274	912	-	Hydrogen peroxide-inducible genes activator	CDW43_RS01365	CDW43_RS01365	hydrogen peroxide-inducible genes activator	hydrogen peroxide-inducible genes activator			2726	2185	7038	6909	9617	4902	7111	7560	2285		6983.55	4198.46	6747.81	9653.51	6337.72	11459.4	9621.71	10683.1	13210.5
CDS	peg.310	Q7A_313	319330	319494	165	+	Rubredoxin	rubredoxin; AFI83171.1	2073	1332	2022	2517	1881	3137	1784	1720	1820	CDS	peg.291	294415	294579	165	+	Rubredoxin	CDW43_RS01370	CDW43_RS01370	rubredoxin	rubredoxin			922	794	2370	2690	3646	1563	1510	1934	325		12563.6	8072.73	12254.5	15254.5	11400	19012.1	10812.1	10424.2	11030.3
CDS	peg.311	Q7A_314	319589	320665	1077	+	DNA recombination and repair protein RecF	DNA replication and repair protein RecF; AFI83172.1	8134	4969	7990	8449	5896	11910	9517	8752	10476	CDS	peg.292	294674	295750	1077	+	DNA recombination and repair protein RecF	CDW43_RS01375	CDW43_RS01375	DNA replication/repair protein RecF	DNA replication/repair protein RecF			3731	3040	9796	7101	10585	5659	8136	9585	1137		7552.46	4613.74	7418.76	7844.94	5474.47	11058.5	8836.58	8126.28	9727.02
CDS	peg.312	Q7A_315	320738	323152	2415	+	DNA gyrase subunit B (EC 5.99.1.3)	DNA gyrase subunit B; AFI83173.1	41239	28791	42016	48018	30376	62839	41104	40560	44009	CDS	peg.293	295823	298237	2415	+	DNA gyrase subunit B (EC 5.99.1.3)	CDW43_RS01380	CDW43_RS01380	DNA topoisomerase (ATP-hydrolyzing) subunit B	DNA topoisomerase (ATP-hydrolyzing) subunit B			14123	13181	43292	38719	53046	27528	26580	29087	4651		17076.2	11921.7	17397.9	19883.2	12578.1	26020.3	17020.3	16795	18223.2
CDS	peg.313	Q7A_316	323549	324865	1317	-	NADH dehydrogenase (EC 1.6.99.3)	FAD-dependent oxidoreductase; AFI83174.1	30113	19618	26646	23675	21340	39442	30204	29678	30397	CDS	peg.294	298638	299954	1317	-	NADH dehydrogenase (EC 1.6.99.3)	CDW43_RS01385	CDW43_RS01385	NAD(P)/FAD-dependent oxidoreductase	NAD(P)/FAD-dependent oxidoreductase			10698	9811	28397	27395	33769	15659	25947	26940	6327		22864.8	14896	20232.3	17976.5	16203.5	29948.4	22933.9	22534.5	23080.5
CDS	peg.314	Q7A_317	325003	325563	561	+	Archaeal flavoprotein COG1036	flavoprotein; AFI83175.2	9607	5502	7950	10367	8978	14716	13658	13872	15235	CDS	peg.295	300092	300652	561	+	Archaeal flavoprotein COG1036	CDW43_RS01390	CDW43_RS01390	flavoprotein	flavoprotein			2973	2739	8142	8000	9477	4526	7368	8885	1728		17124.8	9807.49	14171.1	18479.5	16003.6	26231.7	24345.8	24727.3	27156.9
CDS	peg.315	Q7A_318	325556	326983	1428	+	Related to Dihydropteroate synthase	dihydropteroate synthase; AFI83176.1	23610	14332	22214	24540	19256	35174	31599	31509	33351	CDS	peg.296	300645	302072	1428	+	Related to Dihydropteroate synthase	CDW43_RS01395	CDW43_RS01395	DUF6513 domain-containing protein	DUF6513 domain-containing protein			8312	6870	22456	16275	22767	12256	24317	26733	3128		16533.6	10036.4	15556	17184.9	13484.6	24631.7	22128.2	22065.1	23355
CDS	peg.316	Q7A_319	326997	327581	585	+	DUF447 family protein	hypothetical protein; AFI83177.1	9280	6186	10234	10528	6951	13831	6287	6532	7106	CDS	peg.297	302086	302670	585	+	DUF447 family protein	#N/A	CDW43_RS01400	#N/A	DUF447 family protein			2660	2447	10453	5813	9371	5530	4882	4941	640		15863.2	10574.4	17494	17996.6	11882.1	23642.7	10747	11165.8	12147
CDS	peg.317	Q7A_320	327571	328278	708	+	duf556 family protein	hypothetical protein; AFI83178.2	10091	6333	10015	11610	8691	14986	8897	8812	8888	CDS	peg.298	302660	303367	708	+	duf556 family protein	CDW43_RS01405	CDW43_RS01405	(5-formylfuran-3-yl)methyl phosphate synthase	(5-formylfuran-3-yl)methyl phosphate synthase			3005	2769	7743	4685	6925	4146	6097	7125	936		14252.8	8944.92	14145.5	16398.3	12275.4	21166.7	12566.4	12446.3	12553.7
CDS	peg.318	Q7A_321	328338	330617	2280	-	5-methyltetrahydropteroyltriglutamate--homocysteine methyltransferase (EC 2.1.1.14)	5-methyltetrahydropteroyltriglutamate--homocysteine S-methyltransferase; AFI83179.1	4885	2969	4981	6994	6483	8128	5929	5086	5915	CDS	peg.299	303427	305706	2280	-	5-methyltetrahydropteroyltriglutamate--homocysteine methyltransferase (EC 2.1.1.14)	CDW43_RS01410	CDW43_RS01410	5-methyltetrahydropteroyltriglutamate--homocysteine S-methyltransferase	5-methyltetrahydropteroyltriglutamate--homocysteine S-methyltransferase			1761	1562	4746	3640	4901	2794	64182	84925	42787		2142.54	1302.19	2184.65	3067.54	2843.42	3564.91	2600.44	2230.7	2594.3
CDS	peg.319	Q7A_322	330718	331614	897	+	Transcriptional activator MetR	LysR family transcriptional regulator; AFI83180.1	3774	2296	3528	4038	3105	5739	2590	2547	3398	CDS	peg.300	305807	306703	897	+	Transcriptional activator MetR	CDW43_RS01415	CDW43_RS01415	LysR family transcriptional regulator	LysR family transcriptional regulator			1231	1093	2969	2581	3736	2081	1782	1964	507		4207.36	2559.64	3933.11	4501.67	3461.54	6397.99	2887.4	2839.46	3788.18
CDS	peg.320	Q7A_323	331611	332414	804	-	Chemotaxis regulator - transmits chemoreceptor signals to flagelllar motor components CheY	response regulator; AFI83181.1	10655	6779	10657	14025	10186	18726	7475	7667	9410	CDS	peg.301	306700	307503	804	-	Chemotaxis regulator - transmits chemoreceptor signals to flagelllar motor components CheY	CDW43_RS01420	CDW43_RS01420	response regulator	response regulator			3852	3359	10511	8884	12971	7489	5135	5149	760		13252.5	8431.59	13255	17444	12669.2	23291	9297.26	9536.07	11704
CDS	peg.321	Q7A_324	332427	332981	555	-	DJ-1/YajL/PfpI superfamily, includes chaperone protein YajL (former ThiJ), parkinsonism-associated protein DJ-1, peptidases PfpI, Hsp31	DJ-1 family protein; AFI83182.1	18207	10807	15660	19971	18193	28019	15948	18412	19317	CDS	peg.302	307516	308070	555	-	DJ-1/YajL/PfpI superfamily, includes chaperone protein YajL (former ThiJ), parkinsonism-associated protein DJ-1, peptidases PfpI, Hsp31	CDW43_RS01425	CDW43_RS01425	DJ-1/PfpI family protein	DJ-1/PfpI family protein			8044	6338	16638	17325	23507	11067	7139	7937	1534		32805.4	19472.1	28216.2	35983.8	32780.2	50484.7	28735.1	33174.8	34805.4
CDS	peg.322	Q7A_325	332991	334322	1332	-	Carboxyl-terminal protease (EC 3.4.21.102)	peptidase S41; AFI83183.1	46879	29450	42593	56342	45484	75366	44863	50803	52123	CDS	peg.303	308080	309411	1332	-	Carboxyl-terminal protease (EC 3.4.21.102)	CDW43_RS01430	#N/A	S41 family peptidase	#N/A			17862	14953	48607	59298	76337	36571	22774	25236	5377		35194.4	22109.6	31976.7	42298.8	34147.1	56581.1	33680.9	38140.4	39131.4
CDS	peg.323	Q7A_326	334347	335501	1155	-	Lipoprotein NlpD	peptidase M23; AFI83184.1	15843	10451	14979	19524	15642	26443	21997	25310	28830	CDS	peg.304	309436	310545	1110	-	Lipoprotein NlpD	CDW43_RS01435	#N/A	peptidoglycan DD-metalloendopeptidase family protein	#N/A			6371	5100	16356	22129	25203	12099	11840	12615	2356		13716.9	9048.48	12968.8	16903.9	13542.9	22894.4	19045	21913.4	24961
CDS	peg.324	Q7A_327	335504	337036	1533	-	2,3-bisphosphoglycerate-independent phosphoglycerate mutase (EC 5.4.2.1)	2%2C3-bisphosphoglycerate-independent phosphoglycerate mutase; AFI83185.1	18907	11972	16431	23220	20261	29666	34785	41223	43229	CDS	peg.305	310593	312125	1533	-	2,3-bisphosphoglycerate-independent phosphoglycerate mutase (EC 5.4.2.1)	CDW43_RS01440	CDW43_RS01440	2,3-bisphosphoglycerate-independent phosphoglycerate mutase	2,3-bisphosphoglycerate-independent phosphoglycerate mutase			7282	5983	13779	16527	21361	10066	12423	16596	2666		12333.3	7809.52	10718.2	15146.8	13216.6	19351.6	22690.8	26890.4	28199
CDS	peg.325	Q7A_328	337195	337485	291	+	Transcriptional regulator, ArsR family	transcriptional regulator; AFI83186.1	6037	3442	5503	7099	5525	9087	13789	15532	16121	CDS	peg.306	312284	312574	291	+	Transcriptional regulator, ArsR family	CDW43_RS01445	CDW43_RS01445	metalloregulator ArsR/SmtB family transcription factor	metalloregulator ArsR/SmtB family transcription factor			2283	1824	5882	5130	7217	3399	7986	8402	1527		20745.7	11828.2	18910.7	24395.2	18986.3	31226.8	47384.9	53374.6	55398.6
CDS	peg.326	Q7A_329	337521	337940	420	+	FIG136845: Rhodanese-related sulfurtransferase	sulfurtransferase; AFI83187.1	11146	6486	10238	11619	8844	16095	14316	15486	17556	CDS	peg.307	312610	313029	420	+	FIG136845: Rhodanese-related sulfurtransferase	CDW43_RS01450	CDW43_RS01450	rhodanese-like domain-containing protein	rhodanese-like domain-containing protein			3964	3313	11626	9842	13688	6744	10640	10925	1873		26538.1	15442.9	24376.2	27664.3	21057.1	38321.4	34085.7	36871.4	41800
CDS	peg.327	Q7A_330	337957	338214	258	+	Glutaredoxin 3	glutaredoxin 3; AFI83188.1	8603	6066	9539	10276	6561	12819	10570	11659	12832	CDS	peg.308	313046	313303	258	+	Glutaredoxin 3	CDW43_RS01455	CDW43_RS01455	glutaredoxin 3	glutaredoxin 3			2138	2170	8522	6643	9789	5202	8060	7746	1450		33345	23511.6	36972.9	39829.5	25430.2	49686	40969	45189.9	49736.4
CDS	peg.328	Q7A_331	338237	338719	483	+	Protein export cytoplasm chaperone protein (SecB, maintains protein to be exported in unfolded state)	preprotein translocase subunit SecB; AFI83189.1	26074	18275	27296	27444	18342	36033	30899	33148	33703	CDS	peg.309	313325	313807	483	+	Protein export cytoplasm chaperone protein (SecB, maintains protein to be exported in unfolded state)	CDW43_RS01460	CDW43_RS01460	protein-export chaperone SecB	protein-export chaperone SecB			8570	8568	32241	19586	30958	17317	17622	18428	4160		53983.4	37836.4	56513.5	56819.9	37975.2	74602.5	63973.1	68629.4	69778.5
CDS	peg.329	Q7A_332	338729	339763	1035	+	Glycerol-3-phosphate dehydrogenase [NAD(P)+] (EC 1.1.1.94)	glycerol-3-phosphate dehydrogenase; AFI83190.1	33391	19776	29785	34384	28268	48693	53495	56439	59322	CDS	peg.310	313817	314851	1035	+	Glycerol-3-phosphate dehydrogenase [NAD(P)+] (EC 1.1.1.94)	#N/A	CDW43_RS01465	#N/A	NAD(P)-dependent glycerol-3-phosphate dehydrogenase			12351	10544	32859	20048	32278	16724	21884	23606	3858		32261.8	19107.2	28777.8	33221.3	27312.1	47046.4	51686	54530.4	57315.9
CDS	peg.330	Q7A_333	339788	340663	876	+	FIG00857728: hypothetical protein	hypothetical protein; AFI83191.1	29604	19946	28820	33112	25589	46680	37148	37876	40572	CDS	peg.311	314876	315751	876	+	FIG00857728: hypothetical protein	CDW43_RS01470	CDW43_RS01470	hypothetical protein	hypothetical protein			10329	9471	31901	21054	33240	17463	25592	24607	4374		33794.5	22769.4	32899.5	37799.1	29211.2	53287.7	42406.4	43237.4	46315.1
CDS	peg.331	Q7A_334	340717	341880	1164	-	COG1565: Uncharacterized conserved protein	SAM-dependent methyltransferase; AFI83192.1	5044	3131	4764	5527	4642	8120	5883	5852	7528	CDS	peg.312	315805	316968	1164	-	COG1565: Uncharacterized conserved protein	CDW43_RS01475	CDW43_RS01475	SAM-dependent methyltransferase	SAM-dependent methyltransferase			2103	1839	4673	3136	4887	2679	4510	5113	809		4333.33	2689.86	4092.78	4748.28	3987.97	6975.95	5054.12	5027.49	6467.35
CDS	peg.332	Q7A_335	341897	342616	720	+	FolM Alternative dihydrofolate reductase 1	short-chain dehydrogenase; AFI83193.1	6731	4294	6397	6606	5657	9250	4182	4058	5165	CDS	peg.313	316985	317704	720	+	FolM Alternative dihydrofolate reductase 1	CDW43_RS01480	CDW43_RS01480	SDR family oxidoreductase	SDR family oxidoreductase			2645	2186	6242	5069	6675	3758	3723	3993	898		9348.61	5963.89	8884.72	9175	7856.94	12847.2	5808.33	5636.11	7173.61
CDS	peg.333	Q7A_336	343072	343425	354	-	Dihydroneopterin aldolase (EC 4.1.2.25)	dihydroneopterin aldolase; AFI83194.1	4158	2325	3862	3902	3062	5831	2998	2873	3504	CDS	peg.314	318160	318513	354	-	Dihydroneopterin aldolase (EC 4.1.2.25)	CDW43_RS01490	CDW43_RS01490	dihydroneopterin aldolase	dihydroneopterin aldolase			1245	1041	3160	2020	3451	1821	2591	2257	531		11745.8	6567.8	10909.6	11022.6	8649.72	16471.8	8468.93	8115.82	9898.31
CDS	peg.334	#N/A	343407	343535	129	-	hypothetical protein	#N/A	2399	1315	2010	1811	1601	2579	985	896	1095	CDS	peg.315	318495	318623	129	-	hypothetical protein	#N/A	#N/A	#N/A	#N/A			1121	823	1536	743	1362	809	876	855	143		18596.9	10193.8	15581.4	14038.8	12410.9	19992.2	7635.66	6945.74	8488.37
CDS	peg.335	Q7A_338	343502	344098	597	+	Acyl-phosphate:glycerol-3-phosphate O-acyltransferase PlsY	glycerol-3-phosphate acyltransferase; AFI83196.1	7386	4240	6372	5948	5603	8957	4405	4447	4593	CDS	peg.316	318665	319186	522	+	Acyl-phosphate:glycerol-3-phosphate O-acyltransferase PlsY	#N/A	CDW43_RS01495	#N/A	glycerol-3-phosphate 1-O-acyltransferase PlsY			3838	3130	4253	2283	3517	2083	3418	3283	473		12371.9	7102.18	10673.4	9963.15	9385.26	15003.4	7378.56	7448.91	7693.47
CDS	peg.336	Q7A_339	344090	345106	1017	-	TsaD/Kae1/Qri7 protein, required for threonylcarbamoyladenosine t(6)A37 formation in tRNA	tRNA (adenosine(37)-N6)-threonylcarbamoyltransferase complex transferase subunit TsaD; AFI83197.1	8612	5444	7930	7751	7370	11930	7660	7711	8541	CDS	peg.317	319178	320194	1017	-	TsaD/Kae1/Qri7 protein, required for threonylcarbamoyladenosine t(6)A37 formation in tRNA	CDW43_RS01500	CDW43_RS01500	tRNA (adenosine(37)-N6)-threonylcarbamoyltransferase complex transferase subunit TsaD	tRNA (adenosine(37)-N6)-threonylcarbamoyltransferase complex transferase subunit TsaD			4147	3383	5303	2980	4602	2689	6762	6119	1108		8468.04	5353	7797.44	7621.44	7246.8	11730.6	7531.96	7582.1	8398.23
CDS	peg.337	Q7A_340	345259	345474	216	+	SSU ribosomal protein S21p	30S ribosomal protein S21; AFI83198.1	64948	31452	53228	51855	36936	66317	64046	70751	89281	CDS	peg.318	320347	320562	216	+	SSU ribosomal protein S21p	CDW43_RS01505	CDW43_RS01505	30S ribosomal protein S21	30S ribosomal protein S21			21401	18760	49554	25993	45682	22836	60862	58207	5821		300685	145611	246426	240069	171000	307023	296509	327551	413338
CDS	peg.338	Q7A_341	345498	345959	462	+	Transamidase GatB domain protein	glutamyl-tRNA amidotransferase; AFI83199.1	79846	41573	68131	77958	58070	95767	155255	174801	209961	CDS	peg.319	320586	321047	462	+	Transamidase GatB domain protein	CDW43_RS01510	CDW43_RS01510	GatB/YqeY domain-containing protein	GatB/YqeY domain-containing protein			30777	27653	64348	33326	62080	32597	110263	108153	9313		172827	89984.8	147470	168740	125693	207288	336050	378357	454461
CDS	peg.339	Q7A_342	346028	347752	1725	+	DNA primase (EC 2.7.7.-)	DNA primase; AFI83200.1	31323	15984	29265	21673	21539	38559	59254	70313	106220	CDS	peg.320	321116	322840	1725	+	DNA primase (EC 2.7.7.-)	CDW43_RS01515	CDW43_RS01515	DNA primase	DNA primase			9566	8066	19731	9824	15714	9428	36967	43029	4215		18158.3	9266.09	16965.2	12564.1	12486.4	22353	34350.1	40761.2	61576.8
CDS	peg.340	Q7A_343	347848	349686	1839	+	RNA polymerase sigma factor RpoD	RNA polymerase sigma factor RpoD; AFI83201.1	101239	68390	95944	166586	133279	186526	473808	537599	645645	CDS	peg.321	322936	324774	1839	+	RNA polymerase sigma factor RpoD	CDW43_RS01520	CDW43_RS01520	RNA polymerase sigma factor RpoD	RNA polymerase sigma factor RpoD			48430	42574	99641	87322	121101	65199	134110	196972	23351		55051.1	37188.7	52171.8	90585.1	72473.6	101428	257644	292332	351085
CDS	peg.341	Q7A_345	349780	350925	1146	-	Integrase	integrase; AFI83202.1	72639	48587	67097	64652	79332	100411	40205	52774	50079	CDS	peg.322	324868	326013	1146	-	Integrase	CDW43_RS01530	CDW43_RS01530	site-specific integrase	site-specific integrase			38748	30329	72197	109831	125416	57202	24257	37167	18033		63384.8	42397	58548.9	56415.4	69225.1	87618.7	35082.9	46050.6	43699
CDS	peg.342	Q7A_346	351554	352252	699	+	hypothetical protein	transcriptional regulator; AFI83203.1	1555	1148	1653	1829	1609	2979	2368	2676	3809	CDS	peg.323	326606	327340	735	+	hypothetical protein	#N/A	CDW43_RS01545	#N/A	helix-turn-helix domain-containing protein			641	559	1454	2300	2436	1189	1058	1974	1894		2224.61	1642.35	2364.81	2616.6	2301.86	4261.8	3387.7	3828.33	5449.21
CDS	peg.343	Q7A_347	352422	352787	366	+	hypothetical protein	plasmid mobilization relaxosome protein MobC; AFI83204.1	1689	1098	1725	1774	1505	2330	1428	1608	2261	CDS	peg.324	327510	327875	366	+	hypothetical protein	CDW43_RS01550	CDW43_RS01550	plasmid mobilization relaxosome protein MobC	plasmid mobilization relaxosome protein MobC			693	569	1664	2149	2617	1266	689	990	427		4614.75	3000	4713.11	4846.99	4112.02	6366.12	3901.64	4393.44	6177.6
CDS	peg.344	Q7A_348	352768	354573	1806	+	MobA	hypothetical protein; AFI83205.1	3756	2299	3603	3613	2657	5435	4470	4853	7418	CDS	peg.325	327856	329661	1806	+	MobA	CDW43_RS01555	CDW43_RS01555	relaxase/mobilization nuclease domain-containing protein	relaxase/mobilization nuclease domain-containing protein			1533	1354	3973	3486	4821	2420	2695	3627	805		2079.73	1272.98	1995.02	2000.55	1471.21	3009.41	2475.08	2687.15	4107.42
CDS	peg.345	Q7A_349	354588	354935	348	-	hypothetical protein	hypothetical protein; AFI83206.1	1445	881	1526	1191	930	1973	1618	1922	2582	CDS	peg.326	329676	330023	348	-	hypothetical protein	CDW43_RS01560	CDW43_RS01560	hypothetical protein	hypothetical protein			481	432	1967	1593	1954	1071	1194	1504	309		4152.3	2531.61	4385.06	3422.41	2672.41	5669.54	4649.43	5522.99	7419.54
CDS	peg.346	Q7A_350	354995	356110	1116	-	ATP-dependent protease La (EC 3.4.21.53) Type I	peptidase; AFI83207.1	3121	1986	3191	3062	2439	4724	3698	4092	6205	CDS	peg.327	330083	331198	1116	-	ATP-dependent protease La (EC 3.4.21.53) Type I	CDW43_RS01565	#N/A	AAA family ATPase	#N/A			1234	1054	3575	3003	3759	2069	2465	3522	1016		2796.59	1779.57	2859.32	2743.73	2185.48	4232.97	3313.62	3666.67	5560.04
CDS	peg.347	Q7A_351	356144	356563	420	-	hypothetical protein	endonuclease; AFI83208.1	619	433	682	653	607	899	973	975	1455	CDS	peg.328	331232	331651	420	-	hypothetical protein	CDW43_RS01570	#N/A	LAGLIDADG family homing endonuclease	#N/A			247	239	806	872	979	518	711	1234	1099		1473.81	1030.95	1623.81	1554.76	1445.24	2140.48	2316.67	2321.43	3464.29
CDS	peg.348	Q7A_352	356732	356962	231	-	hypothetical protein	transcriptional regulator; AFI83209.1	1127	603	993	800	793	1417	892	997	1151	CDS	peg.329	331820	332050	231	-	hypothetical protein	CDW43_RS01575	CDW43_RS01575	helix-turn-helix transcriptional regulator	helix-turn-helix transcriptional regulator			367	357	1027	782	1086	546	784	936	175		4878.79	2610.39	4298.7	3463.2	3432.9	6134.2	3861.47	4316.02	4982.68
CDS	peg.349	#N/A	357184	357324	141	-	hypothetical protein	#N/A	2543	1228	1774	1190	1229	1850	650	725	654	CDS	peg.330	332272	332412	141	-	hypothetical protein	CDW43_RS16575	CDW43_RS16575	hypothetical protein	hypothetical protein			1010	759	1132	693	1106	540	495	521	123		18035.5	8709.22	12581.6	8439.72	8716.31	13120.6	4609.93	5141.84	4638.3
CDS	peg.350	#N/A	357366	357482	117	+	hypothetical protein	#N/A	2248	1006	1358	562	748	1071	715	807	777	CDS	peg.331	332454	332570	117	+	hypothetical protein	#N/A	#N/A	#N/A	#N/A			642	457	565	543	731	259	531	567	152		19213.7	8598.29	11606.8	4803.42	6393.16	9153.85	6111.11	6897.44	6641.03
CDS	peg.351	Q7A_355	357444	358574	1131	-	ABC-type multidrug transport system, permease component	hypothetical protein; AFI83212.1	8155	3540	4866	2964	4190	5547	3051	3463	3746	CDS	peg.332	332532	333662	1131	-	ABC-type multidrug transport system, permease component	CDW43_RS01585	CDW43_RS01585	ABC transporter permease	ABC transporter permease			2833	2111	3131	5657	6040	2133	1896	2263	821		7210.43	3129.97	4302.39	2620.69	3704.69	4904.51	2697.61	3061.89	3312.11
CDS	peg.352	Q7A_356	358576	361269	2694	-	ABC-type multidrug transport system, permease component	ABC transporter ATP-binding protein/permease; AFI83213.2	13325	5257	7458	2513	2480	3833	3053	3060	3742	CDS	peg.333	333664	336426	2763	-	ABC-type multidrug transport system, permease component	CDW43_RS01590	CDW43_RS01590	ribosome-associated ATPase/putative transporter RbbA	ribosome-associated ATPase/putative transporter RbbA			3685	2719	3039	1901	2532	1410	1610	1986	419		4946.18	1951.37	2768.37	932.814	920.564	1422.79	1133.26	1135.86	1389.01
CDS	peg.353	Q7A_357	361342	362421	1080	-	HlyD family secretion protein	hemolysin D; AFI83214.1	5494	2103	3049	1166	995	1571	919	1085	1056	CDS	peg.334	336430	337509	1080	-	HlyD family secretion protein	CDW43_RS01595	CDW43_RS01595	efflux RND transporter periplasmic adaptor subunit	efflux RND transporter periplasmic adaptor subunit			1746	1314	1302	882	1272	617	513	644	186		5087.04	1947.22	2823.15	1079.63	921.296	1454.63	850.926	1004.63	977.778
CDS	peg.354	Q7A_358	362436	363923	1488	-	RND efflux system, outer membrane lipoprotein CmeC	RND transporter; AFI83215.1	8986	3887	4961	2215	2058	3268	2858	3226	3947	CDS	peg.335	337524	339011	1488	-	RND efflux system, outer membrane lipoprotein CmeC	CDW43_RS01600	CDW43_RS01600	efflux transporter outer membrane subunit	efflux transporter outer membrane subunit			3485	2938	2137	1565	2250	1220	1335	2133	3016		6038.98	2612.23	3334.01	1488.58	1383.06	2196.24	1920.7	2168.01	2652.55
CDS	peg.355	Q7A_359	364402	365040	639	+	Transcriptional regulator, TetR family	TetR family transcriptional regulator; AFI83216.1	4284	2781	3875	1546	1725	3893	940	769	725	CDS	peg.336	339490	340128	639	+	Transcriptional regulator, TetR family	CDW43_RS01605	CDW43_RS01605	TetR/AcrR family transcriptional regulator	TetR/AcrR family transcriptional regulator			1804	1583	2900	1799	2408	1455	1154	1156	1349		6704.23	4352.11	6064.16	2419.41	2699.53	6092.33	1471.05	1203.44	1134.59
CDS	peg.356	#N/A	365063	365308	246	+	hypothetical protein	#N/A	2283	1369	1911	847	1042	2024	271	247	241	CDS	peg.337	340220	340396	177	+	hypothetical protein	#N/A	#N/A	#N/A	#N/A			588	558	866	509	844	549	184	209	119		9280.49	5565.04	7768.29	3443.09	4235.77	8227.64	1101.63	1004.07	979.675
CDS	peg.357	#N/A	365289	366080	792	+	putative membrane protein	#N/A	6886	3542	5652	3104	3041	6148	834	665	677	CDS	peg.338	340377	341168	792	+	putative membrane protein	#N/A	CDW43_RS01610	#N/A	DUF4105 domain-containing protein			2565	2100	4397	2281	3867	2373	642	735	246		8694.44	4472.22	7136.36	3919.19	3839.65	7762.63	1053.03	839.646	854.798
CDS	peg.358	Q7A_362	366077	368026	1950	+	hypothetical protein	hypothetical protein; AFI83219.1	10855	5555	9536	5797	5407	10117	2304	2076	1863	CDS	peg.339	341165	343114	1950	+	hypothetical protein	#N/A	CDW43_RS01615	#N/A	alpha/beta fold hydrolase			3954	3250	7981	3844	6651	4024	1775	1766	534		5566.67	2848.72	4890.26	2972.82	2772.82	5188.21	1181.54	1064.62	955.385
CDS	peg.360	Q7A_03190	368325	368477	153	-	hypothetical protein	hypothetical protein; ASF49056.1	695	401	598	224	305	677	150	131	209	CDS	peg.340	343412	343564	153	-	hypothetical protein	#N/A	#N/A	#N/A	#N/A			205	131	599	188	350	230	279	252	51		4542.48	2620.92	3908.5	1464.05	1993.46	4424.84	980.392	856.209	1366.01
CDS	peg.361	Q7A_365	369133	369882	750	+	hypothetical protein	hypothetical protein; AFI83222.1	978	741	1114	1164	988	1749	2037	2138	2487	CDS	peg.341	344220	344969	750	+	hypothetical protein	CDW43_RS01625	CDW43_RS01625	hypothetical protein	hypothetical protein			404	382	1370	1564	1791	906	1522	1773	375		1304	988	1485.33	1552	1317.33	2332	2716	2850.67	3316
CDS	peg.362	Q7A_366	370059	370907	849	-	Triosephosphate isomerase (EC 5.3.1.1)	triose-phosphate isomerase; AFI83223.1	2121	1641	1990	2022	1652	3008	1403	1355	1610	CDS	peg.342	345146	345994	849	-	Triosephosphate isomerase (EC 5.3.1.1)	CDW43_RS01630	CDW43_RS01630	triose-phosphate isomerase	triose-phosphate isomerase			865	797	1839	1583	2134	1079	1090	1376	754		2498.23	1932.86	2343.93	2381.63	1945.82	3542.99	1652.53	1596	1896.35
CDS	peg.363	Q7A_367	370952	371956	1005	-	Fructose-1,6-bisphosphatase, type I (EC 3.1.3.11)	fructose-bisphosphatase class I; AFI83224.1	2080	1587	1830	1645	1452	2049	1429	1331	1574	CDS	peg.343	346039	347043	1005	-	Fructose-1,6-bisphosphatase, type I (EC 3.1.3.11)	CDW43_RS01635	CDW43_RS01635	class 1 fructose-bisphosphatase	class 1 fructose-bisphosphatase			819	756	1345	1215	1562	808	910	1071	1626		2069.65	1579.1	1820.9	1636.82	1444.78	2038.81	1421.89	1324.38	1566.17
CDS	peg.364	Q7A_368	372037	373107	1071	-	Fructose-bisphosphate aldolase class II (EC 4.1.2.13)	fructose-1%2C6-bisphosphate aldolase; AFI83225.2	7826	6130	6283	4339	3928	5811	2487	2688	2872	CDS	peg.344	347124	348194	1071	-	Fructose-bisphosphate aldolase class II (EC 4.1.2.13)	CDW43_RS01640	CDW43_RS01640	fructose-bisphosphate aldolase class II	fructose-bisphosphate aldolase class II			3713	2918	4331	3079	4465	2419	4913	3208	12411		7307.19	5723.62	5866.48	4051.35	3667.6	5425.77	2322.13	2509.8	2681.61
CDS	peg.365	Q7A_369	373614	374135	522	-	FOG: Ankyrin repeat	hypothetical protein; AFI83226.1	3224	1987	3223	2609	2369	4475	1367	1263	1215	CDS	peg.345	348701	349222	522	-	FOG: Ankyrin repeat	CDW43_RS01645	CDW43_RS01645	ankyrin repeat domain-containing protein	ankyrin repeat domain-containing protein			708	640	2407	2140	2773	1464	1580	1621	522		6176.25	3806.51	6174.33	4998.08	4538.31	8572.8	2618.77	2419.54	2327.59
CDS	peg.366	Q7A_370	374311	374484	174	+	Pmp3 family protein	YqaE/Pmp3 family membrane protein; AFI83227.1	2842	1675	2626	1962	1821	3257	787	701	572	CDS	peg.346	349399	349572	174	+	Pmp3 family protein	CDW43_RS01650	CDW43_RS01650	YqaE/Pmp3 family membrane protein	YqaE/Pmp3 family membrane protein			730	594	2434	2332	3077	1529	1089	1109	265		16333.3	9626.44	15092	11275.9	10465.5	18718.4	4522.99	4028.74	3287.36
CDS	peg.367	Q7A_371	374578	374718	141	-	hypothetical protein	entericidin%2C EcnA/B family; AFI83228.1	1944	1295	1844	1817	1803	3248	770	686	664	CDS	peg.347	349668	349796	129	-	hypothetical protein	CDW43_RS01655	CDW43_RS01655	entericidin A/B family lipoprotein	entericidin A/B family lipoprotein			522	525	1884	2182	2552	1194	903	989	249		13787.2	9184.4	13078	12886.5	12787.2	23035.5	5460.99	4865.25	4709.22
CDS	peg.369	#N/A	375254	375634	381	+	hypothetical protein	#N/A	2364	1623	2287	2457	2284	3725	1907	1882	2057	CDS	peg.348	350254	350613	360	+	hypothetical protein	CDW43_RS01660	CDW43_RS01660	iron dicitrate transport regulator FecR	iron dicitrate transport regulator FecR			732	564	1563	1601	1937	1021	1398	1794	378		6204.72	4259.84	6002.62	6448.82	5994.75	9776.9	5005.25	4939.63	5398.95
CDS	peg.370	Q7A_374	375631	376200	570	+	outer membrane protein	OmpA family protein; AFI83231.1	2796	1852	2684	3092	3027	4714	2687	2825	2482	CDS	peg.350	350832	351281	450	+	Outer membrane protein A precursor	#N/A	CDW43_RS16590	#N/A	OmpA family protein			616	537	1552	1628	2196	1001	1434	1591	406		4905.26	3249.12	4708.77	5424.56	5310.53	8270.18	4714.04	4956.14	4354.39
CDS	peg.371	Q7A_375	376216	377562	1347	+	Type I secretion system, outer membrane component LapE	type I secretion protein TolC; AFI83232.1	18316	13437	17944	24434	24110	33332	8304	8817	7694	CDS	peg.351	351297	352643	1347	+	Type I secretion system, outer membrane component LapE	CDW43_RS01670	CDW43_RS01670	TolC family outer membrane protein	TolC family outer membrane protein			3601	2918	7486	9225	12035	5769	4370	5089	1602		13597.6	9975.5	13321.5	18139.6	17899	24745.4	6164.81	6545.66	5711.95
CDS	peg.372	Q7A_376	377690	379743	2054	-	Anaerobic dehydrogenases, typically selenocysteine-containing	molybdopterin oxidoreductase;pseudo=true	5578	3868	5356	7220	6642	10312	4649	4568	5246	CDS	peg.352	352781	354792	2012	-	Anaerobic dehydrogenases, typically selenocysteine-containing	CDW43_RS16595	#N/A	hypothetical protein	#N/A			2013	1501	3748	3762	5004	2675	3688	4434	989		2715.68	1883.15	2607.59	3515.09	3233.69	5020.45	2263.39	2223.95	2554.04
CDS	peg.373	Q7A_380	380125	380619	495	+	Thiol peroxidase, Tpx-type (EC 1.11.1.15)	2-Cys peroxiredoxin; AFI83233.1	7590	4867	7187	5424	4796	10747	2587	2343	2330	CDS	peg.353	355174	355668	495	+	Thiol peroxidase, Tpx-type (EC 1.11.1.15)	CDW43_RS01680	CDW43_RS01680	thiol peroxidase	thiol peroxidase			3267	3041	12504	11982	15200	7695	3701	4152	2214		15333.3	9832.32	14519.2	10957.6	9688.89	21711.1	5226.26	4733.33	4707.07
CDS	peg.374	Q7A_381	380788	381435	648	+	hypothetical protein	hypothetical protein; AFI83234.1	9747	8234	10601	15084	16524	24422	9190	10146	10001	CDS	peg.354	355836	356483	648	+	hypothetical protein	CDW43_RS01685	CDW43_RS01685	hypothetical protein	hypothetical protein			5170	4332	13044	13582	17384	8624	5711	6923	1936		15041.7	12706.8	16359.6	23277.8	25500	37688.3	14182.1	15657.4	15433.6
CDS	peg.375	Q7A_382	381559	382023	465	+	Isoquinoline 1-oxidoreductase alpha subunit (EC 1.3.99.16)	(2Fe-2S)-binding protein; AFI83235.1	2299	1253	1967	1395	1453	2481	881	738	770	CDS	peg.355	356623	357087	465	+	Isoquinoline 1-oxidoreductase alpha subunit (EC 1.3.99.16)	CDW43_RS01690	CDW43_RS01690	(2Fe-2S)-binding protein	(2Fe-2S)-binding protein			2038	1778	6629	5325	7658	4133	3121	3428	980		4944.09	2694.62	4230.11	3000	3124.73	5335.48	1894.62	1587.1	1655.91
CDS	peg.376	Q7A_383	382020	384338	2319	+	Isoquinoline 1-oxidoreductase beta subunit (EC 1.3.99.16)	twin-arginine translocation pathway signal protein; AFI83236.1	13301	8123	11392	12894	11728	17952	8649	8348	8319	CDS	peg.356	357084	359402	2319	+	Isoquinoline 1-oxidoreductase beta subunit (EC 1.3.99.16)	CDW43_RS01695	CDW43_RS01695	xanthine dehydrogenase family protein molybdopterin-binding subunit	xanthine dehydrogenase family protein molybdopterin-binding subunit			9256	8025	26192	19526	29154	15058	15539	15502	3424		5735.66	3502.8	4912.46	5560.16	5057.35	7741.27	3729.62	3599.83	3587.32
CDS	peg.377	Q7A_384	384341	385336	996	+	Xanthine and CO dehydrogenases maturation factor, XdhC/CoxF family	hypothetical protein; AFI83237.1	3824	2215	3072	3392	3118	5349	2400	2577	2780	CDS	peg.357	359405	360400	996	+	Xanthine and CO dehydrogenases maturation factor, XdhC/CoxF family	CDW43_RS01700	CDW43_RS01700	XdhC family protein	XdhC family protein			3208	2511	7253	5483	8190	4032	5176	5021	879		3839.36	2223.9	3084.34	3405.62	3130.52	5370.48	2409.64	2587.35	2791.16
CDS	peg.378	Q7A_385	385349	385963	615	+	CTP:molybdopterin cytidylyltransferase	nucleotidyltransferase family protein; AFI83238.2	2140	1367	2023	1529	1343	2915	912	820	966	CDS	peg.358	360413	361027	615	+	CTP:molybdopterin cytidylyltransferase	CDW43_RS01705	CDW43_RS01705	NTP transferase domain-containing protein	NTP transferase domain-containing protein			1235	1008	3619	2096	3168	1934	2460	2232	271		3479.67	2222.76	3289.43	2486.18	2183.74	4739.84	1482.93	1333.33	1570.73
CDS	peg.379	Q7A_386	385960	386691	732	-	cAMP-binding proteins - catabolite gene activator and regulatory subunit of cAMP-dependent protein kinases	cyclic nucleotide-binding protein; ASF49183.1	2745	2059	3158	1514	1391	3284	1624	1343	1360	CDS	peg.359	361024	361755	732	-	cAMP-binding proteins - catabolite gene activator and regulatory subunit of cAMP-dependent protein kinases	CDW43_RS01710	CDW43_RS01710	Crp/Fnr family transcriptional regulator	Crp/Fnr family transcriptional regulator			1264	1151	3554	1776	2653	1855	4286	4517	465		3750	2812.84	4314.21	2068.31	1900.27	4486.34	2218.58	1834.7	1857.92
CDS	peg.380	Q7A_388	386970	387134	165	-	Protein of unknown function DUF1328	DUF1328 domain-containing protein; AFI83239.1	1227	796	860	951	869	1314	664	701	666	CDS	peg.360	362034	362198	165	-	Protein of unknown function DUF1328	CDW43_RS01715	CDW43_RS01715	DUF1328 domain-containing protein	DUF1328 domain-containing protein			515	473	1438	4869	5240	1824	838	751	237		7436.36	4824.24	5212.12	5763.64	5266.67	7963.64	4024.24	4248.48	4036.36
CDS	peg.381	Q7A_389	387328	387513	186	+	hypothetical protein	hypothetical protein; AFI83240.1	3625	2536	3088	3168	2818	5603	5402	6123	5005	CDS	peg.361	362391	362576	186	+	hypothetical protein	CDW43_RS01720	CDW43_RS01720	hypothetical protein	hypothetical protein			1353	1129	5566	10540	10337	4005	4594	5231	1862		19489.2	13634.4	16602.2	17032.3	15150.5	30123.7	29043	32919.4	26908.6
CDS	peg.382	Q7A_390	387595	387867	273	+	hypothetical protein	hypothetical protein; AFI83241.1	8804	6428	7526	8735	8539	14895	9557	10146	8859	CDS	peg.362	362658	362930	273	+	hypothetical protein	CDW43_RS01725	CDW43_RS01725	DUF883 family protein	DUF883 family protein			3634	3166	11889	25199	24703	8805	7980	9683	3431		32249.1	23545.8	27567.8	31996.3	31278.4	54560.4	35007.3	37164.8	32450.5
CDS	peg.383	Q7A_391	387907	388341	435	+	hypothetical protein	phage holin family protein; AFI83242.1	18363	14238	17462	23456	21582	35153	9528	9969	9254	CDS	peg.363	362970	363404	435	+	hypothetical protein	CDW43_RS01730	CDW43_RS01730	phage holin family protein	phage holin family protein			10559	8209	23357	43289	45980	19855	7923	9245	2625		42213.8	32731	40142.5	53921.8	49613.8	80811.5	21903.4	22917.2	21273.6
CDS	peg.384	Q7A_392	388418	388774	357	+	hypothetical protein	hypothetical protein; AFI83243.1	8580	5593	7925	11387	10217	16494	8708	7924	7954	CDS	peg.364	363481	363837	357	+	hypothetical protein	CDW43_RS01735	CDW43_RS01735	hypothetical protein	hypothetical protein			4717	3674	12648	18524	20190	8344	5842	7076	1664		24033.6	15666.7	22198.9	31896.4	28619	46201.7	24392.2	22196.1	22280.1
CDS	peg.385	Q7A_393	388817	389008	192	+	hypothetical protein	hypothetical protein; AFI83244.1	6089	3969	5729	8728	8471	12465	4200	3961	4775	CDS	peg.365	363880	364071	192	+	hypothetical protein	CDW43_RS01740	CDW43_RS01740	YjfB family protein	YjfB family protein			4502	3418	9677	13684	15183	7349	5610	5264	1763		31713.5	20671.9	29838.5	45458.3	44119.8	64921.9	21875	20630.2	24869.8
CDS	peg.386	Q7A_394	389133	390521	1389	+	sodium-solute symporter, putative	twin-arginine translocation pathway signal protein; AFI83245.1	13711	8738	12880	8018	8717	15538	5429	4783	5275	CDS	peg.366	364196	365584	1389	+	sodium-solute symporter, putative	CDW43_RS01745	CDW43_RS01745	sodium:solute symporter family protein	sodium:solute symporter family protein			6100	5050	16316	13982	18980	10077	5530	5360	1733		9871.13	6290.86	9272.86	5772.5	6275.74	11186.5	3908.57	3443.48	3797.7
CDS	peg.387	Q7A_395	390547	390807	261	+	hypothetical protein	hypothetical protein; AFI83246.1	6313	4076	5723	4441	4987	7795	1767	1813	1932	CDS	peg.367	365610	365870	261	+	hypothetical protein	CDW43_RS01750	CDW43_RS01750	hypothetical protein	hypothetical protein			2213	1824	6085	7932	9983	4932	1342	1456	560		24187.7	15616.9	21927.2	17015.3	19107.3	29865.9	6770.11	6946.36	7402.3
CDS	peg.388	Q7A_396	390840	391160	321	+	hypothetical protein	hypothetical protein; AFI83247.2	5007	3251	4517	3657	3479	5750	2008	1980	2109	CDS	peg.368	365903	366223	321	+	hypothetical protein	CDW43_RS01755	CDW43_RS01755	hypothetical protein	hypothetical protein			2505	2054	5595	6881	8994	5011	2800	2976	890		15598.1	10127.7	14071.7	11392.5	10838	17912.8	6255.45	6168.22	6570.09
CDS	peg.389	Q7A_397	391231	392526	1296	+	Heavy metal RND efflux outer membrane protein, CzcC family	TolC family protein; AFI83248.1	3436	1715	3417	1747	1827	4026	4118	3704	3481	CDS	peg.369	366375	367589	1215	+	Heavy metal RND efflux outer membrane protein, CzcC family	#N/A	CDW43_RS01760	#N/A	TolC family protein			1828	1774	2858	1739	2926	1731	6374	6258	1392		2651.23	1323.3	2636.57	1347.99	1409.72	3106.48	3177.47	2858.02	2685.96
CDS	peg.390	Q7A_398	392531	393757	1227	+	Probable Co/Zn/Cd efflux system membrane fusion protein	acetyl-CoA carboxylase biotin carboxyl carrier protein subunit; AFI83249.1	3274	1759	3266	1622	1520	3720	2851	2480	2553	CDS	peg.370	367594	368820	1227	+	Probable Co/Zn/Cd efflux system membrane fusion protein	CDW43_RS01765	CDW43_RS01765	efflux RND transporter periplasmic adaptor subunit	efflux RND transporter periplasmic adaptor subunit			1833	1609	3576	1780	3081	1925	4369	4048	914		2668.3	1433.58	2661.78	1321.92	1238.79	3031.78	2323.55	2021.19	2080.68
CDS	peg.391	Q7A_399	393767	396889	3123	+	Cobalt-zinc-cadmium resistance protein CzcA Cation efflux system protein CusA	CusA/CzcA family heavy metal efflux RND transporter; AFI83250.1	15325	6849	12484	8849	9560	16781	9511	7881	7790	CDS	peg.371	368830	371952	3123	+	Cobalt-zinc-cadmium resistance protein CzcA Cation efflux system protein CusA	CDW43_RS01770	CDW43_RS01770	CusA/CzcA family heavy metal efflux RND transporter	CusA/CzcA family heavy metal efflux RND transporter			8521	6543	12057	8498	12788	6721	9301	9569	1597		4907.14	2193.08	3997.44	2833.49	3061.16	5373.36	3045.47	2523.54	2494.4
CDS	peg.392	Q7A_400	396967	397344	378	-	hypothetical protein	hypothetical protein; AFI83251.1	952	530	824	502	580	899	632	591	547	CDS	peg.372	372030	372407	378	-	hypothetical protein	CDW43_RS01775	CDW43_RS01775	DUF4168 domain-containing protein	DUF4168 domain-containing protein			413	302	501	395	565	313	702	928	126		2518.52	1402.12	2179.89	1328.04	1534.39	2378.31	1671.96	1563.49	1447.09
CDS	peg.393	Q7A_401	397550	399010	1461	+	Two-component sensor histidine kinase	two-component sensor histidine kinase; AFI83252.1	4473	2327	3872	3310	2650	5125	1828	1661	1748	CDS	peg.373	372613	374073	1461	+	Serine/Threonine protein kinase and Signal Transduction Histidine Kinase (STHK) with GAF and PAS/PAC sensor	CDW43_RS01780	CDW43_RS01780	HAMP domain-containing histidine kinase	HAMP domain-containing histidine kinase			1513	1297	3970	3631	5276	2583	1589	1660	752		3061.6	1592.74	2650.24	2265.57	1813.83	3507.87	1251.2	1136.89	1196.44
CDS	peg.394	Q7A_402	399007	400434	1428	+	Response regulatory protein	sigma-54-dependent Fis family transcriptional regulator; AFI83253.1	4170	2615	3868	2728	2928	5275	3118	2580	2876	CDS	peg.374	374070	375497	1428	+	Response regulatory protein	CDW43_RS01785	CDW43_RS01785	sigma-54 dependent transcriptional regulator	sigma-54 dependent transcriptional regulator			2280	1858	4220	4041	5461	2894	2419	2793	571		2920.17	1831.23	2708.68	1910.36	2050.42	3693.98	2183.47	1806.72	2014.01
CDS	peg.395	Q7A_403	400431	401564	1134	-	hypothetical protein	hypothetical protein; AFI83254.1	5465	2823	4549	2711	2738	5742	2125	1946	2135	CDS	peg.375	375494	376537	1044	-	hypothetical protein	CDW43_RS01790	#N/A	WG repeat-containing protein	#N/A			983	808	2264	2150	2562	1522	1271	1357	371		4819.22	2489.42	4011.46	2390.65	2414.46	5063.49	1873.9	1716.05	1882.72
CDS	peg.396	Q7A_404	401841	403196	1356	-	Glutathione reductase (EC 1.8.1.7)	glutathione-disulfide reductase; AFI83255.1	35128	22123	34252	12072	13589	31175	2483	1846	2063	CDS	peg.376	377159	378514	1356	-	Glutathione reductase (EC 1.8.1.7)	CDW43_RS01800	CDW43_RS01800	glutathione-disulfide reductase	glutathione-disulfide reductase			5536	4839	14056	5082	8557	5368	4373	2977	1852		25905.6	16314.9	25259.6	8902.65	10021.4	22990.4	1831.12	1361.36	1521.39
CDS	peg.397	Q7A_405	403284	403808	525	-	Peroxiredoxin family protein/glutaredoxin	peroxiredoxin; AFI83256.1	34471	21886	32667	13779	15284	37163	3058	2614	2281	CDS	peg.377	378602	379126	525	-	Peroxiredoxin family protein/glutaredoxin	CDW43_RS01805	CDW43_RS01805	peroxiredoxin	peroxiredoxin			5789	5317	15404	4542	8474	5225	6969	5012	8063		65659	41687.6	62222.9	26245.7	29112.4	70786.7	5824.76	4979.05	4344.76
CDS	peg.398	Q7A_406	403931	406129	2199	-	diguanylate cyclase/phosphodiesterase (GGDEF & EAL domains) with PAS/PAC sensor(s)	diguanylate cyclase; AFI83257.2	36631	25121	37692	32498	27434	53608	13648	13853	15749	CDS	peg.378	379249	381448	2200	-	diguanylate cyclase/phosphodiesterase (GGDEF & EAL domains) with PAS/PAC sensor(s)	CDW43_RS01810	CDW43_RS16620	EAL domain-containing protein	response regulator			7806	6439	22228	15533	22232	12511	8626	9262	2180		16658	11423.8	17140.5	14778.5	12475.7	24378.4	6206.46	6299.68	7161.89
CDS	peg.399	Q7A_407	406141	409104	2964	-	Two-component hybrid sensor and regulator	hybrid sensor histidine kinase/response regulator; AFI83258.1	17606	12287	18664	16572	14101	28164	8082	7428	7784	CDS	peg.380	381460	384423	2964	-	Two-component hybrid sensor and regulator	CDW43_RS01815	CDW43_RS01815	PAS domain S-box protein	PAS domain S-box protein			5598	4671	17890	13632	18590	10472	10532	10288	2591		5939.95	4145.41	6296.9	5591.09	4757.42	9502.02	2726.72	2506.07	2626.18
CDS	peg.400	Q7A_408	409255	409815	561	-	5-formyltetrahydrofolate cyclo-ligase (EC 6.3.3.2)	5-formyltetrahydrofolate cyclo-ligase; AFI83259.1	6394	4475	6133	6803	6116	10475	5286	5081	5961	CDS	peg.381	384574	385134	561	-	5-formyltetrahydrofolate cyclo-ligase (EC 6.3.3.2)	CDW43_RS01820	CDW43_RS01820	5-formyltetrahydrofolate cyclo-ligase	5-formyltetrahydrofolate cyclo-ligase			1650	1575	5265	5288	6983	3946	3843	4089	872		11397.5	7976.83	10932.3	12126.6	10902	18672	9422.46	9057.04	10625.7
CDS	peg.401	Q7A_409	409812	410252	441	-	Nitrite-sensitive transcriptional repressor NsrR	Rrf2 family transcriptional regulator; AFI83260.1	5537	4258	5492	5365	4797	9482	2540	2371	3133	CDS	peg.382	385131	385463	333	-	Nitrite-sensitive transcriptional repressor NsrR	CDW43_RS01825	#N/A	Rrf2 family transcriptional regulator	#N/A			1375	1324	4714	4692	7000	3349	1965	2281	404		12555.6	9655.33	12453.5	12165.5	10877.6	21501.1	5759.64	5376.42	7104.31
CDS	peg.402	Q7A_410	410339	411571	1233	+	Flavohemoprotein (Hemoglobin-like protein) (Flavohemoglobin) (Nitric oxide dioxygenase) (EC 1.14.12.17)	nitric oxide dioxygenase; AFI83261.1	5315	3480	5208	9210	7227	10792	8034	8437	8245	CDS	peg.384	385821	386889	1069	+	Flavohemoprotein (Hemoglobin-like protein) (Flavohemoglobin) (Nitric oxide dioxygenase) (EC 1.14.12.17)	#N/A	CDW43_RS01835	#N/A	FAD-binding oxidoreductase			2883	2292	7179	5760	8147	4689	7041	7813	1456		4310.62	2822.38	4223.84	7469.59	5861.31	8752.64	6515.82	6842.66	6686.94
CDS	peg.403	Q7A_411	411756	412073	318	+	hypothetical protein	peptidase M4; AFI83262.1	1691	1007	1633	1919	1744	2899	4672	5621	6708	CDS	peg.385	387074	387391	318	+	hypothetical protein	CDW43_RS01840	CDW43_RS01840	PepSY domain-containing protein	PepSY domain-containing protein			2014	1243	1953	2004	3035	1277	3475	5838	2995		5317.61	3166.67	5135.22	6034.59	5484.28	9116.35	14691.8	17676.1	21094.3
CDS	peg.404	Q7A_412	412383	413708	1326	-	Sensor protein PhoQ (EC 2.7.13.3)	ATP-binding protein; AFI83263.1	6620	4389	6932	8956	6790	13012	4783	4546	5316	CDS	peg.386	387701	389026	1326	-	Sensor protein PhoQ (EC 2.7.13.3)	CDW43_RS01845	CDW43_RS01845	ATP-binding protein	ATP-binding protein			2760	2491	7187	5409	8037	4647	5438	6162	1482		4992.46	3309.95	5227.75	6754.15	5120.66	9812.97	3607.09	3428.36	4009.05
CDS	peg.405	Q7A_413	413705	414367	663	-	DNA-binding response regulator	DNA-binding response regulator; AFI83264.1	5383	3250	4405	7019	7242	10678	5970	5567	5942	CDS	peg.387	389023	389685	663	-	DNA-binding response regulator	CDW43_RS01850	CDW43_RS01850	response regulator transcription factor	response regulator transcription factor			3088	2451	5097	5597	7142	3189	4548	5882	1798		8119.16	4901.96	6644.04	10586.7	10923.1	16105.6	9004.52	8396.68	8962.29
CDS	peg.406	Q7A_414	414370	414690	321	-	lipoprotein, putative	peptidase; AFI83265.1	2319	1685	2239	3321	3219	5295	3775	3311	3677	CDS	peg.388	389688	390008	321	-	lipoprotein, putative	CDW43_RS01855	CDW43_RS01855	PepSY domain-containing protein	PepSY domain-containing protein			1130	1050	2719	3295	4137	1943	2469	3049	963		7224.3	5249.22	6975.08	10345.8	10028	16495.3	11760.1	10314.6	11454.8
CDS	peg.407	Q7A_415	415270	416307	1038	+	Cyclopropane-fatty-acyl-phospholipid synthase (EC 2.1.1.79)	cyclopropane-fatty-acyl-phospholipid synthase;pseudo=true	8144	5763	8021	11010	11300	15972	3435	3837	3244	CDS	peg.389	390445	391626	1182	+	Cyclopropane-fatty-acyl-phospholipid synthase (EC 2.1.1.79)	CDW43_RS01860	CDW43_RS01860	cyclopropane fatty acyl phospholipid synthase	cyclopropane fatty acyl phospholipid synthase			3619	3157	8161	14644	15844	7027	2492	3428	1792		7845.86	5552.02	7727.36	10606.9	10886.3	15387.3	3309.25	3696.53	3125.24
CDS	peg.408	Q7A_416	416447	417904	1458	+	Catalase (EC 1.11.1.6)	catalase; AFI83267.1	48057	34045	47165	41353	54357	83432	28198	31289	44479	CDS	peg.390	391766	393223	1458	+	Catalase (EC 1.11.1.6)	CDW43_RS01865	CDW43_RS01865	catalase	catalase			18003	15410	54071	53366	69726	32791	17419	28344	14600		32960.9	23350.5	32349.1	28362.8	37281.9	57223.6	19340.2	21460.2	30506.9
CDS	peg.409	Q7A_417	417970	418440	471	+	Non-specific DNA-binding protein Dps / Iron-binding ferritin-like antioxidant protein / Ferroxidase (EC 1.16.3.1)	DNA starvation/stationary phase protection protein; AFI83268.1	48553	31329	39771	36628	48149	77600	37300	42405	53658	CDS	peg.391	393289	393759	471	+	Non-specific DNA-binding protein Dps / Iron-binding ferritin-like antioxidant protein / Ferroxidase (EC 1.16.3.1)	CDW43_RS01870	CDW43_RS01870	DNA starvation/stationary phase protection protein	DNA starvation/stationary phase protection protein			21591	16837	53022	74551	91822	36880	16363	35787	14302		103085	66515.9	84439.5	77766.5	102227	164756	79193.2	90031.8	113924
CDS	peg.410	Q7A_418	418852	420303	1452	-	Aldehyde dehydrogenase (EC 1.2.1.3)	aldehyde dehydrogenase; AFI83269.1	21600	15244	21262	22061	17924	32050	10585	10522	11411	CDS	peg.392	394171	395622	1452	-	Aldehyde dehydrogenase (EC 1.2.1.3)	CDW43_RS01875	CDW43_RS01875	aldehyde dehydrogenase family protein	aldehyde dehydrogenase family protein			8632	7744	25105	17832	27490	15270	6995	7022	2451		14876	10498.6	14643.3	15193.5	12344.4	22073	7289.94	7246.56	7858.82
CDS	peg.411	Q7A_419	420313	421953	1641	-	Acetolactate synthase large subunit (EC 2.2.1.6)	acetolactate synthase large subunit; AFI83270.1	18374	13137	18973	18194	15195	28631	6578	5949	5911	CDS	peg.393	395632	397272	1641	-	Acetolactate synthase large subunit (EC 2.2.1.6)	CDW43_RS01880	CDW43_RS01880	acetolactate synthase large subunit	acetolactate synthase large subunit			7287	6266	24400	18458	25607	14259	6182	6463	2300		11196.8	8005.48	11561.9	11087.1	9259.6	17447.3	4008.53	3625.23	3602.07
CDS	peg.412	Q7A_420	422040	422921	882	-	Flagellar motor rotation protein MotB	flagellar motor protein MotB; AFI83271.1	2818	1778	2816	3250	2334	4593	1535	1233	1278	CDS	peg.394	397359	398240	882	-	Flagellar motor rotation protein MotB	CDW43_RS01885	CDW43_RS01885	OmpA family protein	OmpA family protein			1352	1169	5785	3936	5923	3165	1768	1755	414		3195.01	2015.87	3192.74	3684.81	2646.26	5207.48	1740.36	1397.96	1448.98
CDS	peg.413	#N/A	422875	423012	138	-	hypothetical protein	#N/A	301	171	317	345	216	513	267	223	213	CDS	peg.395	398194	398331	138	-	hypothetical protein	#N/A	#N/A	#N/A	#N/A			169	136	688	462	687	356	280	263	55		2181.16	1239.13	2297.1	2500	1565.22	3717.39	1934.78	1615.94	1543.48
CDS	peg.414	Q7A_422	423096	426050	2955	+	diguanylate cyclase/phosphodiesterase (GGDEF & EAL domains) with PAS/PAC sensor(s)	bifunctional diguanylate cyclase/phosphodiesterase; AFI83273.1	11623	7180	12239	12689	9306	18663	6226	5625	5833	CDS	peg.396	398415	401369	2955	+	diguanylate cyclase/phosphodiesterase (GGDEF & EAL domains) with PAS/PAC sensor(s)	CDW43_RS01890	CDW43_RS01890	EAL domain-containing protein	EAL domain-containing protein			4468	3743	14011	10225	15319	8231	6070	6295	1520		3933.33	2429.78	4141.79	4294.08	3149.24	6315.74	2106.94	1903.55	1973.94
CDS	peg.415	Q7A_423	426481	427791	1311	+	sodium-dependent transporter	sodium-dependent transporter; AFI83274.1	6655	4037	6360	6839	6224	10451	4593	3903	4322	CDS	peg.397	401800	403110	1311	+	sodium-dependent transporter	CDW43_RS01895	CDW43_RS01895	sodium-dependent transporter	sodium-dependent transporter			2390	2016	6487	5415	7277	3808	3777	3872	963		5076.28	3079.33	4851.26	5216.63	4747.52	7971.78	3503.43	2977.12	3296.72
CDS	peg.416	#N/A	427788	427928	141	+	hypothetical protein	#N/A	1129	685	1026	1158	959	1733	339	246	241	CDS	peg.398	403107	403247	141	+	hypothetical protein	#N/A	#N/A	#N/A	#N/A			389	316	1079	933	1297	696	274	290	85		8007.09	4858.16	7276.6	8212.77	6801.42	12290.8	2404.26	1744.68	1709.22
CDS	peg.417	Q7A_425	427921	430038	2118	+	Phospholipase D/Transphosphatidylase	hypothetical protein; AFI83276.1	9726	5866	9136	10781	8510	15644	3321	2744	2893	CDS	peg.399	403240	405357	2118	+	Phospholipase D/Transphosphatidylase	CDW43_RS01900	CDW43_RS01900	VTT domain-containing protein	VTT domain-containing protein			3583	2763	9130	9119	12404	6291	3139	2610	878		4592.07	2769.59	4313.5	5090.18	4017.94	7386.21	1567.99	1295.56	1365.91
CDS	peg.418	Q7A_426	430008	430742	735	+	Endonuclease/exonuclease/phosphatase	endonuclease; AFI83277.1	3084	1929	2866	2938	2593	4465	807	838	787	CDS	peg.400	405327	406061	735	+	Endonuclease/exonuclease/phosphatase	CDW43_RS01905	CDW43_RS01905	endonuclease/exonuclease/phosphatase family protein	endonuclease/exonuclease/phosphatase family protein			1107	864	2542	2264	3139	1690	997	884	177		4195.92	2624.49	3899.32	3997.28	3527.89	6074.83	1097.96	1140.14	1070.75
CDS	peg.419	#N/A	430806	430964	159	+	hypothetical protein	#N/A	554	402	591	510	367	852	223	202	319	CDS	peg.401	406125	406283	159	+	hypothetical protein	#N/A	#N/A	#N/A	#N/A			150	140	484	369	484	295	311	293	57		3484.28	2528.3	3716.98	3207.55	2308.18	5358.49	1402.52	1270.44	2006.29
CDS	peg.420	Q7A_428	430980	433934	2955	+	putative exported protein	hypothetical protein; AFI83279.1	23662	15588	22908	21044	17198	34171	7871	7420	7195	CDS	peg.402	406299	409253	2955	+	putative exported protein	CDW43_RS01910	CDW43_RS01910	DUF748 domain-containing protein	DUF748 domain-containing protein			7782	6758	24313	17590	24570	14098	6519	6472	1621		8007.45	5275.13	7752.28	7121.49	5819.97	11563.8	2663.62	2511	2434.86
CDS	peg.421	#N/A	434452	434571	120	+	hypothetical protein	#N/A	1432	930	1352	698	588	1567	1105	1141	1078	CDS	peg.403	409768	409890	123	+	hypothetical protein	#N/A	#N/A	#N/A	#N/A			475	355	1440	845	1079	670	1973	1857	249		11933.3	7750	11266.7	5816.67	4900	13058.3	9208.33	9508.33	8983.33
CDS	peg.422	Q7A_430	434694	434879	186	+	Mobile element protein	hypothetical protein; AFI83281.1	1952	1391	2167	2073	1741	3208	1438	1800	1410	CDS	peg.404	410013	410198	186	+	Mobile element protein	#N/A	#N/A	#N/A	#N/A			866	785	3464	2544	3509	1952	2394	2342	392		10494.6	7478.49	11650.5	11145.2	9360.22	17247.3	7731.18	9677.42	7580.65
CDS	peg.423	Q7A_431	434848	435621	774	-	Nitric oxide reductase activation protein NorQ	CbbQ/NirQ/NorQ/GpvN family protein; AFI83282.1	6643	4973	7663	8422	5850	10696	5854	7197	6089	CDS	peg.405	410167	410940	774	-	Nitric oxide reductase activation protein NorQ	CDW43_RS01925	CDW43_RS01925	CbbQ/NirQ/NorQ/GpvN family protein	CbbQ/NirQ/NorQ/GpvN family protein			2327	2046	12400	8511	12183	7538	9010	9196	1652		8582.69	6425.06	9900.52	10881.1	7558.14	13819.1	7563.31	9298.45	7866.93
CDS	peg.424	Q7A_432	435640	437511	1872	-	Nitric oxide reductase activation protein NorD	nitric oxide reductase activation protein NorD; AFI83283.1	13640	9521	15118	18293	13296	22521	19344	23479	21961	CDS	peg.406	410959	412830	1872	-	Nitric oxide reductase activation protein NorD	CDW43_RS01930	CDW43_RS01930	VWA domain-containing protein	VWA domain-containing protein			5641	4686	20596	16142	22096	13446	25498	26163	4965		7286.32	5086	8075.85	9771.9	7102.56	12030.4	10333.3	12542.2	11731.3
CDS	peg.425	Q7A_433	437532	438944	1413	-	Nitric-oxide reductase subunit B (EC 1.7.99.7)	nitric-oxide reductase large subunit; AFI83284.1	26104	17225	27690	36298	25393	36869	78338	101534	86171	CDS	peg.407	412851	414263	1413	-	Nitric-oxide reductase subunit B (EC 1.7.99.7)	CDW43_RS01935	CDW43_RS01935	cbb3-type cytochrome c oxidase subunit I	cbb3-type cytochrome c oxidase subunit I			11994	9703	40327	32370	45336	25607	61668	75199	33567		18474.2	12190.4	19596.6	25688.6	17971	26092.7	55440.9	71857	60984.4
CDS	peg.426	Q7A_434	438961	439410	450	-	Nitric-oxide reductase subunit C (EC 1.7.99.7)	cytochrome C; AFI83285.1	5882	3574	5867	7319	5071	7508	29169	34921	31751	CDS	peg.408	414280	414729	450	-	Nitric-oxide reductase subunit C (EC 1.7.99.7)	CDW43_RS01940	CDW43_RS01940	cytochrome c	cytochrome c			2485	2101	9455	10242	12018	6218	21683	28107	23089		13071.1	7942.22	13037.8	16264.4	11268.9	16684.4	64820	77602.2	70557.8
CDS	peg.427	Q7A_435	439695	441251	1557	+	Functional role page for Anaerobic nitric oxide reductase transcription regulator NorR	nitric oxide reductase transcription regulator; AFI83286.1	11054	7484	9764	14031	13449	18673	30814	36098	32053	CDS	peg.409	415014	416570	1557	+	Functional role page for Anaerobic nitric oxide reductase transcription regulator NorR	CDW43_RS01945	CDW43_RS01945	nitric oxide reductase transcriptional regulator NorR	nitric oxide reductase transcriptional regulator NorR			4117	3452	8218	9290	12438	6278	14552	26934	8008		7099.55	4806.68	6271.03	9011.56	8637.76	11992.9	19790.6	23184.3	20586.4
CDS	peg.428	Q7A_436	441280	441855	576	+	Nitric oxide reductase activation protein NorE	hypothetical protein; AFI83287.1	4829	2935	4085	4802	4485	7312	10858	12194	11538	CDS	peg.410	416599	417174	576	+	Nitric oxide reductase activation protein NorE	CDW43_RS01950	CDW43_RS01950	cytochrome c oxidase subunit 3	cytochrome c oxidase subunit 3			1551	1318	4368	2918	4318	2339	10345	14406	4124		8383.68	5095.49	7092.01	8336.81	7786.46	12694.4	18850.7	21170.1	20031.2
CDS	peg.429	Q7A_437	441877	442104	228	+	hypothetical protein	hypothetical protein; AFI83288.1	2652	1798	2743	3023	2405	4400	4756	5975	5874	CDS	peg.411	417196	417423	228	+	hypothetical protein	#N/A	#N/A	#N/A	#N/A			854	733	2871	2032	2762	1600	5405	6614	1501		11631.6	7885.96	12030.7	13258.8	10548.2	19298.2	20859.6	26206.1	25763.2
CDS	peg.430	Q7A_438	442223	443443	1221	-	NnrS protein involved in response to NO	NnrS family protein; AFI83289.1	17394	10532	16480	19127	14579	25077	25074	27868	29444	CDS	peg.412	417542	418762	1221	-	NnrS protein involved in response to NO	CDW43_RS01960	CDW43_RS01960	NnrS family protein	NnrS family protein			7137	5907	18211	14495	21096	11804	24093	25805	4509		14245.7	8625.72	13497.1	15665	11940.2	20538.1	20535.6	22823.9	24114.7
CDS	peg.431	Q7A_439	443937	444944	1008	-	Molybdenum cofactor biosynthesis protein MoaA	GTP 3'%2C8-cyclase MoaA; AFI83290.1	9116	6137	9151	9135	10541	14878	41643	36901	44504	CDS	peg.413	419256	420263	1008	-	Molybdenum cofactor biosynthesis protein MoaA	CDW43_RS01965	CDW43_RS01965	GTP 3',8-cyclase MoaA	GTP 3',8-cyclase MoaA			3904	3120	6124	7180	8977	4447	9884	12926	1596		9043.65	6088.29	9078.37	9062.5	10457.3	14759.9	41312.5	36608.1	44150.8
CDS	peg.432	Q7A_440	445058	445339	282	-	hypothetical protein	zinc-binding protein; AFI83291.2	2664	1571	2232	2249	2944	4634	13016	11874	14156	CDS	peg.414	420377	420658	282	-	hypothetical protein	CDW43_RS01970	#N/A	zinc-binding protein	#N/A			983	842	1693	2467	2965	1263	2624	3632	553		9446.81	5570.92	7914.89	7975.18	10439.7	16432.6	46156	42106.4	50198.6
CDS	peg.433	Q7A_441	446241	448163	1923	+	Nitrate/nitrite sensor protein (EC 2.7.3.-)	hypothetical protein; AFI83292.1	31942	21296	31857	47927	35310	58163	44001	51556	54223	CDS	peg.415	421560	423482	1923	+	Nitrate/nitrite sensor protein (EC 2.7.3.-)	CDW43_RS01975	CDW43_RS01975	type IV pili methyl-accepting chemotaxis transducer N-terminal domain-containing protein	type IV pili methyl-accepting chemotaxis transducer N-terminal domain-containing protein			11747	9999	34712	34964	45176	24546	20227	23413	4177		16610.5	11074.4	16566.3	24923	18361.9	30246	22881.4	26810.2	28197.1
CDS	peg.434	Q7A_442	448160	448822	663	+	Nitrate/nitrite response regulator protein	DNA-binding response regulator; AFI83293.1	9915	6415	9259	11913	9173	16327	13801	16304	14635	CDS	peg.416	423479	424141	663	+	Nitrate/nitrite response regulator protein	CDW43_RS01980	CDW43_RS01980	response regulator transcription factor	response regulator transcription factor			3815	3324	10149	7035	10879	6279	5797	7026	816		14954.8	9675.72	13965.3	17968.3	13835.6	24625.9	20816	24591.3	22073.9
CDS	peg.435	#N/A	448972	449094	123	-	hypothetical protein	#N/A	2738	1607	2487	3081	2486	4410	1618	1675	1804	CDS	peg.417	424291	424413	123	-	hypothetical protein	#N/A	#N/A	#N/A	#N/A			927	763	2208	1640	2288	1324	727	887	101		22260.2	13065	20219.5	25048.8	20211.4	35853.7	13154.5	13617.9	14666.7
CDS	peg.436	Q7A_444	449484	450749	1266	+	Nitrate/nitrite transporter	MFS transporter; AFI83295.1	35351	20142	26589	7660	18271	28786	81252	42499	33460	CDS	peg.418	424803	426068	1266	+	Nitrate/nitrite transporter	CDW43_RS01985	CDW43_RS01985	NarK/NasA family nitrate transporter	NarK/NasA family nitrate transporter			8288	5027	1450	1770	3759	3573	43779	68371	1146		27923.4	15910	21002.4	6050.55	14432.1	22737.8	64180.1	33569.5	26429.7
CDS	peg.437	Q7A_445	450762	452372	1611	+	Nitrate/nitrite transporter	antiporter; AFI83296.1	72846	39066	62760	19066	50736	81304	86682	23907	12298	CDS	peg.419	426081	427691	1611	+	Nitrate/nitrite transporter	CDW43_RS01990	CDW43_RS01990	MFS transporter	MFS transporter			14873	9587	3760	5220	13044	13081	49975	48181	1589		45217.9	24249.5	38957.2	11834.9	31493.5	50468	53806.3	14839.9	7633.77
CDS	peg.438	Q7A_446	452413	456168	3756	+	Respiratory nitrate reductase alpha chain (EC 1.7.99.4)	nitrate reductase subunit alpha; AFI83297.1	260351	123517	229307	61843	164307	281918	305048	81754	37666	CDS	peg.420	427732	431487	3756	+	Respiratory nitrate reductase alpha chain (EC 1.7.99.4)	CDW43_RS01995	CDW43_RS01995	nitrate reductase subunit alpha	nitrate reductase subunit alpha			35102	25946	16074	20314	51509	52029	209113	175601	10563		69316	32885.3	61050.9	16465.1	43745.2	75058	81216.2	21766.2	10028.2
CDS	peg.439	Q7A_447	456200	457744	1545	+	Respiratory nitrate reductase beta chain (EC 1.7.99.4)	nitrate reductase subunit beta; AFI83298.1	108673	48317	97781	29870	80901	134191	102755	24228	12914	CDS	peg.421	431519	433063	1545	+	Respiratory nitrate reductase beta chain (EC 1.7.99.4)	CDW43_RS02000	CDW43_RS02000	nitrate reductase subunit beta	nitrate reductase subunit beta			12926	10924	8532	10395	26862	26376	81919	54530	4839		70338.5	31273.1	63288.7	19333.3	52363.1	86855	66508.1	15681.6	8358.58
CDS	peg.440	Q7A_448	457757	458287	531	+	Respiratory nitrate reductase delta chain (EC 1.7.99.4)	nitrate reductase molybdenum cofactor assembly chaperone; AFI83299.1	36416	16360	35319	11052	24814	46023	47643	11405	6615	CDS	peg.422	433076	433606	531	+	Respiratory nitrate reductase delta chain (EC 1.7.99.4)	#N/A	CDW43_RS02005	#N/A	nitrate reductase molybdenum cofactor assembly chaperone			4561	3802	3536	4205	9875	9232	48335	27987	2989		68580	30809.8	66514.1	20813.6	46730.7	86672.3	89723.2	21478.3	12457.6
CDS	peg.441	Q7A_449	458287	458982	696	+	Respiratory nitrate reductase gamma chain (EC 1.7.99.4)	respiratory nitrate reductase subunit gamma; AFI83300.1	48966	19732	42044	16311	39936	64325	45982	15069	11427	CDS	peg.423	433606	434301	696	+	Respiratory nitrate reductase gamma chain (EC 1.7.99.4)	CDW43_RS02010	CDW43_RS02010	respiratory nitrate reductase subunit gamma	respiratory nitrate reductase subunit gamma			8188	5702	5565	6548	14686	12745	49242	25715	3772		70353.4	28350.6	60408	23435.3	57379.3	92421	66066.1	21650.9	16418.1
CDS	peg.442	Q7A_450	458999	459685	687	+	Carbonic anhydrase (EC 4.2.1.1)	carbonic anhydrase; AFI83301.1	28036	11015	24036	12764	31638	49959	33548	11778	9911	CDS	peg.424	434318	435004	687	+	Carbonic anhydrase (EC 4.2.1.1)	CDW43_RS02015	CDW43_RS02015	carbonic anhydrase	carbonic anhydrase			4748	4083	4117	4779	10653	8967	39166	18843	2656		40809.3	16033.5	34986.9	18579.3	46052.4	72720.5	48832.6	17144.1	14426.5
CDS	peg.443	Q7A_451	459787	461013	1227	+	FIG00483566: hypothetical protein	hypothetical protein; AFI83302.1	25019	11845	23463	16065	33142	53917	27810	12018	12002	CDS	peg.425	435106	436332	1227	+	FIG00483566: hypothetical protein	#N/A	CDW43_RS02020	#N/A	hypothetical protein			5641	4250	6504	8168	13962	9685	33011	17657	1914		20390.4	9653.63	19122.2	13092.9	27010.6	43942.1	22665	9794.62	9781.58
CDS	peg.444	Q7A_452	461913	462191	279	+	Coenzyme PQQ synthesis protein D	pyrroloquinoline quinone biosynthesis protein PqqD; AFI83303.1	37018	42262	44537	2196	9175	23521	3201	2093	1989	CDS	peg.426	437232	437510	279	+	Coenzyme PQQ synthesis protein D	CDW43_RS02030	CDW43_RS02030	pyrroloquinoline quinone biosynthesis peptide chaperone PqqD	pyrroloquinoline quinone biosynthesis peptide chaperone PqqD			6679	5996	11247	2965	5649	5164	9311	7146	1317		132681	151477	159631	7870.97	32885.3	84304.7	11473.1	7501.79	7129.03
CDS	peg.445	Q7A_453	462160	463320	1161	+	Coenzyme PQQ synthesis protein E	pyrroloquinoline quinone biosynthesis protein PqqE; AFI83304.1	70283	74427	80499	4685	18717	45610	9108	6779	6526	CDS	peg.427	437479	438639	1161	+	Coenzyme PQQ synthesis protein E	CDW43_RS02035	CDW43_RS02035	pyrroloquinoline quinone biosynthesis protein PqqE	pyrroloquinoline quinone biosynthesis protein PqqE			11862	10641	21389	5999	10878	9613	22567	15093	2791		60536.6	64105.9	69335.9	4035.31	16121.4	39285.1	7844.96	5838.93	5621.02
CDS	peg.446	#N/A	463505	463933	429	+	Conserved domain protein	#N/A	20142	19051	22516	2739	5988	14182	2376	2303	2520	CDS	peg.428	438806	439252	447	+	Conserved domain protein	#N/A	CDW43_RS02040	#N/A	urate hydroxylase PuuD			4018	3343	7569	2426	4608	3795	5257	3615	682		46951	44407.9	52484.8	6384.62	13958	33058.3	5538.46	5368.3	5874.13
CDS	peg.447	Q7A_455	463950	465050	1101	+	Phosphoserine aminotransferase (EC 2.6.1.52)	phosphoserine transaminase; AFI83306.1	28178	29775	35049	6591	10555	25029	6383	6022	7462	CDS	peg.429	439269	440369	1101	+	Phosphoserine aminotransferase (EC 2.6.1.52)	CDW43_RS02045	CDW43_RS02045	3-phosphoserine/phosphohydroxythreonine transaminase	3-phosphoserine/phosphohydroxythreonine transaminase			5861	4825	12396	5078	8294	6216	11001	8111	1192		25593.1	27043.6	31833.8	5986.38	9586.74	22733	5797.46	5469.57	6777.48
CDS	peg.448	#N/A	465183	465938	756	+	Dihydroorotate dehydrogenase (EC 1.3.3.1)	#N/A	15225	13004	16681	5663	5733	13005	4756	4811	6054	CDS	peg.430	440502	441257	756	+	Dihydroorotate dehydrogenase (EC 1.3.3.1)	CDW43_RS02050	CDW43_RS02050	dihydroorotate dehydrogenase	dihydroorotate dehydrogenase			2929	2429	7575	3931	5611	3499	5117	4408	699		20138.9	17201.1	22064.8	7490.74	7583.33	17202.4	6291.01	6363.76	8007.94
CDS	peg.449	#N/A	465964	466812	849	+	Mobile element protein	#N/A	13905	9587	13453	6828	7171	12716	8994	10440	11692	CDS	peg.431	441283	442131	849	+	Mobile element protein	#N/A	CDW43_RS02055	#N/A	IS5 family transposase			3850	2829	6936	4885	6745	3795	6880	6761	971		16378.1	11292.1	15845.7	8042.4	8446.41	14977.6	10593.6	12296.8	13771.5
CDS	peg.450	Q7A_458	467074	469236	2163	+	Nitrous oxide reductase maturation protein NosR	regulatory protein NosR; AFI83309.1	38450	23560	35390	38780	32052	55409	84054	93006	106435	CDS	peg.432	442393	444555	2163	+	Nitrous oxide reductase maturation protein NosR	CDW43_RS02060	CDW43_RS02060	NosR/NirI family protein	NosR/NirI family protein			13282	10527	32046	25136	33061	18625	39119	41812	6313		17776.2	10892.3	16361.5	17928.8	14818.3	25616.7	38859.9	42998.6	49207.1
CDS	peg.451	Q7A_459	469279	471195	1917	+	Nitrous-oxide reductase (EC 1.7.99.6)	TAT-dependent nitrous-oxide reductase; AJO16109.1	118346	85670	120171	101573	79883	151199	128250	127451	116050	CDS	peg.433	444598	446514	1917	+	Nitrous-oxide reductase (EC 1.7.99.6)	CDW43_RS02065	CDW43_RS02065	TAT-dependent nitrous-oxide reductase	TAT-dependent nitrous-oxide reductase			31860	28528	92934	72254	100383	52132	63615	66843	13547		61735	44689.6	62687	52985.4	41670.8	78872.7	66901.4	66484.6	60537.3
CDS	peg.452	Q7A_461	471277	472566	1290	+	Nitrous oxide reductase maturation protein NosD	copper-binding protein; AFI83310.1	33144	22136	34277	32476	24249	50725	28501	27098	27726	CDS	peg.434	446596	447885	1290	+	Nitrous oxide reductase maturation protein NosD	#N/A	CDW43_RS02070	#N/A	nitrous oxide reductase family maturation protein NosD			8636	7457	29088	17339	26013	14905	16285	16345	1752		25693	17159.7	26571.3	25175.2	18797.7	39321.7	22093.8	21006.2	21493
CDS	peg.453	Q7A_462	472563	473462	900	+	Nitrous oxide reductase maturation protein NosF (ATPase)	ABC transporter ATP-binding protein; AFI83311.1	14524	9560	15059	14689	11811	23034	10414	11132	11707	CDS	peg.435	447882	448781	900	+	Nitrous oxide reductase maturation protein NosF (ATPase)	CDW43_RS02075	CDW43_RS02075	ABC transporter ATP-binding protein	ABC transporter ATP-binding protein			3931	3390	10059	5929	9559	5839	7389	7109	747		16137.8	10622.2	16732.2	16321.1	13123.3	25593.3	11571.1	12368.9	13007.8
CDS	peg.454	Q7A_463	473462	474292	831	+	Nitrous oxide reductase maturation transmembrane protein NosY	hypothetical protein; AFI83312.1	20608	13213	20957	18058	13953	28772	9796	8951	10005	CDS	peg.436	448781	449611	831	+	Nitrous oxide reductase maturation transmembrane protein NosY	CDW43_RS02080	CDW43_RS02080	ABC transporter permease	ABC transporter permease			6009	5060	16386	9769	15224	9319	7900	6828	918		24799	15900.1	25219	21730.4	16790.6	34623.3	11788.2	10771.4	12039.7
CDS	peg.455	Q7A_464	474289	474801	513	+	Nitrous oxide reductase maturation protein, outer-membrane lipoprotein NosL	nitrous oxide reductase accessory protein NosL; AFI83313.1	11156	7046	11330	9563	7693	15984	7681	6555	6756	CDS	peg.437	449608	450120	513	+	Nitrous oxide reductase maturation protein, outer-membrane lipoprotein NosL	CDW43_RS02085	CDW43_RS02085	nitrous oxide reductase accessory protein NosL	nitrous oxide reductase accessory protein NosL			2808	2570	9714	5313	8342	5180	5521	4921	676		21746.6	13734.9	22085.8	18641.3	14996.1	31157.9	14972.7	12777.8	13169.6
CDS	peg.456	Q7A_465	475615	477663	2049	+	Ribonucleotide reductase of class III (anaerobic), large subunit (EC 1.17.4.2)	anaerobic ribonucleoside triphosphate reductase; AFI83314.1	53184	30680	48758	8788	13882	25094	63865	46737	39400	CDS	peg.438	450934	452982	2049	+	Ribonucleotide reductase of class III (anaerobic), large subunit (EC 1.17.4.2)	#N/A	#N/A	#N/A	#N/A			25495	16187	10030	5641	8309	5234	17621	18700	10650		25956.1	14973.2	23796	4288.92	6775.01	12246.9	31168.9	22809.7	19228.9
CDS	peg.457	#N/A	477689	477859	171	+	hypothetical protein	#N/A	22078	10831	20271	4120	7311	11635	30295	23187	17206	CDS	peg.439	453008	453178	171	+	hypothetical protein	#N/A	CDW43_RS02090	#N/A	ribonucleoside triphosphate reductase			10790	6739	4829	3967	5186	2839	7849	8223	5304		129111	63339.2	118544	24093.6	42754.4	68040.9	177164	135596	100620
CDS	peg.458	Q7A_467	477881	478561	681	+	Ribonucleotide reductase of class III (anaerobic), activating protein (EC 1.97.1.4)	anaerobic ribonucleoside-triphosphate reductase activating protein; AFI83316.1	27070	15611	27061	7111	11302	17789	41472	32110	24795	CDS	peg.440	453200	453880	681	+	Ribonucleotide reductase of class III (anaerobic), activating protein (EC 1.97.1.4)	CDW43_RS02100	CDW43_RS02100	anaerobic ribonucleoside-triphosphate reductase activating protein	anaerobic ribonucleoside-triphosphate reductase activating protein			14137	9405	8342	5577	7786	4417	11697	11855	5529		39750.4	22923.6	39737.2	10442	16596.2	26121.9	60898.7	47151.2	36409.7
CDS	peg.459	Q7A_468	478711	479598	888	+	Pyridoxine biosynthesis glutamine amidotransferase, synthase subunit (EC 2.4.2.-)	pyridoxal 5'-phosphate synthase lyase subunit PdxS; AFI83317.1	19279	11856	18681	12041	12497	23269	32004	23191	19881	CDS	peg.441	454030	454917	888	+	Pyridoxine biosynthesis glutamine amidotransferase, synthase subunit (EC 2.4.2.-)	CDW43_RS02105	CDW43_RS02105	pyridoxal 5'-phosphate synthase lyase subunit PdxS	pyridoxal 5'-phosphate synthase lyase subunit PdxS			10015	7921	13731	9719	13829	7463	15038	12913	3574		21710.6	13351.4	21037.2	13559.7	14073.2	26203.8	36040.5	26116	22388.5
CDS	peg.460	Q7A_469	479599	480165	567	+	Pyridoxine biosynthesis glutamine amidotransferase, glutaminase subunit (EC 2.4.2.-)	pyridoxal 5'-phosphate synthase glutaminase subunit PdxT; AFI83318.2	17457	11315	17832	13822	13127	22394	29635	21951	18685	CDS	peg.442	454918	455484	567	+	Pyridoxine biosynthesis glutamine amidotransferase, glutaminase subunit (EC 2.4.2.-)	CDW43_RS02110	CDW43_RS02110	pyridoxal 5'-phosphate synthase glutaminase subunit PdxT	pyridoxal 5'-phosphate synthase glutaminase subunit PdxT			8634	7255	13910	8714	13425	7896	14800	14535	2834		30788.4	19955.9	31449.7	24377.4	23151.7	39495.6	52266.3	38714.3	32954.1
CDS	peg.461	Q7A_470	480184	480720	537	+	Molybdopterin biosynthesis molybdochelatase MogA	molybdopterin adenylyltransferase; AFI83319.2	15668	9899	15644	7623	7838	15767	14412	10912	9806	CDS	peg.443	455503	456039	537	+	Molybdopterin biosynthesis molybdochelatase MogA	#N/A	CDW43_RS02115	#N/A	molybdopterin adenylyltransferase			6548	5315	9583	6077	9480	5593	9435	8458	2088		29176.9	18433.9	29132.2	14195.5	14595.9	29361.3	26838	20320.3	18260.7
CDS	peg.462	Q7A_471	480742	481257	516	-	FIG138517: Putative lipid carrier protein	hypothetical protein; AFI83320.2	14473	9071	13539	2058	3469	7456	7277	5632	5305	CDS	peg.444	456061	456576	516	-	FIG138517: Putative lipid carrier protein	CDW43_RS02120	#N/A	SCP2 sterol-binding domain-containing protein	#N/A			4388	3490	3542	2096	2939	1794	7669	7847	1254		28048.4	17579.5	26238.4	3988.37	6722.87	14449.6	14102.7	10914.7	10281
CDS	peg.463	Q7A_472	481416	482411	996	+	FIG139552: Putative protease	protease; AFI83321.1	14855	10416	14250	3087	5913	11207	13001	9035	8781	CDS	peg.445	456735	457730	996	+	FIG139552: Putative protease	CDW43_RS02125	CDW43_RS02125	U32 family peptidase	U32 family peptidase			4606	3722	4691	2983	4097	2194	7799	8274	1310		14914.7	10457.8	14307.2	3099.4	5936.75	11252	13053.2	9071.29	8816.27
CDS	peg.464	Q7A_473	482449	483354	906	+	FIG139928: Putative protease	U32 family peptidase; AFI83322.1	18124	11907	17263	4563	7313	13847	17191	11370	10476	CDS	peg.446	457768	458673	906	+	FIG139928: Putative protease	CDW43_RS02130	CDW43_RS02130	U32 family peptidase	U32 family peptidase			4581	3821	7051	3821	5831	3455	10613	9152	1259		20004.4	13142.4	19054.1	5036.42	8071.74	15283.7	18974.6	12549.7	11562.9
CDS	peg.465	Q7A_474	483472	483885	414	-	Copper-containing nitrite reductase (EC 1.7.2.1)	hypothetical protein; AFI83323.2	5767	4341	6838	1317	1820	3933	3219	2233	2318	CDS	peg.447	458791	459204	414	-	Copper-containing nitrite reductase (EC 1.7.2.1)	CDW43_RS02135	CDW43_RS02135	cytochrome c	cytochrome c			1587	1505	2121	1261	1771	1010	3492	3263	565		13930	10485.5	16516.9	3181.16	4396.14	9500	7775.36	5393.72	5599.03
CDS	peg.466	Q7A_03205	484154	484345	192	-	hypothetical protein	hypothetical protein; ASF49057.1	2980	1784	3259	1389	1408	3114	2248	1897	1918	CDS	peg.449	459651	459830	180	-	hypothetical protein	#N/A	#N/A	#N/A	#N/A			524	472	1940	1884	2051	1190	2524	2584	493		15520.8	9291.67	16974	7234.38	7333.33	16218.8	11708.3	9880.21	9989.58
CDS	peg.467	Q7A_477	484471	485202	732	+	conserved hypothetical protein	hypothetical protein; AFI83326.1	7234	4572	7189	4643	3482	9242	5037	4019	4364	CDS	peg.450	459790	460521	732	+	conserved hypothetical protein	CDW43_RS02145	CDW43_RS02145	hypothetical protein	hypothetical protein			1923	1775	7387	5437	7264	4181	7050	6736	1149		9882.51	6245.9	9821.04	6342.9	4756.83	12625.7	6881.15	5490.44	5961.75
CDS	peg.468	Q7A_478	485208	485651	444	-	Putative copper export protein	copper resistance protein CopD; AFI83327.1	7517	4518	6605	5820	4477	10477	3088	2797	3301	CDS	peg.451	460527	460970	444	-	Putative copper export protein	CDW43_RS02150	CDW43_RS02150	copper resistance protein CopD	copper resistance protein CopD			2271	1873	6997	5747	8101	4843	4654	4309	775		16930.2	10175.7	14876.1	13108.1	10083.3	23596.8	6954.95	6299.55	7434.68
CDS	peg.469	Q7A_479	485683	488334	2652	-	Nitrate/nitrite transporter	NarK family nitrate/nitrite MFS transporter; AFI83328.1	33300	20728	31331	38913	31419	59961	11756	11328	12365	CDS	peg.452	461002	463653	2652	-	Nitrate/nitrite transporter	CDW43_RS16625	#N/A	NarK family nitrate/nitrite MFS transporter	#N/A			11041	8482	30830	30531	43629	25230	14288	14204	2948		12556.6	7815.99	11814.1	14673.1	11847.3	22609.7	4432.88	4271.49	4662.52
CDS	peg.470	Q7A_480	488353	489111	759	-	Peptidyl-prolyl cis-trans isomerase PpiD (EC 5.2.1.8)	peptidylprolyl isomerase; AFI83329.1	10637	7104	10039	15244	13229	24646	2571	3200	2382	CDS	peg.453	463672	464430	759	-	Peptidyl-prolyl cis-trans isomerase PpiD (EC 5.2.1.8)	CDW43_RS02160	CDW43_RS02160	peptidylprolyl isomerase	peptidylprolyl isomerase			2824	2257	8590	15811	17624	8252	2840	3032	702		14014.5	9359.68	13226.6	20084.3	17429.5	32471.7	3387.35	4216.07	3138.34
CDS	peg.471	Q7A_481	489129	489818	690	-	Respiratory nitrate reductase gamma chain (EC 1.7.99.4)	respiratory nitrate reductase subunit gamma; AFI83330.1	4590	3034	4342	5936	5237	10841	2061	2504	1750	CDS	peg.454	464448	465137	690	-	Respiratory nitrate reductase gamma chain (EC 1.7.99.4)	CDW43_RS02165	CDW43_RS02165	respiratory nitrate reductase subunit gamma	respiratory nitrate reductase subunit gamma			1203	1063	4329	6380	8003	3641	2487	2460	787		6652.17	4397.1	6292.75	8602.9	7589.86	15711.6	2986.96	3628.99	2536.23
CDS	peg.472	Q7A_482	489854	490552	699	-	Respiratory nitrate reductase delta chain (EC 1.7.99.4)	nitrate reductase molybdenum cofactor assembly chaperone; AFI83331.1	14280	9590	13613	20912	16334	32657	3684	4383	2776	CDS	peg.455	465173	465871	699	-	Respiratory nitrate reductase delta chain (EC 1.7.99.4)	CDW43_RS02170	CDW43_RS02170	nitrate reductase molybdenum cofactor assembly chaperone	nitrate reductase molybdenum cofactor assembly chaperone			3227	2723	14374	22636	29932	14290	3853	4007	645		20429.2	13719.6	19475	29917	23367.7	46719.6	5270.39	6270.39	3971.39
CDS	peg.473	Q7A_483	490555	492093	1539	-	Respiratory nitrate reductase beta chain (EC 1.7.99.4)	nitrate reductase subunit beta; AFI83332.1	42643	31904	45385	61898	44602	95662	6751	8267	5008	CDS	peg.456	465874	467412	1539	-	Respiratory nitrate reductase beta chain (EC 1.7.99.4)	CDW43_RS02175	CDW43_RS02175	nitrate reductase subunit beta	nitrate reductase subunit beta			8371	7289	53251	81319	105391	52376	7711	7712	1693		27708.3	20730.3	29489.9	40219.6	28981.2	62158.5	4386.61	5371.67	3254.06
CDS	peg.474	Q7A_484	492090	495833	3744	-	Respiratory nitrate reductase alpha chain (EC 1.7.99.4)	nitrate reductase subunit alpha; AFI83333.1	114601	81686	112348	161487	134616	245330	28246	29759	22774	CDS	peg.457	467409	471152	3744	-	Respiratory nitrate reductase alpha chain (EC 1.7.99.4)	CDW43_RS02180	CDW43_RS02180	nitrate reductase subunit alpha	nitrate reductase subunit alpha			28163	23566	103389	178252	215721	109046	24512	26689	8249		30609.2	21817.8	30007.5	43132.2	35955.1	65526.2	7544.34	7948.45	6082.8
CDS	peg.475	Q7A_485	496188	498236	2049	-	Nitric oxide reductase activation protein NorD	VWA domain-containing protein; AFI83334.1	13497	7865	12799	18737	14019	27149	5299	5084	5383	CDS	peg.458	471507	473555	2049	-	Nitric oxide reductase activation protein NorD	CDW43_RS02185	CDW43_RS02185	hypothetical protein	hypothetical protein			4130	3489	16222	10883	17876	10080	7174	7250	1377		6587.12	3838.46	6246.46	9144.46	6841.87	13249.9	2586.14	2481.21	2627.14
CDS	peg.476	Q7A_486	498269	499087	819	-	Nitric oxide reductase activation protein NorQ	CbbQ/NirQ/NorQ/GpvN family protein; AFI83335.1	12712	7211	10930	20669	16958	26389	4347	4338	3768	CDS	peg.459	473588	474406	819	-	Nitric oxide reductase activation protein NorQ	CDW43_RS02190	CDW43_RS02190	CbbQ/NirQ/NorQ/GpvN family protein	CbbQ/NirQ/NorQ/GpvN family protein			5073	3994	16772	14576	22410	12165	5318	5440	832		15521.4	8804.64	13345.5	25236.9	20705.7	32221	5307.69	5296.7	4600.73
CDS	peg.477	Q7A_487	499084	500445	1362	-	Nitric-oxide reductase subunit B (EC 1.7.99.7)	nitric-oxide reductase large subunit; AFI83336.1	13319	7905	10852	24001	20804	33244	7559	7360	6859	CDS	peg.460	474403	475764	1362	-	Nitric-oxide reductase subunit B (EC 1.7.99.7)	CDW43_RS02195	CDW43_RS02195	cbb3-type cytochrome c oxidase subunit I	cbb3-type cytochrome c oxidase subunit I			5991	4515	18671	22602	29653	15235	7224	8180	1830		9779	5803.96	7967.69	17621.9	15274.6	24408.2	5549.93	5403.82	5035.98
CDS	peg.478	Q7A_488	500506	501336	831	-	Nitric-oxide reductase subunit C (EC 1.7.99.7)	cytochrome C; AFI83337.1	8611	5120	7150	15457	13002	20360	6858	7439	6859	CDS	peg.461	475825	476655	831	-	Nitric-oxide reductase subunit C (EC 1.7.99.7)	CDW43_RS02200	CDW43_RS02200	cytochrome c	cytochrome c			3581	3035	11072	14766	18293	8941	4682	6944	3103		10362.2	6161.25	8604.09	18600.5	15646.2	24500.6	8252.71	8951.87	8253.91
CDS	peg.479	#N/A	501351	501476	126	-	hypothetical protein	#N/A	4515	3220	4184	6670	4926	8986	2616	2838	2976	CDS	peg.462	476670	476795	126	-	hypothetical protein	#N/A	#N/A	#N/A	#N/A			1587	1456	7472	7196	9294	5278	1835	2941	1673		35833.3	25555.6	33206.3	52936.5	39095.2	71317.5	20761.9	22523.8	23619
CDS	peg.480	Q7A_490	502351	502776	426	-	hypothetical protein	ribonucleotide reductase subunit alpha; AFI83339.1	4361	2157	3326	2752	2307	4463	2597	2334	2238	CDS	peg.463	477670	478095	426	-	hypothetical protein	CDW43_RS02210	CDW43_RS02210	hypothetical protein	hypothetical protein			1420	1402	3390	2592	3759	1893	4293	3461	589		10237.1	5063.38	7807.51	6460.09	5415.49	10476.5	6096.24	5478.87	5253.52
CDS	peg.481	#N/A	504056	504265	210	-	hypothetical protein	#N/A	2063	1677	2379	2583	1598	3532	1857	2013	2041	CDS	peg.464	479375	479584	210	-	hypothetical protein	#N/A	#N/A	#N/A	#N/A			592	575	1955	2201	2527	1640	1625	1575	211		9823.81	7985.71	11328.6	12300	7609.52	16819	8842.86	9585.71	9719.05
CDS	peg.482	Q7A_493	504327	505700	1374	-	Coproporphyrinogen III oxidase, oxygen-independent (EC 1.3.99.22)	oxygen-independent coproporphyrinogen III oxidase; AFI83341.1	14758	11044	14918	21345	15202	25284	18850	21357	22293	CDS	peg.465	479646	481019	1374	-	Coproporphyrinogen III oxidase, oxygen-independent (EC 1.3.99.22)	CDW43_RS02225	CDW43_RS02225	oxygen-independent coproporphyrinogen III oxidase	oxygen-independent coproporphyrinogen III oxidase			6368	5611	16011	23595	24751	12189	12618	13807	3073		10740.9	8037.85	10857.4	15534.9	11064	18401.7	13719.1	15543.7	16224.9
CDS	peg.483	Q7A_494	505781	506452	672	-	hypothetical protein	Rossman fold protein%2C TIGR00730 family; AFI83342.1	3021	2283	3326	4246	3573	5888	1370	1213	1193	CDS	peg.466	481100	481771	672	-	hypothetical protein	CDW43_RS02230	CDW43_RS02230	TIGR00730 family Rossman fold protein	TIGR00730 family Rossman fold protein			1547	1300	3976	4758	5217	2819	2051	2151	586		4495.54	3397.32	4949.4	6318.45	5316.96	8761.9	2038.69	1805.06	1775.3
CDS	peg.484	Q7A_495	506630	507922	1293	+	Phosphoribosylamine--glycine ligase (EC 6.3.4.13)	phosphoribosylamine--glycine ligase; AFI83343.1	20588	11790	18710	16192	14567	26095	6566	3754	3579	CDS	peg.467	481949	483241	1293	+	Phosphoribosylamine--glycine ligase (EC 6.3.4.13)	CDW43_RS02235	CDW43_RS02235	phosphoribosylamine--glycine ligase	phosphoribosylamine--glycine ligase			8857	7429	13660	6284	10525	6078	10511	7514	1220		15922.7	9118.33	14470.2	12522.8	11266	20181.7	5078.11	2903.33	2767.98
CDS	peg.485	Q7A_496	507951	508823	873	+	Phosphoribulokinase (EC 2.7.1.19)	phosphoribulokinase; AFI83344.1	13687	8920	13327	13937	11355	19766	4102	3274	2995	CDS	peg.468	483270	484142	873	+	Phosphoribulokinase (EC 2.7.1.19)	CDW43_RS02240	CDW43_RS02240	phosphoribulokinase	phosphoribulokinase			5579	4688	11146	9569	12680	6606	6585	4483	1417		15678.1	10217.6	15265.8	15964.5	13006.9	22641.5	4698.74	3750.29	3430.7
CDS	peg.486	Q7A_497	508857	509411	555	+	TsaC protein (YrdC domain) required for threonylcarbamoyladenosine t(6)A37 modification in tRNA	tRNA threonylcarbamoyladenosine biosynthesis protein RimN; AFI83345.1	7861	4968	7656	6458	5081	9371	1334	1075	1072	CDS	peg.469	484176	484730	555	+	TsaC protein (YrdC domain) required for threonylcarbamoyladenosine t(6)A37 modification in tRNA	CDW43_RS02245	CDW43_RS02245	Sua5/YciO/YrdC/YwlC family protein	Sua5/YciO/YrdC/YwlC family protein			3503	2719	5800	4250	5685	3255	1868	1486	408		14164	8951.35	13794.6	11636	9154.95	16884.7	2403.6	1936.94	1931.53
CDS	peg.487	Q7A_498	509408	510334	927	+	Coproporphyrinogen III oxidase, aerobic (EC 1.3.3.3)	coproporphyrinogen III oxidase; AFI83346.1	12323	7118	11565	8124	7245	13390	2119	1578	1491	CDS	peg.470	484727	485653	927	+	Coproporphyrinogen III oxidase, aerobic (EC 1.3.3.3)	CDW43_RS02250	CDW43_RS02250	oxygen-dependent coproporphyrinogen oxidase	oxygen-dependent coproporphyrinogen oxidase			5786	4306	9238	5182	8380	4772	3743	2529	510		13293.4	7678.53	12475.7	8763.75	7815.53	14444.4	2285.87	1702.27	1608.41
CDS	peg.488	Q7A_499	510577	511665	1089	-	Peptide chain release factor 1	peptide chain release factor 1; AFI83347.1	11937	6860	11216	10972	8598	15871	9712	7451	6865	CDS	peg.472	485896	486984	1089	-	Peptide chain release factor 1	CDW43_RS02255	CDW43_RS02255	peptide chain release factor 1	peptide chain release factor 1			4421	3324	7910	3788	6523	3871	8164	6659	976		10961.4	6299.36	10299.4	10075.3	7895.32	14573.9	8918.27	6842.06	6303.95
CDS	peg.489	Q7A_500	511669	512928	1260	-	Glutamyl-tRNA reductase (EC 1.2.1.70)	glutamyl-tRNA reductase; AFI83348.1	16078	9231	14707	20310	14756	25229	17254	15229	16407	CDS	peg.473	486988	488247	1260	-	Glutamyl-tRNA reductase (EC 1.2.1.70)	CDW43_RS02260	CDW43_RS02260	glutamyl-tRNA reductase	glutamyl-tRNA reductase			6060	4964	12117	9501	14204	7800	12045	13234	1916		12760.3	7326.19	11672.2	16119	11711.1	20023	13693.7	12086.5	13021.4
CDS	peg.490	Q7A_501	513051	514826	1776	+	FIG140336: TPR domain protein	hypothetical protein; AFI83349.1	19962	12332	16711	22723	19861	33651	16219	15272	15239	CDS	peg.474	488370	490145	1776	+	FIG140336: TPR domain protein	CDW43_RS02265	CDW43_RS02265	tetratricopeptide repeat protein	tetratricopeptide repeat protein			7310	5651	19233	20318	25626	12693	11290	12924	2626		11239.9	6943.69	9409.35	12794.5	11183	18947.6	9132.32	8599.1	8580.52
CDS	peg.491	Q7A_502	514823	515422	600	+	Outer membrane lipoprotein LolB precursor	outer membrane lipoprotein LolB; AFI83350.1	12667	7956	11764	15157	12109	20061	7324	7216	6487	CDS	peg.475	490142	490741	600	+	Outer membrane lipoprotein LolB precursor	CDW43_RS02270	CDW43_RS02270	lipoprotein insertase outer membrane protein LolB	lipoprotein insertase outer membrane protein LolB			4522	3402	12308	9296	13110	7309	4507	5387	859		21111.7	13260	19606.7	25261.7	20181.7	33435	12206.7	12026.7	10811.7
CDS	peg.492	Q7A_503	515419	516288	870	+	4-diphosphocytidyl-2-C-methyl-D-erythritol kinase (EC 2.7.1.148)	4-(cytidine 5'-diphospho)-2-C-methyl-D-erythritol kinase; AFI83351.1	121669	58660	92247	69570	67092	114805	34500	22779	23307	CDS	peg.476	490738	491607	870	+	4-diphosphocytidyl-2-C-methyl-D-erythritol kinase (EC 2.7.1.148)	CDW43_RS02275	CDW43_RS02275	4-(cytidine 5'-diphospho)-2-C-methyl-D-erythritol kinase	4-(cytidine 5'-diphospho)-2-C-methyl-D-erythritol kinase			73436	51351	66889	25509	48319	30357	63447	52404	5645		139849	67425.3	106031	79965.5	77117.2	131960	39655.2	26182.8	26789.7
CDS	peg.493	Q7A_505	516421	517407	987	+	Ribose-phosphate pyrophosphokinase (EC 2.7.6.1)	ribose-phosphate pyrophosphokinase; AFI83352.1	69597	36410	66026	54996	45348	90624	45209	26705	31925	CDS	peg.477	491740	492726	987	+	Ribose-phosphate pyrophosphokinase (EC 2.7.6.1)	#N/A	CDW43_RS02285	#N/A	ribose-phosphate diphosphokinase			24122	21841	44562	13969	26301	17726	82602	67474	9218		70513.7	36889.6	66895.6	55720.4	45945.3	91817.6	45804.5	27056.7	32345.5
CDS	peg.494	Q7A_506	517521	518195	675	+	LSU ribosomal protein L25p	50S ribosomal protein L25; AFI83353.1	70918	45886	71400	35477	30926	70776	24825	11112	11116	CDS	peg.478	492840	493514	675	+	LSU ribosomal protein L25p	CDW43_RS02290	CDW43_RS02290	50S ribosomal protein L25/general stress protein Ctc	50S ribosomal protein L25/general stress protein Ctc			22881	22720	53645	12287	25183	17478	65925	39229	10125		105064	67979.3	105778	52558.5	45816.3	104853	36777.8	16462.2	16468.1
CDS	peg.495	Q7A_507	518216	518788	573	+	Peptidyl-tRNA hydrolase (EC 3.1.1.29)	aminoacyl-tRNA hydrolase; AFI83354.1	15351	8212	13641	6231	5728	14656	6033	2736	3144	CDS	peg.479	493535	494107	573	+	Peptidyl-tRNA hydrolase (EC 3.1.1.29)	CDW43_RS02295	CDW43_RS02295	aminoacyl-tRNA hydrolase	aminoacyl-tRNA hydrolase			4665	4523	9844	2119	4446	3240	19445	11193	2199		26790.6	14331.6	23806.3	10874.3	9996.51	25577.7	10528.8	4774.87	5486.91
CDS	peg.496	Q7A_508	518890	519981	1092	+	GTP-binding and nucleic acid-binding protein YchF	GTP-binding protein YchF; AFI83355.1	15726	8846	14659	8177	8085	16897	7202	4458	5193	CDS	peg.480	494209	495300	1092	+	GTP-binding and nucleic acid-binding protein YchF	CDW43_RS02300	CDW43_RS02300	redox-regulated ATPase YchF	redox-regulated ATPase YchF			6300	5353	11601	7054	10084	4996	16680	11840	2665		14401.1	8100.73	13424	7488.1	7403.85	15473.4	6595.24	4082.42	4755.49
CDS	peg.497	Q7A_509	520039	521106	1068	+	Phospholipase A1 precursor (EC 3.1.1.32, EC 3.1.1.4) Outer membrane phospholipase A	phospholipase; AFI83356.1	11070	6738	10018	8598	8144	15469	6782	5485	6202	CDS	peg.481	495358	496425	1068	+	Phospholipase A1 precursor (EC 3.1.1.32, EC 3.1.1.4) Outer membrane phospholipase A	CDW43_RS02305	CDW43_RS02305	phospholipase A	phospholipase A			4322	3359	10760	9524	12551	6272	11119	8787	2307		10365.2	6308.99	9380.15	8050.56	7625.47	14484.1	6350.19	5135.77	5807.12
CDS	peg.498	Q7A_511	521412	522524	1113	-	Putative inner membrane protein	mechanosensitive ion channel protein MscS; AFI83357.1	4112	2061	4068	2326	2258	4575	4217	4071	5912	CDS	peg.482	496731	497744	1014	-	Putative inner membrane protein	CDW43_RS02315	#N/A	mechanosensitive ion channel family protein	#N/A			1782	1414	2696	1738	2453	1613	8756	8906	953		3694.52	1851.75	3654.99	2089.85	2028.75	4110.51	3788.86	3657.68	5311.77
CDS	peg.499	#N/A	522524	522637	114	-	hypothetical protein	#N/A	201	147	212	190	163	342	255	250	358	CDS	peg.483	497843	497956	114	-	hypothetical protein	#N/A	#N/A	#N/A	#N/A			132	99	278	167	233	159	350	409	104		1763.16	1289.47	1859.65	1666.67	1429.82	3000	2236.84	2192.98	3140.35
CDS	peg.500	Q7A_03220	522811	523104	294	-	Mobile element protein	IS5/IS1182 family transposase; ASF49060.1	615	340	585	546	561	791	385	362	548	CDS	peg.484	498130	498336	207	-	Mobile element protein	CDW43_RS02320	#N/A	IS5 family transposase	#N/A			164	125	310	195	326	152	181	257	58		2091.84	1156.46	1989.8	1857.14	1908.16	2690.48	1309.52	1231.29	1863.95
CDS	peg.501	#N/A	523101	523574	474	-	Mobile element protein	#N/A	1775	930	1390	1226	1337	1972	1058	998	1313	CDS	peg.485	498419	498892	474	-	Mobile element protein	#N/A	CDW43_RS02320	#N/A	IS5 family transposase			561	472	870	685	946	493	550	525	276		3744.73	1962.03	2932.49	2586.5	2820.68	4160.34	2232.07	2105.49	2770.04
CDS	peg.502	Q7A_515	523739	524125	387	+	hypothetical protein	hypothetical protein; AFI83361.1	3704	4331	3987	1512	1791	5169	528	462	537	CDS	peg.486	499057	499443	387	+	hypothetical protein	#N/A	CDW43_RS02325	#N/A	hypothetical protein			1567	1299	5921	3144	4729	3090	610	597	389		9571.06	11191.2	10302.3	3906.98	4627.91	13356.6	1364.34	1193.8	1387.6
CDS	peg.503	Q7A_516	524201	524626	426	+	hypothetical protein	hypothetical protein; AFI83362.1	6119	6574	6409	3347	3663	9286	2632	3455	4064	CDS	peg.487	499519	499944	426	+	hypothetical protein	CDW43_RS02330	CDW43_RS02330	hypothetical protein	hypothetical protein			2543	2199	9635	5281	8146	5057	1408	2173	466		14363.8	15431.9	15044.6	7856.81	8598.59	21798.1	6178.4	8110.33	9539.91
CDS	peg.504	Q7A_517	524623	525360	738	-	hypothetical protein	hypothetical protein; AFI83363.1	7245	5920	7059	6752	7062	11943	7562	9819	10939	CDS	peg.488	499941	500678	738	-	hypothetical protein	CDW43_RS02335	CDW43_RS02335	hypothetical protein	hypothetical protein			3031	2524	9045	8893	10207	5481	4608	6308	1238		9817.07	8021.68	9565.04	9149.05	9569.11	16182.9	10246.6	13304.9	14822.5
CDS	peg.505	Q7A_518	525439	526422	984	-	hypothetical protein	hypothetical protein; AFI83364.1	3762	2664	3822	3016	2637	5217	4719	4833	5338	CDS	peg.489	500757	501740	984	-	hypothetical protein	CDW43_RS02340	CDW43_RS02340	hypothetical protein	hypothetical protein			1678	1402	4705	4585	5628	2942	5510	5617	1203		3823.17	2707.32	3884.15	3065.04	2679.88	5301.83	4795.73	4911.59	5424.8
CDS	peg.506	Q7A_519	526608	527009	402	+	Large-conductance mechanosensitive channel	large-conductance mechanosensitive channel; AFI83365.1	1587	1275	1551	976	1090	2292	548	441	540	CDS	peg.490	501926	502327	402	+	Large-conductance mechanosensitive channel	CDW43_RS02345	CDW43_RS02345	large-conductance mechanosensitive channel protein MscL	large-conductance mechanosensitive channel protein MscL			1006	934	2237	2837	3086	1386	767	812	231		3947.76	3171.64	3858.21	2427.86	2711.44	5701.49	1363.18	1097.01	1343.28
CDS	peg.507	#N/A	527067	527678	612	+	hypothetical protein	#N/A	2641	1610	2302	1808	1776	3269	897	913	1057	CDS	peg.491	502382	502996	615	+	hypothetical protein	CDW43_RS02350	CDW43_RS02350	hypothetical protein	hypothetical protein			1357	1067	2715	2170	2903	1705	1231	1294	394		4315.36	2630.72	3761.44	2954.25	2901.96	5341.5	1465.69	1491.83	1727.12
CDS	peg.508	Q7A_521	527656	528606	951	-	RuBisCO operon transcriptional regulator CbbR	LysR family transcriptional regulator; AFI83367.1	2880	1622	2801	1644	1351	3184	888	822	1083	CDS	peg.492	502974	503924	951	-	RuBisCO operon transcriptional regulator CbbR	CDW43_RS02355	CDW43_RS02355	LysR family transcriptional regulator	LysR family transcriptional regulator			1120	1068	2752	1934	2871	1632	1255	1333	808		3028.39	1705.57	2945.32	1728.71	1420.61	3348.05	933.754	864.353	1138.8
CDS	peg.509	Q7A_522	528852	530270	1419	+	Ribulose bisphosphate carboxylase large chain (EC 4.1.1.39)	ribulose-bisphosphate carboxylase large subunit; AFI83368.1	14174	10313	11074	5961	5883	12061	3526	3422	3915	CDS	peg.493	504170	505588	1419	+	Ribulose bisphosphate carboxylase large chain (EC 4.1.1.39)	CDW43_RS02360	CDW43_RS02360	form I ribulose bisphosphate carboxylase large subunit	form I ribulose bisphosphate carboxylase large subunit			6288	5187	8578	6266	9184	4827	12075	5579	19175		9988.72	7267.79	7804.09	4200.85	4145.88	8499.65	2484.85	2411.56	2758.99
CDS	peg.510	Q7A_523	530340	530696	357	+	Ribulose bisphosphate carboxylase small chain (EC 4.1.1.39)	ribulose bisphosphate carboxylase small subunit; AFI83369.1	3696	2821	3349	1911	1737	3725	791	738	876	CDS	peg.494	505658	506014	357	+	Ribulose bisphosphate carboxylase small chain (EC 4.1.1.39)	CDW43_RS02365	CDW43_RS02365	ribulose bisphosphate carboxylase small subunit	ribulose bisphosphate carboxylase small subunit			1321	1280	3107	2266	3357	1796	870	698	3011		10352.9	7901.96	9380.95	5352.94	4865.55	10434.2	2215.69	2067.23	2453.78
CDS	peg.511	Q7A_524	530789	531601	813	+	Rubisco activation protein CbbQ	CbbQ/NirQ/NorQ/GpvN family protein; AFI83370.1	3810	2453	3283	2366	1893	4209	1247	1210	1646	CDS	peg.495	506107	506919	813	+	Rubisco activation protein CbbQ	CDW43_RS02370	CDW43_RS02370	CbbQ/NirQ/NorQ/GpvN family protein	CbbQ/NirQ/NorQ/GpvN family protein			1243	1034	2961	2192	3265	1876	1048	1041	2460		4686.35	3017.22	4038.13	2910.21	2328.41	5177.12	1533.83	1488.31	2024.6
CDS	peg.512	Q7A_525	531641	533983	2343	+	Rubisco activation protein CbbO	VWA domain-containing protein; AFI83371.1	6892	4418	6487	4246	3935	7815	2301	2290	2811	CDS	peg.496	506959	509301	2343	+	Rubisco activation protein CbbO	CDW43_RS02375	CDW43_RS02375	VWA domain-containing protein	VWA domain-containing protein			2767	2414	5185	4316	5939	3150	2521	2980	2198		2941.53	1885.62	2768.67	1812.21	1679.47	3335.47	982.074	977.379	1199.74
CDS	peg.513	#N/A	534229	534570	342	+	FIG01182371: hypothetical protein	#N/A	1242	726	1351	584	535	1283	397	311	408	CDS	peg.497	509547	509888	342	+	FIG01182371: hypothetical protein	#N/A	CDW43_RS02380	#N/A	hypothetical protein			254	249	666	510	647	348	423	413	199		3631.58	2122.81	3950.29	1707.6	1564.33	3751.46	1160.82	909.357	1192.98
CDS	peg.514	Q7A_527	534684	538940	4257	-	diguanylate cyclase/phosphodiesterase (GGDEF & EAL domains) with PAS/PAC sensor(s)	myristoyl transferase; AFI83373.1	26061	14584	25281	13202	12370	29195	11666	9836	11788	CDS	peg.498	510002	514247	4246	-	diguanylate cyclase/phosphodiesterase (GGDEF & EAL domains) with PAS/PAC sensor(s)	CDW43_RS16635	#N/A	EAL domain-containing protein	#N/A			5741	5201	16206	6783	10844	6894	15030	13743	1921		6121.92	3425.89	5938.69	3101.25	2905.8	6858.12	2740.43	2310.55	2769.09
CDS	peg.515	Q7A_528	539030	540043	1014	-	MxaL protein	MxaL protein; AFI83374.1	52377	32654	50385	50702	37378	78002	10135	7711	5608	CDS	peg.500	514337	515350	1014	-	MxaL protein	CDW43_RS02390	CDW43_RS02390	VWA domain-containing protein	VWA domain-containing protein			14691	12077	44393	13549	28441	21602	16401	5971	624		51653.8	32203.2	49689.3	50002	36861.9	76925	9995.07	7604.54	5530.57
CDS	peg.516	Q7A_529	540055	540624	570	-	MxaK protein	MxaK protein; AFI83375.1	36770	20957	32756	30352	23413	49482	5405	4212	2863	CDS	peg.501	515362	515931	570	-	MxaK protein	CDW43_RS02395	#N/A	MxaK protein	#N/A			9437	7926	29629	9474	19982	14063	7569	2898	407		64508.8	36766.7	57466.7	53249.1	41075.4	86810.5	9482.46	7389.47	5022.81
CDS	peg.517	Q7A_530	540624	541445	822	-	MxaC, protein involved in Ca2+ insertion into methanol dehydrogenase	VWA domain-containing protein; AFI83376.2	34470	19858	30208	33819	28258	53590	7753	6863	4924	CDS	peg.502	515931	516752	822	-	MxaC, protein involved in Ca2+ insertion into methanol dehydrogenase	CDW43_RS02400	#N/A	VWA domain-containing protein	#N/A			8362	6928	26709	9573	18349	12221	14175	5801	765		41934.3	24158.2	36749.4	41142.3	34377.1	65194.6	9431.87	8349.15	5990.27
CDS	peg.518	Q7A_531	541598	542563	966	-	MxaA protein	hypothetical protein; AFI83377.1	42457	29424	42283	40872	29022	67966	8734	8138	6782	CDS	peg.503	516905	517870	966	-	MxaA protein	CDW43_RS02405	CDW43_RS02405	hypothetical protein	hypothetical protein			10695	8955	44956	15463	30834	21313	16073	6815	1223		43951.3	30459.6	43771.2	42310.6	30043.5	70358.2	9041.41	8424.43	7020.7
CDS	peg.519	Q7A_532	542553	543386	834	-	hypothetical protein	hypothetical protein; AFI83378.1	51936	41446	58331	62858	42547	104934	12396	11471	8749	CDS	peg.504	517860	518693	834	-	hypothetical protein	CDW43_RS02410	CDW43_RS02410	hypothetical protein	hypothetical protein			12408	12565	65743	26641	50550	36120	18548	8590	1614		62273.4	49695.4	69941.2	75369.3	51015.6	125820	14863.3	13754.2	10490.4
CDS	peg.520	Q7A_533	543383	544417	1035	-	Methanol dehydrogenase regulatory protein MoxR	MoxR family ATPase; AFI83379.1	102584	80912	117052	115586	79585	190479	30761	27213	19248	CDS	peg.505	518690	519724	1035	-	Methanol dehydrogenase regulatory protein MoxR	CDW43_RS02415	CDW43_RS02415	MoxR family ATPase	MoxR family ATPase			23294	23332	150025	75339	128401	79430	33302	17174	3516		99115	78175.8	113094	111677	76893.7	184038	29720.8	26292.8	18597.1
CDS	peg.521	Q7A_534	544501	544776	276	-	Methanol dehydrogenase, small subunit (EC 1.1.99.8)	methanol dehydrogenase; AFI83380.1	347976	253677	307079	167775	173606	374112	110803	101466	62064	CDS	peg.506	519808	520083	276	-	Methanol dehydrogenase, small subunit (EC 1.1.99.8)	CDW43_RS02420	CDW43_RS02420	methanol dehydrogenase [cytochrome c] subunit	methanol dehydrogenase [cytochrome c] subunit			97528	84027	322869	215548	343989	164112	85035	70302	24443		1.26078e+06	919120	1.11261e+06	607880	629007	1.35548e+06	401460	367630	224870
CDS	peg.522	Q7A_535	544908	545450	543	-	Cytochrome c-L precursor (Cytochrome c551I) (Cytochrome c552)	cytochrome c(L)%2C periplasmic; AFI83381.1	173353	128195	174760	119814	98140	244184	87827	71635	45128	CDS	peg.507	520215	520799	585	-	Cytochrome c-L precursor (Cytochrome c551I) (Cytochrome c552)	CDW43_RS02425	CDW43_RS02425	cytochrome c(L), periplasmic	cytochrome c(L), periplasmic			36841	37999	222337	100678	172739	94925	70940	48476	8457		319250	236087	321842	220652	180737	449694	161744	131924	83108.7
CDS	peg.523	Q7A_536	545540	546409	870	-	MxaJ, protein involved in methanol oxidation	methanol oxidation system protein MoxJ; AFI83382.1	392608	295068	418019	331173	240807	581325	181852	150639	94857	CDS	peg.508	520847	521716	870	-	MxaJ, protein involved in methanol oxidation	CDW43_RS02430	#N/A	methanol oxidation system protein MoxJ	#N/A			77025	75252	498466	263184	408693	243278	112481	76479	16313		451274	339159	480482	380659	276790	668190	209025	173148	109031
CDS	peg.524	Q7A_537	546514	548400	1887	-	Methanol dehydrogenase large subunit protein (EC 1.1.99.8)	PQQ-dependent dehydrogenase%2C methanol/ethanol family; AFI83383.1	2636752	1902318	2406405	1775177	1601669	3007905	1049645	932987	529693	CDS	peg.509	521821	523707	1887	-	Methanol dehydrogenase large subunit protein (EC 1.1.99.8)	CDW43_RS02435	CDW43_RS02435	methanol/ethanol family PQQ-dependent dehydrogenase	methanol/ethanol family PQQ-dependent dehydrogenase			729161	645973	2559311	1587346	2428479	1305511	512051	450380	161352		1.39732e+06	1.00812e+06	1.27525e+06	940740	848791	1.59401e+06	556251	494429	280706
CDS	peg.525	Q7A_538	548605	549258	654	-	Nitrate/nitrite response regulator protein	DNA-binding response regulator; AFI83384.1	44199	35253	49442	55214	34219	71287	43758	50251	46708	CDS	peg.510	523912	524565	654	-	Nitrate/nitrite response regulator protein	CDW43_RS02440	CDW43_RS02440	response regulator transcription factor	response regulator transcription factor			11416	11427	59717	29048	50693	31834	24980	25088	2456		67582.6	53903.7	75599.4	84425.1	52322.6	109002	66908.3	76836.4	71419
CDS	peg.526	Q7A_539	549305	550276	972	-	two-component sensor histidine kinase	two-component sensor histidine kinase; AFI83385.1	28405	19182	26098	34967	26253	44879	33845	38779	40498	CDS	peg.511	524612	525580	969	-	two-component sensor histidine kinase	CDW43_RS02445	#N/A	sensor histidine kinase	#N/A			9567	8089	32840	27369	37899	20495	18185	23342	2613		29223.3	19734.6	26849.8	35974.3	27009.3	46171.8	34820	39896.1	41664.6
CDS	peg.527	Q7A_540	550499	550831	333	+	hypothetical protein	hypothetical protein; AFI83386.1	11468	9312	13538	6606	5338	13155	7163	5463	3950	CDS	peg.512	525806	526138	333	+	hypothetical protein	CDW43_RS02450	CDW43_RS02450	hypothetical protein	hypothetical protein			3923	4480	15980	5495	10922	5848	11649	8985	3496		34438.4	27964	40654.7	19837.8	16030	39504.5	21510.5	16405.4	11861.9
CDS	peg.528	Q7A_541	550861	551385	525	+	MxaD protein	SRPBCC family protein; AFI83387.1	45587	35891	48038	29422	26858	62965	34889	27854	22141	CDS	peg.513	526168	526692	525	+	MxaD protein	#N/A	CDW43_RS02455	#N/A	SRPBCC family protein			19837	19117	50054	17579	31587	19936	35066	26453	12113		86832.4	68363.8	91501	56041.9	51158.1	119933	66455.2	53055.2	42173.3
CDS	peg.529	Q7A_542	551392	552327	936	+	hypothetical protein	hypothetical protein; AFI83388.1	77458	62604	87104	64834	51323	123785	46616	39916	32875	CDS	peg.514	526699	527634	936	+	hypothetical protein	CDW43_RS02460	CDW43_RS02460	YncE family protein	YncE family protein			26640	25610	86931	28438	55544	38564	41411	26919	8737		82754.3	66884.6	93059.8	69267.1	54832.3	132249	49803.4	42645.3	35122.9
CDS	peg.530	Q7A_543	552360	552824	465	-	tRNA (cytidine(34)-2'-O)-methyltransferase (EC 2.1.1.207)	tRNA (uridine(34)/cytosine(34)/5-carboxymethylaminomethyluridine(34)-2'-O)-methyltransferase TrmL; AFI83389.1	25320	14952	24821	21456	17302	35559	10374	9578	10398	CDS	peg.515	527667	528131	465	-	tRNA (cytidine(34)-2'-O)-methyltransferase (EC 2.1.1.207)	CDW43_RS02465	CDW43_RS02465	tRNA (uridine(34)/cytosine(34)/5-carboxymethylaminomethyluridine(34)-2'-O)-methyltransferase TrmL	tRNA (uridine(34)/cytosine(34)/5-carboxymethylaminomethyluridine(34)-2'-O)-methyltransferase TrmL			8243	6920	21068	8235	15335	10577	11258	7669	1622		54451.6	32154.8	53378.5	46141.9	37208.6	76471	22309.7	20597.8	22361.3
CDS	peg.531	Q7A_544	552827	554434	1608	-	Membrane-bound lytic murein transglycosylase D precursor (EC 3.2.1.-)	lytic transglycosylase; AFI83390.1	35140	22926	33849	29077	23481	45795	22167	22747	27881	CDS	peg.516	528134	529741	1608	-	Membrane-bound lytic murein transglycosylase D precursor (EC 3.2.1.-)	CDW43_RS02470	CDW43_RS02470	LysM peptidoglycan-binding domain-containing protein	LysM peptidoglycan-binding domain-containing protein			11785	10117	30080	15782	25677	15905	21217	18659	3198		21853.2	14257.5	21050.4	18082.7	14602.6	28479.5	13785.4	14146.1	17338.9
CDS	peg.532	#N/A	554743	555546	804	+	hypothetical protein	#N/A	5880	3107	4899	5792	6674	9516	17409	21640	28646	CDS	peg.517	530050	530853	804	+	hypothetical protein	CDW43_RS02475	CDW43_RS02475	DUF2797 domain-containing protein	DUF2797 domain-containing protein			2811	2037	5779	5694	6642	3173	5994	7914	1654		7313.43	3864.43	6093.28	7203.98	8301	11835.8	21653	26915.4	35629.4
CDS	peg.533	Q7A_546	555552	556571	1020	+	Dihydroorotate dehydrogenase (EC 1.3.3.1)	dihydroorotate dehydrogenase (quinone); AFI83392.1	9507	6424	9496	10928	10027	15038	11466	12930	16155	CDS	peg.518	530859	531878	1020	+	Dihydroorotate dehydrogenase (EC 1.3.3.1)	#N/A	CDW43_RS02480	#N/A	quinone-dependent dihydroorotate dehydrogenase			4340	3626	9179	7611	10495	5815	3947	5336	1019		9320.59	6298.04	9309.8	10713.7	9830.39	14743.1	11241.2	12676.5	15838.2
CDS	peg.534	Q7A_547	556573	557412	840	+	Small-conductance mechanosensitive channel	mechanosensitive ion channel protein MscS; AFI83393.1	13181	10171	13685	14524	12745	20725	10238	11158	12931	CDS	peg.519	531880	532719	840	+	Small-conductance mechanosensitive channel	CDW43_RS02485	CDW43_RS02485	mechanosensitive ion channel	mechanosensitive ion channel			6423	5592	13459	9930	14470	8454	5155	5656	1406		15691.7	12108.3	16291.7	17290.5	15172.6	24672.6	12188.1	13283.3	15394
CDS	peg.535	Q7A_548	557425	558195	771	-	Hydroxyacylglutathione hydrolase (EC 3.1.2.6)	hydroxyacylglutathione hydrolase; AFI83394.1	8249	5638	7888	10130	8984	12626	6469	7198	8732	CDS	peg.520	532732	533502	771	-	Hydroxyacylglutathione hydrolase (EC 3.1.2.6)	CDW43_RS02490	CDW43_RS02490	hydroxyacylglutathione hydrolase	hydroxyacylglutathione hydrolase			3833	3009	7765	8909	10752	5523	4512	4962	941		10699.1	7312.58	10230.9	13138.8	11652.4	16376.1	8390.4	9335.93	11325.6
CDS	peg.536	Q7A_549	558219	558944	726	+	FIG005121: SAM-dependent methyltransferase (EC 2.1.1.-)	methylase; AFI83395.1	9041	5323	7954	9844	9425	13071	7410	7030	8712	CDS	peg.521	533526	534251	726	+	FIG005121: SAM-dependent methyltransferase (EC 2.1.1.-)	CDW43_RS02495	CDW43_RS02495	methyltransferase domain-containing protein	methyltransferase domain-containing protein			3458	2797	7576	9316	10952	5214	4185	5088	920		12453.2	7331.96	10955.9	13559.2	12982.1	18004.1	10206.6	9683.2	12000
CDS	peg.537	Q7A_550	558944	559387	444	+	Ribonuclease HI (EC 3.1.26.4)	ribonuclease HI; AFI83396.1	8452	5497	8330	9540	7920	12534	3808	2858	3704	CDS	peg.522	534251	534694	444	+	Ribonuclease HI (EC 3.1.26.4)	CDW43_RS02500	CDW43_RS02500	ribonuclease HI	ribonuclease HI			3164	2693	6752	6630	8513	4686	2281	2978	317		19036	12380.6	18761.3	21486.5	17837.8	28229.7	8576.58	6436.94	8342.34
CDS	peg.538	Q7A_551	559391	560122	732	+	DNA polymerase III epsilon subunit (EC 2.7.7.7)	DNA polymerase III subunit epsilon; AFI83397.1	4989	3376	5222	6111	5137	9318	5192	5598	6862	CDS	peg.523	534698	535429	732	+	DNA polymerase III epsilon subunit (EC 2.7.7.7)	CDW43_RS02505	CDW43_RS02505	DNA polymerase III subunit epsilon	DNA polymerase III subunit epsilon			1757	1633	4592	3830	5743	3016	3615	4226	632		6815.57	4612.02	7133.88	8348.36	7017.76	12729.5	7092.9	7647.54	9374.32
CDS	peg.539	Q7A_552	560219	560776	558	+	Heat shock protein GrpE	nucleotide exchange factor GrpE; AFI83398.1	6685	5797	7766	3814	5777	12603	5900	7042	11092	CDS	peg.524	535526	536083	558	+	Heat shock protein GrpE	CDW43_RS02510	CDW43_RS02510	nucleotide exchange factor GrpE	nucleotide exchange factor GrpE			5054	4033	6752	1832	3042	1871	3739	6583	2599		11980.3	10388.9	13917.6	6835.13	10353	22586	10573.5	12620.1	19878.1
CDS	peg.540	Q7A_553	560877	562799	1923	+	Chaperone protein DnaK	molecular chaperone DnaK; AFI83399.1	125483	104077	132040	76775	112863	194129	178084	238654	447935	CDS	peg.525	536184	538106	1923	+	Chaperone protein DnaK	CDW43_RS02515	CDW43_RS02515	molecular chaperone DnaK	molecular chaperone DnaK			75313	57738	130562	41314	62112	42797	43814	114605	34281		65253.8	54122.2	68663.5	39924.6	58691.1	100951	92607.4	124105	232936
CDS	peg.541	Q7A_554	562881	563993	1113	+	Chaperone protein DnaJ	molecular chaperone DnaJ; AFI83400.1	33738	23650	33954	22721	25247	48089	26442	36248	61038	CDS	peg.526	538188	539300	1113	+	Chaperone protein DnaJ	CDW43_RS02520	CDW43_RS02520	molecular chaperone DnaJ	molecular chaperone DnaJ			17356	13869	34556	8653	16253	11675	8760	17044	2728		30312.7	21248.9	30506.7	20414.2	22683.7	43206.6	23757.4	32567.8	54841
CDS	peg.542	Q7A_555	564078	564887	810	+	4-hydroxy-tetrahydrodipicolinate reductase (EC 1.17.1.8)	4-hydroxy-tetrahydrodipicolinate reductase; AFI83401.1	15803	9912	15930	9404	9253	20263	5110	6101	10529	CDS	peg.527	539386	540195	810	+	4-hydroxy-tetrahydrodipicolinate reductase (EC 1.17.1.8)	CDW43_RS02525	CDW43_RS02525	4-hydroxy-tetrahydrodipicolinate reductase	4-hydroxy-tetrahydrodipicolinate reductase			6961	5667	14141	3578	7046	4931	4217	4583	1309		19509.9	12237	19666.7	11609.9	11423.5	25016	6308.64	7532.1	12998.8
CDS	peg.543	Q7A_556	564888	565274	387	-	FOG: TPR repeat	hypothetical protein; AFI83402.2	7145	4189	6764	4397	4306	8675	1865	2099	3134	CDS	peg.528	540196	540582	387	-	FOG: TPR repeat	CDW43_RS02530	#N/A	hypothetical protein	#N/A			3146	2421	5015	1812	3297	2225	1439	1374	346		18462.5	10824.3	17478	11361.8	11126.6	22416	4819.12	5423.77	8098.19
CDS	peg.544	#N/A	565273	565500	228	+	hypothetical protein	#N/A	2117	1097	1965	1368	1275	2544	1591	1662	2647	CDS	peg.529	540581	540808	228	+	hypothetical protein	#N/A	#N/A	#N/A	#N/A			702	570	1294	646	1066	788	1250	1434	259		9285.09	4811.4	8618.42	6000	5592.11	11157.9	6978.07	7289.47	11609.6
CDS	peg.545	Q7A_558	565468	567702	2235	-	Multimodular transpeptidase-transglycosylase (EC 2.4.1.129) (EC 3.4.-.-)	penicillin-binding protein 1B; AFI83404.2	9682	5620	9036	6118	5172	10779	6418	5968	8114	CDS	peg.530	540776	543130	2355	-	Multimodular transpeptidase-transglycosylase (EC 2.4.1.129) (EC 3.4.-.-)	CDW43_RS02535	CDW43_RS02535	penicillin-binding protein 1B	penicillin-binding protein 1B			3367	2813	7833	3788	6091	3900	9044	7238	873		4331.99	2514.54	4042.95	2737.36	2314.09	4822.82	2871.59	2670.25	3630.43
CDS	peg.546	Q7A_559	568049	569365	1317	+	putative membrane protein	thymidylate kinase; AFI83405.1	34227	23972	35901	20899	19149	41499	14872	10574	9165	CDS	peg.531	543358	544674	1317	+	putative membrane protein	CDW43_RS02540	CDW43_RS02540	YjgN family protein	YjgN family protein			15754	13354	29502	17799	28080	17120	22006	19560	4870		25988.6	18202	27259.7	15868.6	14539.9	31510.3	11292.3	8028.85	6959
CDS	peg.547	Q7A_560	569368	570525	1158	+	Zn-dependent protease with chaperone function	peptidase M48 Ste24p; AFI83406.1	32159	20086	32848	18137	15088	36556	4758	3003	2694	CDS	peg.532	544677	545834	1158	+	Zn-dependent protease with chaperone function	CDW43_RS02545	CDW43_RS02545	M48 family metallopeptidase	M48 family metallopeptidase			11659	9808	30203	14324	25632	16655	7669	4963	1474		27771.2	17345.4	28366.1	15662.3	13029.4	31568.2	4108.81	2593.26	2326.42
CDS	peg.548	Q7A_561	570721	571275	555	+	PPO candidate 1	thioredoxin family protein; AFI83407.1	37334	23519	37447	22212	18997	41098	24929	16360	14645	CDS	peg.533	546030	546584	555	+	PPO candidate 1	CDW43_RS02550	CDW43_RS02550	thioredoxin family protein	thioredoxin family protein			10460	9963	32142	11941	21453	13172	42361	27389	4474		67268.5	42376.6	67472.1	40021.6	34228.8	74050.5	44917.1	29477.5	26387.4
CDS	peg.549	Q7A_562	571302	573290	1989	+	Transketolase (EC 2.2.1.1)	transketolase; AFI83408.1	330567	216022	317448	182070	168312	366276	109213	57793	38762	CDS	peg.534	546611	548599	1989	+	Transketolase (EC 2.2.1.1)	CDW43_RS02555	CDW43_RS02555	transketolase	transketolase			111074	103747	245897	85844	166148	104364	164685	87097	30129		166198	108608	159602	91538.5	84621.4	184151	54908.5	29056.3	19488.2
CDS	peg.550	Q7A_563	573502	574500	999	+	NAD-dependent glyceraldehyde-3-phosphate dehydrogenase (EC 1.2.1.12)	type I glyceraldehyde-3-phosphate dehydrogenase; AFI83409.1	57120	36534	53606	30882	26498	57594	6372	4387	3263	CDS	peg.535	548811	549809	999	+	NAD-dependent glyceraldehyde-3-phosphate dehydrogenase (EC 1.2.1.12)	CDW43_RS02560	CDW43_RS02560	type I glyceraldehyde-3-phosphate dehydrogenase	type I glyceraldehyde-3-phosphate dehydrogenase			18866	17012	43127	18414	34350	22441	12934	7686	2604		57177.2	36570.6	53659.7	30912.9	26524.5	57651.7	6378.38	4391.39	3266.27
CDS	peg.551	Q7A_564	574620	575804	1185	+	Phosphoglycerate kinase (EC 2.7.2.3)	phosphoglycerate kinase; AFI83410.1	29453	20340	27183	17177	19618	31270	10675	10680	8441	CDS	peg.536	549929	551113	1185	+	Phosphoglycerate kinase (EC 2.7.2.3)	CDW43_RS02565	CDW43_RS02565	phosphoglycerate kinase	phosphoglycerate kinase			11716	9384	19029	15573	20962	10367	9465	8559	3369		24854.9	17164.6	22939.2	14495.4	16555.3	26388.2	9008.44	9012.66	7123.21
CDS	peg.552	Q7A_565	575823	577288	1466	+	Pyruvate kinase (EC 2.7.1.40)	pyruvate kinase;pseudo=true	24350	15860	22020	16367	16308	28342	6712	6816	5472	CDS	peg.537	551132	552598	1467	+	Pyruvate kinase (EC 2.7.1.40)	CDW43_RS02570	CDW43_RS02570	pyruvate kinase	pyruvate kinase			9515	7917	17946	14513	19834	10800	5787	5917	1489		16609.8	10818.6	15020.5	11164.4	11124.1	19332.9	4578.44	4649.39	3732.61
CDS	peg.553	Q7A_566	577313	578383	1071	+	Fructose-bisphosphate aldolase class II (EC 4.1.2.13)	fructose-1%2C6-bisphosphate aldolase; AFI83412.1	15062	9956	13810	10514	10116	16941	5366	5678	5009	CDS	peg.538	552623	553693	1071	+	Fructose-bisphosphate aldolase class II (EC 4.1.2.13)	CDW43_RS02575	CDW43_RS02575	fructose-bisphosphate aldolase class II	fructose-bisphosphate aldolase class II			5881	4642	12191	14166	17216	8859	4664	4923	1366		14063.5	9295.99	12894.5	9816.99	9445.38	15817.9	5010.27	5301.59	4676.94
CDS	peg.554	Q7A_567	578526	578900	375	+	CrcB protein	camphor resistance protein CrcB; AFI83413.2	7499	3554	5543	5419	5012	9176	5782	4669	4361	CDS	peg.539	553836	554210	375	+	CrcB protein	CDW43_RS02580	CDW43_RS02580	fluoride efflux transporter CrcB	fluoride efflux transporter CrcB			2802	1931	5286	4492	6482	2796	3653	3506	667		19997.3	9477.33	14781.3	14450.7	13365.3	24469.3	15418.7	12450.7	11629.3
CDS	peg.555	Q7A_568	578897	579187	291	+	hypothetical protein	hypothetical protein; AFI83414.1	5618	3118	4696	5241	4080	8134	4291	3182	3278	CDS	peg.540	554207	554497	291	+	hypothetical protein	CDW43_RS02585	CDW43_RS02585	DUF190 domain-containing protein	DUF190 domain-containing protein			1617	1424	4528	3420	4757	2439	2880	2946	513		19305.8	10714.8	16137.5	18010.3	14020.6	27951.9	14745.7	10934.7	11264.6
CDS	peg.556	Q7A_569	579189	580463	1275	+	Seryl-tRNA synthetase (EC 6.1.1.11)	serine--tRNA ligase; AFI83415.1	30305	17165	26520	26063	22619	38697	22716	17061	14959	CDS	peg.541	554499	555773	1275	+	Seryl-tRNA synthetase (EC 6.1.1.11)	CDW43_RS02590	CDW43_RS02590	serine--tRNA ligase	serine--tRNA ligase			10892	9054	20495	13927	21902	11320	15333	14826	2513		23768.6	13462.7	20800	20441.6	17740.4	30350.6	17816.5	13381.2	11732.5
CDS	peg.557	Q7A_570	580456	581136	681	+	FIG004556: membrane metalloprotease	site-2 protease family protein; AFI83416.1	17330	8436	14282	11925	9741	18465	8277	5982	5534	CDS	peg.542	555766	556446	681	+	FIG004556: membrane metalloprotease	CDW43_RS02595	CDW43_RS02595	site-2 protease family protein	site-2 protease family protein			6371	4720	11701	5751	9653	5823	5512	4918	869		25447.9	12387.7	20972.1	17511	14304	27114.5	12154.2	8784.14	8126.28
CDS	peg.558	Q7A_571	581172	582389	1218	+	Tryptophanyl-tRNA synthetase (EC 6.1.1.2)	tryptophan--tRNA ligase; AFI83417.2	25091	16165	24394	19717	15323	31486	14154	10429	9459	CDS	peg.543	556482	557699	1218	+	Tryptophanyl-tRNA synthetase (EC 6.1.1.2)	CDW43_RS02600	CDW43_RS02600	tryptophan--tRNA ligase	tryptophan--tRNA ligase			8513	7236	21788	11055	17876	10096	10666	9831	1624		20600.2	13271.8	20027.9	16188	12580.5	25850.6	11620.7	8562.4	7766.01
CDS	peg.559	Q7A_572	582407	583327	921	+	Ribosomal large subunit pseudouridine synthase B (EC 4.2.1.70)	23S rRNA pseudouridylate synthase B; AFI83418.1	20882	13546	19556	15441	12976	26255	12132	9272	8476	CDS	peg.544	557717	558637	921	+	Ribosomal large subunit pseudouridine synthase B (EC 4.2.1.70)	CDW43_RS02605	CDW43_RS02605	pseudouridine synthase	pseudouridine synthase			6191	5817	17119	9198	14657	8388	9756	9624	1575		22673.2	14707.9	21233.4	16765.5	14089	28507.1	13172.6	10067.3	9203.04
CDS	peg.560	Q7A_573	583324	584250	927	-	GGDEF/response regulator receiver domain protein	GGDEF domain-containing protein; AFI83419.2	16045	11377	15522	13860	10960	21531	16931	14104	12849	CDS	peg.545	558634	559560	927	-	GGDEF/response regulator receiver domain protein	CDW43_RS02610	CDW43_RS02610	diguanylate cyclase	diguanylate cyclase			4318	4182	9692	5480	8463	5190	16208	31482	1476		17308.5	12272.9	16744.3	14951.5	11823.1	23226.5	18264.3	15214.7	13860.8
CDS	peg.561	Q7A_574	584340	585101	762	-	3-oxoacyl-[acyl-carrier protein] reductase (EC 1.1.1.100)	short-chain dehydrogenase; AFI83420.1	46356	33867	47439	62221	43262	85374	29141	26093	21561	CDS	peg.546	559650	560411	762	-	3-oxoacyl-[acyl-carrier protein] reductase (EC 1.1.1.100)	CDW43_RS02615	CDW43_RS02615	SDR family NAD(P)-dependent oxidoreductase	SDR family NAD(P)-dependent oxidoreductase			15258	14724	46847	39243	57165	31283	28765	30083	6749		60834.6	44444.9	62255.9	81654.9	56774.3	112039	38242.8	34242.8	28295.3
CDS	peg.562	Q7A_575	585111	585476	366	-	hypothetical protein	hypothetical protein; AFI83421.1	36113	22645	33265	32786	24976	48408	24704	22057	17528	CDS	peg.547	560421	560786	366	-	hypothetical protein	CDW43_RS02620	CDW43_RS02620	hypothetical protein	hypothetical protein			13768	11600	35629	28526	42404	21856	22352	24050	9269		98669.4	61871.6	90888	89579.2	68240.4	132262	67497.3	60265	47890.7
CDS	peg.563	Q7A_576	585689	586971	1283	-	Phytoene desaturase, pro-zeta-carotene producing (EC 1.-.-.-)	FAD-dependent oxidoreductase; AFI83422.2	13315	8486	13238	13676	10585	20557	10046	8536	8146	CDS	peg.548	560999	562282	1284	-	Phytoene desaturase, pro-zeta-carotene producing (EC 1.-.-.-)	CDW43_RS02625	#N/A	hydroxysqualene dehydroxylase HpnE	#N/A			4395	3753	11921	7269	11134	6663	8070	7828	1461		10378	6614.19	10318	10659.4	8250.19	16022.6	7830.09	6653.16	6349.18
CDS	peg.564	Q7A_577	586973	587830	858	-	Phytoene synthase (EC 2.5.1.32)	squalene synthase HpnD; AFI83423.1	17754	11578	18324	17161	11698	26722	6441	5533	5830	CDS	peg.549	562284	563141	858	-	Phytoene synthase (EC 2.5.1.32)	CDW43_RS02630	CDW43_RS02630	presqualene diphosphate synthase HpnD	presqualene diphosphate synthase HpnD			4856	4702	16112	9092	14758	8968	8593	6787	1416		20692.3	13494.2	21356.6	20001.2	13634	31144.5	7506.99	6448.72	6794.87
CDS	peg.565	Q7A_03230	587827	588129	303	-	Ferredoxin	2Fe-2S ferredoxin; ASF49062.1	6522	4843	7087	6245	4239	10139	3042	2622	2653	CDS	peg.550	563138	563440	303	-	Ferredoxin	CDW43_RS02635	CDW43_RS02635	(2Fe-2S) ferredoxin	(2Fe-2S) ferredoxin			1932	1804	5885	3417	5427	3227	4558	3663	730		21524.8	15983.5	23389.4	20610.6	13990.1	33462	10039.6	8653.47	8755.78
CDS	peg.566	Q7A_579	588185	589153	969	-	Octaprenyl diphosphate synthase (EC 2.5.1.90) / Dimethylallyltransferase (EC 2.5.1.1) / (2E,6E)-farnesyl diphosphate synthase (EC 2.5.1.10) / Geranylgeranyl pyrophosphate synthetase (EC 2.5.1.29)	octaprenyl diphosphate synthase; AFI83425.1	23717	15496	22930	18135	14569	29944	9278	7413	6740	CDS	peg.551	563496	564464	969	-	Octaprenyl diphosphate synthase (EC 2.5.1.90) / Dimethylallyltransferase (EC 2.5.1.1) / (2E,6E)-farnesyl diphosphate synthase (EC 2.5.1.10) / Geranylgeranyl pyrophosphate synthetase (EC 2.5.1.29)	CDW43_RS02640	CDW43_RS02640	octaprenyl diphosphate synthase	octaprenyl diphosphate synthase			7610	6878	18283	10636	17070	10016	14806	12512	2209		24475.7	15991.7	23663.6	18715.2	15035.1	30902	9574.82	7650.15	6955.62
CDS	peg.567	Q7A_580	589321	589632	312	+	LSU ribosomal protein L21p	50S ribosomal protein L21; AFI83426.1	60605	28462	46631	30269	25126	52431	31029	23484	23375	CDS	peg.552	564632	564943	312	+	LSU ribosomal protein L21p	CDW43_RS02645	CDW43_RS02645	50S ribosomal protein L21	50S ribosomal protein L21			20544	16206	31578	15361	26281	12411	50700	43652	6012		194247	91224.4	149458	97016	80532.1	168048	99451.9	75269.2	74919.9
CDS	peg.568	Q7A_581	589661	589918	258	+	LSU ribosomal protein L27p	50S ribosomal protein L27; AFI83427.1	26097	11581	19460	11673	10757	23053	13896	9867	10370	CDS	peg.553	564972	565229	258	+	LSU ribosomal protein L27p	CDW43_RS02650	CDW43_RS02650	50S ribosomal protein L27	50S ribosomal protein L27			10002	8264	15231	7033	12303	5975	30249	25049	3508		101151	44887.6	75426.4	45244.2	41693.8	89352.7	53860.5	38244.2	40193.8
CDS	peg.569	Q7A_582	589979	591064	1086	+	GTP-binding protein Obg	Obg family GTPase CgtA; AFI83428.2	23704	12868	21427	18250	13552	26021	8394	5422	5139	CDS	peg.554	565290	566375	1086	+	GTP-binding protein Obg	#N/A	CDW43_RS02655	#N/A	GTPase ObgE			9821	8605	20832	9175	15107	8705	15550	12726	1988		21826.9	11849	19730.2	16804.8	12478.8	23960.4	7729.28	4992.63	4732.04
CDS	peg.570	Q7A_583	591067	592197	1131	+	Glutamate 5-kinase (EC 2.7.2.11) / RNA-binding C-terminal domain PUA	glutamate 5-kinase; AFI83429.1	43092	23638	41101	39656	29372	53053	15943	13060	11619	CDS	peg.555	566378	567508	1131	+	Glutamate 5-kinase (EC 2.7.2.11) / RNA-binding C-terminal domain PUA	CDW43_RS02660	CDW43_RS02660	glutamate 5-kinase	glutamate 5-kinase			17136	14371	32901	19903	32823	19629	31287	25727	3748		38100.8	20900.1	36340.4	35062.8	25969.9	46908	14096.4	11547.3	10273.2
CDS	peg.571	Q7A_584	592260	592520	261	-	SSU ribosomal protein S20p	30S ribosomal protein S20; AFI83430.1	63485	29453	47905	45457	34803	64131	33958	24684	24872	CDS	peg.556	567571	567831	261	-	SSU ribosomal protein S20p	CDW43_RS02665	CDW43_RS02665	30S ribosomal protein S20	30S ribosomal protein S20			25683	21883	50225	33518	61116	30421	39496	36173	4229		243238	112847	183544	174165	133345	245713	130107	94574.7	95295
CDS	peg.572	Q7A_585	592628	593407	780	+	Exodeoxyribonuclease III (EC 3.1.11.2)	exodeoxyribonuclease III; AFI83431.2	3058	1880	2909	1952	1563	3420	2047	1582	1802	CDS	peg.557	567939	568718	780	+	Exodeoxyribonuclease III (EC 3.1.11.2)	CDW43_RS02670	CDW43_RS02670	exodeoxyribonuclease III	exodeoxyribonuclease III			1174	1169	2692	1265	2413	1352	4413	3105	684		3920.51	2410.26	3729.49	2502.56	2003.85	4384.62	2624.36	2028.21	2310.26
CDS	peg.573	#N/A	593463	593630	168	+	hypothetical protein	#N/A	2540	1574	2144	1630	1422	2765	983	848	826	CDS	peg.558	568774	568941	168	+	hypothetical protein	CDW43_RS02675	CDW43_RS02675	DUF6435 family protein	DUF6435 family protein			936	788	2805	1783	2925	1383	1246	1065	219		15119	9369.05	12761.9	9702.38	8464.29	16458.3	5851.19	5047.62	4916.67
CDS	peg.574	Q7A_587	594470	596596	2127	-	ATP-dependent DNA helicase RecQ	DNA helicase RecQ; AFI83433.1	15423	9170	13735	15273	13026	21627	10513	9621	9193	CDS	peg.559	569781	571907	2127	-	ATP-dependent DNA helicase RecQ	CDW43_RS02680	CDW43_RS02680	DNA helicase RecQ	DNA helicase RecQ			6845	5406	11238	8831	14146	7429	7985	8085	1631		7251.06	4311.24	6457.45	7180.54	6124.12	10167.8	4942.64	4523.27	4322.05
CDS	peg.575	Q7A_588	596824	597180	357	+	hypothetical protein	hypothetical protein; AFI83434.1	684	522	654	415	405	828	1463	1400	1265	CDS	peg.560	572136	572492	357	+	hypothetical protein	CDW43_RS02685	CDW43_RS02685	hypothetical protein	hypothetical protein			310	279	1112	1059	1207	523	1541	1870	417		1915.97	1462.18	1831.93	1162.46	1134.45	2319.33	4098.04	3921.57	3543.42
CDS	peg.576	Q7A_589	597917	598264	348	+	expressed protein	cupin; AFI83435.1	2567	1416	2429	1571	1252	2762	2178	1819	2076	CDS	peg.561	573230	573577	348	+	expressed protein	CDW43_RS02695	CDW43_RS02695	cupin domain-containing protein	cupin domain-containing protein			1239	975	2975	2135	2887	1560	3129	3085	479		7376.44	4068.97	6979.89	4514.37	3597.7	7936.78	6258.62	5227.01	5965.52
CDS	peg.577	Q7A_590	598366	598626	261	-	transcriptional regulator, XRE family	transcriptional regulator; AFI83436.1	3216	1979	3083	4727	3796	4964	5120	5219	6595	CDS	peg.562	573680	573940	261	-	transcriptional regulator, XRE family	CDW43_RS02700	CDW43_RS02700	helix-turn-helix domain-containing protein	helix-turn-helix domain-containing protein			2438	1941	4260	5408	6359	3239	3556	5366	1121		12321.8	7582.38	11812.3	18111.1	14544.1	19019.2	19616.9	19996.2	25268.2
CDS	peg.578	Q7A_591	598628	598909	282	-	hypothetical protein	type II toxin-antitoxin system mRNA interferase toxin%2C RelE/StbE family; AFI83437.1	1744	851	1463	1131	1116	2030	2755	2715	3612	CDS	peg.563	573942	574223	282	-	hypothetical protein	CDW43_RS02705	#N/A	type II toxin-antitoxin system mRNA interferase toxin, RelE/StbE family	#N/A			1022	884	2029	2083	2319	1172	2431	3585	809		6184.4	3017.73	5187.94	4010.64	3957.45	7198.58	9769.5	9627.66	12808.5
CDS	peg.579	#N/A	599418	599543	126	+	hypothetical protein	#N/A	568	261	497	658	606	852	582	508	498	CDS	peg.564	574705	574857	153	+	hypothetical protein	#N/A	#N/A	#N/A	#N/A			445	309	489	403	597	322	464	468	70		4507.94	2071.43	3944.44	5222.22	4809.52	6761.9	4619.05	4031.75	3952.38
CDS	peg.580	Q7A_594	600947	602035	1089	-	DNA polymerase IV (EC 2.7.7.7)	DNA polymerase IV; AFI83440.1	2044	1113	1819	1487	1266	2541	1342	1321	1238	CDS	peg.566	576261	577349	1089	-	DNA polymerase IV (EC 2.7.7.7)	CDW43_RS02720	CDW43_RS02720	DNA polymerase IV	DNA polymerase IV			710	636	1531	1403	1722	1011	2015	2020	267		1876.95	1022.04	1670.34	1365.47	1162.53	2333.33	1232.32	1213.04	1136.82
CDS	peg.581	#N/A	602048	602164	117	+	hypothetical protein	#N/A	349	187	331	244	266	429	297	261	252	CDS	peg.567	577362	577478	117	+	hypothetical protein	#N/A	#N/A	#N/A	#N/A			170	87	337	346	419	196	425	429	97		2982.91	1598.29	2829.06	2085.47	2273.5	3666.67	2538.46	2230.77	2153.85
CDS	peg.582	Q7A_596	602270	603895	1626	+	AmpG permease	MFS transporter; AFI83442.2	12238	6968	11675	10878	8769	15920	6134	4879	4345	CDS	peg.568	577584	579209	1626	+	AmpG permease	#N/A	CDW43_RS02725	#N/A	MFS transporter			4880	3734	10895	6818	11131	6347	5714	5606	1120		7526.45	4285.36	7180.2	6690.04	5392.99	9790.9	3772.45	3000.62	2672.2
CDS	peg.583	Q7A_597	603907	604497	591	+	hypothetical protein putative signal peptide	hypothetical protein; AFI83443.1	4538	2675	4290	3881	3120	5772	1588	1151	1177	CDS	peg.569	579221	579811	591	+	hypothetical protein putative signal peptide	CDW43_RS02730	CDW43_RS02730	hypothetical protein	hypothetical protein			1591	1232	3682	1697	2813	1924	2027	1593	313		7678.51	4526.23	7258.88	6566.84	5279.19	9766.5	2686.97	1947.55	1991.54
CDS	peg.584	Q7A_598	604584	604967	384	+	Permeases of the major facilitator superfamily	nuclear transport factor 2 family protein; AFI83444.1	13199	8406	12286	12595	8857	16272	7822	6631	5734	CDS	peg.570	579898	580281	384	+	Permeases of the major facilitator superfamily	CDW43_RS02735	CDW43_RS02735	nuclear transport factor 2 family protein	nuclear transport factor 2 family protein			4752	3998	11898	16531	20513	9695	6313	5524	2417		34372.4	21890.6	31994.8	32799.5	23065.1	42375	20369.8	17268.2	14932.3
CDS	peg.585	Q7A_599	604989	606350	1362	-	Decarboxylase family protein	LOG family protein; AFI83445.1	25020	16091	24050	23860	17634	33640	11870	10551	9785	CDS	peg.571	580303	581664	1362	-	Decarboxylase family protein	CDW43_RS02740	CDW43_RS02740	nucleotide 5'-monophosphate nucleosidase PpnN	nucleotide 5'-monophosphate nucleosidase PpnN			8972	7693	23182	17664	25167	14355	11929	11133	2494		18370	11814.2	17657.9	17518.4	12947.1	24699	8715.12	7746.7	7184.29
CDS	peg.586	Q7A_600	606500	606997	498	-	Single-stranded DNA-binding protein	single-stranded DNA-binding protein; AFI83446.1	15575	9992	14276	14216	13776	22585	8919	7096	6221	CDS	peg.572	581814	582311	498	-	Single-stranded DNA-binding protein	CDW43_RS02745	CDW43_RS02745	single-stranded DNA-binding protein	single-stranded DNA-binding protein			5937	5334	15681	14457	19200	9633	8789	9336	2751		31275.1	20064.3	28666.7	28546.2	27662.7	45351.4	17909.6	14249	12492
CDS	peg.587	Q7A_601	607037	608422	1386	-	Putative transport protein	MFS transporter; AFI83447.1	11125	6441	10400	7743	6642	14328	6537	5394	5203	CDS	peg.573	582351	583736	1386	-	Putative transport protein	CDW43_RS02750	CDW43_RS02750	MFS transporter	MFS transporter			4038	3097	8364	5530	8257	4279	9800	8902	1333		8026.7	4647.19	7503.61	5586.58	4792.21	10337.7	4716.45	3891.77	3753.97
CDS	peg.588	Q7A_602	608473	611292	2820	+	Excinuclease ABC subunit A	excinuclease ABC subunit A; AFI83448.1	30606	18353	28872	28714	23358	41826	15622	11138	9572	CDS	peg.574	583787	586606	2820	+	Excinuclease ABC subunit A	CDW43_RS02755	CDW43_RS02755	excinuclease ABC subunit UvrA	excinuclease ABC subunit UvrA			12249	10072	26928	16793	25141	14048	13078	12507	2861		10853.2	6508.16	10238.3	10182.3	8282.98	14831.9	5539.72	3949.65	3394.33
CDS	peg.589	Q7A_603	611289	611912	624	+	Adenylate cyclase (EC 4.6.1.1)	CYTH domain-containing protein; AFI83449.1	10014	6326	9239	10643	9463	16204	6238	5048	3985	CDS	peg.575	586603	587226	624	+	Adenylate cyclase (EC 4.6.1.1)	CDW43_RS02760	CDW43_RS02760	CYTH domain-containing protein	CYTH domain-containing protein			3170	2663	7325	7302	9282	4548	3919	4173	1304		16048.1	10137.8	14806.1	17056.1	15165.1	25967.9	9996.79	8089.74	6386.22
CDS	peg.590	Q7A_604	611917	612963	1047	-	Ferric siderophore transport system, periplasmic binding protein TonB	energy transducer TonB; AFI83450.1	7803	5357	8392	8812	6832	13120	3520	2802	2641	CDS	peg.576	587231	588277	1047	-	Ferric siderophore transport system, periplasmic binding protein TonB	CDW43_RS02765	CDW43_RS02765	energy transducer TonB	energy transducer TonB			2228	2084	6592	4917	6773	4197	3400	3065	658		7452.72	5116.52	8015.28	8416.43	6525.31	12531	3361.99	2676.22	2522.45
CDS	peg.591	Q7A_605	612968	614014	1047	-	Thiamin biosynthesis lipoprotein ApbE	thiamine biosynthesis protein ApbE; AFI83451.1	7891	4646	7062	6424	5808	9808	4678	3779	3568	CDS	peg.577	588282	589328	1047	-	Thiamin biosynthesis lipoprotein ApbE	CDW43_RS02770	CDW43_RS02770	FAD:protein FMN transferase	FAD:protein FMN transferase			2960	2601	6015	4166	6328	3398	4260	3622	734		7536.77	4437.44	6744.99	6135.63	5547.28	9367.72	4468	3609.36	3407.83
CDS	peg.592	Q7A_606	614011	614955	945	-	Glutathione synthetase (EC 6.3.2.3)	glutathione synthase; AFI83452.1	6194	3832	5674	5546	4526	8275	5597	4607	4173	CDS	peg.578	589325	590269	945	-	Glutathione synthetase (EC 6.3.2.3)	CDW43_RS02775	CDW43_RS02775	glutathione synthase	glutathione synthase			2445	1984	4557	2986	4452	2537	5327	4643	843		6554.5	4055.03	6004.23	5868.78	4789.42	8756.61	5922.75	4875.13	4415.87
CDS	peg.593	Q7A_607	615135	616064	930	+	Glycyl-tRNA synthetase alpha chain (EC 6.1.1.14)	glycine--tRNA ligase subunit alpha; AFI83453.1	13430	8316	12088	14210	11322	20411	14665	11079	11142	CDS	peg.579	590449	591378	930	+	Glycyl-tRNA synthetase alpha chain (EC 6.1.1.14)	CDW43_RS02780	CDW43_RS02780	glycine--tRNA ligase subunit alpha	glycine--tRNA ligase subunit alpha			4740	4368	11757	7541	12097	6356	13572	12863	1983		14440.9	8941.94	12997.8	15279.6	12174.2	21947.3	15768.8	11912.9	11980.6
CDS	peg.594	Q7A_608	616067	618145	2079	+	Glycyl-tRNA synthetase beta chain (EC 6.1.1.14)	glycine--tRNA ligase subunit beta; AFI83454.1	49866	30243	46910	59043	43962	74156	28642	21471	18855	CDS	peg.580	591381	593459	2079	+	Glycyl-tRNA synthetase beta chain (EC 6.1.1.14)	CDW43_RS02785	CDW43_RS02785	glycine--tRNA ligase subunit beta	glycine--tRNA ligase subunit beta			19662	16203	38089	22465	38584	21822	18860	17468	2906		23985.6	14546.9	22563.7	28399.7	21145.7	35669.1	13776.8	10327.6	9069.26
CDS	peg.595	Q7A_609	618155	618694	540	+	Histidinol-phosphatase (EC 3.1.3.15)	D-glycero-beta-D-manno-heptose-1%2C7-bisphosphate 7-phosphatase; AFI83455.1	17540	10797	16963	20413	14865	25669	7147	5088	4103	CDS	peg.581	593469	594008	540	+	Histidinol-phosphatase (EC 3.1.3.15)	CDW43_RS02790	CDW43_RS02790	D-glycero-beta-D-manno-heptose 1,7-bisphosphate 7-phosphatase	D-glycero-beta-D-manno-heptose 1,7-bisphosphate 7-phosphatase			6024	4877	14762	10413	16205	9273	4719	4261	782		32481.5	19994.4	31413	37801.9	27527.8	47535.2	13235.2	9422.22	7598.15
CDS	peg.596	Q7A_610	618694	619446	753	+	1-acyl-sn-glycerol-3-phosphate acyltransferase (EC 2.3.1.51)	1-acyl-sn-glycerol-3-phosphate acyltransferase; AFI83456.1	18439	11161	17197	19504	14457	27340	7600	4669	4073	CDS	peg.582	594008	594760	753	+	1-acyl-sn-glycerol-3-phosphate acyltransferase (EC 2.3.1.51)	CDW43_RS02795	CDW43_RS02795	1-acyl-sn-glycerol-3-phosphate acyltransferase	1-acyl-sn-glycerol-3-phosphate acyltransferase			6138	5503	16850	9344	15536	9243	5452	4682	698		24487.4	14822	22838	25901.7	19199.2	36308.1	10093	6200.53	5409.03
CDS	peg.597	Q7A_611	619433	621514	2082	+	response regulator receiver modulated diguanylate cyclase/phosphodiesterase with PAS/PAC sensor(s)	two-component system response regulator; AFI83457.1	39256	27823	40527	42140	30826	63173	16871	11907	10447	CDS	peg.583	594747	596828	2082	+	response regulator receiver modulated diguanylate cyclase/phosphodiesterase with PAS/PAC sensor(s)	CDW43_RS02800	CDW43_RS02800	EAL domain-containing protein	EAL domain-containing protein			12425	11450	39506	22801	37880	21830	21643	16460	3004		18854.9	13363.6	19465.4	20240.2	14806	30342.5	8103.27	5719.02	5017.77
CDS	peg.598	Q7A_612	621567	622448	882	-	Probable protease htpX homolog (EC 3.4.24.-)	zinc metalloprotease HtpX; AFI83458.1	7642	5908	7625	3202	3811	8472	2946	2578	3456	CDS	peg.584	596881	597762	882	-	Probable protease htpX homolog (EC 3.4.24.-)	CDW43_RS02805	CDW43_RS02805	protease HtpX	protease HtpX			3585	2718	7151	4118	5592	3347	4927	4683	1637		8664.4	6698.41	8645.12	3630.39	4320.86	9605.44	3340.14	2922.9	3918.37
CDS	peg.599	Q7A_613	622503	623459	957	-	COG1821 family protein	hypothetical protein; AFI83459.2	10295	6800	9266	7614	8291	13295	4170	4345	4359	CDS	peg.585	597817	598914	1098	-	COG1821 family protein	CDW43_RS02810	CDW43_RS02810	ATP-grasp domain-containing protein	ATP-grasp domain-containing protein			4656	3844	11443	13588	15529	7742	6809	6659	1678		10757.6	7105.54	9682.34	7956.11	8663.53	13892.4	4357.37	4540.23	4554.86
CDS	peg.600	Q7A_614	623625	624530	906	-	Methylene tetrahydromethanopterin dehydrogenase (EC 1.5.99.9)	methylenetetrahydromethanopterin dehydrogenase; AFI83460.1	25355	16845	24308	15996	15102	33516	8350	6936	6964	CDS	peg.586	598939	599844	906	-	Methylene tetrahydromethanopterin dehydrogenase (EC 1.5.99.9)	CDW43_RS02815	CDW43_RS02815	methylenetetrahydromethanopterin dehydrogenase	methylenetetrahydromethanopterin dehydrogenase			7416	6783	20780	9223	15827	9753	10563	7233	2029		27985.7	18592.7	26830	17655.6	16668.9	36993.4	9216.34	7655.63	7686.53
CDS	peg.601	Q7A_615	624564	625583	1020	-	beta-ribofuranosylaminobenzene 5'-phosphate synthase	beta-hydroxylase; AFI83461.1	25855	16329	25451	18347	14734	33055	6756	5654	6231	CDS	peg.587	599878	600888	1011	-	beta-ribofuranosylaminobenzene 5'-phosphate synthase	CDW43_RS02820	CDW43_RS02820	beta-hydroxylase	beta-hydroxylase			7903	7412	22864	10078	17701	10949	12633	9129	1965		25348	16008.8	24952	17987.3	14445.1	32406.9	6623.53	5543.14	6108.82
CDS	peg.602	Q7A_616	625592	626476	885	-	Methylene tetrahydromethanopterin dehydrogenase (EC 1.5.99.9)	methylenetetrahydrofolate dehydrogenase; AFI83462.2	33482	22790	33648	23303	19123	41686	16560	13784	13852	CDS	peg.588	600906	601769	864	-	Methylene tetrahydromethanopterin dehydrogenase (EC 1.5.99.9)	CDW43_RS02825	#N/A	methylenetetrahydromethanopterin dehydrogenase	#N/A			12338	11834	33901	18642	29925	17368	23448	20702	6046		37832.8	25751.4	38020.3	26331.1	21607.9	47102.8	18711.9	15575.1	15652
CDS	peg.603	#N/A	626913	627035	123	+	hypothetical protein	#N/A	7752	6731	7117	6783	6961	10770	4022	6007	7953	CDS	peg.589	602228	602350	123	+	hypothetical protein	#N/A	CDW43_RS02830	#N/A	hypothetical protein			3331	3016	15432	31062	30021	14917	2856	5360	1547		63024.4	54723.6	57861.8	55146.3	56593.5	87561	32699.2	48837.4	64658.5
CDS	peg.604	Q7A_619	627810	628562	753	-	hypothetical protein	quinoprotein dehydrogenase-associated SoxYZ-like carrier; AFI83465.1	18873	14133	18454	21501	18443	31887	13839	17505	19857	CDS	peg.590	603125	603877	753	-	hypothetical protein	CDW43_RS02840	#N/A	quinoprotein dehydrogenase-associated SoxYZ-like carrier	#N/A			6789	6046	26084	42217	44896	20492	12211	15712	3963		25063.7	18768.9	24507.3	28553.8	24492.7	42346.6	18378.5	23247	26370.5
CDS	peg.605	Q7A_620	628624	629556	933	-	SoxH protein, homolog	MBL fold metallo-hydrolase; AFI83466.1	19526	13258	17942	21606	20096	32259	10328	12278	11053	CDS	peg.591	603939	604871	933	-	SoxH protein, homolog	CDW43_RS02845	CDW43_RS02845	quinoprotein relay system zinc metallohydrolase 2	quinoprotein relay system zinc metallohydrolase 2			7332	6179	23195	32959	36221	17022	9166	11867	4193		20928.2	14210.1	19230.4	23157.6	21539.1	34575.6	11069.7	13159.7	11846.7
CDS	peg.606	Q7A_621	629646	631049	1404	+	Glutamyl-tRNA synthetase (EC 6.1.1.17)	glutamate--tRNA ligase; AFI83467.1	13722	9305	13516	13110	9393	18890	7467	7141	7145	CDS	peg.592	604961	606364	1404	+	Glutamyl-tRNA synthetase (EC 6.1.1.17)	CDW43_RS02850	CDW43_RS02850	glutamate--tRNA ligase	glutamate--tRNA ligase			4376	3770	14226	14452	18068	9185	5232	5551	1239		9773.5	6627.49	9626.78	9337.61	6690.17	13454.4	5318.38	5086.18	5089.03
CDS	peg.607	Q7A_622	631256	633034	1779	+	Methanol dehydrogenase large subunit protein (EC 1.1.99.8)	PQQ-dependent dehydrogenase%2C methanol/ethanol family; AFI83468.1	41396	22869	36733	28826	33522	45306	43328	60487	130035	CDS	peg.593	606571	608349	1779	+	Methanol dehydrogenase large subunit protein (EC 1.1.99.8)	CDW43_RS02855	CDW43_RS02855	methanol/ethanol family PQQ-dependent dehydrogenase	methanol/ethanol family PQQ-dependent dehydrogenase			24453	19060	37846	24303	37107	18874	21805	62051	15302		23269.3	12855	20648.1	16203.5	18843.2	25467.1	24355.3	34000.6	73094.4
CDS	peg.608	Q7A_623	633301	634047	747	+	Bll6196 protein	quinoprotein dehydrogenase-associated putative ABC transporter substrate-binding protein; AFI83469.2	18490	14947	19244	13873	13269	24526	8505	13119	17486	CDS	peg.594	608616	609362	747	+	Bll6196 protein	#N/A	CDW43_RS02860	#N/A	quinoprotein dehydrogenase-associated putative ABC transporter substrate-binding protein			7602	6537	34218	45874	53730	26044	7240	12693	3763		24752.3	20009.4	25761.7	18571.6	17763.1	32832.7	11385.5	17562.2	23408.3
CDS	peg.609	Q7A_03250	634085	634270	186	-	hypothetical protein	hypothetical protein; ASF49186.1	2978	1845	2374	1990	1742	2839	953	1090	1236	CDS	peg.595	609400	609582	183	-	hypothetical protein	CDW43_RS02865	#N/A	DUF302 domain-containing protein	#N/A			1114	1023	3763	3887	5030	2942	1532	1846	369		16010.8	9919.35	12763.4	10698.9	9365.59	15263.4	5123.66	5860.22	6645.16
CDS	peg.610	Q7A_625	634664	635305	642	+	hypothetical protein	hypothetical protein; AFI83471.1	6344	4335	6388	4119	3238	6632	6028	5989	6823	CDS	peg.596	609979	610620	642	+	hypothetical protein	#N/A	CDW43_RS02870	#N/A	hypothetical protein			2436	2128	9583	9170	11579	5746	6658	7256	2019		9881.62	6752.34	9950.16	6415.89	5043.61	10330.2	9389.41	9328.66	10627.7
CDS	peg.611	Q7A_626	635363	636820	1458	+	Sensor histidine kinase	two-component sensor histidine kinase; AFI83472.1	11964	7581	11346	6228	5336	12435	2946	2454	2650	CDS	peg.597	610678	612135	1458	+	Sensor histidine kinase	CDW43_RS02875	CDW43_RS02875	HAMP domain-containing protein	HAMP domain-containing protein			3660	3566	13923	8307	12056	6235	5505	5190	1046		8205.76	5199.59	7781.89	4271.6	3659.81	8528.81	2020.58	1683.13	1817.56
CDS	peg.612	Q7A_627	637015	638391	1377	+	Sigma-54 dependent DNA-binding response regulator	sigma-54-dependent Fis family transcriptional regulator; AFI83473.1	12620	8328	13085	6632	5324	13122	3483	3214	3360	CDS	peg.598	612330	613706	1377	+	Sigma-54 dependent DNA-binding response regulator	CDW43_RS02880	CDW43_RS02880	sigma-54 dependent transcriptional regulator	sigma-54 dependent transcriptional regulator			3631	3077	11595	5798	9024	5345	6497	4768	936		9164.85	6047.93	9502.54	4816.27	3866.38	9529.41	2529.41	2334.06	2440.09
CDS	peg.613	Q7A_628	638393	638800	408	-	Stringent starvation protein B	stringent starvation protein B; AFI83474.1	15441	11053	17086	12208	8203	19729	8000	6838	7518	CDS	peg.599	613708	614115	408	-	Stringent starvation protein B	CDW43_RS02885	CDW43_RS02885	ClpXP protease specificity-enhancing factor	ClpXP protease specificity-enhancing factor			4997	4086	15492	5299	9513	6713	10976	7540	773		37845.6	27090.7	41877.5	29921.6	20105.4	48355.4	19607.8	16759.8	18426.5
CDS	peg.614	Q7A_629	638804	639424	621	-	Stringent starvation protein A	stringent starvation protein A; AFI83475.1	41358	28161	43300	36103	24786	52678	28833	26547	27778	CDS	peg.600	614119	614739	621	-	Stringent starvation protein A	CDW43_RS02890	CDW43_RS02890	glutathione S-transferase N-terminal domain-containing protein	glutathione S-transferase N-terminal domain-containing protein			12863	11779	37127	13605	24670	16299	26432	19356	2422		66599	45347.8	69726.2	58136.9	39913	84827.7	46430	42748.8	44731.1
CDS	peg.615	Q7A_630	639457	640167	711	-	ubiquinol cytochrome C oxidoreductase, cytochrome C1 subunit	cytochrome c1; AFI83476.1	75580	53911	76745	62902	44160	91165	48933	43025	44536	CDS	peg.601	614772	615482	711	-	ubiquinol cytochrome C oxidoreductase, cytochrome C1 subunit	CDW43_RS02895	CDW43_RS02895	cytochrome c1	cytochrome c1			24662	23804	67124	22259	42313	28689	37262	27300	4405		106301	75824.2	107940	88469.8	62109.7	128221	68822.8	60513.4	62638.5
CDS	peg.616	Q7A_631	640164	641375	1212	-	Ubiquinol--cytochrome c reductase, cytochrome B subunit (EC 1.10.2.2)	cytochrome b; AFI83477.1	86112	62915	86231	71219	57354	118044	71254	62676	68444	CDS	peg.602	615479	616684	1206	-	Ubiquinol--cytochrome c reductase, cytochrome B subunit (EC 1.10.2.2)	CDW43_RS02900	#N/A	cytochrome bc complex cytochrome b subunit	#N/A			32920	30226	75967	29214	52439	32457	46006	34196	6437		71049.5	51910.1	71147.7	58761.6	47321.8	97396	58790.4	51712.9	56471.9
CDS	peg.617	Q7A_632	641375	641968	594	-	Ubiquinol-cytochrome C reductase iron-sulfur subunit (EC 1.10.2.2)	ubiquinol-cytochrome c reductase iron-sulfur subunit; AFI83478.2	45364	29421	44024	40568	31371	61320	52301	48662	52144	CDS	peg.603	616690	617283	594	-	Ubiquinol-cytochrome C reductase iron-sulfur subunit (EC 1.10.2.2)	CDW43_RS02905	CDW43_RS02905	ubiquinol-cytochrome c reductase iron-sulfur subunit	ubiquinol-cytochrome c reductase iron-sulfur subunit			16985	15642	42222	18742	33122	19383	29378	24134	5445		76370.4	49530.3	74114.5	68296.3	52813.1	103232	88048.8	81922.6	87784.5
CDS	peg.618	Q7A_633	642140	642586	447	-	Pseudoazurin	copper-binding protein; AFI83479.1	95989	60123	93061	58003	48680	126169	20362	13642	13773	CDS	peg.604	617455	617901	447	-	Pseudoazurin	CDW43_RS02910	CDW43_RS02910	plastocyanin/azurin family copper-binding protein	plastocyanin/azurin family copper-binding protein			37068	31645	117229	37492	84023	52463	13077	15470	4687		214740	134503	208190	129761	108904	282257	45552.6	30519	30812.1
CDS	peg.619	#N/A	643110	643226	117	-	hypothetical protein	#N/A	1410	1145	1634	2572	1782	3157	2739	2828	2811	CDS	peg.605	618425	618541	117	-	hypothetical protein	#N/A	#N/A	#N/A	#N/A			596	535	2142	1913	2491	1411	1264	1491	271		12051.3	9786.32	13965.8	21982.9	15230.8	26982.9	23410.3	24170.9	24025.6
CDS	peg.621	Q7A_635	643618	643884	267	+	Conserved domain protein	transcriptional regulator; AFI83481.1	9819	5744	8091	9327	8160	13437	12423	13347	13728	CDS	peg.606	618933	619199	267	+	Conserved domain protein	CDW43_RS02915	CDW43_RS02915	regulatory-like protein	regulatory-like protein			5400	3854	7397	7371	9181	4312	5850	6913	2069		36775.3	21513.1	30303.4	34932.6	30561.8	50325.8	46528.1	49988.8	51415.7
CDS	peg.622	Q7A_636	643893	644525	633	+	Transporter	hypothetical protein; AFI83482.1	11214	6833	10100	13316	11516	19836	21986	22932	25323	CDS	peg.607	619208	619840	633	+	Transporter	CDW43_RS02920	CDW43_RS02920	DUF502 domain-containing protein	DUF502 domain-containing protein			5845	4475	8490	6758	9471	4452	11085	12888	2652		17715.6	10794.6	15955.8	21036.3	18192.7	31336.5	34733	36227.5	40004.7
CDS	peg.623	Q7A_637	644597	646375	1779	+	Aspartyl-tRNA synthetase (EC 6.1.1.12) @ Aspartyl-tRNA(Asn) synthetase (EC 6.1.1.23)	aspartate--tRNA ligase; AFI83483.1	74232	51612	73329	86972	65795	116676	90118	92748	97777	CDS	peg.608	619912	621690	1779	+	Aspartyl-tRNA synthetase (EC 6.1.1.12) @ Aspartyl-tRNA(Asn) synthetase (EC 6.1.1.23)	CDW43_RS02925	CDW43_RS02925	aspartate--tRNA ligase	aspartate--tRNA ligase			28948	23568	70276	34336	58598	35440	41919	43210	5940		41726.8	29011.8	41219.2	48888.1	36984.3	65585.2	50656.5	52134.9	54961.8
CDS	peg.624	Q7A_638	646418	647530	1113	+	Quinolinate synthetase (EC 2.5.1.72)	quinolinate synthetase; AFI83484.1	55160	38315	55698	71880	52979	90160	62244	67568	66651	CDS	peg.609	621733	622845	1113	+	Quinolinate synthetase (EC 2.5.1.72)	CDW43_RS02930	CDW43_RS02930	quinolinate synthase NadA	quinolinate synthase NadA			21209	17603	50855	29204	44148	26848	23144	26469	4485		49559.7	34425	50043.1	64582.2	47600.2	81006.3	55924.5	60708	59884.1
CDS	peg.625	Q7A_639	647548	647733	186	+	hypothetical protein	zinc-finger domain-containing protein; AFI83485.1	8269	5983	8551	12137	9403	15525	7489	8471	8720	CDS	peg.610	622863	623048	186	+	hypothetical protein	CDW43_RS02935	CDW43_RS02935	zinc-finger domain-containing protein	zinc-finger domain-containing protein			3287	2715	7675	4735	7083	4307	3165	3612	594		44457	32166.7	45973.1	65252.7	50553.8	83467.7	40263.4	45543	46881.7
CDS	peg.626	Q7A_640	647737	648138	402	+	Mutator mutT protein (7,8-dihydro-8-oxoguanine-triphosphatase) (EC 3.6.1.-) / Thiamin-phosphate pyrophosphorylase-like protein	8-oxo-dGTP diphosphatase MutT; AFI83486.1	7253	4135	6586	7532	7195	12220	10630	11865	12506	CDS	peg.611	623052	623453	402	+	Mutator mutT protein (7,8-dihydro-8-oxoguanine-triphosphatase) (EC 3.6.1.-) / Thiamin-phosphate pyrophosphorylase-like protein	CDW43_RS02940	CDW43_RS02940	8-oxo-dGTP diphosphatase MutT	8-oxo-dGTP diphosphatase MutT			2612	1993	5461	4377	5791	3135	5465	6198	1256		18042.3	10286.1	16383.1	18736.3	17898	30398	26442.8	29514.9	31109.5
CDS	peg.627	Q7A_641	648195	648380	186	-	FIG003276: zinc-binding protein	DNA gyrase inhibitor YacG; AFI83487.1	3127	1834	2937	2911	2644	4833	2499	2574	3071	CDS	peg.612	623510	623695	186	-	FIG003276: zinc-binding protein	CDW43_RS02945	CDW43_RS02945	DNA gyrase inhibitor YacG	DNA gyrase inhibitor YacG			1057	875	2610	1741	2496	1501	2583	2456	456		16811.8	9860.22	15790.3	15650.5	14215.1	25983.9	13435.5	13838.7	16510.8
CDS	peg.628	Q7A_642	648383	649153	771	-	FIG002842: hypothetical protein	cell division protein ZapD; AFI83488.1	13840	9450	14277	12275	12505	21446	10827	11416	11931	CDS	peg.613	623698	624468	771	-	FIG002842: hypothetical protein	CDW43_RS02950	CDW43_RS02950	cell division protein ZapD	cell division protein ZapD			4031	3418	14678	11465	15243	8385	10504	10192	2416		17950.7	12256.8	18517.5	15920.9	16219.2	27815.8	14042.8	14806.7	15474.7
CDS	peg.629	Q7A_643	649199	649807	609	-	Dephospho-CoA kinase (EC 2.7.1.24)	dephospho-CoA kinase; AFI83489.1	7561	4586	8109	6193	5038	11470	3422	3649	4284	CDS	peg.614	624514	625122	609	-	Dephospho-CoA kinase (EC 2.7.1.24)	CDW43_RS02955	CDW43_RS02955	dephospho-CoA kinase	dephospho-CoA kinase			2943	2418	10559	5925	9151	5756	3547	3473	962		12415.4	7530.38	13315.3	10169.1	8272.58	18834.2	5619.05	5991.79	7034.48
CDS	peg.630	Q7A_644	649809	650678	870	-	Leader peptidase (Prepilin peptidase) (EC 3.4.23.43) / N-methyltransferase (EC 2.1.1.-)	prepilin peptidase; AFI83490.1	13388	7049	13441	10619	8554	18406	1824	1857	2173	CDS	peg.615	625124	625993	870	-	Leader peptidase (Prepilin peptidase) (EC 3.4.23.43) / N-methyltransferase (EC 2.1.1.-)	CDW43_RS02960	CDW43_RS02960	A24 family peptidase	A24 family peptidase			6373	4746	17653	10647	18134	10127	2103	2243	552		15388.5	8102.3	15449.4	12205.7	9832.18	21156.3	2096.55	2134.48	2497.7
CDS	peg.631	Q7A_645	650683	651930	1248	-	Type IV fimbrial assembly protein PilC	type II secretion system protein F; AFI83491.1	27644	17555	28222	29097	20392	42593	8917	10198	9393	CDS	peg.616	625998	627245	1248	-	Type IV fimbrial assembly protein PilC	CDW43_RS02965	CDW43_RS02965	type II secretion system F family protein	type II secretion system F family protein			12198	10499	46566	44179	59175	31291	8579	8592	3365		22150.6	14066.5	22613.8	23314.9	16339.7	34129	7145.03	8171.47	7526.44
CDS	peg.632	Q7A_646	651934	653652	1719	-	Type IV fimbrial assembly, ATPase PilB	type IV-A pilus assembly ATPase PilB; AFI83492.1	40858	30520	42679	46948	37315	70914	17183	19038	18436	CDS	peg.617	627249	628967	1719	-	Type IV fimbrial assembly, ATPase PilB	CDW43_RS02970	CDW43_RS02970	type IV-A pilus assembly ATPase PilB	type IV-A pilus assembly ATPase PilB			15032	13419	52002	51266	67037	35579	18518	19335	5691		23768.5	17754.5	24827.8	27311.2	21707.4	41253.1	9995.93	11075	10724.8
CDS	peg.633	Q7A_647	653858	653986	129	+	hypothetical protein	hypothetical protein; AFI83493.1	2098	1139	1613	2231	2276	3631	3613	3292	3142	CDS	peg.618	629173	629301	129	+	hypothetical protein	CDW43_RS02975	CDW43_RS02975	lipoprotein	lipoprotein			756	670	1558	1596	2211	1186	2575	2995	515		16263.6	8829.46	12503.9	17294.6	17643.4	28147.3	28007.8	25519.4	24356.6
CDS	peg.634	Q7A_648	653989	655242	1254	+	Diaminopimelate decarboxylase (EC 4.1.1.20)	diaminopimelate decarboxylase; AFI83494.1	23228	15533	22754	25191	20939	37633	11848	11532	11716	CDS	peg.619	629304	630557	1254	+	Diaminopimelate decarboxylase (EC 4.1.1.20)	CDW43_RS02980	CDW43_RS02980	diaminopimelate decarboxylase	diaminopimelate decarboxylase			7703	6806	19283	17534	24712	12682	9300	9700	2120		18523.1	12386.8	18145.1	20088.5	16697.8	30010.4	9448.17	9196.17	9342.9
CDS	peg.635	Q7A_649	655247	656095	849	+	Diaminopimelate epimerase (EC 5.1.1.7)	diaminopimelate epimerase; AFI83495.1	15258	9043	13512	15538	14070	23882	7090	7358	7286	CDS	peg.620	630562	631410	849	+	Diaminopimelate epimerase (EC 5.1.1.7)	#N/A	CDW43_RS02985	#N/A	diaminopimelate epimerase			5377	4390	13723	12299	17593	8572	4265	4523	1326		17971.7	10651.4	15915.2	18301.5	16572.4	28129.6	8351	8666.67	8581.86
CDS	peg.636	Q7A_650	656071	656781	711	+	Protein of unknown function DUF484	hypothetical protein; AFI83496.1	18668	12768	18739	21850	17867	30493	7083	7779	7967	CDS	peg.621	631386	632096	711	+	Protein of unknown function DUF484	CDW43_RS02990	CDW43_RS02990	DUF484 family protein	DUF484 family protein			6582	5817	15961	14490	20677	11563	4553	4856	1042		26256	17957.8	26355.8	30731.4	25129.4	42887.5	9962.03	10940.9	11205.3
CDS	peg.637	Q7A_651	656771	657679	909	+	Tyrosine recombinase XerC	tyrosine recombinase XerC; AFI83497.1	11925	7549	11966	13101	10698	18961	5087	5509	6030	CDS	peg.622	632086	632994	909	+	Tyrosine recombinase XerC	CDW43_RS02995	CDW43_RS02995	tyrosine recombinase XerC	tyrosine recombinase XerC			4533	3567	10711	7387	11684	6454	3765	3693	688		13118.8	8304.73	13163.9	14412.5	11769	20859.2	5596.26	6060.51	6633.66
CDS	peg.638	Q7A_652	657934	658953	1020	+	Sodium/calcium antiporter	cation transporter; AFI83498.1	4390	2690	4179	5333	4355	7466	4154	4250	4765	CDS	peg.623	633249	634268	1020	+	Sodium/calcium antiporter	CDW43_RS03000	CDW43_RS03000	sodium:calcium antiporter	sodium:calcium antiporter			1522	1313	3980	3094	4631	2417	2241	2930	603		4303.92	2637.25	4097.06	5228.43	4269.61	7319.61	4072.55	4166.67	4671.57
CDS	peg.639	Q7A_653	659447	660262	816	-	Mobile element protein	IS110 family transposase; AFI83499.2	3590	1745	3065	15076	12018	16288	22624	14531	10971	CDS	peg.624	634762	635577	816	-	Mobile element protein	CDW43_RS03005	#N/A	IS110 family transposase	#N/A			562	405	964	811	1120	506	849	1076	290		4399.51	2138.48	3756.13	18475.5	14727.9	19960.8	27725.5	17807.6	13444.9
CDS	peg.640	Q7A_654	660661	662058	1398	-	Deoxyribodipyrimidine photolyase (EC 4.1.99.3)	deoxyribodipyrimidine photo-lyase; AFI83500.1	5581	3847	5543	3801	3617	6584	3277	3457	3918	CDS	peg.625	635976	637373	1398	-	Deoxyribodipyrimidine photolyase (EC 4.1.99.3)	CDW43_RS03010	CDW43_RS03010	deoxyribodipyrimidine photo-lyase	deoxyribodipyrimidine photo-lyase			1639	1528	5576	3354	4937	2785	2096	2396	569		3992.13	2751.79	3964.95	2718.88	2587.27	4709.59	2344.06	2472.82	2802.58
CDS	peg.641	Q7A_655	662068	663600	1533	-	deoxyribodipyrimidine photolyase-related protein	cryptochrome/photolyase family protein; AFI83501.1	5423	3449	5325	3667	4012	6337	2475	2483	2820	CDS	peg.626	637383	638915	1533	-	deoxyribodipyrimidine photolyase-related protein	CDW43_RS03015	CDW43_RS03015	cryptochrome/photolyase family protein	cryptochrome/photolyase family protein			1969	1576	5210	5123	6012	3021	1801	2130	597		3537.51	2249.84	3473.58	2392.04	2617.09	4133.72	1614.48	1619.7	1839.53
CDS	peg.642	Q7A_656	663593	664006	414	-	hypothetical protein	DUF3429 domain-containing protein; AFI83502.1	1307	803	1252	790	722	1544	428	428	540	CDS	peg.627	638908	639321	414	-	hypothetical protein	CDW43_RS03020	CDW43_RS03020	DUF3429 domain-containing protein	DUF3429 domain-containing protein			625	448	1143	949	1266	624	359	446	112		3157	1939.61	3024.15	1908.21	1743.96	3729.47	1033.82	1033.82	1304.35
CDS	peg.643	Q7A_657	664003	665451	1449	-	DNA polymerase III epsilon subunit (EC 2.7.7.7)	exonuclease; AFI83503.1	4779	3219	4653	3709	3320	6420	2860	2995	3860	CDS	peg.628	639318	640766	1449	-	DNA polymerase III epsilon subunit (EC 2.7.7.7)	CDW43_RS03025	CDW43_RS03025	exonuclease domain-containing protein	exonuclease domain-containing protein			1513	1324	4014	4429	5147	2549	2383	2955	703		3298.14	2221.53	3211.18	2559.7	2291.24	4430.64	1973.78	2066.94	2663.91
CDS	peg.644	Q7A_658	665768	666652	885	+	Mobile element protein	IS982 family transposase; AFI83504.1	3946	2679	4354	3587	2994	5384	3465	3758	4425	CDS	peg.629	641083	641967	885	+	Mobile element protein	CDW43_RS03035	CDW43_RS03035	IS982 family transposase	IS982 family transposase			1135	1060	3948	3233	4278	2399	3473	3782	523		4458.76	3027.12	4919.77	4053.11	3383.05	6083.62	3915.25	4246.33	5000
CDS	peg.645	Q7A_659	666683	667234	552	-	3'-to-5' oligoribonuclease (orn)	oligoribonuclease; AFI83505.1	12121	7633	11262	9593	8539	14423	11271	12271	13859	CDS	peg.630	641998	642549	552	-	3'-to-5' oligoribonuclease (orn)	CDW43_RS03040	CDW43_RS03040	oligoribonuclease	oligoribonuclease			4035	3546	11929	12858	15437	7797	9293	10390	2408		21958.3	13827.9	20402.2	17378.6	15469.2	26128.6	20418.5	22230.1	25106.9
CDS	peg.646	Q7A_660	667344	668591	1248	+	macromolecule metabolism macromolecule degradation degradation of proteins, peptides, glycopeptides	peptidase M48; AFI83506.1	20020	11877	16198	13182	15193	22964	12607	13246	13761	CDS	peg.631	642659	643906	1248	+	macromolecule metabolism macromolecule degradation degradation of proteins, peptides, glycopeptides	CDW43_RS03045	CDW43_RS03045	M48 family metallopeptidase	M48 family metallopeptidase			10053	7386	17987	24270	28578	11839	11827	12687	3835		16041.7	9516.83	12979.2	10562.5	12173.9	18400.6	10101.8	10613.8	11026.4
CDS	peg.647	Q7A_03260	668595	668870	276	+	hypothetical protein	hypothetical protein; ASF49067.1	7482	5141	6832	6386	5747	9961	3149	4055	3952	CDS	peg.632	643910	644185	276	+	hypothetical protein	CDW43_RS03050	CDW43_RS03050	cytochrome c	cytochrome c			3715	2881	6035	7654	10084	4614	2818	2718	663		27108.7	18626.8	24753.6	23137.7	20822.5	36090.6	11409.4	14692	14318.8
CDS	peg.648	Q7A_662	668871	669908	1038	-	GGDEF domain protein	GGDEF domain-containing protein; AFI83508.1	9635	6657	10873	8032	5970	13691	7416	7072	8299	CDS	peg.633	644186	645223	1038	-	GGDEF domain protein	CDW43_RS03055	CDW43_RS03055	GGDEF domain-containing protein	GGDEF domain-containing protein			2632	2339	9592	5981	8313	5133	8829	7701	1084		9282.27	6413.29	10475	7737.96	5751.45	13189.8	7144.51	6813.1	7995.18
CDS	peg.649	Q7A_663	669935	671149	1215	-	Putative 2-acylglycerophosphoethanolamine acyltransferase / acyl-acyl carrier protein synthetase (EC 6.2.1.20)	MFS transporter; AFI83509.1	10450	6644	10088	11315	8795	16991	10045	8650	9976	CDS	peg.634	645250	646503	1254	-	Putative 2-acylglycerophosphoethanolamine acyltransferase / acyl-acyl carrier protein synthetase (EC 6.2.1.20)	CDW43_RS03060	CDW43_RS03060	MFS transporter	MFS transporter			3855	3391	9591	6044	9852	6349	8530	8040	1061		8600.82	5468.31	8302.88	9312.76	7238.68	13984.4	8267.49	7119.34	8210.7
CDS	peg.650	Q7A_664	671196	671642	447	-	Universal stress protein family COG0589	universal stress protein; AFI83510.1	12270	7974	11254	16555	12864	19862	26524	27112	23878	CDS	peg.635	646511	646957	447	-	Universal stress protein family COG0589	CDW43_RS03065	CDW43_RS03065	universal stress protein	universal stress protein			4642	4030	10201	7768	12365	6195	13227	15282	2295		27449.7	17838.9	25176.7	37035.8	28778.5	44434	59337.8	60653.2	53418.3
CDS	peg.651	Q7A_665	671697	672635	939	-	Thioredoxin reductase (EC 1.8.1.9)	thioredoxin-disulfide reductase; AFI83511.1	34646	21127	31534	39384	31317	53083	42096	39579	37631	CDS	peg.636	647012	647950	939	-	Thioredoxin reductase (EC 1.8.1.9)	CDW43_RS03070	CDW43_RS03070	thioredoxin-disulfide reductase	thioredoxin-disulfide reductase			12831	10750	28453	22616	34094	17599	27700	28221	7246		36896.7	22499.5	33582.5	41942.5	33351.4	56531.4	44830.7	42150.2	40075.6
CDS	peg.652	Q7A_666	673038	675341	2304	+	Cell division protein FtsK	DNA translocase FtsK; AFI83512.1	33873	18182	28701	42517	33256	50979	40523	39124	39563	CDS	peg.637	648353	650656	2304	+	Cell division protein FtsK	CDW43_RS03075	CDW43_RS03075	DNA translocase FtsK	DNA translocase FtsK			15084	11271	27265	24409	34582	18224	16953	17818	2621		14701.8	7891.49	12457	18453.6	14434	22126.3	17588.1	16980.9	17171.4
CDS	peg.653	Q7A_667	675402	676034	633	+	Outer membrane lipoprotein carrier protein LolA	outer membrane lipoprotein carrier protein LolA; AFI83513.1	15223	9339	14049	16600	12458	21485	13137	12328	12079	CDS	peg.638	650717	651349	633	+	Outer membrane lipoprotein carrier protein LolA	CDW43_RS03080	CDW43_RS03080	outer membrane lipoprotein chaperone LolA	outer membrane lipoprotein chaperone LolA			5022	4260	15892	16849	21270	10638	6303	6036	1033		24049	14753.6	22194.3	26224.3	19680.9	33941.5	20753.6	19475.5	19082.1
CDS	peg.654	Q7A_668	676034	677356	1323	+	FIG065221: Holliday junction DNA helicase	recombination factor protein RarA; AFI83514.1	17624	10547	16148	19554	15799	27383	23121	23025	22635	CDS	peg.639	651349	652671	1323	+	FIG065221: Holliday junction DNA helicase	CDW43_RS03085	CDW43_RS03085	replication-associated recombination protein A	replication-associated recombination protein A			6825	5498	15852	13907	20135	9249	10924	12652	1246		13321.2	7972.03	12205.6	14780	11941.8	20697.7	17476.2	17403.6	17108.8
CDS	peg.655	Q7A_669	677363	678118	756	-	SAM-dependent methyltransferase (EC 2.1.1.-)	16S rRNA methyltransferase; AFI83515.1	9984	6333	9928	12519	8993	16307	6461	6027	7006	CDS	peg.640	652678	653433	756	-	SAM-dependent methyltransferase (EC 2.1.1.-)	CDW43_RS03090	#N/A	class I SAM-dependent methyltransferase	#N/A			4389	3604	12108	7281	11047	6918	3508	3594	619		13206.3	8376.98	13132.3	16559.5	11895.5	21570.1	8546.3	7972.22	9267.2
CDS	peg.656	Q7A_670	678125	679117	993	-	Bll4706 protein	cell surface protein; AFI83516.1	10821	8105	11124	12992	10678	18279	5010	5063	5757	CDS	peg.641	653440	654432	993	-	Bll4706 protein	CDW43_RS03095	CDW43_RS03095	beta-propeller fold lactonase family protein	beta-propeller fold lactonase family protein			4953	4487	17894	11175	17025	10164	4917	5663	1204		10897.3	8162.13	11202.4	13083.6	10753.3	18407.9	5045.32	5098.69	5797.58
CDS	peg.657	Q7A_671	679117	679680	564	-	MxaD protein	SRPBCC family protein; AFI83517.1	27026	20801	25168	31978	26353	48262	30944	30616	32113	CDS	peg.642	654432	654995	564	-	MxaD protein	CDW43_RS03100	CDW43_RS03100	SRPBCC family protein	SRPBCC family protein			9954	10470	49490	27296	43466	26512	22100	24604	6199		47918.4	36881.2	44624.1	56698.6	46725.2	85570.9	54865.2	54283.7	56937.9
CDS	peg.658	Q7A_672	679883	680689	807	+	Uncharacterized ABC transporter, ATP-binding protein YrbF	phospholipid ABC transporter ATP-binding protein MlaF; AFI83518.1	28793	16084	24943	30178	25481	39907	25761	24781	24638	CDS	peg.643	655198	656004	807	+	Uncharacterized ABC transporter, ATP-binding protein YrbF	CDW43_RS03105	CDW43_RS03105	ABC transporter ATP-binding protein	ABC transporter ATP-binding protein			12731	10251	20863	18404	24334	12970	20313	18919	3707		35679.1	19930.6	30908.3	37395.3	31575	49451.1	31921.9	30707.6	30530.4
CDS	peg.659	Q7A_673	680686	681468	783	+	Uncharacterized ABC transporter, permease component YrbE	ABC transporter permease; AFI83519.1	23427	13297	21051	24311	20322	34472	13189	11974	12485	CDS	peg.644	656001	656783	783	+	Uncharacterized ABC transporter, permease component YrbE	CDW43_RS03110	CDW43_RS03110	lipid asymmetry maintenance ABC transporter permease subunit MlaE	lipid asymmetry maintenance ABC transporter permease subunit MlaE			9402	7901	18168	13273	18828	9974	8459	7791	1347		29919.5	16982.1	26885.1	31048.5	25954	44025.5	16844.2	15292.5	15945.1
CDS	peg.660	Q7A_674	681469	681933	465	+	Uncharacterized ABC transporter, periplasmic component YrbD	outer membrane lipid asymmetry maintenance protein MlaD; AFI83520.1	25909	16604	24406	28671	19620	36519	18545	18311	17035	CDS	peg.645	656784	657248	465	+	Uncharacterized ABC transporter, periplasmic component YrbD	CDW43_RS03115	CDW43_RS03115	outer membrane lipid asymmetry maintenance protein MlaD	outer membrane lipid asymmetry maintenance protein MlaD			8986	8086	23968	16573	25079	14574	11943	10594	1533		55718.3	35707.5	52486	61658.1	42193.5	78535.5	39881.7	39378.5	36634.4
CDS	peg.661	Q7A_675	681935	682561	627	+	Uncharacterized ABC transporter, auxiliary component YrbC	toluene tolerance protein; AFI83521.1	44423	30911	45899	52655	35708	67764	29725	30030	28967	CDS	peg.646	657250	657876	627	+	Uncharacterized ABC transporter, auxiliary component YrbC	CDW43_RS03120	CDW43_RS03120	ABC transporter substrate-binding protein	ABC transporter substrate-binding protein			14841	13920	43238	28722	44361	26276	20278	17478	3032		70850.1	49299.8	73204.1	83979.3	56950.6	108077	47408.3	47894.7	46199.4
CDS	peg.662	Q7A_676	682558	682854	297	+	Uncharacterized protein YrbB	anti-anti-sigma factor; AFI83522.1	10054	5886	9186	9952	8076	15043	10777	10186	9443	CDS	peg.647	657873	658169	297	+	Uncharacterized protein YrbB	CDW43_RS03125	CDW43_RS03125	STAS domain-containing protein	STAS domain-containing protein			3312	2948	8244	5534	8101	4095	7995	6584	983		33851.9	19818.2	30929.3	33508.4	27191.9	50649.8	36286.2	34296.3	31794.6
CDS	peg.663	Q7A_677	682876	683100	225	+	YrbA protein	BolA family transcriptional regulator; AFI83523.1	15772	8783	14395	13873	9808	19870	11558	10889	10556	CDS	peg.648	658191	658415	225	+	YrbA protein	CDW43_RS03130	CDW43_RS03130	BolA/IbaG family iron-sulfur metabolism protein	BolA/IbaG family iron-sulfur metabolism protein			5369	4719	13514	7507	12077	7189	9018	7688	1173		70097.8	39035.6	63977.8	61657.8	43591.1	88311.1	51368.9	48395.6	46915.6
CDS	peg.664	Q7A_678	683131	684417	1287	+	UDP-N-acetylglucosamine 1-carboxyvinyltransferase (EC 2.5.1.7)	UDP-N-acetylglucosamine 1-carboxyvinyltransferase; AFI83524.1	56455	31712	51817	48162	37683	71412	28697	26769	26251	CDS	peg.649	658446	659732	1287	+	UDP-N-acetylglucosamine 1-carboxyvinyltransferase (EC 2.5.1.7)	CDW43_RS03135	CDW43_RS03135	UDP-N-acetylglucosamine 1-carboxyvinyltransferase	UDP-N-acetylglucosamine 1-carboxyvinyltransferase			18449	16470	41434	22046	37955	21418	22985	18333	2293		43865.6	24640.2	40261.8	37421.9	29279.7	55487.2	22297.6	20799.5	20397
CDS	peg.665	Q7A_679	684410	685054	645	+	ATP phosphoribosyltransferase (EC 2.4.2.17)	ATP phosphoribosyltransferase; AFI83525.1	24081	13537	22588	19494	14734	31350	11132	9637	9923	CDS	peg.650	659725	660369	645	+	ATP phosphoribosyltransferase (EC 2.4.2.17)	CDW43_RS03140	CDW43_RS03140	ATP phosphoribosyltransferase	ATP phosphoribosyltransferase			6383	5738	16389	7524	13927	7996	11514	8569	1011		37334.9	20987.6	35020.2	30223.3	22843.4	48604.7	17258.9	14941.1	15384.5
CDS	peg.666	Q7A_680	685047	686351	1305	+	Histidinol dehydrogenase (EC 1.1.1.23)	histidinol dehydrogenase; AFI83526.1	66409	39419	62115	54250	42816	80432	48610	45876	45986	CDS	peg.651	660362	661666	1305	+	Histidinol dehydrogenase (EC 1.1.1.23)	CDW43_RS03145	CDW43_RS03145	histidinol dehydrogenase	histidinol dehydrogenase			20612	18607	47094	25864	40504	23647	35443	30710	4629		50888.1	30206.1	47597.7	41570.9	32809.2	61633.7	37249	35154	35238.3
CDS	peg.667	Q7A_681	686351	687406	1056	+	Histidinol-phosphate aminotransferase (EC 2.6.1.9)	histidinol-phosphate transaminase; AFI83527.1	40010	23459	36988	33290	26156	50240	24270	22237	22875	CDS	peg.652	661666	662721	1056	+	Histidinol-phosphate aminotransferase (EC 2.6.1.9)	CDW43_RS03150	CDW43_RS03150	histidinol-phosphate transaminase	histidinol-phosphate transaminase			12969	11018	27716	14989	23974	14152	21157	16424	1912		37888.3	22215	35026.5	31524.6	24768.9	47575.8	22983	21057.8	21661.9
CDS	peg.668	Q7A_682	687403	688071	669	-	hypothetical protein	DUF4124 domain-containing protein; AFI83528.2	8054	4684	7083	6076	5191	9315	8154	7868	8442	CDS	peg.653	662718	663386	669	-	hypothetical protein	CDW43_RS03155	CDW43_RS03155	DUF4124 domain-containing protein	DUF4124 domain-containing protein			3119	2564	5781	5005	6834	3596	6997	6353	905		12038.9	7001.49	10587.4	9082.21	7759.34	13923.8	12188.3	11760.8	12618.8
CDS	peg.669	Q7A_683	688099	688860	762	+	Predicted permease	anion permease; AFI83529.1	2473	1235	2099	1638	1679	3201	1208	1068	1139	CDS	peg.654	663414	664175	762	+	Predicted permease	CDW43_RS03160	CDW43_RS03160	sulfite exporter TauE/SafE family protein	sulfite exporter TauE/SafE family protein			889	575	1851	1133	1749	982	1116	1132	276		3245.41	1620.73	2754.59	2149.61	2203.41	4200.79	1585.3	1401.57	1494.75
CDS	peg.670	Q7A_684	689131	689772	642	-	Orotate phosphoribosyltransferase (EC 2.4.2.10)	orotate phosphoribosyltransferase; AFI83530.1	12034	8069	11600	7293	6936	15316	3112	3017	2911	CDS	peg.655	664446	665087	642	-	Orotate phosphoribosyltransferase (EC 2.4.2.10)	CDW43_RS03170	CDW43_RS03170	orotate phosphoribosyltransferase	orotate phosphoribosyltransferase			3030	2782	9516	4242	7615	4447	3350	2665	610		18744.5	12568.5	18068.5	11359.8	10803.7	23856.7	4847.35	4699.38	4534.27
CDS	peg.671	Q7A_685	689769	690371	603	-	Homoserine O-acetyltransferase (EC 2.3.1.31)	methionine biosynthesis protein MetW; AFI83531.1	11758	8306	11906	7546	6265	14666	3916	4011	4030	CDS	peg.656	665084	665686	603	-	Homoserine O-acetyltransferase (EC 2.3.1.31)	CDW43_RS03175	CDW43_RS03175	methionine biosynthesis protein MetW	methionine biosynthesis protein MetW			3019	2777	9994	4081	7792	5142	3779	3078	694		19499.2	13774.5	19744.6	12514.1	10389.7	24321.7	6494.2	6651.74	6683.25
CDS	peg.672	Q7A_686	690371	691519	1149	-	Homoserine O-acetyltransferase (EC 2.3.1.31)	homoserine O-acetyltransferase; AFI83532.1	20487	13186	19119	14920	12711	26703	6735	7450	7559	CDS	peg.657	665686	666834	1149	-	Homoserine O-acetyltransferase (EC 2.3.1.31)	CDW43_RS03180	CDW43_RS03180	homoserine O-acetyltransferase	homoserine O-acetyltransferase			6360	5358	16019	7810	13491	8256	5762	5259	1305		17830.3	11476.1	16639.7	12985.2	11062.7	23240.2	5861.62	6483.9	6578.76
CDS	peg.673	Q7A_687	691541	692116	576	-	Integral membrane protein YggT, involved in response to extracytoplasmic stress (osmotic shock)	YggT family protein; AFI83533.1	9762	6615	9410	8173	7328	14213	4861	4947	5320	CDS	peg.658	666856	667431	576	-	Integral membrane protein YggT, involved in response to extracytoplasmic stress (osmotic shock)	CDW43_RS03185	CDW43_RS03185	YggT family protein	YggT family protein			2977	2778	7755	5806	8362	4857	4267	3908	1029		16947.9	11484.4	16336.8	14189.2	12722.2	24675.3	8439.24	8588.54	9236.11
CDS	peg.674	Q7A_688	692109	692942	834	-	Pyrroline-5-carboxylate reductase (EC 1.5.1.2)	pyrroline-5-carboxylate reductase; AFI83534.1	13237	8707	12485	10819	8886	17195	5070	5291	5017	CDS	peg.659	667424	668257	834	-	Pyrroline-5-carboxylate reductase (EC 1.5.1.2)	CDW43_RS03190	CDW43_RS03190	pyrroline-5-carboxylate reductase	pyrroline-5-carboxylate reductase			4488	3852	10834	8109	12282	6869	5184	5267	1673		15871.7	10440	14970	12972.4	10654.7	20617.5	6079.14	6344.12	6015.59
CDS	peg.675	Q7A_689	692991	693689	699	-	Hypothetical protein YggS, proline synthase co-transcribed bacterial homolog PROSC	YggS family pyridoxal phosphate enzyme; AFI83535.1	3480	2580	3592	4122	3808	6507	3590	3849	4174	CDS	peg.660	668306	669004	699	-	Hypothetical protein YggS, proline synthase co-transcribed bacterial homolog PROSC	CDW43_RS03195	CDW43_RS03195	YggS family pyridoxal phosphate-dependent enzyme	YggS family pyridoxal phosphate-dependent enzyme			1606	1263	3078	2620	3624	1951	2513	2596	808		4978.54	3690.99	5138.77	5897	5447.78	9309.01	5135.91	5506.44	5971.39
CDS	peg.676	Q7A_690	693781	694818	1038	+	Twitching motility protein PilT	twitching motility protein PilT; AFI83536.1	21315	16067	21653	26932	22146	37001	10563	12831	10724	CDS	peg.661	669096	670133	1038	+	Twitching motility protein PilT	CDW43_RS03200	CDW43_RS03200	type IV pilus twitching motility protein PilT	type IV pilus twitching motility protein PilT			9064	8601	29482	36363	41726	21040	5751	8038	4240		20534.7	15478.8	20860.3	25946.1	21335.3	35646.4	10176.3	12361.3	10331.4
CDS	peg.677	Q7A_691	694828	695970	1143	+	Twitching motility protein PilT	type IV pili twitching motility protein PilT; AFI83537.1	25436	17998	26715	31697	22536	46152	10176	12988	10237	CDS	peg.662	670143	671285	1143	+	Twitching motility protein PilT	CDW43_RS03205	CDW43_RS03205	PilT/PilU family type 4a pilus ATPase	PilT/PilU family type 4a pilus ATPase			9498	8047	39191	46698	56255	27386	6433	7906	3194		22253.7	15746.3	23372.7	27731.4	19716.5	40378	8902.89	11363.1	8956.26
CDS	peg.678	Q7A_692	696143	696994	852	+	Outer membrane protein A precursor	OmpA family protein; AFI83538.1	95896	70998	93092	132881	92105	168434	93055	104798	99189	CDS	peg.663	671458	672309	852	+	Outer membrane protein A precursor	CDW43_RS03210	CDW43_RS03210	OmpA family protein	OmpA family protein			37354	34430	132117	186577	235051	106785	39679	44373	12227		112554	83331	109263	155964	108104	197692	109219	123002	116419
CDS	peg.679	Q7A_693	697396	697587	192	+	Protein yjbJ	CsbD family protein; AFI83539.1	229	116	185	73	127	307	468	422	410	CDS	peg.664	672711	672902	192	+	Protein yjbJ	CDW43_RS03215	CDW43_RS03215	CsbD family protein	CsbD family protein			110	70	144	128	148	75	569	769	85		1192.71	604.167	963.542	380.208	661.458	1598.96	2437.5	2197.92	2135.42
CDS	peg.680	Q7A_694	697806	698363	558	+	putative hyperosmotically inducible periplasmic protein	BON domain-containing protein; AFI83540.1	1363	1072	1290	1103	1001	1768	2561	2578	2142	CDS	peg.665	673118	673678	561	+	putative hyperosmotically inducible periplasmic protein	CDW43_RS03220	CDW43_RS03220	BON domain-containing protein	BON domain-containing protein			480	360	1019	1077	1217	585	2019	3666	503		2442.65	1921.15	2311.83	1976.7	1793.91	3168.46	4589.61	4620.07	3838.71
CDS	peg.681	#N/A	698371	698832	462	+	hypothetical protein	#N/A	1617	994	1337	1419	1584	2515	4278	4876	4429	CDS	peg.666	673686	674147	462	+	hypothetical protein	CDW43_RS03225	CDW43_RS03225	hypothetical protein	hypothetical protein			522	432	1372	1607	2061	868	2716	3378	675		3500	2151.52	2893.94	3071.43	3428.57	5443.72	9259.74	10554.1	9586.58
CDS	peg.682	Q7A_696	699053	700279	1227	+	Transcriptional regulatory protein	sigma-54-dependent Fis family transcriptional regulator; AFI83542.1	5320	3456	5059	4471	4188	8102	4544	4754	5376	CDS	peg.667	674368	675594	1227	+	Transcriptional regulatory protein	CDW43_RS03230	CDW43_RS03230	sigma-54 dependent transcriptional regulator	sigma-54 dependent transcriptional regulator			1775	1400	4753	8649	8715	3917	4824	5391	1298		4335.78	2816.63	4123.06	3643.85	3413.2	6603.1	3703.34	3874.49	4381.42
CDS	peg.683	Q7A_697	700458	701771	1314	-	HipA protein	toxin HipA; AFI83543.1	2585	1946	2603	3049	3081	5195	2592	2873	4180	CDS	peg.668	675773	677086	1314	-	HipA protein	CDW43_RS03235	CDW43_RS03235	type II toxin-antitoxin system HipA family toxin	type II toxin-antitoxin system HipA family toxin			1194	1213	2751	2791	3649	1985	2513	2643	1276		1967.28	1480.97	1980.97	2320.4	2344.75	3953.58	1972.6	2186.45	3181.13
CDS	peg.684	Q7A_698	701773	702024	252	-	HipB protein	transcriptional regulator; AFI83544.1	501	364	546	565	685	1017	605	625	996	CDS	peg.669	677088	677339	252	-	HipB protein	CDW43_RS03240	CDW43_RS03240	helix-turn-helix domain-containing protein	helix-turn-helix domain-containing protein			342	304	434	585	620	292	614	683	695		1988.1	1444.44	2166.67	2242.06	2718.25	4035.71	2400.79	2480.16	3952.38
CDS	peg.685	#N/A	702269	702439	171	+	Mobile element protein	#N/A	178	92	168	163	113	247	187	205	296	CDS	peg.670	677584	677754	171	+	Mobile element protein	CDW43_RS03245	CDW43_RS03245	hypothetical protein	hypothetical protein			150	90	449	280	506	277	990	1136	150		1040.94	538.012	982.456	953.216	660.819	1444.44	1093.57	1198.83	1730.99
CDS	peg.686	Q7A_700	702429	702818	390	+	hypothetical protein	hypothetical protein; AFI83546.2	686	378	637	512	480	867	673	750	897	CDS	peg.671	677744	678133	390	+	hypothetical protein	CDW43_RS03250	CDW43_RS03250	hypothetical protein	hypothetical protein			661	581	1979	1394	1981	1118	3827	3897	663		1758.97	969.231	1633.33	1312.82	1230.77	2223.08	1725.64	1923.08	2300
CDS	peg.725	Q7A_741	753192	755699	2508	-	Glycogen phosphorylase (EC 2.4.1.1)	glycogen/starch/alpha-glucan family phosphorylase; AFI83586.1	25429	16843	25869	21261	16361	36561	12474	10484	9318	CDS	peg.672	678415	680922	2508	-	Glycogen phosphorylase (EC 2.4.1.1)	CDW43_RS03260	CDW43_RS03260	glycogen/starch/alpha-glucan phosphorylase	glycogen/starch/alpha-glucan phosphorylase			8058	7537	32308	20139	28785	16598	17708	13780	3726		10139.2	6715.71	10314.6	8477.27	6523.52	14577.8	4973.68	4180.22	3715.31
CDS	peg.726	Q7A_742	755906	756520	615	-	GTP-binding protein EngB	YihA family ribosome biogenesis GTP-binding protein; AFI83587.1	8553	4448	7153	6253	4498	9204	5097	4553	4307	CDS	peg.673	681129	681743	615	-	GTP-binding protein EngB	CDW43_RS03265	CDW43_RS03265	ribosome biogenesis GTP-binding protein YihA/YsxC	ribosome biogenesis GTP-binding protein YihA/YsxC			2602	2229	6752	3493	6154	3468	7931	6149	930		13907.3	7232.52	11630.9	10167.5	7313.82	14965.9	8287.8	7403.25	7003.25
CDS	peg.727	Q7A_743	756606	757214	609	+	Cytochrome c4	cytochrome c4; AFI83588.1	42928	23296	35158	26578	23477	45163	20784	19826	17919	CDS	peg.674	681829	682437	609	+	Cytochrome c4	CDW43_RS03270	CDW43_RS03270	cytochrome c4	cytochrome c4			15067	12833	33083	21082	31464	16438	27953	21041	6228		70489.3	38252.9	57730.7	43642	38550.1	74159.3	34128.1	32555	29423.6
CDS	peg.728	Q7A_744	757290	759296	2007	+	Cytochrome c-type biogenesis protein Ccs1/ResB	cytochrome c biogenesis protein ResB; AFI83589.1	49665	30530	47689	36429	27406	61151	16882	15601	14482	CDS	peg.675	682513	684519	2007	+	Cytochrome c-type biogenesis protein Ccs1/ResB	CDW43_RS03275	CDW43_RS03275	cytochrome c biogenesis protein ResB	cytochrome c biogenesis protein ResB			15258	13853	43287	19804	34145	21139	28093	17511	3305		24745.9	15211.8	23761.3	18151	13655.2	30468.9	8411.56	7773.29	7215.74
CDS	peg.729	Q7A_745	759337	760485	1149	+	Cytochrome c-type biogenesis protein CcsA/ResC	c-type cytochrome biogenesis protein CcsB; AFI83590.1	43078	27123	36454	33413	31169	51469	14432	14913	14142	CDS	peg.676	684560	685708	1149	+	Cytochrome c-type biogenesis protein CcsA/ResC	CDW43_RS03280	CDW43_RS03280	c-type cytochrome biogenesis protein CcsB	c-type cytochrome biogenesis protein CcsB			18087	14106	43447	54735	62955	31169	14886	12992	3190		37491.7	23605.7	31726.7	29080.1	27127.1	44794.6	12560.5	12979.1	12308.1
CDS	peg.730	Q7A_746	760507	761148	642	+	Periplasmic thiol:disulfide interchange protein DsbA	disulfide bond formation protein DsbA; AFI83591.1	17019	11787	13912	12577	11475	21688	7874	7299	7034	CDS	peg.677	685730	686371	642	+	Periplasmic thiol:disulfide interchange protein DsbA	CDW43_RS03285	CDW43_RS03285	thiol:disulfide interchange protein DsbA/DsbL	thiol:disulfide interchange protein DsbA/DsbL			5558	5169	18669	22035	27149	13146	10732	8343	2264		26509.3	18359.8	21669.8	19590.3	17873.8	33781.9	12264.8	11369.2	10956.4
CDS	peg.731	Q7A_747	761201	762622	1422	-	Transglycosylase, Slt family	lytic transglycosylase F; AFI83592.1	8028	4971	8327	4723	4308	9088	6186	5778	7289	CDS	peg.678	686424	687845	1422	-	Transglycosylase, Slt family	CDW43_RS03290	CDW43_RS03290	membrane-bound lytic murein transglycosylase MltF	membrane-bound lytic murein transglycosylase MltF			3033	2510	8611	5496	7497	4284	11091	10189	1589		5645.57	3495.78	5855.84	3321.38	3029.54	6391	4350.21	4063.29	5125.88
CDS	peg.732	Q7A_748	762701	763150	450	-	tRNA-specific adenosine-34 deaminase (EC 3.5.4.-)	tRNA-specific adenosine deaminase; AFI83593.1	3795	2396	3553	2917	2506	5155	1463	1418	1604	CDS	peg.679	687924	688352	429	-	tRNA-specific adenosine-34 deaminase (EC 3.5.4.-)	CDW43_RS03295	#N/A	tRNA adenosine(34) deaminase TadA	#N/A			1556	1156	3133	1785	2934	1774	2072	1895	339		8433.33	5324.44	7895.56	6482.22	5568.89	11455.6	3251.11	3151.11	3564.44
CDS	peg.733	Q7A_749	763137	764411	1275	-	Lipid IVA 3-deoxy-D-manno-octulosonic acid transferase (EC 2.4.99.12) [often with (EC 2.4.99.13) also]	3-deoxy-D-manno-octulosonic acid transferase; AFI83594.1	8746	5916	8624	6103	5456	10956	4927	4579	4938	CDS	peg.680	688360	689634	1275	-	Lipid IVA 3-deoxy-D-manno-octulosonic acid transferase (EC 2.4.99.12) [often with (EC 2.4.99.13) also]	CDW43_RS03300	#N/A	lipid IV(A) 3-deoxy-D-manno-octulosonic acid transferase	#N/A			3114	2635	8513	5323	8230	4835	6219	6234	1191		6859.61	4640	6763.92	4786.67	4279.22	8592.94	3864.31	3591.37	3872.94
CDS	peg.734	Q7A_750	764496	765416	921	+	Lipid A biosynthesis lauroyl acyltransferase (EC 2.3.1.-)	lipid A biosynthesis acyltransferase; AFI83595.2	8030	4606	7169	5513	4816	9907	6366	5739	5923	CDS	peg.681	689719	690639	921	+	Lipid A biosynthesis lauroyl acyltransferase (EC 2.3.1.-)	#N/A	CDW43_RS03305	#N/A	LpxL/LpxP family Kdo(2)-lipid IV(A) lauroyl/palmitoleoyl acyltransferase			2928	2427	9018	7053	9873	5060	8433	8066	1843		8718.78	5001.09	7783.93	5985.88	5229.1	10756.8	6912.05	6231.27	6431.05
CDS	peg.735	Q7A_751	765413	765901	489	-	hypothetical protein	acyloxyacyl hydrolase; AFI83596.1	8093	4953	6989	3777	3645	8175	5225	3856	4364	CDS	peg.682	690636	691124	489	-	hypothetical protein	CDW43_RS03310	CDW43_RS03310	acyloxyacyl hydrolase	acyloxyacyl hydrolase			5580	4762	14412	16028	19990	9660	12062	11848	5105		16550.1	10128.8	14292.4	7723.93	7453.99	16717.8	10685.1	7885.48	8924.34
CDS	peg.736	Q7A_752	766027	766416	390	-	SSU ribosomal protein S9p (S16e)	30S ribosomal protein S9; AFI83597.1	65219	32605	54292	50811	39921	72871	65928	50608	51154	CDS	peg.683	691250	691639	390	-	SSU ribosomal protein S9p (S16e)	CDW43_RS03315	CDW43_RS03315	30S ribosomal protein S9	30S ribosomal protein S9			26351	21515	39196	16847	31107	17849	69282	57345	6789		167228	83602.6	139210	130285	102362	186849	169046	129764	131164
CDS	peg.737	Q7A_753	766429	766857	429	-	LSU ribosomal protein L13p (L13Ae)	50S ribosomal protein L13; AFI83598.1	116213	57106	99676	75377	48651	107159	101334	84945	91452	CDS	peg.684	691652	692080	429	-	LSU ribosomal protein L13p (L13Ae)	CDW43_RS03320	CDW43_RS03320	50S ribosomal protein L13	50S ribosomal protein L13			24961	23758	64614	30739	51740	30820	120682	99376	12019		270893	133114	232345	175704	113406	249788	236210	198007	213175
CDS	peg.738	Q7A_754	766944	767741	798	-	Undecaprenyl-diphosphatase (EC 3.6.1.27)	undecaprenyl-diphosphatase; AFI83599.1	11982	7406	11152	13612	9555	17670	14579	13550	14133	CDS	peg.685	692167	692964	798	-	Undecaprenyl-diphosphatase (EC 3.6.1.27)	CDW43_RS03325	CDW43_RS03325	undecaprenyl-diphosphate phosphatase	undecaprenyl-diphosphate phosphatase			3065	2503	9573	10639	13346	6719	8237	8283	1404		15015	9280.7	13974.9	17057.6	11973.7	22142.9	18269.4	16979.9	17710.5
CDS	peg.739	Q7A_755	767949	771722	3774	+	FAD/FMN-containing dehydrogenases	FAD-linked oxidase; AFI83600.2	48610	30030	43151	59427	45376	74513	89553	89826	79405	CDS	peg.686	693172	696945	3774	+	FAD/FMN-containing dehydrogenases	#N/A	CDW43_RS03330	#N/A	DUF3683 domain-containing protein			20842	17191	42111	49664	63838	32075	55809	73109	10005		12880.2	7957.07	11433.8	15746.4	12023.3	19743.8	23728.9	23801.3	21040
CDS	peg.740	Q7A_756	771784	772131	348	-	Type III effector HopPmaJ	type III effector; AFI83601.1	6288	4196	6185	6641	4796	9321	4584	4507	4185	CDS	peg.687	697007	697354	348	-	Type III effector HopPmaJ	CDW43_RS03335	CDW43_RS03335	HopJ type III effector protein	HopJ type III effector protein			2100	2014	5057	4909	6711	3844	4029	5023	595		18069	12057.5	17773	19083.3	13781.6	26784.5	13172.4	12951.1	12025.9
CDS	peg.741	Q7A_757	772147	772812	666	-	Oxygen-insensitive NADPH nitroreductase (EC 1.-.-.-)	nitroreductase; AFI83602.1	3755	2536	3843	3151	2682	5249	2186	2045	2122	CDS	peg.688	697370	698035	666	-	Oxygen-insensitive NADPH nitroreductase (EC 1.-.-.-)	CDW43_RS03340	CDW43_RS03340	nitroreductase	nitroreductase			1277	1167	3339	2433	3572	1859	2478	2822	643		5638.14	3807.81	5770.27	4731.23	4027.03	7881.38	3282.28	3070.57	3186.19
CDS	peg.742	Q7A_758	772802	773035	234	-	hypothetical protein	DUF454 domain-containing protein; AFI83603.1	1209	637	1092	972	765	1538	501	505	536	CDS	peg.689	698025	698258	234	-	hypothetical protein	CDW43_RS03345	#N/A	YbaN family protein	#N/A			410	329	1136	910	1217	726	595	752	154		5166.67	2722.22	4666.67	4153.85	3269.23	6572.65	2141.03	2158.12	2290.6
CDS	peg.743	#N/A	773533	773655	123	+	hypothetical protein	#N/A	617	353	575	459	392	854	371	313	412	CDS	peg.690	698756	698878	123	+	hypothetical protein	#N/A	#N/A	#N/A	#N/A			203	175	628	526	583	300	427	487	101		5016.26	2869.92	4674.8	3731.71	3186.99	6943.09	3016.26	2544.72	3349.59
CDS	peg.744	Q7A_760	773707	774615	909	+	50S ribosomal subunit maturation GTPase RbgA (B. subtilis YlqF)	ribosome biogenesis GTPase YlqF; AFI83605.1	8921	4995	7658	8820	8457	11495	16297	18642	20167	CDS	peg.691	698930	699838	909	+	50S ribosomal subunit maturation GTPase RbgA (B. subtilis YlqF)	CDW43_RS03350	CDW43_RS03350	ribosome biogenesis GTPase YlqF	ribosome biogenesis GTPase YlqF			2800	2457	7065	8829	10629	4901	7216	7832	1624		9814.08	5495.05	8424.64	9702.97	9303.63	12645.8	17928.5	20508.3	22185.9
CDS	peg.745	Q7A_761	774699	775214	516	+	Starvation lipoprotein Slp paralog	hypothetical protein; AFI83606.1	2928	1928	2845	2628	2194	3919	3119	3186	3844	CDS	peg.692	699922	700437	516	+	Starvation lipoprotein Slp paralog	CDW43_RS03355	CDW43_RS03355	Slp family lipoprotein	Slp family lipoprotein			1073	826	3138	4515	4851	2312	2247	2510	640		5674.42	3736.43	5513.57	5093.02	4251.94	7594.96	6044.57	6174.42	7449.61
CDS	peg.746	Q7A_762	775323	775508	186	+	hypothetical protein	hypothetical protein; AFI83607.1	581	286	502	282	720	1583	901	1127	1080	CDS	peg.693	700546	700731	186	+	hypothetical protein	CDW43_RS03360	CDW43_RS03360	hypothetical protein	hypothetical protein			225	176	466	333	454	236	467	585	8958		3123.66	1537.63	2698.92	1516.13	3870.97	8510.75	4844.09	6059.14	5806.45
CDS	peg.747	Q7A_763	775511	775777	267	+	hypothetical protein	hypothetical protein; AFI83608.1	1325	952	1301	687	1358	2741	1195	1312	1300	CDS	peg.694	700734	701000	267	+	hypothetical protein	CDW43_RS03365	CDW43_RS03365	hypothetical protein	hypothetical protein			530	471	1306	1089	1401	741	766	798	12673		4962.55	3565.54	4872.66	2573.03	5086.14	10265.9	4475.66	4913.86	4868.91
CDS	peg.748	Q7A_764	775808	776026	219	+	hypothetical protein	hypothetical protein; AFI83609.1	371	151	277	172	408	875	556	621	622	CDS	peg.695	701031	701249	219	+	hypothetical protein	CDW43_RS03370	CDW43_RS03370	hypothetical protein	hypothetical protein			126	90	282	311	432	206	463	440	6167		1694.06	689.498	1264.84	785.388	1863.01	3995.43	2538.81	2835.62	2840.18
CDS	peg.749	Q7A_765	776199	776906	708	+	PepSY-associated TM helix	peptidase; AFI83610.1	9460	5995	8910	8899	8467	15326	4286	3982	3950	CDS	peg.696	701422	702129	708	+	PepSY-associated TM helix	CDW43_RS03375	CDW43_RS03375	hypothetical protein	hypothetical protein			3963	3343	11212	10588	13559	6768	4506	5021	2457		13361.6	8467.51	12584.7	12569.2	11959	21646.9	6053.67	5624.29	5579.1
CDS	peg.750	Q7A_766	776953	777909	957	+	Conserved protein	hypothetical protein; AFI83611.1	8831	6119	8911	10252	8240	14554	7576	10754	10978	CDS	peg.697	702176	703132	957	+	Conserved protein	CDW43_RS03380	CDW43_RS03380	hypothetical protein	hypothetical protein			3431	2882	14099	11737	15615	8337	6568	7324	2125		9227.8	6393.94	9311.39	10712.6	8610.24	15207.9	7916.41	11237.2	11471.3
CDS	peg.751	Q7A_767	777906	779372	1467	+	6-phosphogluconate dehydrogenase, decarboxylating (EC 1.1.1.44)	phosphogluconate dehydrogenase (NADP(+)-dependent%2C decarboxylating); AFI83612.1	23813	14882	19817	19055	19217	33216	14656	18328	18020	CDS	peg.698	703129	704595	1467	+	6-phosphogluconate dehydrogenase, decarboxylating (EC 1.1.1.44)	CDW43_RS03385	CDW43_RS03385	decarboxylating NADP(+)-dependent phosphogluconate dehydrogenase	decarboxylating NADP(+)-dependent phosphogluconate dehydrogenase			8967	7090	26794	26817	34493	15836	9832	10977	3687		16232.4	10144.5	13508.5	12989.1	13099.5	22642.1	9990.46	12493.5	12283.6
CDS	peg.752	Q7A_768	779432	780298	867	-	Outer membrane protein	hypothetical protein; AFI83613.2	3766	2337	3500	2443	2071	4958	4142	2750	3258	CDS	peg.699	704655	705521	867	-	Outer membrane protein	CDW43_RS03390	CDW43_RS03390	SdiA-regulated domain-containing protein	SdiA-regulated domain-containing protein			1804	1311	3259	2448	3963	2168	4653	4347	962		4343.71	2695.5	4036.91	2817.76	2388.7	5718.57	4777.39	3171.86	3757.79
CDS	peg.753	Q7A_769	780424	780855	432	-	hypothetical protein	hypothetical protein; AFI83614.1	3604	2479	3460	3619	2981	5400	1740	1673	1798	CDS	peg.700	705647	706078	432	-	hypothetical protein	CDW43_RS03395	CDW43_RS03395	DUF6524 family protein	DUF6524 family protein			1533	1095	3784	3458	4428	2550	2648	2632	579		8342.59	5738.43	8009.26	8377.31	6900.46	12500	4027.78	3872.69	4162.04
CDS	peg.754	Q7A_770	780882	781097	216	-	Acylphosphate phosphohydrolase (EC 3.6.1.7), putative	acylphosphatase; AFI83615.2	1537	866	1259	1240	1119	2129	1576	1570	1761	CDS	peg.701	706105	706320	216	-	Acylphosphate phosphohydrolase (EC 3.6.1.7), putative	CDW43_RS03400	CDW43_RS03400	acylphosphatase	acylphosphatase			610	469	1630	1437	1882	902	2561	2364	535		7115.74	4009.26	5828.7	5740.74	5180.56	9856.48	7296.3	7268.52	8152.78
CDS	peg.755	Q7A_771	781517	782302	786	-	hypothetical protein	hypothetical protein; AFI83616.1	6559	4500	6931	5256	4394	9730	3541	3521	3828	CDS	peg.702	706740	707294	555	-	hypothetical protein	CDW43_RS03405	#N/A	hypothetical protein	#N/A			1986	1748	6319	4019	5954	3614	4501	4395	930		8344.78	5725.19	8818.07	6687.02	5590.33	12379.1	4505.09	4479.64	4870.23
CDS	peg.756	Q7A_772	782370	783239	870	-	Guanosine-3',5'-bis(Diphosphate) 3'-pyrophosphohydrolase (EC 3.1.7.2)	guanosine-3'%2C5'-bis(diphosphate) 3'-pyrophosphohydrolase; AFI83617.1	5598	3994	6032	6543	4951	9746	2919	2985	3559	CDS	peg.703	707593	708462	870	-	Guanosine-3',5'-bis(Diphosphate) 3'-pyrophosphohydrolase (EC 3.1.7.2)	CDW43_RS03410	CDW43_RS03410	HD domain-containing protein	HD domain-containing protein			2171	1701	5205	5507	7023	3823	3535	3713	662		6434.48	4590.8	6933.33	7520.69	5690.8	11202.3	3355.17	3431.03	4090.8
CDS	peg.757	Q7A_773	783267	784232	966	-	hypothetical protein	hypothetical protein; AFI83618.1	2488	2324	3133	3837	5104	7293	5848	6398	7891	CDS	peg.704	708490	709455	966	-	hypothetical protein	CDW43_RS03415	CDW43_RS03415	hypothetical protein	hypothetical protein			1076	935	2915	4970	4361	2324	4520	4584	1226		2575.57	2405.8	3243.27	3972.05	5283.64	7549.69	6053.83	6623.19	8168.74
CDS	peg.758	Q7A_774	784619	785377	759	+	hypothetical protein	hypothetical protein; AFI83619.1	4146	3210	4598	3556	2882	6290	3338	2772	2855	CDS	peg.705	709842	710600	759	+	hypothetical protein	CDW43_RS03420	CDW43_RS03420	hypothetical protein	hypothetical protein			1502	1456	5446	5524	6617	3579	4680	4631	1040		5462.45	4229.25	6057.97	4685.11	3797.1	8287.22	4397.89	3652.17	3761.53
CDS	peg.759	#N/A	785361	785528	168	+	hypothetical protein	#N/A	3220	2196	3275	2575	1909	4292	797	597	707	CDS	peg.706	710584	710742	159	+	hypothetical protein	#N/A	#N/A	#N/A	#N/A			1070	958	3706	3129	4220	2330	1139	1152	221		19166.7	13071.4	19494	15327.4	11363.1	25547.6	4744.05	3553.57	4208.33
CDS	peg.760	Q7A_777	785872	786273	402	-	hypothetical protein	hypothetical protein; AFI83622.2	7225	6082	8064	6825	5058	10976	4308	3921	4090	CDS	peg.707	711067	711468	402	-	hypothetical protein	CDW43_RS03425	#N/A	hypothetical protein	#N/A			2938	2643	10273	11916	13866	7163	5320	5282	1255		17972.6	15129.4	20059.7	16977.6	12582.1	27303.5	10716.4	9753.73	10174.1
CDS	peg.761	Q7A_778	786498	787136	639	-	hypothetical protein	hypothetical protein; AFI83623.1	6570	5800	7528	6011	4392	10115	6433	6072	6238	CDS	peg.708	711693	712331	639	-	hypothetical protein	CDW43_RS03430	CDW43_RS03430	hypothetical protein	hypothetical protein			2774	2296	9003	14614	14937	6847	6598	6976	2499		10281.7	9076.68	11780.9	9406.89	6873.24	15829.4	10067.3	9502.35	9762.13
CDS	peg.762	Q7A_779	787748	789325	1578	-	GMP synthase [glutamine-hydrolyzing] (EC 6.3.5.2)	GMP synthase (glutamine-hydrolyzing); AFI83624.1	36084	23062	34561	53963	36565	60170	44265	43376	43138	CDS	peg.765	765775	767352	1578	-	GMP synthase [glutamine-hydrolyzing] (EC 6.3.5.2)	CDW43_RS03695	CDW43_RS03695	glutamine-hydrolyzing GMP synthase	glutamine-hydrolyzing GMP synthase			15656	12455	29039	20084	30804	17261	23060	22594	2603		22866.9	14614.7	21901.8	34197.1	23171.7	38130.5	28051.3	27488	27337.1
CDS	peg.763	Q7A_780	789386	790849	1464	-	Inosine-5'-monophosphate dehydrogenase (EC 1.1.1.205)	IMP dehydrogenase; AFI83625.1	43830	24159	36426	57227	46564	65929	108108	122712	127006	CDS	peg.766	767414	768877	1464	-	Inosine-5'-monophosphate dehydrogenase (EC 1.1.1.205)	CDW43_RS03700	CDW43_RS03700	IMP dehydrogenase	IMP dehydrogenase			14982	12629	27836	23059	31902	16313	30216	35652	5530		29938.5	16502	24881.1	39089.5	31806	45033.5	73844.3	83819.7	86752.7
CDS	peg.764	Q7A_781	790912	792414	1503	+	Exodeoxyribonuclease VII large subunit (EC 3.1.11.6)	exodeoxyribonuclease VII large subunit; AFI83626.1	13692	9312	13115	15220	13090	21078	8435	8562	8600	CDS	peg.767	768940	770442	1503	+	Exodeoxyribonuclease VII large subunit (EC 3.1.11.6)	CDW43_RS03705	CDW43_RS03705	exodeoxyribonuclease VII large subunit	exodeoxyribonuclease VII large subunit			6083	5113	13230	13778	17905	9292	7237	7769	1453		9109.78	6195.61	8725.88	10126.4	8709.25	14024	5612.11	5696.61	5721.89
CDS	peg.765	Q7A_782	792462	793247	786	+	Peptidase, M23/M37 family	peptidase M23; AFI83627.1	6479	3456	5352	6389	5271	9305	4447	4481	4352	CDS	peg.768	770490	771275	786	+	Peptidase, M23/M37 family	#N/A	CDW43_RS03710	#N/A	peptidoglycan DD-metalloendopeptidase family protein			2739	2072	5604	4304	6730	3371	2985	3320	409		8243	4396.95	6809.16	8128.5	6706.11	11838.4	5657.76	5701.02	5536.9
CDS	peg.766	Q7A_783	793229	795913	2685	-	diguanylate cyclase/phosphodiesterase (GGDEF & EAL domains) with PAS/PAC sensor(s)	myristoyl transferase; AFI83628.1	13159	9067	13248	14068	10460	20564	10722	10905	11462	CDS	peg.769	771257	773941	2685	-	diguanylate cyclase/phosphodiesterase (GGDEF & EAL domains) with PAS/PAC sensor(s)	CDW43_RS03715	CDW43_RS03715	ABC transporter substrate-binding protein	ABC transporter substrate-binding protein			4649	3742	15226	14246	18539	10033	6845	8896	1674		4900.93	3376.91	4934.08	5239.48	3895.72	7658.85	3993.3	4061.45	4268.9
CDS	peg.767	Q7A_784	796308	797033	726	-	Lipopolysaccharide ABC transporter, ATP-binding protein LptB	ABC transporter ATP-binding protein; AFI83629.1	12642	8332	12181	11464	8768	16366	5997	6049	6491	CDS	peg.770	774335	775060	726	-	Lipopolysaccharide ABC transporter, ATP-binding protein LptB	CDW43_RS03720	CDW43_RS03720	LPS export ABC transporter ATP-binding protein	LPS export ABC transporter ATP-binding protein			4174	3336	10328	6273	10095	5879	5122	5081	469		17413.2	11476.6	16778.2	15790.6	12077.1	22542.7	8260.33	8331.96	8940.77
CDS	peg.768	Q7A_785	797047	797856	810	-	LptA, protein essential for LPS transport across the periplasm	lipopolysaccharide transport periplasmic protein LptA; AFI83630.1	14005	9166	13033	12722	10424	19577	13496	14545	16612	CDS	peg.771	775074	775883	810	-	LptA, protein essential for LPS transport across the periplasm	CDW43_RS03725	CDW43_RS03725	lipopolysaccharide transport periplasmic protein LptA	lipopolysaccharide transport periplasmic protein LptA			3796	3471	12558	10735	13840	7185	8894	8998	1637		17290.1	11316	16090.1	15706.2	12869.1	24169.1	16661.7	17956.8	20508.6
CDS	peg.769	Q7A_786	797837	798340	504	-	Uncharacterized protein YrbK clustered with lipopolysaccharide transporters	LPS export ABC transporter periplasmic protein LptC; AFI83631.1	7545	5562	7512	7767	6259	11733	9980	10603	11428	CDS	peg.772	775864	776367	504	-	Uncharacterized protein YrbK clustered with lipopolysaccharide transporters	CDW43_RS03730	#N/A	LPS export ABC transporter periplasmic protein LptC	#N/A			2469	2230	7458	6931	8078	4466	6081	6161	1276		14970.2	11035.7	14904.8	15410.7	12418.7	23279.8	19801.6	21037.7	22674.6
CDS	peg.770	Q7A_787	798390	798911	522	-	3-deoxy-D-manno-octulosonate 8-phosphate phosphatase (EC 3.1.3.45)	3-deoxy-D-manno-octulosonate 8-phosphate phosphatase; AFI83632.1	8664	5855	8425	7656	6459	12374	6587	6445	6842	CDS	peg.773	776417	776938	522	-	3-deoxy-D-manno-octulosonate 8-phosphate phosphatase (EC 3.1.3.45)	CDW43_RS03735	CDW43_RS03735	3-deoxy-manno-octulosonate-8-phosphatase KdsC	3-deoxy-manno-octulosonate-8-phosphatase KdsC			3338	2824	8521	7569	9182	5001	5143	5216	1073		16597.7	11216.5	16139.8	14666.7	12373.6	23705	12618.8	12346.7	13107.3
CDS	peg.771	Q7A_788	798927	799904	978	-	Arabinose 5-phosphate isomerase (EC 5.3.1.13)	KpsF/GutQ family sugar-phosphate isomerase; AFI83633.1	18398	11214	17466	16292	14088	25125	12643	12182	12450	CDS	peg.774	776954	777931	978	-	Arabinose 5-phosphate isomerase (EC 5.3.1.13)	CDW43_RS03740	CDW43_RS03740	KpsF/GutQ family sugar-phosphate isomerase	KpsF/GutQ family sugar-phosphate isomerase			7860	6305	16123	11409	17047	8860	8952	8586	1646		18811.9	11466.3	17858.9	16658.5	14404.9	25690.2	12927.4	12456	12730.1
CDS	peg.772	Q7A_789	799901	800887	987	-	Inner membrane protein YrbG, predicted calcium/sodium:proton antiporter	calcium/sodium antiporter; AFI83634.1	9502	5515	8429	8139	7120	11994	8931	8189	8477	CDS	peg.775	777928	778914	987	-	Inner membrane protein YrbG, predicted calcium/sodium:proton antiporter	CDW43_RS03745	CDW43_RS03745	calcium/sodium antiporter	calcium/sodium antiporter			4475	3280	8123	5073	7301	4211	7459	7235	1093		9627.15	5587.64	8540.02	8246.2	7213.78	12152	9048.63	8296.86	8588.65
CDS	peg.773	Q7A_790	800983	801711	729	-	Nucleoside ABC transporter, periplasmic nucleoside-binding protein	ABC transporter; AFI83635.1	52664	33587	48971	43423	39049	66031	46649	39105	41982	CDS	peg.776	779010	779738	729	-	Nucleoside ABC transporter, periplasmic nucleoside-binding protein	CDW43_RS03750	CDW43_RS03750	VacJ family lipoprotein	VacJ family lipoprotein			24802	20852	48717	37066	50396	27531	48527	42645	10224		72241.4	46072.7	67175.6	59565.2	53565.2	90577.5	63990.4	53642	57588.5
CDS	peg.774	Q7A_791	801840	802886	1047	-	Glycosyltransferase	alpha-mannosyltransferase; AFI83636.1	973	498	788	827	768	1335	1095	1048	1201	CDS	peg.777	779867	780913	1047	-	Glycosyltransferase	CDW43_RS03755	CDW43_RS03755	glycosyltransferase family 1 protein	glycosyltransferase family 1 protein			272	253	727	583	1071	418	623	732	139		929.322	475.645	752.627	789.876	733.524	1275.07	1045.85	1000.96	1147.09
CDS	peg.775	Q7A_792	802886	803680	795	-	Ser/Thr protein phosphatase family protein, UDP-2,3-diacylglucosamine hydrolase (EC 3.6.1.54) homolog	UDP-2%2C3-diacylglucosamine hydrolase; AFI83637.1	998	515	868	867	624	1395	1786	1615	2180	CDS	peg.778	780913	781707	795	-	Ser/Thr protein phosphatase family protein, UDP-2,3-diacylglucosamine hydrolase (EC 3.6.1.54) homolog	CDW43_RS03760	CDW43_RS03760	UDP-2,3-diacylglucosamine diphosphatase	UDP-2,3-diacylglucosamine diphosphatase			270	183	824	570	1501	421	1196	1520	250		1255.35	647.799	1091.82	1090.57	784.906	1754.72	2246.54	2031.45	2742.14
CDS	peg.776	Q7A_793	803820	805859	2040	+	Oligopeptidase A (EC 3.4.24.70)	oligopeptidase A; AFI83638.2	15553	11221	15104	11299	10446	20309	11616	10971	10768	CDS	peg.779	781766	783886	2121	+	Oligopeptidase A (EC 3.4.24.70)	#N/A	CDW43_RS03765	#N/A	oligopeptidase A			5520	5145	15681	13026	17684	9582	8232	9415	2477		7624.02	5500.49	7403.92	5538.73	5120.59	9955.39	5694.12	5377.94	5278.43
CDS	peg.777	Q7A_794	805948	806364	417	-	hypothetical protein	hypothetical protein; AFI83639.1	9225	6052	8819	5764	5646	11699	16789	18309	24114	CDS	peg.780	783975	784391	417	-	hypothetical protein	CDW43_RS03770	CDW43_RS03770	hypothetical protein	hypothetical protein			3930	3436	12596	9286	12709	6247	10323	12563	2900		22122.3	14513.2	21148.7	13822.5	13539.6	28055.2	40261.4	43906.5	57827.3
CDS	peg.778	#N/A	806444	806587	144	+	hypothetical protein	#N/A	1671	1318	1613	1227	1536	2435	3526	4146	5542	CDS	peg.781	784471	784614	144	+	hypothetical protein	#N/A	#N/A	#N/A	#N/A			825	694	2066	1594	1951	925	1861	2297	512		11604.2	9152.78	11201.4	8520.83	10666.7	16909.7	24486.1	28791.7	38486.1
CDS	peg.779	Q7A_796	806624	806890	267	-	Hypothetical Zinc-finger containing protein	DksA/TraR family C4-type zinc finger protein; AFI83641.1	3898	3300	4001	2941	4016	5685	3111	3392	5446	CDS	peg.782	784651	784917	267	-	Hypothetical Zinc-finger containing protein	CDW43_RS03775	CDW43_RS03775	DksA/TraR family C4-type zinc finger protein	DksA/TraR family C4-type zinc finger protein			2204	1653	3881	4277	4853	2238	1218	1959	550		14599.3	12359.6	14985	11015	15041.2	21292.1	11651.7	12704.1	20397
CDS	peg.780	Q7A_797	807401	807664	264	-	YoeB toxin protein	Txe/YoeB family addiction module toxin; AFI83642.1	805	517	888	1287	957	1532	1703	1741	2831	CDS	peg.783	785428	785691	264	-	YoeB toxin protein	CDW43_RS03785	CDW43_RS03785	Txe/YoeB family addiction module toxin	Txe/YoeB family addiction module toxin			409	287	1083	954	1321	771	787	724	169		3049.24	1958.33	3363.64	4875	3625	5803.03	6450.76	6594.7	10723.5
CDS	peg.781	Q7A_798	807657	807911	255	-	YefM protein (antitoxin to YoeB)	type II toxin-antitoxin system prevent-host-death family antitoxin; AFI83643.1	791	541	937	1246	897	1435	1644	1652	2778	CDS	peg.784	785684	785938	255	-	YefM protein (antitoxin to YoeB)	CDW43_RS03790	CDW43_RS03790	type II toxin-antitoxin system prevent-host-death family antitoxin	type II toxin-antitoxin system prevent-host-death family antitoxin			370	295	1096	996	1332	768	790	738	166		3101.96	2121.57	3674.51	4886.27	3517.65	5627.45	6447.06	6478.43	10894.1
CDS	peg.783	Q7A_03315	808548	808772	225	-	hypothetical protein	hypothetical protein; ASF49076.1	7870	5012	7580	5227	3588	7960	5969	6359	7235	CDS	peg.785	786575	786799	225	-	hypothetical protein	CDW43_RS03795	CDW43_RS03795	hypothetical protein	hypothetical protein			3433	2747	12695	12764	18849	9540	3490	3690	4030		34977.8	22275.6	33688.9	23231.1	15946.7	35377.8	26528.9	28262.2	32155.6
CDS	peg.784	Q7A_800	809034	810518	1485	+	3-polyprenyl-4-hydroxybenzoate carboxy-lyase (EC 4.1.1.-)	3-octaprenyl-4-hydroxybenzoate decarboxylase; AFI83645.1	9927	5262	8706	7898	7359	12797	10882	10954	11915	CDS	peg.786	787061	788545	1485	+	3-polyprenyl-4-hydroxybenzoate carboxy-lyase (EC 4.1.1.-)	CDW43_RS03800	CDW43_RS03800	4-hydroxy-3-polyprenylbenzoate decarboxylase	4-hydroxy-3-polyprenylbenzoate decarboxylase			4123	3084	7728	6845	9486	4416	6193	6937	1789		6684.85	3543.43	5862.63	5318.52	4955.56	8617.51	7327.95	7376.43	8023.57
CDS	peg.785	Q7A_801	810507	810809	303	-	Putative inner membrane protein	hypothetical protein; AFI83646.2	8031	4409	7565	8826	7101	12980	4522	4481	5497	CDS	peg.787	788534	788836	303	-	Putative inner membrane protein	CDW43_RS03805	#N/A	MAPEG family protein	#N/A			2772	2161	5531	3111	4923	3092	2892	3347	725		26505	14551.2	24967	29128.7	23435.6	42838.3	14924.1	14788.8	18141.9
CDS	peg.786	Q7A_802	810939	812687	1749	-	Major facilitator superfamily	MFS transporter; AFI83647.1	50792	30224	43870	61643	44334	85259	4883	4984	6473	CDS	peg.788	788966	790597	1632	-	Major facilitator superfamily	CDW43_RS03810	#N/A	OFA family MFS transporter	#N/A			12321	10216	33610	17436	33478	19578	2331	2900	476		29040.6	17280.7	25082.9	35244.7	25348.2	48747.3	2791.88	2849.63	3700.97
CDS	peg.787	Q7A_803	812756	813004	249	-	hypothetical protein	formate dehydrogenase; AFI83648.1	26280	16412	25943	36415	21261	43506	364	326	410	CDS	peg.789	790783	791031	249	-	hypothetical protein	CDW43_RS03815	CDW43_RS03815	formate dehydrogenase subunit delta	formate dehydrogenase subunit delta			6131	5873	24067	24770	32915	19732	312	393	48		105542	65911.6	104189	146245	85385.5	174723	1461.85	1309.24	1646.59
CDS	peg.788	Q7A_804	813016	813840	825	-	Formate dehydrogenase chain D (EC 1.2.1.2)	sulfurtransferase FdhD; AFI83649.1	63028	43779	60790	104285	67984	121443	2030	1937	2105	CDS	peg.790	791043	791726	684	-	Formate dehydrogenase chain D (EC 1.2.1.2)	CDW43_RS03820	#N/A	formate dehydrogenase accessory sulfurtransferase FdhD	#N/A			14119	13244	49226	60804	75731	41089	821	971	140		76397.6	53065.5	73684.8	126406	82404.8	147204	2460.61	2347.88	2551.52
CDS	peg.789	Q7A_805	813837	816716	2880	-	NAD-dependent formate dehydrogenase alpha subunit	formate dehydrogenase subunit alpha; AFI83650.1	264091	171909	237999	435241	325247	505471	9908	10454	11617	CDS	peg.791	791864	794743	2880	-	NAD-dependent formate dehydrogenase alpha subunit	CDW43_RS03825	CDW43_RS03825	formate dehydrogenase subunit alpha	formate dehydrogenase subunit alpha			75358	68008	241179	306216	375846	187949	5385	6641	1365		91698.3	59690.6	82638.5	151125	112933	175511	3440.28	3629.86	4033.68
CDS	peg.790	Q7A_806	816720	818267	1548	-	NAD-dependent formate dehydrogenase beta subunit	formate dehydrogenase; AFI83651.1	177572	115493	157646	298461	217937	337059	2504	2512	2822	CDS	peg.792	794747	796294	1548	-	NAD-dependent formate dehydrogenase beta subunit	CDW43_RS03830	CDW43_RS03830	formate dehydrogenase beta subunit	formate dehydrogenase beta subunit			54813	47261	150564	199420	254078	124883	1622	2140	270		114711	74607.9	101839	192804	140786	217738	1617.57	1622.74	1823
CDS	peg.791	Q7A_807	818267	818758	492	-	NAD-dependent formate dehydrogenase gamma subunit	formate dehydrogenase subunit gamma; AFI83652.1	54899	38279	49461	91145	67672	98427	1423	1398	1479	CDS	peg.793	796294	796785	492	-	NAD-dependent formate dehydrogenase gamma subunit	CDW43_RS03835	CDW43_RS03835	formate dehydrogenase subunit gamma	formate dehydrogenase subunit gamma			18864	16414	58075	89718	105260	49618	1128	1224	177		111583	77802.8	100530	185254	137545	200055	2892.28	2841.46	3006.1
CDS	peg.792	Q7A_808	818954	819985	1032	-	Molybdopterin biosynthesis protein MoeA / Periplasmic molybdate-binding domain	LysR family transcriptional regulator; AFI83653.1	7181	4564	7143	7270	6269	11179	4504	4553	5103	CDS	peg.794	796981	798156	1176	-	Molybdopterin biosynthesis protein MoeA / Periplasmic molybdate-binding domain	CDW43_RS03840	#N/A	helix-turn-helix transcriptional regulator	#N/A			2681	2453	8686	7362	9955	5632	6132	5925	707		6958.33	4422.48	6921.51	7044.57	6074.61	10832.4	4364.34	4411.82	4944.77
CDS	peg.793	Q7A_809	820099	820533	435	-	Molybdenum cofactor biosynthesis protein MoaE	molybdopterin converting factor; AFI83654.1	11140	6577	9405	9980	9556	13503	10498	10497	10900	CDS	peg.795	798126	798560	435	-	Molybdenum cofactor biosynthesis protein MoaE	CDW43_RS03845	CDW43_RS03845	molybdenum cofactor biosynthesis protein MoaE	molybdenum cofactor biosynthesis protein MoaE			3455	3198	9457	11750	13849	6606	6374	7034	1576		25609.2	15119.5	21620.7	22942.5	21967.8	31041.4	24133.3	24131	25057.5
CDS	peg.794	Q7A_810	820536	820763	228	-	Molybdenum cofactor biosynthesis protein MoaD	molybdopterin synthase sulfur carrier subunit; AFI83655.1	10813	7112	10008	8934	8062	11724	8123	8151	8705	CDS	peg.796	798563	798790	228	-	Molybdenum cofactor biosynthesis protein MoaD	CDW43_RS03850	CDW43_RS03850	MoaD/ThiS family protein	MoaD/ThiS family protein			3974	3470	9397	11757	13737	7180	5358	5679	1478		47425.4	31193	43894.7	39184.2	35359.6	51421.1	35627.2	35750	38179.8
CDS	peg.795	Q7A_811	820809	821288	480	+	Molybdenum cofactor biosynthesis protein MoaC	cyclic pyranopterin monophosphate synthase MoaC; AFI83656.1	8666	5094	7120	7147	6290	10892	5038	4926	5044	CDS	peg.797	798836	799315	480	+	Molybdenum cofactor biosynthesis protein MoaC	CDW43_RS03855	CDW43_RS03855	cyclic pyranopterin monophosphate synthase MoaC	cyclic pyranopterin monophosphate synthase MoaC			3548	3038	8338	6277	9244	4549	4778	4936	1507		18054.2	10612.5	14833.3	14889.6	13104.2	22691.7	10495.8	10262.5	10508.3
CDS	peg.796	Q7A_812	821432	822757	1326	+	Phosphate-specific outer membrane porin OprP Pyrophosphate-specific outer membrane porin OprO	porin; AFI83657.1	6555	3838	6468	6575	5730	9780	4149	3959	4713	CDS	peg.798	799459	800784	1326	+	Phosphate-specific outer membrane porin OprP Pyrophosphate-specific outer membrane porin OprO	CDW43_RS03860	CDW43_RS03860	porin	porin			2357	2058	6543	3373	5488	3217	3485	3524	922		4943.44	2894.42	4877.83	4958.52	4321.27	7375.57	3128.96	2985.67	3554.3
CDS	peg.797	Q7A_813	823054	824388	1335	+	Phosphate-specific outer membrane porin OprP Pyrophosphate-specific outer membrane porin OprO	porin; AFI83658.1	9687	6509	9642	9385	7919	15167	6441	6135	6857	CDS	peg.799	801080	802414	1335	+	Phosphate-specific outer membrane porin OprP Pyrophosphate-specific outer membrane porin OprO	CDW43_RS03865	CDW43_RS03865	porin	porin			3655	3719	13962	12173	14908	7449	4436	4422	1665		7256.18	4875.66	7222.47	7029.96	5931.84	11361	4824.72	4595.51	5136.33
CDS	peg.798	Q7A_814	824472	825278	807	-	ABC-type tungstate transport system, periplasmic binding protein	tungsten ABC transporter substrate-binding protein; AFI83659.1	9046	7040	9446	10805	8544	16208	3116	3021	2840	CDS	peg.800	802498	803304	807	-	ABC-type tungstate transport system, periplasmic binding protein	CDW43_RS03870	CDW43_RS03870	substrate-binding domain-containing protein	substrate-binding domain-containing protein			3144	2723	11805	9779	13630	8024	2437	2869	639		11209.4	8723.67	11705.1	13389.1	10587.4	20084.3	3861.21	3743.49	3519.21
CDS	peg.799	Q7A_815	825399	826463	1065	-	FIG014328: hypothetical protein	hypothetical protein; AFI83660.1	11956	7898	11613	11999	10084	16974	7943	8193	8845	CDS	peg.801	803425	804489	1065	-	FIG014328: hypothetical protein	CDW43_RS03875	CDW43_RS03875	DUF2333 family protein	DUF2333 family protein			3654	3306	12658	10708	14832	8047	5654	6679	1820		11226.3	7415.96	10904.2	11266.7	9468.54	15938	7458.22	7692.96	8305.16
CDS	peg.800	Q7A_816	826727	827677	951	+	ABC transporter, ATP-binding protein	ABC transporter ATP-binding protein; AFI83661.1	18673	11513	16330	19794	16919	27664	14338	13905	15284	CDS	peg.802	804753	805703	951	+	ABC transporter, ATP-binding protein	CDW43_RS03880	CDW43_RS03880	ATP-binding cassette domain-containing protein	ATP-binding cassette domain-containing protein			7223	5862	16787	10249	18752	10693	7547	10585	1842		19635.1	12106.2	17171.4	20813.9	17790.7	29089.4	15076.8	14621.5	16071.5
CDS	peg.801	Q7A_817	827677	828417	741	+	gliding motility protein GldF	ABC transporter permease; AFI83662.1	11745	8389	11075	12921	11078	19346	9785	9407	10332	CDS	peg.803	805703	806443	741	+	gliding motility protein GldF	#N/A	CDW43_RS03885	#N/A	ABC transporter permease subunit			4315	3705	11061	5688	10930	6679	6619	7514	1195		15850.2	11321.2	14946	17437.2	14950.1	26108	13205.1	12695	13943.3
CDS	peg.802	Q7A_818	828433	830346	1914	+	gliding motility protein GldG	gliding motility protein GldG; AFI83663.1	18521	12899	17172	18394	15465	31122	17308	16089	17622	CDS	peg.804	806459	808372	1914	+	gliding motility protein GldG	CDW43_RS03890	CDW43_RS03890	Gldg family protein	Gldg family protein			6060	5008	19051	9515	16788	9786	10318	11285	1748		9676.59	6739.29	8971.79	9610.24	8079.94	16260.2	9042.84	8405.96	9206.9
CDS	peg.803	Q7A_819	830401	831513	1113	+	hypothetical protein	hypothetical protein; AFI83664.1	13389	8582	12545	12033	9448	19259	7202	6491	6952	CDS	peg.805	808427	809539	1113	+	hypothetical protein	CDW43_RS03895	CDW43_RS03895	DUF4340 domain-containing protein	DUF4340 domain-containing protein			3638	3163	13459	6019	10335	6632	5231	5881	693		12029.6	7710.69	11271.3	10811.3	8488.77	17303.7	6470.8	5831.99	6246.18
CDS	peg.804	Q7A_820	831575	832528	954	-	Chemotaxis protein CheV (EC 2.7.3.-)	chemotaxis protein CheV; AFI83665.1	9083	6850	8175	6293	7563	11562	5185	5162	5638	CDS	peg.806	809601	810554	954	-	Chemotaxis protein CheV (EC 2.7.3.-)	CDW43_RS03900	CDW43_RS03900	chemotaxis protein CheV	chemotaxis protein CheV			4116	3399	6944	7201	8885	4406	5997	5251	2827		9520.96	7180.29	8569.18	6596.44	7927.67	12119.5	5435.01	5410.9	5909.85
CDS	peg.805	Q7A_821	832656	833360	705	+	Flagellar basal-body P-ring formation protein FlgA	flagella basal body P-ring formation protein FlgA; AFI83666.1	5694	3772	4013	4940	6574	7705	13457	13183	11321	CDS	peg.807	810682	811386	705	+	Flagellar basal-body P-ring formation protein FlgA	CDW43_RS03905	CDW43_RS03905	flagellar basal body P-ring formation protein FlgA	flagellar basal body P-ring formation protein FlgA			2050	1597	1602	1401	2037	925	7361	17687	1119		8076.6	5350.35	5692.2	7007.09	9324.82	10929.1	19087.9	18699.3	16058.2
CDS	peg.806	Q7A_822	833447	833761	315	+	Negative regulator of flagellin synthesis FlgM	flagellar biosynthesis anti-sigma factor FlgM; AFI83667.1	10155	9083	8864	7862	10971	13083	14027	15519	22829	CDS	peg.808	811473	811787	315	+	Negative regulator of flagellin synthesis FlgM	CDW43_RS03910	CDW43_RS03910	flagellar biosynthesis anti-sigma factor FlgM	flagellar biosynthesis anti-sigma factor FlgM			4925	3828	2972	3375	3909	1857	12131	11329	3855		32238.1	28834.9	28139.7	24958.7	34828.6	41533.3	44530.2	49266.7	72473
CDS	peg.807	Q7A_823	833777	834265	489	+	Flagellar biosynthesis protein FlgN	flagellar protein FlgN; AFI83668.1	13926	11895	11244	12355	16236	19940	27636	27644	38237	CDS	peg.809	811803	812291	489	+	Flagellar biosynthesis protein FlgN	CDW43_RS03915	CDW43_RS03915	flagellar protein FlgN	flagellar protein FlgN			4940	4649	3947	4049	4877	2694	19423	27307	4031		28478.5	24325.2	22993.9	25265.8	33202.5	40777.1	56515.3	56531.7	78194.3
CDS	peg.808	Q7A_824	834296	835309	1014	-	Ferrochelatase, protoheme ferro-lyase (EC 4.99.1.1)	ferrochelatase; AFI83669.1	13036	9353	11086	11683	12846	17675	18575	18310	26685	CDS	peg.810	812322	813335	1014	-	Ferrochelatase, protoheme ferro-lyase (EC 4.99.1.1)	CDW43_RS03920	CDW43_RS03920	ferrochelatase	ferrochelatase			4870	4086	9825	11535	14354	7111	11881	17062	2179		12856	9223.87	10932.9	11521.7	12668.6	17431	18318.5	18057.2	26316.6
CDS	peg.809	Q7A_825	835318	836232	915	-	Cell division inhibitor	epimerase; AFI83670.1	2232	1462	1922	1880	2228	2955	3454	3407	6479	CDS	peg.811	813344	814258	915	-	Cell division inhibitor	CDW43_RS03925	CDW43_RS03925	TIGR01777 family oxidoreductase	TIGR01777 family oxidoreductase			999	769	2522	4486	4591	1969	2142	3086	620		2439.34	1597.81	2100.55	2054.64	2434.97	3229.51	3774.86	3723.5	7080.87
CDS	peg.810	Q7A_826	836344	837288	945	+	COG1683: Uncharacterized conserved protein / FIG143828: Hypothetical protein YbgA	hypothetical protein; AFI83671.1	1882	1128	1784	1502	1684	2694	2121	1905	2908	CDS	peg.812	814370	815314	945	+	COG1683: Uncharacterized conserved protein / FIG143828: Hypothetical protein YbgA	CDW43_RS03930	CDW43_RS03930	DUF1722 domain-containing protein	DUF1722 domain-containing protein			758	585	2163	3067	3217	1555	1518	2281	357		1991.53	1193.65	1887.83	1589.42	1782.01	2850.79	2244.44	2015.87	3077.25
CDS	peg.811	Q7A_827	837467	838456	990	+	Acetylspermidine deacetylase (EC 3.5.1.48) Deacetylases, including yeast histone deacetylase and acetoin utilization protein	histone deacetylase; AFI83672.1	1784	1231	1767	1667	1715	2623	2560	2649	3759	CDS	peg.813	815493	816482	990	+	Acetylspermidine deacetylase (EC 3.5.1.48) Deacetylases, including yeast histone deacetylase and acetoin utilization protein	CDW43_RS03935	CDW43_RS03935	histone deacetylase	histone deacetylase			841	664	1910	2227	2523	1277	1347	2051	468		1802.02	1243.43	1784.85	1683.84	1732.32	2649.49	2585.86	2675.76	3796.97
CDS	peg.812	Q7A_828	838565	839452	888	+	Enoyl-CoA hydratase (EC 4.2.1.17) / Delta(3)-cis-delta(2)-trans-enoyl-CoA isomerase (EC 5.3.3.8) / 3-hydroxyacyl-CoA dehydrogenase (EC 1.1.1.35) / 3-hydroxybutyryl-CoA epimerase (EC 5.1.2.3)	enoyl-CoA hydratase; AFI83673.1	12438	11048	9260	8655	12854	16865	18167	17057	13991	CDS	peg.814	816591	817478	888	+	Enoyl-CoA hydratase (EC 4.2.1.17)	#N/A	CDW43_RS03940	#N/A	crotonase/enoyl-CoA hydratase family protein			4583	4384	2454	1723	2687	1594	7365	20949	1182		14006.8	12441.4	10427.9	9746.62	14475.2	18992.1	20458.3	19208.3	15755.6
CDS	peg.813	Q7A_829	839658	842234	2577	-	sensor histidine kinase	hybrid sensor histidine kinase/response regulator; AFI83674.1	24618	16644	24156	21963	18531	36414	13188	12957	13249	CDS	peg.815	817684	820239	2556	-	sensor histidine kinase	CDW43_RS03945	#N/A	ATP-binding protein	#N/A			7654	6406	23201	12225	20043	12634	14141	15538	2142		9552.97	6458.67	9373.69	8522.7	7190.92	14130.4	5117.58	5027.94	5141.25
CDS	peg.814	Q7A_830	842224	843339	1116	-	Response regulator	two-component system response regulator; AFI83675.1	16195	10607	16169	12724	11024	21395	7971	7559	7573	CDS	peg.816	820250	821365	1116	-	Response regulator	CDW43_RS03950	CDW43_RS03950	response regulator	response regulator			4707	4545	16461	14450	18794	10235	11344	10762	2939		14511.6	9504.48	14488.4	11401.4	9878.14	19171.1	7142.47	6773.3	6785.84
CDS	peg.815	Q7A_831	843657	844025	369	+	Sirohydrochlorin cobaltochelatase (EC 4.99.1.3)	cobalamin biosynthesis protein CbiX; AFI83676.1	4364	2464	4000	2553	2613	5825	1085	870	974	CDS	peg.817	821649	822017	369	+	Sirohydrochlorin cobaltochelatase (EC 4.99.1.3)	CDW43_RS03955	CDW43_RS03955	CbiX/SirB N-terminal domain-containing protein	CbiX/SirB N-terminal domain-containing protein			724	527	1890	1772	2109	1003	1069	1192	224		11826.6	6677.51	10840.1	6918.7	7081.3	15785.9	2940.38	2357.72	2639.57
CDS	peg.816	Q7A_832	844076	844294	219	-	hypothetical protein	hypothetical protein; AFI83677.1	3245	1795	2893	1626	1789	4044	1544	1223	1289	CDS	peg.818	822068	822286	219	-	hypothetical protein	CDW43_RS03960	CDW43_RS03960	hypothetical protein	hypothetical protein			509	350	1391	924	1376	674	884	1046	127		14817.4	8196.35	13210	7424.66	8168.95	18465.8	7050.23	5584.47	5885.84
CDS		#N/A	844344	844945	602	-	hypothetical protein	#N/A	12162	8086	11000	4854	5730	11917	3211	2821	2943	CDS	peg.819	822336	822936	601	-	hypothetical protein	#N/A	#N/A	#N/A	#N/A			5194	3753	10260	8892	11652	6052	6316	5405	2109		20202.7	13431.9	18272.4	8063.12	9518.27	19795.7	5333.89	4686.05	4888.7
Ribow		0	844783	844860	78	+	cyclic di-GMP riboswitch class I	cyclic di-GMP riboswitch class I	4457	3033	4255	1685	1613	3346	868	788	829	Ribosw		822771	822848	78	+	cyclic di-GMP riboswitch class I	#N/A	#N/A	#N/A	#N/A			1812	1395	3393	3001	3777	2020	2338	1686	966		57141	38884.6	54551.3	21602.6	20679.5	42897.4	11128.2	10102.6	10628.2
CDS	peg.817	#N/A	844995	845219	225	-	hypothetical protein	#N/A	7594	5405	6712	1856	2409	4952	1356	1308	1273	CDS	peg.819	822986	823210	225	-	hypothetical protein	#N/A	#N/A	#N/A	#N/A			3025	2145	3472	3138	3826	1887	3721	2220	2001		33751.1	24022.2	29831.1	8248.89	10706.7	22008.9	6026.67	5813.33	5657.78
CDS	peg.818	#N/A	845218	845424	207	+	hypothetical protein	#N/A	7141	5234	5999	1644	2430	4931	825	920	758	CDS	peg.820	823209	823415	207	+	hypothetical protein	#N/A	CDW43_RS03970	#N/A	hypothetical protein			3419	2342	3361	3113	4144	2009	2751	1490	1501		34497.6	25285	28980.7	7942.03	11739.1	23821.3	3985.51	4444.44	3661.84
CDS	peg.819	Q7A_834	845530	847203	1674	-	Dihydroxy-acid dehydratase (EC 4.2.1.9)	dihydroxy-acid dehydratase; AFI83679.1	12346	7360	10988	10750	8247	15303	4825	4313	4227	CDS	peg.821	823521	825194	1674	-	Dihydroxy-acid dehydratase (EC 4.2.1.9)	CDW43_RS03975	CDW43_RS03975	dihydroxy-acid dehydratase	dihydroxy-acid dehydratase			5131	3863	14818	12082	17818	9582	4026	3950	1779		7375.15	4396.65	6563.92	6421.74	4926.52	9141.58	2882.32	2576.46	2525.09
CDS	peg.820	Q7A_835	847605	848612	1008	+	Beta-carotene ketolase (EC 1.14.-.-)	fatty acid desaturase; AFI83680.1	5980	3159	6511	9313	4329	9029	3903	4014	4577	CDS	peg.822	825595	826602	1008	+	Beta-carotene ketolase (EC 1.14.-.-)	CDW43_RS03980	CDW43_RS03980	fatty acid desaturase	fatty acid desaturase			3516	2754	14368	14787	21745	11344	3049	3490	811		5932.54	3133.93	6459.33	9239.09	4294.64	8957.34	3872.02	3982.14	4540.67
CDS	peg.821	Q7A_837	849659	850543	885	-	Mobile element protein	IS982 family transposase; ASF49078.1	4464	2534	3990	3956	3290	6209	3134	3182	3466	CDS	peg.845	858111	858995	885	-	Mobile element protein	CDW43_RS04135	CDW43_RS04135	IS982 family transposase	IS982 family transposase			1744	1487	4705	4846	6282	3329	2633	2760	680		5044.07	2863.28	4508.47	4470.06	3717.51	7015.82	3541.24	3595.48	3916.38
CDS	peg.822	Q7A_839	851048	851770	723	+	hypothetical protein	hypothetical protein; AFI83681.1	9771	7318	11041	9939	6242	13994	6953	6676	6929	CDS	peg.846	859500	860222	723	+	hypothetical protein	#N/A	CDW43_RS04145	#N/A	ArsR family transcriptional regulator			3249	3461	15326	14157	17773	9937	7462	8248	1943		13514.5	10121.7	15271.1	13746.9	8633.47	19355.5	9616.87	9233.75	9583.68
CDS	peg.823	Q7A_840	851754	852611	858	+	serine/threonine protein kinase	serine/threonine protein kinase; AFI83682.1	6465	4729	7743	6467	4312	9985	6335	6009	6281	CDS	peg.847	860206	861063	858	+	serine/threonine protein kinase	CDW43_RS04150	CDW43_RS04150	serine/threonine protein kinase	serine/threonine protein kinase			2034	1827	8951	6710	9314	5076	7266	7679	1204		7534.97	5511.66	9024.48	7537.3	5025.64	11637.5	7383.45	7003.5	7320.51
CDS	peg.824	#N/A	852614	853804	1191	+	hypothetical protein	#N/A	16163	11480	17242	15002	11623	24159	14978	15738	15558	CDS	peg.848	861066	862256	1191	+	hypothetical protein	CDW43_RS04155	CDW43_RS04155	hypothetical protein	hypothetical protein			6060	5264	21407	16433	23075	12366	16597	15378	2926		13570.9	9638.96	14476.9	12596.1	9759.03	20284.6	12576	13214.1	13063
CDS	peg.825	Q7A_842	853815	854543	729	-	Protein serine/threonine phosphatase PrpC, regulation of stationary phase	hypothetical protein; AFI83684.1	5063	3859	5554	4376	3223	7743	6182	6140	6294	CDS	peg.849	862267	862995	729	-	Protein serine/threonine phosphatase PrpC, regulation of stationary phase	CDW43_RS04160	CDW43_RS04160	protein phosphatase 2C domain-containing protein	protein phosphatase 2C domain-containing protein			1462	1528	6459	4987	6922	3792	7361	6857	898		6945.13	5293.55	7618.66	6002.74	4421.12	10621.4	8480.11	8422.5	8633.74
CDS	peg.826	Q7A_843	855164	855793	630	-	hypothetical protein	hypothetical protein; AFI83685.1	4020	2805	4281	3021	2579	5548	3390	3389	3766	CDS	peg.850	863616	864245	630	-	hypothetical protein	CDW43_RS04170	CDW43_RS04170	hypothetical protein	hypothetical protein			1244	1125	5139	3645	4512	2537	4658	4772	673		6380.95	4452.38	6795.24	4795.24	4093.65	8806.35	5380.95	5379.37	5977.78
CDS	peg.827	Q7A_844	855888	856634	747	-	Mobile element protein	transposase; AFI83686.1	3452	1283	2678	2841	1768	4207	2354	2327	2664	CDS	peg.851	864340	865086	747	-	Mobile element protein	CDW43_RS04175	CDW43_RS04175	IS21-like element helper ATPase IstB	IS21-like element helper ATPase IstB			1013	780	1672	1222	1840	967	1944	2337	332		4621.15	1717.54	3585.01	3803.21	2366.8	5631.86	3151.27	3115.13	3566.27
CDS	peg.828	Q7A_845	856646	858181	1536	-	Mobile element protein	IS21 family transposase; AFI83687.2	8809	4089	8089	11789	8307	13900	7220	8861	11304	CDS	peg.852	865098	866633	1536	-	Mobile element protein	CDW43_RS04180	#N/A	IS21 family transposase	#N/A			2567	1836	4155	4450	5633	2791	2644	3632	953		5735.03	2662.11	5266.28	7675.13	5408.2	9049.48	4700.52	5768.88	7359.38
CDS	peg.829	Q7A_846	858392	859276	885	-	hypothetical protein	hypothetical protein; AFI83688.1	2716	2055	3594	3950	2859	5339	4711	5062	6508	CDS	peg.853	866844	867728	885	-	hypothetical protein	CDW43_RS04185	CDW43_RS04185	competence protein	competence protein			956	930	4274	4750	5470	3022	3571	3812	1024		3068.93	2322.03	4061.02	4463.28	3230.51	6032.77	5323.16	5719.77	7353.67
CDS	peg.830	Q7A_847	859388	859879	492	-	FIG001353: Acetyltransferase	N-acetyltransferase; AFI83689.1	2779	1986	2948	3854	2939	4822	3845	3987	4942	CDS	peg.854	867840	868331	492	-	FIG001353: Acetyltransferase	CDW43_RS04190	CDW43_RS04190	GNAT family N-acetyltransferase	GNAT family N-acetyltransferase			901	804	3810	5037	6338	3324	2220	2400	1560		5648.37	4036.59	5991.87	7833.33	5973.58	9800.81	7815.04	8103.66	10044.7
CDS	peg.831	Q7A_03340	859870	859998	129	-	hypothetical protein	toxin-antitoxin system protein; ASF49081.1	2317	1605	2342	2861	2231	3806	2396	2514	3092	CDS	peg.855	868322	868450	129	-	hypothetical protein	CDW43_RS04195	#N/A	DUF1778 domain-containing protein	#N/A			884	769	3251	5073	6148	3485	1307	1503	1371		17961.2	12441.9	18155	22178.3	17294.6	29503.9	18573.6	19488.4	23969
CDS	peg.832	#N/A	860523	860678	156	-	hypothetical protein	#N/A	820	448	631	432	488	915	447	378	446	CDS	peg.856	868975	869130	156	-	hypothetical protein	#N/A	#N/A	#N/A	#N/A			306	256	775	591	714	426	493	431	100		5256.41	2871.79	4044.87	2769.23	3128.21	5865.38	2865.38	2423.08	2858.97
CDS	peg.833	Q7A_850	860851	861174	324	-	hypothetical protein	hypothetical protein; AFI83692.1	1689	1013	1675	1573	1371	2353	2394	2671	3012	CDS	peg.857	869303	869626	324	-	hypothetical protein	CDW43_RS04200	CDW43_RS04200	DUF2149 domain-containing protein	DUF2149 domain-containing protein			566	465	1774	1695	2107	1115	2045	1952	293		5212.96	3126.54	5169.75	4854.94	4231.48	7262.35	7388.89	8243.83	9296.3
CDS	peg.834	Q7A_851	861171	861689	519	-	hypothetical transporter PduT for various metalloporphyrins	biopolymer transporter ExbD; AFI83693.1	1169	683	1057	794	973	1648	1387	1507	1805	CDS	peg.858	869623	870141	519	-	hypothetical transporter PduT for various metalloporphyrins	CDW43_RS04205	CDW43_RS04205	MotA/TolQ/ExbB proton channel family protein	MotA/TolQ/ExbB proton channel family protein			422	337	1069	658	994	548	982	1083	248		2252.41	1315.99	2036.61	1529.87	1874.76	3175.34	2672.45	2903.66	3477.84
CDS	peg.835	Q7A_852	861691	865578	3888	-	CobN component of cobalt chelatase involved in B12 biosynthesis	cobaltochelatase subunit CobN; AFI83694.2	5334	3333	4707	4754	5950	8997	6993	7588	9420	CDS	peg.859	870143	874030	3888	-	CobN component of cobalt chelatase involved in B12 biosynthesis	CDW43_RS04210	CDW43_RS04210	cobaltochelatase subunit CobN	cobaltochelatase subunit CobN			2271	1622	4791	5990	6490	3186	3392	4135	2033		1371.91	857.253	1210.65	1222.74	1530.35	2314.04	1798.61	1951.65	2422.84
CDS	peg.836	Q7A_853	865633	867555	1923	-	TonB-dependent receptor Outer membrane receptor for ferrienterochelin and colicins	TonB-dependent receptor; AFI83695.2	3751	2134	3417	3464	6282	9406	5372	5162	6711	CDS	peg.860	874085	876007	1923	-	TonB-dependent receptor Outer membrane receptor for ferrienterochelin and colicins	CDW43_RS04215	CDW43_RS04215	TonB-dependent receptor	TonB-dependent receptor			1371	1138	3120	2727	3936	2181	3376	3346	17300		1950.6	1109.72	1776.91	1801.35	3266.77	4891.32	2793.55	2684.35	3489.86
CDS	peg.837	Q7A_854	868255	868878	624	-	putative exported protein	hypothetical protein; AFI83696.1	8400	5569	7829	10547	9101	13467	12865	15424	15771	CDS	peg.861	876707	877330	624	-	putative exported protein	CDW43_RS04220	CDW43_RS04220	DUF502 domain-containing protein	DUF502 domain-containing protein			3148	2515	7998	9932	11666	6011	5493	6994	1116		13461.5	8924.68	12546.5	16902.2	14584.9	21581.7	20617	24717.9	25274
CDS	peg.838	Q7A_855	868913	869377	465	-	NADH dehydrogenase (EC 1.6.99.3)	peroxiredoxin family protein; AFI83697.1	11454	8084	11452	16045	14075	18469	20889	24923	23944	CDS	peg.862	877365	877829	465	-	NADH dehydrogenase (EC 1.6.99.3)	CDW43_RS04225	CDW43_RS04225	DsrE/DsrF/DrsH-like family protein	DsrE/DsrF/DrsH-like family protein			3780	3504	11150	18160	19349	8979	5298	7422	1996		24632.3	17384.9	24628	34505.4	30268.8	39718.3	44922.6	53597.8	51492.5
CDS	peg.839	Q7A_856	869382	869615	234	-	Rhodanese-like domain protein	response regulator SirA; AFI83698.1	6417	4434	6303	8326	7338	10573	15783	17884	18356	CDS	peg.863	877834	878067	234	-	Rhodanese-like domain protein	CDW43_RS04230	CDW43_RS04230	sulfurtransferase TusA family protein	sulfurtransferase TusA family protein			2093	1709	5955	9970	10106	4561	4150	5943	1427		27423.1	18948.7	26935.9	35581.2	31359	45183.8	67448.7	76427.4	78444.4
CDS	peg.840	Q7A_857	869775	871160	1386	+	Exported zinc metalloprotease YfgC precursor	peptidase M48 Ste24p; AFI83699.2	11638	7702	10549	14496	13416	20747	16154	18759	22184	CDS	peg.864	878227	879612	1386	+	Exported zinc metalloprotease YfgC precursor	#N/A	CDW43_RS04235	#N/A	M48 family metalloprotease			4240	3413	12194	18981	22079	9710	8199	10429	2274		8396.83	5557	7611.11	10458.9	9679.65	14969	11655.1	13534.6	16005.8
CDS	peg.841	Q7A_858	871157	871645	489	+	Sulfur oxidation protein SoxY	transcriptional initiation protein Tat; AFI83700.1	7279	5200	7167	7499	6503	11658	5480	5858	6107	CDS	peg.865	879609	880097	489	+	Sulfur oxidation protein SoxY	CDW43_RS04240	CDW43_RS04240	transcriptional initiation protein Tat	transcriptional initiation protein Tat			2310	2066	8736	11989	13022	5897	3751	4115	778		14885.5	10633.9	14656.4	15335.4	13298.6	23840.5	11206.5	11979.6	12488.8
CDS	peg.842	Q7A_859	871645	871962	318	+	Sulfur oxidation protein SoxZ	thiosulfate oxidation carrier complex protein SoxZ; AFI83701.1	5794	4050	5378	5947	5549	8967	4626	5287	5547	CDS	peg.866	880097	880414	318	+	Sulfur oxidation protein SoxZ	CDW43_RS04245	CDW43_RS04245	thiosulfate oxidation carrier complex protein SoxZ	thiosulfate oxidation carrier complex protein SoxZ			2559	1908	6004	7955	9345	4283	2583	3267	546		18220.1	12735.8	16911.9	18701.3	17449.7	28198.1	14547.2	16625.8	17443.4
CDS	peg.843	Q7A_860	871959	873674	1716	+	Sensor histidine kinase	methanol utilization protein MoxY; AFI83702.1	16174	10990	15617	17086	14573	25800	17343	18682	21757	CDS	peg.867	880411	882126	1716	+	Sensor histidine kinase	CDW43_RS04250	CDW43_RS04250	histidine kinase	histidine kinase			6460	4871	17482	17835	23728	11832	10409	11756	1486		9425.41	6404.43	9100.82	9956.88	8492.42	15035	10106.6	10886.9	12678.9
CDS	peg.844	Q7A_861	873664	874308	645	+	DNA-binding response regulator, LuxR family	DNA-binding response regulator; AFI83703.1	9576	6070	8326	8547	7538	13184	7188	7706	8210	CDS	peg.868	882116	882760	645	+	DNA-binding response regulator, LuxR family	CDW43_RS04255	CDW43_RS04255	response regulator	response regulator			3930	2835	9308	8418	11239	5734	4746	5376	853		14846.5	9410.85	12908.5	13251.2	11686.8	20440.3	11144.2	11947.3	12728.7
CDS	peg.845	Q7A_862	874670	875860	1191	+	Sensor histidine kinase	two-component sensor histidine kinase; AFI83704.2	5746	4232	5741	6209	4654	9169	6839	6836	8179	CDS	peg.869	882951	884312	1362	+	Sensor histidine kinase	CDW43_RS04260	CDW43_RS04260	histidine kinase	histidine kinase			2175	1891	6797	4319	6151	3781	6312	6386	934		4824.52	3553.32	4820.32	5213.27	3907.64	7698.57	5742.23	5739.71	6867.34
CDS	peg.846	Q7A_863	875850	876494	645	+	BarA-associated response regulator UvrY (= GacA = SirA)	DNA-binding response regulator; AFI83705.1	4883	3274	4695	4131	3630	7085	4416	4097	5057	CDS	peg.870	884302	884946	645	+	BarA-associated response regulator UvrY (= GacA = SirA)	CDW43_RS04265	CDW43_RS04265	response regulator transcription factor	response regulator transcription factor			1567	1399	4396	2523	3730	2105	3065	3068	485		7570.54	5075.97	7279.07	6404.65	5627.91	10984.5	6846.51	6351.94	7840.31
CDS	peg.847	Q7A_864	876682	878460	1779	+	Methanol dehydrogenase large subunit protein (EC 1.1.99.8)	PQQ-dependent dehydrogenase%2C methanol/ethanol family; AFI83706.1	29296	15700	25053	21929	22959	33035	36736	37190	50841	CDS	peg.871	885134	886912	1779	+	Methanol dehydrogenase large subunit protein (EC 1.1.99.8)	CDW43_RS04270	CDW43_RS04270	methanol/ethanol family PQQ-dependent dehydrogenase	methanol/ethanol family PQQ-dependent dehydrogenase			17518	14133	31345	18048	29715	16131	16880	39180	8872		16467.7	8825.18	14082.6	12326.6	12905.6	18569.4	20649.8	20905	28578.4
CDS	peg.848	Q7A_865	878959	879873	915	+	Coenzyme PQQ synthesis protein B	pyrroloquinoline quinone biosynthesis protein B; AFI83707.1	10934	11290	11960	5648	6643	15763	2865	2796	2813	CDS	peg.872	887412	888326	915	+	Coenzyme PQQ synthesis protein B	CDW43_RS04280	CDW43_RS04280	pyrroloquinoline quinone biosynthesis protein PqqB	pyrroloquinoline quinone biosynthesis protein PqqB			3887	3512	14858	11789	19617	11293	2445	3197	988		11949.7	12338.8	13071	6172.68	7260.11	17227.3	3131.15	3055.74	3074.32
CDS	peg.849	Q7A_866	879896	880624	729	+	Pyrroloquinoline-quinone synthase (EC 1.3.3.11)	pyrroloquinoline quinone biosynthesis protein C; AFI83708.1	12086	10547	11170	5274	7053	15230	3014	3038	3220	CDS	peg.873	888349	889077	729	+	Pyrroloquinoline-quinone synthase (EC 1.3.3.11)	CDW43_RS04285	CDW43_RS04285	pyrroloquinoline-quinone synthase PqqC	pyrroloquinoline-quinone synthase PqqC			3429	3051	13731	13201	19398	9710	2264	2413	821		16578.9	14467.8	15322.4	7234.57	9674.9	20891.6	4134.43	4167.35	4417.01
CDS	peg.850	Q7A_867	880621	880905	285	+	Coenzyme PQQ synthesis protein D	pyrroloquinoline quinone biosynthesis protein PqqD; AFI83709.1	6391	5559	6057	3402	4303	9881	2187	2451	2538	CDS	peg.874	889074	889358	285	+	Coenzyme PQQ synthesis protein D	CDW43_RS04290	CDW43_RS04290	pyrroloquinoline quinone biosynthesis peptide chaperone PqqD	pyrroloquinoline quinone biosynthesis peptide chaperone PqqD			1994	1707	7162	7591	11178	5355	1432	1601	495		22424.6	19505.3	21252.6	11936.8	15098.2	34670.2	7673.68	8600	8905.26
CDS	peg.851	Q7A_868	880877	882070	1194	+	Coenzyme PQQ synthesis protein E	pyrroloquinoline quinone biosynthesis protein PqqE; AFI83710.1	18634	13855	15656	10381	13446	25348	7595	8221	8524	CDS	peg.875	889330	890523	1194	+	Coenzyme PQQ synthesis protein E	CDW43_RS04295	CDW43_RS04295	pyrroloquinoline quinone biosynthesis protein PqqE	pyrroloquinoline quinone biosynthesis protein PqqE			6977	5512	18792	19965	28811	13135	5677	6640	1871		15606.4	11603.9	13112.2	8694.3	11261.3	21229.5	6360.97	6885.26	7139.03
CDS	peg.852	Q7A_869	882060	882992	933	+	ABC transporter, ATP-binding protein	ABC transporter ATP-binding protein; AFI83711.1	12274	8065	10903	5922	6511	14385	2240	2070	2207	CDS	peg.876	890836	891774	939	+	ABC transporter, ATP-binding protein	CDW43_RS04300	CDW43_RS04300	ATP-binding cassette domain-containing protein	ATP-binding cassette domain-containing protein			2561	2020	6561	4678	7609	4186	3184	3396	580		13155.4	8644.16	11686	6347.27	6978.56	15418	2400.86	2218.65	2365.49
CDS	peg.853	Q7A_870	882989	883774	786	+	efflux ABC transporter, permease protein	ABC transporter; AFI83712.1	6538	4324	6440	3793	3515	8676	1161	1093	1272	CDS	peg.877	891771	892556	786	+	efflux ABC transporter, permease protein	CDW43_RS04305	CDW43_RS04305	ABC transporter permease	ABC transporter permease			1462	1233	4226	3067	4690	2669	1502	1521	307		8318.07	5501.27	8193.38	4825.7	4472.01	11038.2	1477.1	1390.59	1618.32
CDS	peg.854	Q7A_871	883804	884619	816	+	Protein-L-isoaspartate O-methyltransferase (EC 2.1.1.77)	protein-L-isoaspartate O-methyltransferase; AFI83713.1	11326	7219	10539	8068	7188	14591	4858	4314	4459	CDS	peg.878	892586	893401	816	+	Protein-L-isoaspartate O-methyltransferase (EC 2.1.1.77)	#N/A	CDW43_RS04310	#N/A	protein-L-isoaspartate O-methyltransferase			2989	2713	9325	5668	8489	4905	4435	4577	1118		13879.9	8846.81	12915.4	9887.25	8808.82	17881.1	5953.43	5286.76	5464.46
CDS	peg.855	Q7A_872	884635	884961	327	+	Rhodanese-related sulfurtransferase	sulfurtransferase; AFI83714.1	3544	2532	3460	2780	2535	4806	2184	2105	2202	CDS	peg.879	893417	893743	327	+	Rhodanese-related sulfurtransferase	CDW43_RS04315	CDW43_RS04315	rhodanese-like domain-containing protein	rhodanese-like domain-containing protein			1104	1054	3467	2146	3384	1767	2087	2157	514		10837.9	7743.12	10581	8501.53	7752.29	14697.2	6678.9	6437.31	6733.94
CDS	peg.856	Q7A_873	884971	886287	1317	+	Type I secretion outer membrane protein, TolC precursor	type I secretion protein TolC; AFI83715.1	30629	16644	25785	31913	29884	48079	58207	65090	71063	CDS	peg.880	893753	895069	1317	+	Type I secretion outer membrane protein, TolC precursor	CDW43_RS04320	CDW43_RS04320	TolC family outer membrane protein	TolC family outer membrane protein			9277	7125	26468	24592	33763	16330	25455	27047	7125		23256.6	12637.8	19578.6	24231.6	22691	36506.5	44196.7	49422.9	53958.2
CDS	peg.857	Q7A_874	886309	886860	552	+	Isochorismatase (EC 3.3.2.1)	hydrolase; AFI83716.1	12049	7415	11866	12440	9132	18084	9513	9369	11773	CDS	peg.881	895091	895642	552	+	Isochorismatase (EC 3.3.2.1)	CDW43_RS04325	CDW43_RS04325	hydrolase	hydrolase			3260	2905	12050	7187	11483	6954	7161	7092	1027		21827.9	13433	21496.4	22536.2	16543.5	32760.9	17233.7	16972.8	21327.9
CDS	peg.858	Q7A_876	887433	888944	1512	-	Mg-protoporphyrin IX monomethyl ester oxidative cyclase	B12-binding domain-containing radical SAM protein; AFI83718.1	10041	6101	9495	9045	7426	13801	10467	10756	13090	CDS	peg.883	896215	897726	1512	-	Mg-protoporphyrin IX monomethyl ester oxidative cyclase	CDW43_RS04335	CDW43_RS04335	B12-binding domain-containing radical SAM protein	B12-binding domain-containing radical SAM protein			3012	2724	8014	4893	7318	4225	9017	8341	947		6640.87	4035.05	6279.76	5982.14	4911.38	9127.65	6922.62	7113.76	8657.41
CDS	peg.859	Q7A_877	888981	890423	1443	-	Exodeoxyribonuclease I (EC 3.1.11.1)	exodeoxyribonuclease I; AFI83719.1	21035	12750	19723	30074	24782	36771	37345	43261	47487	CDS	peg.884	897763	899205	1443	-	Exodeoxyribonuclease I (EC 3.1.11.1)	CDW43_RS04340	CDW43_RS04340	exodeoxyribonuclease I	exodeoxyribonuclease I			6997	5742	19657	15239	22541	12044	11291	13584	2272		14577.3	8835.76	13668.1	20841.3	17173.9	25482.3	25880.1	29979.9	32908.5
CDS	peg.860	Q7A_878	890424	891710	1287	-	Glutamate-1-semialdehyde aminotransferase (EC 5.4.3.8)	aspartate aminotransferase family protein; AFI83720.1	25171	16081	23898	38103	30701	43401	41243	43433	46475	CDS	peg.885	899206	900492	1287	-	Glutamate-1-semialdehyde aminotransferase (EC 5.4.3.8)	CDW43_RS04345	CDW43_RS04345	glutamate-1-semialdehyde 2,1-aminomutase	glutamate-1-semialdehyde 2,1-aminomutase			8715	7550	22881	25510	33496	16689	10714	13180	3144		19557.9	12494.9	18568.8	29606.1	23854.7	33722.6	32045.8	33747.5	36111.1
CDS	peg.861	Q7A_879	891857	893194	1338	+	Sensor histidine kinase	histidine kinase; AFI83721.1	12312	7127	11307	17074	14621	20313	24407	25272	26651	CDS	peg.886	900639	901976	1338	+	Sensor histidine kinase	CDW43_RS04350	CDW43_RS04350	histidine kinase	histidine kinase			4120	3425	11668	12648	16108	7685	9761	10069	1808		9201.79	5326.61	8450.67	12760.8	10927.5	15181.6	18241.4	18887.9	19918.5
CDS	peg.862	Q7A_880	893191	893826	636	+	Two-component response regulator	DNA-binding response regulator; AFI83722.1	11897	7694	11300	15496	12111	19036	12797	13392	14036	CDS	peg.887	901973	902608	636	+	Two-component response regulator	CDW43_RS04355	CDW43_RS04355	response regulator transcription factor	response regulator transcription factor			4014	3415	11482	10473	14262	7537	5953	6960	1505		18706	12097.5	17767.3	24364.8	19042.5	29930.8	20121.1	21056.6	22069.2
CDS	peg.863	Q7A_881	894160	894927	768	+	TonB system biopolymer transport component Chromosome segregation ATPase	DUF3450 domain-containing protein; AFI83723.1	13940	9694	14273	12661	10253	20101	11318	10552	11542	CDS	peg.888	902942	903709	768	+	TonB system biopolymer transport component Chromosome segregation ATPase	CDW43_RS04360	CDW43_RS04360	DUF3450 domain-containing protein	DUF3450 domain-containing protein			3926	3844	13855	7677	13053	7294	10827	8761	3541		18151	12622.4	18584.6	16485.7	13350.3	26173.2	14737	13739.6	15028.6
CDS	peg.864	Q7A_882	894924	896285	1362	+	MotA/TolQ/ExbB proton channel family protein	flagellar motor protein MotA; AFI83724.1	30038	20300	29268	29123	23122	41460	23557	23701	24669	CDS	peg.889	903706	905067	1362	+	MotA/TolQ/ExbB proton channel family protein	CDW43_RS04365	CDW43_RS04365	MotA/TolQ/ExbB proton channel family protein	MotA/TolQ/ExbB proton channel family protein			10077	9249	27299	14128	25447	14252	17382	14248	4132		22054.3	14904.6	21489	21382.5	16976.5	30440.5	17295.9	17401.6	18112.3
CDS	peg.865	Q7A_883	896308	896790	483	+	Ferric siderophore transport system, biopolymer transport protein ExbB	biopolymer transporter ExbB; AFI83725.1	10490	6225	9823	9517	7906	13983	7852	7450	8139	CDS	peg.890	905090	905572	483	+	Ferric siderophore transport system, biopolymer transport protein ExbB	#N/A	CDW43_RS04370	#N/A	MotA/TolQ/ExbB proton channel family protein			3432	2838	7830	3990	7286	4037	5600	4649	828		21718.4	12888.2	20337.5	19703.9	16368.5	28950.3	16256.7	15424.4	16850.9
CDS	peg.866	Q7A_884	896799	897206	408	+	Biopolymer transport protein ExbD/TolR	biopolymer transporter ExbD; AFI83726.1	10382	6038	9466	9766	7517	13879	8407	7952	8140	CDS	peg.891	905581	905988	408	+	Biopolymer transport protein ExbD/TolR	CDW43_RS04375	CDW43_RS04375	biopolymer transporter ExbD	biopolymer transporter ExbD			2849	2423	8721	4301	8237	4638	4763	4136	647		25446.1	14799	23201	23936.3	18424	34017.2	20605.4	19490.2	19951
CDS	peg.867	Q7A_885	897226	897885	660	+	Ferric siderophore transport system, periplasmic binding protein TonB	energy transducer TonB; AFI83727.1	10891	6293	9941	9749	8345	15013	12760	12039	12533	CDS	peg.892	906008	906667	660	+	Ferric siderophore transport system, periplasmic binding protein TonB	#N/A	CDW43_RS04380	#N/A	TonB family protein			3130	2740	8283	3921	7502	3992	7444	6334	907		16501.5	9534.85	15062.1	14771.2	12643.9	22747	19333.3	18240.9	18989.4
CDS	peg.868	Q7A_886	897888	899111	1224	+	TPR domain protein, putative component of TonB system	hypothetical protein; AFI83728.1	31034	19604	31616	32137	23624	44756	20783	19321	19416	CDS	peg.893	906700	907893	1194	+	TPR domain protein, putative component of TonB system	#N/A	CDW43_RS04385	#N/A	tetratricopeptide repeat protein			8540	7799	27088	10531	20699	13469	11784	10097	1511		25354.6	16016.3	25830.1	26255.7	19300.7	36565.4	16979.6	15785.1	15862.7
CDS	peg.869	Q7A_887	899104	899670	567	+	Ribulose-5-phosphate 4-epimerase and related epimerases and aldolases	class II aldolase; AFI83729.1	9829	5323	9166	9131	7048	13177	5570	4687	5068	CDS	peg.894	907886	908452	567	+	Ribulose-5-phosphate 4-epimerase and related epimerases and aldolases	CDW43_RS04390	CDW43_RS04390	class II aldolase/adducin family protein	class II aldolase/adducin family protein			2901	2392	6710	2924	5771	3546	3780	3144	407		17335.1	9388.01	16165.8	16104.1	12430.3	23239.9	9823.63	8266.31	8938.27
CDS	peg.870	Q7A_888	900014	902161	2148	+	Glutamate synthase [NADPH] large chain (EC 1.4.1.13)	SAM-dependent methyltransferase; AFI83730.1	35747	27245	33638	34174	29088	52929	20324	20246	22787	CDS	peg.895	908796	910943	2148	+	Glutamate synthase [NADPH] large chain (EC 1.4.1.13)	CDW43_RS04395	CDW43_RS04395	5-histidylcysteine sulfoxide synthase	5-histidylcysteine sulfoxide synthase			11132	9609	41869	37828	52084	28396	11632	12888	2336		16642	12683.9	15660.1	15909.7	13541.9	24641.1	9461.82	9425.51	10608.5
CDS	peg.871	Q7A_889	902148	903320	1173	+	Aspartate aminotransferase (EC 2.6.1.1)	aminotransferase; AFI83731.1	13325	9046	12697	12182	10458	19829	6845	6384	7080	CDS	peg.896	910930	912102	1173	+	Aspartate aminotransferase (EC 2.6.1.1)	CDW43_RS04400	CDW43_RS04400	PatB family C-S lyase	PatB family C-S lyase			4593	3772	13062	10949	16104	8567	5063	5288	958		11359.8	7711.85	10824.4	10385.3	8915.6	16904.5	5835.46	5442.46	6035.81
CDS	peg.872	Q7A_890	903412	903615	204	+	hypothetical protein	hypothetical protein; AFI83732.1	6027	3776	4873	4826	4886	9008	4146	4115	3967	CDS	peg.897	912194	912397	204	+	hypothetical protein	CDW43_RS04405	CDW43_RS04405	winged helix-turn-helix domain-containing protein	winged helix-turn-helix domain-containing protein			2095	1733	5820	7056	8754	4015	2995	3392	836		29544.1	18509.8	23887.3	23656.9	23951	44156.9	20323.5	20171.6	19446.1
CDS	peg.873	Q7A_891	903612	904184	573	-	Cytochrome c family protein	hypothetical protein; AFI83733.1	10058	6516	8914	10210	8845	15550	8190	8283	7848	CDS	peg.898	912394	912966	573	-	Cytochrome c family protein	CDW43_RS04410	CDW43_RS04410	DUF3365 domain-containing protein	DUF3365 domain-containing protein			3433	2888	9308	12220	14756	7128	5929	6660	2194		17553.2	11371.7	15556.7	17818.5	15436.3	27137.9	14293.2	14455.5	13696.3
CDS	peg.874	Q7A_892	904493	906391	1899	+	Topoisomerase IV subunit B (EC 5.99.1.-)	DNA topoisomerase IV subunit B; AFI83734.1	32252	18275	29179	20268	18682	38219	11802	10693	10652	CDS	peg.900	913275	915173	1899	+	Topoisomerase IV subunit B (EC 5.99.1.-)	CDW43_RS04415	CDW43_RS04415	DNA topoisomerase IV subunit B	DNA topoisomerase IV subunit B			11658	9353	21416	9903	18041	10379	9164	8976	2078		16983.7	9623.49	15365.5	10673	9837.81	20125.9	6214.85	5630.86	5609.27
CDS	peg.875	Q7A_893	906406	908646	2241	+	Topoisomerase IV subunit A (EC 5.99.1.-)	DNA topoisomerase IV subunit A; AFI83735.2	39150	23297	36354	25500	23351	48150	13390	12237	12142	CDS	peg.901	915188	917428	2241	+	Topoisomerase IV subunit A (EC 5.99.1.-)	CDW43_RS04420	CDW43_RS04420	DNA topoisomerase IV subunit A	DNA topoisomerase IV subunit A			12442	10462	29762	13016	24127	14444	8935	7939	1904		17469.9	10395.8	16222.2	11378.8	10419.9	21485.9	5975.01	5460.51	5418.12
CDS	peg.876	Q7A_894	908700	909161	462	+	hypothetical protein	hypothetical protein; AFI83736.1	7207	3720	6683	5962	4192	8470	5113	5266	5293	CDS	peg.902	917482	917943	462	+	hypothetical protein	CDW43_RS04425	CDW43_RS04425	DUF3305 domain-containing protein	DUF3305 domain-containing protein			1959	1542	5699	3723	5531	3368	3489	3552	593		15599.6	8051.95	14465.4	12904.8	9073.59	18333.3	11067.1	11398.3	11456.7
CDS	peg.877	#N/A	909161	909622	462	+	hypothetical protein	#N/A	5291	2759	4869	4533	3225	6731	5563	5872	6034	CDS	peg.903	917943	918404	462	+	hypothetical protein	#N/A	CDW43_RS04430	#N/A	DUF3306 domain-containing protein			1284	1059	4457	3433	4686	2539	4216	4235	501		11452.4	5971.86	10539	9811.69	6980.52	14569.3	12041.1	12710	13060.6
CDS	peg.878	Q7A_896	909615	911159	1545	+	Iron-sulfur cluster-binding protein	4Fe-4S ferredoxin; AFI83738.1	11736	6883	11549	12732	8649	16418	9378	9500	9747	CDS	peg.904	918397	919941	1545	+	Iron-sulfur cluster-binding protein	#N/A	CDW43_RS04435	#N/A	4Fe-4S binding protein			3221	2739	9094	7149	10671	5919	6379	6398	729		7596.12	4455.02	7475.08	8240.78	5598.06	10626.5	6069.9	6148.87	6308.74
CDS	peg.879	Q7A_897	911165	911740	576	+	Putative formate dehydrogenase-specific chaperone	molecular chaperone TorD; AFI83739.1	4902	2912	4283	4965	3765	6158	4065	4201	3823	CDS	peg.905	919947	920522	576	+	Putative formate dehydrogenase-specific chaperone	CDW43_RS04440	CDW43_RS04440	molecular chaperone TorD family protein	molecular chaperone TorD family protein			1544	1215	3717	3397	4822	2716	2979	3072	362		8510.42	5055.56	7435.76	8619.79	6536.46	10691	7057.29	7293.4	6637.15
CDS	peg.880	#N/A	911948	912082	135	+	hypothetical protein	#N/A	12690	9572	12465	18791	17007	23549	7973	8854	8841	CDS	peg.906	920730	920864	135	+	hypothetical protein	#N/A	CDW43_RS04445	#N/A	hypothetical protein			5724	4645	13270	15795	19091	8952	3994	5154	1038		94000	70903.7	92333.3	139193	125978	174437	59059.3	65585.2	65488.9
CDS	peg.881	Q7A_898	912095	914968	2874	+	Formate dehydrogenase-O, major subunit (EC 1.2.1.2)	formate dehydrogenase; AFI83740.1	111818	77693	103219	133766	116666	185229	62690	69543	62476	CDS	peg.907	920877	923750	2874	+	Formate dehydrogenase-O, major subunit (EC 1.2.1.2)	CDW43_RS04450	CDW43_RS04450	formate dehydrogenase subunit alpha	formate dehydrogenase subunit alpha			40542	34536	114000	120758	151453	74142	35912	44230	7878		38906.8	27033.1	35914.8	46543.5	40593.6	64449.9	21812.8	24197.3	21738.3
CDS	peg.882	Q7A_899	914985	915569	585	+	Formate dehydrogenase-O, iron-sulfur subunit (EC 1.2.1.2) Putative formate dehydrogenase iron-sulfur subunit (EC 1.2.1.2)	formate dehydrogenase; AFI83741.1	24853	15111	21625	26245	23395	37883	9899	10658	9014	CDS	peg.908	923767	924351	585	+	Formate dehydrogenase-O, iron-sulfur subunit (EC 1.2.1.2) Putative formate dehydrogenase iron-sulfur subunit (EC 1.2.1.2)	CDW43_RS04455	CDW43_RS04455	formate dehydrogenase FDH3 subunit beta	formate dehydrogenase FDH3 subunit beta			7794	6774	26182	28418	35228	16920	8406	8407	1115		42483.8	25830.8	36965.8	44863.2	39991.5	64757.3	16921.4	18218.8	15408.5
CDS	peg.883	Q7A_900	915572	915751	180	+	hypothetical protein	hypothetical protein; AFI83742.1	8097	4612	6702	9003	7671	12550	4174	4531	4112	CDS	peg.909	924354	924533	180	+	hypothetical protein	CDW43_RS04460	CDW43_RS04460	hypothetical protein	hypothetical protein			2627	2192	8723	8746	11810	6028	2616	2769	377		44983.3	25622.2	37233.3	50016.7	42616.7	69722.2	23188.9	25172.2	22844.4
CDS	peg.884	Q7A_901	915762	916769	1008	+	Formate dehydrogenase O gamma subunit (EC 1.2.1.2)	formate dehydrogenase subunit gamma; AFI83743.1	16738	9978	15062	20676	17162	29681	10765	12426	10907	CDS	peg.910	924544	925551	1008	+	Formate dehydrogenase O gamma subunit (EC 1.2.1.2)	CDW43_RS04465	CDW43_RS04465	formate dehydrogenase subunit gamma	formate dehydrogenase subunit gamma			5800	4761	18435	16726	23412	11337	8362	8664	1019		16605.2	9898.81	14942.5	20511.9	17025.8	29445.4	10679.6	12327.4	10820.4
CDS	peg.886	Q7A_902	917093	918790	1698	+	tungsten-containing formate dehydrogenase beta subunit	NADH-quinone oxidoreductase subunit F; AFI83744.1	71752	44458	68755	62211	50808	100279	33624	27166	27532	CDS	peg.911	925876	927573	1698	+	tungsten-containing formate dehydrogenase beta subunit	CDW43_RS04470	CDW43_RS04470	NAD(P)H-dependent oxidoreductase subunit E	NAD(P)H-dependent oxidoreductase subunit E			21686	19355	66104	30391	56117	33436	26778	24472	5525		42256.8	26182.6	40491.8	36637.8	29922.3	59057.1	19802.1	15998.8	16214.4
CDS	peg.887	Q7A_903	918790	921591	2802	+	tungsten-containing formate dehydrogenase alpha subunit	formate dehydrogenase subunit alpha; AFI83745.1	145248	83720	130241	129080	114073	197587	86787	66285	64514	CDS	peg.912	927573	930374	2802	+	tungsten-containing formate dehydrogenase alpha subunit	CDW43_RS04475	CDW43_RS04475	formate dehydrogenase subunit alpha	formate dehydrogenase subunit alpha			46745	40718	121574	70041	110461	63784	46480	42355	8662		51837.3	29878.7	46481.4	46067.1	40711.3	70516.4	30973.2	23656.3	23024.3
CDS	peg.888	Q7A_904	921788	922507	720	+	5-nucleotidase SurE (EC 3.1.3.5)	5'/3'-nucleotidase SurE; AFI83746.2	17103	10575	16081	9928	10637	20488	9775	8706	9058	CDS	peg.913	930538	931290	753	+	5-nucleotidase SurE (EC 3.1.3.5)	CDW43_RS04480	CDW43_RS04480	5'/3'-nucleotidase SurE	5'/3'-nucleotidase SurE			7436	5905	13536	6107	9851	5677	9140	8110	2419		23754.2	14687.5	22334.7	13788.9	14773.6	28455.6	13576.4	12091.7	12580.6
CDS	peg.889	Q7A_905	922504	923166	663	+	Protein-L-isoaspartate O-methyltransferase (EC 2.1.1.77)	protein-L-isoaspartate O-methyltransferase; AFI83747.1	13606	8379	12383	9747	9674	17617	6380	5999	6395	CDS	peg.914	931287	931949	663	+	Protein-L-isoaspartate O-methyltransferase (EC 2.1.1.77)	CDW43_RS04485	CDW43_RS04485	protein-L-isoaspartate(D-aspartate) O-methyltransferase	protein-L-isoaspartate(D-aspartate) O-methyltransferase			5734	4488	10227	4913	8652	5159	5773	5205	1272		20521.9	12638	18677.2	14701.4	14591.3	26571.6	9622.93	9048.27	9645.55
CDS	peg.890	Q7A_906	923163	923738	576	+	FIG139438: lipoprotein B	DedA family protein; AFI83748.1	17233	10479	15297	13587	12504	22441	6920	6241	6614	CDS	peg.915	931946	932521	576	+	FIG139438: lipoprotein B	CDW43_RS04490	CDW43_RS04490	DedA family protein	DedA family protein			7489	5314	13650	7210	11966	7188	4859	4711	890		29918.4	18192.7	26557.3	23588.5	21708.3	38960.1	12013.9	10835.1	11482.6
CDS	peg.891		924143	924571	429	+	Lipoprotein NlpD		4209	2519	3823	2665	2513	5288	1123	904	939	CDS	peg.916	932539	933354	816	+	Lipoprotein NlpD	#N/A	CDW43_RS04495	#N/A	peptidoglycan DD-metalloendopeptidase family protein			4702	3508	10428	4940	8360	5243	3997	3791	549		9811.19	5871.79	8911.42	6212.12	5857.81	12326.3	2617.72	2107.23	2188.81
CDS	peg.892	Q7A_909	924681	925736	1056	+	Peptide chain release factor 2 programmed frameshift-containing	peptide chain release factor 2; AFI83751.2	15492	9637	15790	13892	11000	22116	12836	10425	11055	CDS	peg.917	933464	934519	1056	+	Peptide chain release factor 2 programmed frameshift-containing	#N/A	CDW43_RS04500	#N/A	peptide chain release factor 2			5652	4976	13457	7493	12454	7308	11935	10932	2158		14670.5	9125.95	14952.7	13155.3	10416.7	20943.2	12155.3	9872.16	10468.8
CDS	peg.893	Q7A_910	925748	927247	1500	+	Lysyl-tRNA synthetase (class II) (EC 6.1.1.6)	lysine--tRNA ligase; AFI83752.1	24612	17441	26520	24349	16596	34844	14463	11417	11991	CDS	peg.918	934531	936030	1500	+	Lysyl-tRNA synthetase (class II) (EC 6.1.1.6)	CDW43_RS04505	CDW43_RS04505	lysine--tRNA ligase	lysine--tRNA ligase			7914	7953	24577	12938	21452	13330	12648	9991	1608		16408	11627.3	17680	16232.7	11064	23229.3	9642	7611.33	7994
CDS	peg.894	Q7A_911	927257	928222	966	-	Integron integrase IntI4	integron integrase; AFI83753.1	7597	4870	8145	7660	5520	10836	6222	5777	7235	CDS	peg.919	936040	937006	967	-	Integron integrase IntI4	CDW43_RS16650	CDW43_RS16655	tyrosine-type recombinase/integrase	phage integrase N-terminal SAM-like domain-containing protein			6811	5405	18038	16137	21248	11578	10339	9785	2172		7864.39	5041.41	8431.68	7929.61	5714.29	11217.4	6440.99	5980.33	7489.65
CDS	peg.897	Q7A_914	930010	930555	546	+	unknown	hypothetical protein; AFI83756.1	6284	4703	7115	4639	3785	8040	2684	2715	2929	CDS	peg.920	937005	937841	837	+	hypothetical protein	#N/A	CDW43_RS04515	#N/A	hypothetical protein			8927	8005	30814	42906	48854	23658	11608	10489	3815		11509.2	8613.55	13031.1	8496.34	6932.23	14725.3	4915.75	4972.53	5364.47
CDS	peg.898	Q7A_915	930666	931238	573	+	hypothetical protein	hypothetical protein; AFI83757.1	6720	5279	7818	4704	3238	7769	1574	1593	1429	CDS	peg.926	943548	944300	753	+	hypothetical protein	CDW43_RS04555	CDW43_RS04555	hypothetical protein	hypothetical protein			1501	1370	5038	8128	7766	3795	4495	4719	965		11727.7	9212.91	13644	8209.42	5650.96	13558.5	2746.95	2780.1	2493.89
CDS	peg.899	#N/A	932330	933082	753	+	hypothetical protein	#N/A	4774	3291	4587	4453	3908	6984	3922	4532	5370	CDS	peg.927	944533	944685	153	+	hypothetical protein	CDW43_RS16250	CDW43_RS16250	hypothetical protein	hypothetical protein			682	589	1477	1687	2147	1023	1047	1158	140		6339.97	4370.52	6091.63	5913.68	5189.91	9274.9	5208.5	6018.59	7131.47
CDS	peg.900	Q7A_917	933315	933467	153	+	hypothetical protein	hypothetical protein; AFI83759.1	1827	1036	1451	1716	1584	2361	1301	1462	1687	CDS	peg.928	944808	945719	912	+	Leucyl-tRNA synthetase	CDW43_RS04560	CDW43_RS04560	hypothetical protein	hypothetical protein			1377	1167	4069	3514	4772	2386	3959	4135	680		11941.2	6771.24	9483.66	11215.7	10352.9	15431.4	8503.27	9555.56	11026.1
CDS	peg.896	Q7A_913	933590	934501	912	+	Leucyl-tRNA synthetase	hypothetical protein; AFI83755.1	4486	2591	3797	4818	4396	6786	7739	8856	9658	CDS	peg.929	945695	946348	654	+	unknown	#N/A	CDW43_RS04565	#N/A	hypothetical protein			535	395	1753	1121	1856	920	744	750	103		4918.86	2841.01	4163.38	5282.89	4820.18	7440.79	8485.75	9710.53	10589.9
CDS	peg.901	Q7A_918	934642	934875	234	+	RelB/StbD replicon stabilization protein (antitoxin to RelE/StbE)	CopG family transcriptional regulator; AFI83760.1	1946	1183	1546	2034	2262	3279	3768	3402	4029	CDS	peg.931	947053	947286	234	+	RelB/StbD replicon stabilization protein (antitoxin to RelE/StbE)	CDW43_RS04575	CDW43_RS04575	hypothetical protein	hypothetical protein			829	625	1677	1813	2233	1051	1738	1724	474		8316.24	5055.56	6606.84	8692.31	9666.67	14012.8	16102.6	14538.5	17217.9
CDS	peg.902	Q7A_03380	935165	935380	216	+	hypothetical protein	hypothetical protein; ASF49088.1	1730	1072	1691	1983	2003	3245	1353	892	1294	CDS	peg.932	947576	947791	216	+	hypothetical protein	CDW43_RS04585	CDW43_RS04585	TIGR02450 family Trp-rich protein	TIGR02450 family Trp-rich protein			441	477	1866	1568	1846	987	555	614	132		8009.26	4962.96	7828.7	9180.56	9273.15	15023.1	6263.89	4129.63	5990.74
CDS	peg.903	Q7A_919	935445	935783	339	+	Thioredoxin related protein	thiol reductase thioredoxin; AFI83761.1	1302	665	1107	1328	1324	2094	1485	1159	1763	CDS	peg.933	947856	948194	339	+	Thioredoxin related protein	CDW43_RS04590	CDW43_RS04590	thioredoxin family protein	thioredoxin family protein			512	426	1219	881	1247	537	441	693	124		3840.71	1961.65	3265.49	3917.4	3905.6	6176.99	4380.53	3418.88	5200.59
CDS	peg.904	#N/A	936105	936230	126	+	hypothetical protein	#N/A	2744	1494	2318	4607	3851	5040	9193	9882	14040	CDS	peg.934	948516	948641	126	+	hypothetical protein	#N/A	CDW43_RS04595	#N/A	type II toxin-antitoxin system RelE/ParE family toxin			1403	1306	3038	4907	5427	2270	2710	3515	903		21777.8	11857.1	18396.8	36563.5	30563.5	40000	72960.3	78428.6	111429
CDS	peg.905	Q7A_921	936223	936510	288	+	DNA-binding protein	transcriptional regulator; AFI83763.1	5907	3343	5454	10122	7638	10474	16472	18186	24582	CDS	peg.935	948634	948921	288	+	DNA-binding protein	#N/A	CDW43_RS04600	#N/A	helix-turn-helix domain-containing protein			3248	2883	7398	10371	12573	5816	5141	7053	1568		20510.4	11607.6	18937.5	35145.8	26520.8	36368.1	57194.4	63145.8	85354.2
CDS	peg.906	Q7A_922	936552	937397	846	-	DNA ligase (ATP) (EC 6.5.1.1)	ATP-dependent DNA ligase; AFI83764.1	3940	2386	3839	4891	3645	5845	9744	9600	14813	CDS	peg.936	948963	949808	846	-	DNA ligase (ATP) (EC 6.5.1.1)	CDW43_RS04605	CDW43_RS04605	DNA ligase	DNA ligase			2069	1805	4490	4723	5857	3252	4385	5234	1037		4657.21	2820.33	4537.83	5781.32	4308.51	6908.98	11517.7	11347.5	17509.5
CDS	peg.907	Q7A_923	937800	938138	339	+	Thioredoxin related protein	thiol reductase thioredoxin; AFI83765.1	824	673	837	980	985	1651	980	899	1346	CDS	peg.937	950211	950549	339	+	Thioredoxin related protein	CDW43_RS04610	CDW43_RS04610	thioredoxin family protein	thioredoxin family protein			374	401	842	1054	1253	571	623	768	308		2430.68	1985.25	2469.03	2890.86	2905.6	4870.21	2890.86	2651.92	3970.5
CDS	peg.908	Q7A_924	938200	938454	255	-	YoeB toxin protein	Txe/YoeB family addiction module toxin; AFI83766.1	1385	1050	1456	1569	1692	2723	2293	2339	2859	CDS	peg.938	950611	950865	255	-	YoeB toxin protein	CDW43_RS04615	CDW43_RS04615	Txe/YoeB family addiction module toxin	Txe/YoeB family addiction module toxin			800	755	1784	2363	2592	1166	1734	2052	1557		5431.37	4117.65	5709.8	6152.94	6635.29	10678.4	8992.16	9172.55	11211.8
CDS	peg.909	Q7A_925	938451	938654	204	-	YefM protein (antitoxin to YoeB)	prevent-host-death family protein; AFI83767.1	958	875	1222	1102	1255	2046	1644	1560	2078	CDS	peg.939	950862	951113	252	-	YefM protein (antitoxin to YoeB)	CDW43_RS04620	CDW43_RS04620	type II toxin-antitoxin system prevent-host-death family antitoxin	type II toxin-antitoxin system prevent-host-death family antitoxin			499	562	1503	2071	2268	1066	1248	1438	1241		4696.08	4289.22	5990.2	5401.96	6151.96	10029.4	8058.82	7647.06	10186.3
CDS	peg.910	Q7A_926	939110	940957	1848	+	hypothetical protein	transglycosylase; AFI83768.1	10903	6767	9921	10934	9877	15452	8006	8505	10299	CDS	peg.940	951521	953368	1848	+	hypothetical protein	CDW43_RS04625	CDW43_RS04625	lytic transglycosylase domain-containing protein	lytic transglycosylase domain-containing protein			4813	4070	9801	9640	11974	6337	5172	5988	1467		5899.89	3661.8	5368.51	5916.67	5344.7	8361.47	4332.25	4602.27	5573.05
CDS	peg.911	Q7A_927	941199	942329	1131	-	Uncharacterized iron-regulated membrane protein Iron-uptake factor PiuB	hypothetical protein; AFI83769.1	1903	955	1782	1364	1175	2328	1313	1280	1671	CDS	peg.941	953610	954740	1131	-	Uncharacterized iron-regulated membrane protein Iron-uptake factor PiuB	CDW43_RS04630	CDW43_RS04630	PepSY domain-containing protein	PepSY domain-containing protein			689	564	1684	1194	1611	847	1041	1200	251		1682.58	844.385	1575.6	1206.01	1038.9	2058.36	1160.92	1131.74	1477.45
CDS	peg.912	Q7A_928	942329	944401	2073	-	Outer membrane receptor proteins, mostly Fe transport	TonB-dependent receptor; AFI83770.1	1960	1181	1915	1555	1423	2784	1747	1748	2161	CDS	peg.942	954740	956812	2073	-	Outer membrane receptor proteins, mostly Fe transport	CDW43_RS04635	CDW43_RS04635	TonB-dependent receptor	TonB-dependent receptor			645	441	1658	1288	1591	927	1450	1574	606		945.49	569.706	923.782	750.121	686.445	1342.98	842.74	843.222	1042.45
CDS	peg.913	Q7A_929	944568	945443	876	+	Transcriptional regulator, AraC family	AraC family transcriptional regulator; AFI83771.1	1417	1064	1520	882	1417	2045	506	457	567	CDS	peg.943	956979	957854	876	+	Transcriptional regulator, AraC family	CDW43_RS04640	CDW43_RS04640	helix-turn-helix domain-containing protein	helix-turn-helix domain-containing protein			512	379	880	763	966	572	375	444	1145		1617.58	1214.61	1735.16	1006.85	1617.58	2334.47	577.626	521.689	647.26
CDS	peg.914	#N/A	945622	946164	543	+	Mobile element protein	#N/A	4658	2733	4032	3290	4579	6437	1610	1850	1840	CDS	peg.944	958033	958575	543	+	Mobile element protein	CDW43_RS04645	#N/A	IS5 family transposase	#N/A			2516	1671	3660	4587	5343	2367	1207	1462	887		8578.27	5033.15	7425.41	6058.93	8432.78	11854.5	2965.01	3407	3388.58
CDS	peg.915	#N/A	946161	946454	294	+	Mobile element protein	#N/A	2040	1189	1864	1831	2189	3168	1068	1211	1613	CDS	peg.945	958572	958865	294	+	Mobile element protein	#N/A	CDW43_RS04645	#N/A	IS5 family transposase			870	672	1789	1648	2076	1097	711	783	302		6938.78	4044.22	6340.14	6227.89	7445.58	10775.5	3632.65	4119.05	5486.39
CDS	peg.916	#N/A	946830	946973	144	+	hypothetical protein	#N/A	1517	1180	1795	1349	1269	2375	621	673	749	CDS	peg.946	959265	959384	120	+	hypothetical protein	#N/A	CDW43_RS04650	#N/A	GFA family protein			550	483	1845	1415	1963	1180	782	801	301		10534.7	8194.44	12465.3	9368.06	8812.5	16493.1	4312.5	4673.61	5201.39
CDS	peg.917	Q7A_933	947073	947624	552	+	hypothetical protein	hypothetical protein; AFI83775.1	3132	2173	3476	2624	2281	4683	1518	1650	1604	CDS	peg.947	959484	960035	552	+	hypothetical protein	CDW43_RS04655	CDW43_RS04655	hypothetical protein	hypothetical protein			1066	963	4117	2629	4126	2431	1937	1948	560		5673.91	3936.59	6297.1	4753.62	4132.25	8483.7	2750	2989.13	2905.8
CDS	peg.918	Q7A_934	947651	948295	645	+	SAM-dependent methyltransferase	SAM-dependent methyltransferase; AFI83776.1	3824	2417	3579	3359	2828	5494	1552	1576	1697	CDS	peg.948	960062	960706	645	+	SAM-dependent methyltransferase	CDW43_RS04660	CDW43_RS04660	class I SAM-dependent methyltransferase	class I SAM-dependent methyltransferase			1443	1201	3345	2634	3752	2191	1368	1504	427		5928.68	3747.29	5548.84	5207.75	4384.5	8517.83	2406.2	2443.41	2631.01
CDS	peg.919	Q7A_935	948499	948684	186	+	Prevent host death protein, Phd antitoxin # A	transcriptional regulator; AFI83777.1	2785	1452	2191	2993	2796	4449	2945	2842	4345	CDS	peg.949	960823	961095	273	+	Prevent host death protein, Phd antitoxin # A	CDW43_RS04665	CDW43_RS04665	ribbon-helix-helix protein, CopG family	ribbon-helix-helix protein, CopG family			1256	1026	2594	2997	3682	1779	1299	1582	628		14973.1	7806.45	11779.6	16091.4	15032.3	23919.4	15833.3	15279.6	23360.2
CDS	peg.920	Q7A_936	948726	948962	237	+	Death on curing protein, Doc toxin	RelE/ParE family toxin; AFI83778.2	3806	2464	3647	5015	4007	6602	4204	3951	5671	CDS	peg.950	961137	961373	237	+	Death on curing protein, Doc toxin	#N/A	CDW43_RS04670	#N/A	type II toxin-antitoxin system RelE/ParE family toxin			1410	1337	3809	4125	5027	2659	2527	2711	778		16059.1	10396.6	15388.2	21160.3	16907.2	27856.5	17738.4	16670.9	23928.3
CDS	peg.921	#N/A	948995	949108	114	-	hypothetical protein	#N/A	2273	1697	2609	2831	2163	3979	2540	2431	3288	CDS	peg.951	961406	961540	135	-	hypothetical protein	#N/A	#N/A	#N/A	#N/A			755	743	2529	2217	2765	1562	2493	2372	494		19938.6	14886	22886	24833.3	18973.7	34903.5	22280.7	21324.6	28842.1
CDS	peg.922	Q7A_938	949291	949578	288	-	hypothetical protein	hypothetical protein; AFI83780.1	5243	3376	5300	3201	2424	5283	3374	3173	4256	CDS	peg.952	961702	961989	288	-	hypothetical protein	CDW43_RS04680	CDW43_RS04680	DUF3144 domain-containing protein	DUF3144 domain-containing protein			1457	1335	5763	3154	4739	3008	4374	3950	758		18204.9	11722.2	18402.8	11114.6	8416.67	18343.8	11715.3	11017.4	14777.8
CDS	peg.923	Q7A_939	949732	950073	342	+	hypothetical protein	Fis family transcriptional regulator; AFI83781.1	1074	894	1348	894	769	1620	1068	1093	1317	CDS	peg.953	962143	962484	342	+	hypothetical protein	CDW43_RS04685	CDW43_RS04685	hypothetical protein	hypothetical protein			454	389	1538	1261	1537	853	1290	1473	314		3140.35	2614.04	3941.52	2614.04	2248.54	4736.84	3122.81	3195.91	3850.88
CDS	peg.924	Q7A_940	950116	952560	2445	-	FIG00933687: hypothetical protein	SAM-dependent methyltransferase; AFI83782.2	4340	2574	4384	5131	4676	7650	4624	4977	6988	CDS	peg.954	962527	964971	2445	-	FIG00933687: hypothetical protein	CDW43_RS04690	CDW43_RS04690	spermidine synthase	spermidine synthase			1798	1408	4008	4045	5350	2913	2660	3271	658		1775.05	1052.76	1793.05	2098.57	1912.47	3128.83	1891.21	2035.58	2858.08
CDS	peg.925	Q7A_941	952560	953315	756	-	Protein-L-isoaspartate O-methyltransferase (EC 2.1.1.77)	protein-L-isoaspartate O-methyltransferase; AFI83783.1	1488	884	1305	1562	1536	2446	1734	1652	2003	CDS	peg.955	964971	965726	756	-	Protein-L-isoaspartate O-methyltransferase (EC 2.1.1.77)	CDW43_RS04695	CDW43_RS04695	protein-L-isoaspartate(D-aspartate) O-methyltransferase	protein-L-isoaspartate(D-aspartate) O-methyltransferase			556	516	1267	1265	1689	875	1365	1428	421		1968.25	1169.31	1726.19	2066.14	2031.75	3235.45	2293.65	2185.19	2649.47
CDS	peg.926	#N/A	953690	954562	873	+	hypothetical protein	#N/A	8716	6012	9562	8641	7215	12884	5165	5357	5714	CDS	peg.956	966101	966973	873	+	hypothetical protein	CDW43_RS04700	CDW43_RS04700	serine/threonine protein kinase	serine/threonine protein kinase			2834	2601	10373	10769	12569	6519	4763	4732	1062		9983.96	6886.6	10953	9898.05	8264.6	14758.3	5916.38	6136.31	6545.25
CDS	peg.927	Q7A_943	954849	955937	1089	-	hypothetical protein	endonuclease; AFI83785.1	6215	4071	6328	4321	3666	7902	4718	4863	5684	CDS	peg.957	967260	968348	1089	-	hypothetical protein	CDW43_RS04705	#N/A	endonuclease/exonuclease/phosphatase family protein	#N/A			1962	1660	7294	4210	6414	3780	6013	5723	895		5707.07	3738.29	5810.84	3967.86	3366.39	7256.2	4332.42	4465.56	5219.47
CDS	peg.928	#N/A	956027	956155	129	+	hypothetical protein	#N/A	985	610	994	911	733	1371	738	824	1049	CDS	peg.958	968438	968566	129	+	hypothetical protein	#N/A	#N/A	#N/A	#N/A			204	181	939	968	1148	677	874	983	160		7635.66	4728.68	7705.43	7062.02	5682.17	10627.9	5720.93	6387.6	8131.78
CDS	peg.929	Q7A_945	956547	958442	1896	+	Predicted signal-transduction protein containing cAMP-binding and CBS domains	cyclic nucleotide-binding protein; AFI83787.1	30590	18865	28299	27598	24459	41571	13660	13699	13881	CDS	peg.959	968958	970853	1896	+	Predicted signal-transduction protein containing cAMP-binding and CBS domains	CDW43_RS04710	CDW43_RS04710	DUF294 nucleotidyltransferase-like domain-containing protein	DUF294 nucleotidyltransferase-like domain-containing protein			11616	9775	27863	23165	32042	17158	14276	14114	3126		16134	9949.89	14925.6	14555.9	12900.3	21925.6	7204.64	7225.21	7321.2
CDS	peg.930	Q7A_946	958446	959168	723	+	DNA polymerase III epsilon subunit (EC 2.7.7.7)	DNA polymerase III subunit epsilon; AFI83788.1	10835	6355	10215	8661	7289	14027	6152	6270	6946	CDS	peg.960	970857	971579	723	+	DNA polymerase III epsilon subunit (EC 2.7.7.7)	CDW43_RS04715	CDW43_RS04715	3'-5' exonuclease	3'-5' exonuclease			3765	3126	8976	5138	8315	4652	7274	6400	973		14986.2	8789.76	14128.6	11979.3	10081.6	19401.1	8508.99	8672.2	9607.19
CDS	peg.931	Q7A_947	959179	960831	1653	-	High-affinity choline uptake protein BetT	BCCT transporter; AFI83789.1	18630	10301	16437	13980	12030	23307	8704	8229	9165	CDS	peg.961	971590	972843	1254	-	High-affinity choline uptake protein BetT	CDW43_RS04720	#N/A	BCCT family transporter	#N/A			5106	4196	13165	6636	11743	7232	6777	5988	1080		11270.4	6231.7	9943.74	8457.35	7277.68	14099.8	5265.58	4978.22	5544.46
CDS	peg.932	Q7A_948	960929	962209	1281	-	FIG00609243: hypothetical protein	hypothetical protein; AFI83790.2	21060	11441	17710	18824	15861	28877	9484	10133	10020	CDS	peg.962	973340	974704	1365	-	FIG00609243: hypothetical protein	CDW43_RS04725	#N/A	hypothetical protein	#N/A			6528	5475	23219	21634	30913	16172	7031	7877	2431		16440.3	8931.3	13825.1	14694.8	12381.7	22542.5	7403.59	7910.23	7822.01
CDS	peg.933	Q7A_949	962749	963162	414	+	hypothetical protein	universal stress protein; AFI83791.1	3421	2043	3150	3126	2833	4203	1939	2058	1893	CDS	peg.963	975160	975573	414	+	hypothetical protein	CDW43_RS04730	CDW43_RS04730	universal stress protein	universal stress protein			1393	1107	3139	3195	4197	2114	1404	1670	883		8263.29	4934.78	7608.7	7550.72	6843	10152.2	4683.57	4971.01	4572.46
CDS	peg.934	#N/A	963326	963448	123	-	hypothetical protein	#N/A	920	604	929	774	660	1286	495	555	557	CDS	peg.964	975737	975859	123	-	hypothetical protein	CDW43_RS16255	#N/A	hypothetical protein	#N/A			161	212	943	723	995	550	382	389	93		7479.67	4910.57	7552.85	6292.68	5365.85	10455.3	4024.39	4512.2	4528.46
CDS	peg.935	Q7A_951	963685	964599	915	-	Phytoene synthase (EC 2.5.1.32)	squalene synthase HpnC; AFI83793.1	11915	7656	11750	13037	12056	19648	8906	10001	11046	CDS	peg.965	976096	977010	915	-	Phytoene synthase (EC 2.5.1.32)	CDW43_RS04735	#N/A	squalene synthase HpnC	#N/A			3581	3166	11470	11387	14328	7415	5547	5978	1480		13021.9	8367.21	12841.5	14248.1	13176	21473.2	9733.33	10930.1	12072.1
CDS	peg.936	Q7A_952	964589	965875	1287	-	DNA recombination protein RmuC	DNA recombination protein RmuC; AFI83794.1	7709	4973	8009	7609	5623	11989	5729	6021	6736	CDS	peg.966	977000	978286	1287	-	DNA recombination protein RmuC	CDW43_RS04740	CDW43_RS04740	DNA recombination protein RmuC	DNA recombination protein RmuC			2318	2084	7546	5405	8374	4757	4982	3968	616		5989.9	3864.02	6223	5912.2	4369.08	9315.46	4451.44	4678.32	5233.88
CDS	peg.937	Q7A_953	965866	966525	660	-	Similar to phosphoglycolate phosphatase, clustered with ubiquinone biosynthesis SAM-dependent O-methyltransferase	phosphoglycolate phosphatase%2C bacterial; AFI83795.1	7385	5242	7475	7444	5932	10995	4818	5016	5252	CDS	peg.967	978277	978936	660	-	Similar to phosphoglycolate phosphatase, clustered with ubiquinone biosynthesis SAM-dependent O-methyltransferase	CDW43_RS04745	CDW43_RS04745	HAD-IA family hydrolase	HAD-IA family hydrolase			2336	2050	6503	5680	7948	4569	3490	3146	629		11189.4	7942.42	11325.8	11278.8	8987.88	16659.1	7300	7600	7957.58
CDS	peg.938	Q7A_954	966525	967226	702	-	3-demethylubiquinone-9 3-methyltransferase (EC 2.1.1.64)	bifunctional 3-demethylubiquinone 3-O-methyltransferase/2-octaprenyl-6-hydroxy phenol methylase; AFI83796.1	9625	6529	9027	8337	7733	13076	6383	6566	6583	CDS	peg.968	978936	979637	702	-	3-demethylubiquinone-9 3-methyltransferase (EC 2.1.1.64)	CDW43_RS04750	CDW43_RS04750	bifunctional 2-polyprenyl-6-hydroxyphenol methylase/3-demethylubiquinol 3-O-methyltransferase UbiG	bifunctional 2-polyprenyl-6-hydroxyphenol methylase/3-demethylubiquinol 3-O-methyltransferase UbiG			3060	2725	7625	7149	9397	4959	4397	3932	959		13710.8	9300.57	12859	11876.1	11015.7	18626.8	9092.59	9353.28	9377.49
CDS	peg.939	Q7A_955	967223	968542	1320	-	S-adenosylhomocysteine deaminase (EC 3.5.4.28) Methylthioadenosine deaminase	N-ethylammeline chlorohydrolase; AFI83797.1	11450	7501	10543	11455	9752	15785	9972	10588	10003	CDS	peg.969	979634	980953	1320	-	S-adenosylhomocysteine deaminase (EC 3.5.4.28) Methylthioadenosine deaminase	CDW43_RS04755	CDW43_RS04755	TRZ/ATZ family hydrolase	TRZ/ATZ family hydrolase			4331	3235	8077	7523	10174	5332	6486	6573	1307		8674.24	5682.58	7987.12	8678.03	7387.88	11958.3	7554.55	8021.21	7578.03
CDS	peg.940	Q7A_956	968580	969632	1053	+	Methylthioribose-1-phosphate isomerase (EC 5.3.1.23)	S-methyl-5-thioribose-1-phosphate isomerase; AFI83798.1	8803	5808	8551	8273	6534	12184	9215	9589	10189	CDS	peg.970	980991	982043	1053	+	Methylthioribose-1-phosphate isomerase (EC 5.3.1.23)	#N/A	CDW43_RS04760	#N/A	S-methyl-5-thioribose-1-phosphate isomerase			2603	2300	8337	7347	10324	5272	5133	5296	1342		8359.92	5515.67	8120.61	7856.6	6205.13	11570.8	8751.19	9106.36	9676.16
CDS	peg.941	Q7A_957	969643	970317	675	+	Short-chain dehydrogenase/reductase (SDR) superfamily	short-chain dehydrogenase; AFI83799.1	11447	7699	10523	11755	9889	16860	11074	11844	11568	CDS	peg.971	982054	982728	675	+	Short-chain dehydrogenase/reductase (SDR) superfamily	CDW43_RS04765	CDW43_RS04765	SDR family oxidoreductase	SDR family oxidoreductase			4191	3753	10756	12292	15921	7937	5297	6130	1743		16958.5	11405.9	15589.6	17414.8	14650.4	24977.8	16405.9	17546.7	17137.8
CDS	peg.942	Q7A_958	970311	971204	894	+	hypothetical protein	hypothetical protein; AFI83800.1	11268	7709	11577	14231	9927	18290	10242	10348	11378	CDS	peg.972	982722	983615	894	+	hypothetical protein	CDW43_RS04770	CDW43_RS04770	phosphotransferase	phosphotransferase			3601	3365	10374	8913	12156	6992	6745	7144	973		12604	8623.04	12949.7	15918.3	11104	20458.6	11456.4	11574.9	12727.1
CDS	peg.943	Q7A_959	971201	971824	624	-	Predicted thiamin transporter PnuT	nicotinamide mononucleotide transporter PnuC; AFI83801.1	7880	4829	7096	10423	7571	12791	9572	8087	9686	CDS	peg.973	983612	984235	624	-	Predicted thiamin transporter PnuT	CDW43_RS04775	CDW43_RS04775	nicotinamide riboside transporter PnuC	nicotinamide riboside transporter PnuC			3195	2607	6411	3995	6276	3837	6222	6327	671		12628.2	7738.78	11371.8	16703.5	12133	20498.4	15339.7	12959.9	15522.4
CDS	peg.944	Q7A_960	971824	972081	258	-	hypothetical protein	hypothetical protein; AFI83802.1	3722	2581	3757	5493	3284	6483	4786	3892	4640	CDS	peg.974	984235	984492	258	-	hypothetical protein	CDW43_RS04780	CDW43_RS04780	hypothetical protein	hypothetical protein			1342	1231	4004	2205	3545	2253	3049	3016	358		14426.4	10003.9	14562	21290.7	12728.7	25127.9	18550.4	15085.3	17984.5
CDS	peg.945	Q7A_961	972103	974169	2067	-	TonB-dependent receptor	TonB-dependent receptor; AFI83803.1	24470	18059	26743	38275	23743	45486	30567	24902	29317	CDS	peg.975	984514	986580	2067	-	TonB-dependent receptor	CDW43_RS04785	CDW43_RS04785	TonB-dependent receptor	TonB-dependent receptor			7841	7825	24459	14550	23970	14455	17917	20218	3358		11838.4	8736.82	12938.1	18517.2	11486.7	22005.8	14788.1	12047.4	14183.4
CDS		#N/A	974219	974398	180	-	MxaD protein	#N/A	1698	1040	1623	1975	1326	2450	1315	1315	1555	CDS	peg.976	986630	986809	180	-	MxaD protein	#N/A	#N/A	#N/A	#N/A			641	528	1399	767	1347	777	1044	1101	251		9433.33	5777.78	9016.67	10972.2	7366.67	13611.1	7305.56	7305.56	8638.89
Ribow		0	974231	974336	106	-	thiamine pyrophosphate riboswitch	TPP riboswitch	1505	920	1458	1757	1174	2207	1159	1165	1383	Ribosw		986639	986744	106	-	thiamine pyrophosphate riboswitch	#N/A	#N/A	#N/A	#N/A			588	482	1264	699	1247	715	929	989	218		14198.1	8679.25	13754.7	16575.5	11075.5	20820.8	10934	10990.6	13047.2
[truncated: 1,934 more rows]
[truncated: 27 more columns]

## Sheet: PCoA
	10001x	10002x	10003x	10004x	10005x	10006x	10007x	10008x	10009x	10010x	10011x	10012x	10013x	10014x	10015x	10016x	10017x	10018x	10019x	10020x	10021x	10022x	10023x	10024x	10025x	10026x	10027x	10028x	10029x	10030x	10031x	10032x	10033x	10034x	10035x	10036x	10037x	10038x	10039x	10040x	10041x	10042x	10043x	10044x	10045x	10046x	10047x	10048x	10049x
[truncated: 37 more rows]
[truncated: 2,764 more columns]

[truncated: 1 more sheets: Annotations]
