# Supplementary material for: The bacterial strains JAM1T and GP59 of the species Methylophaga nitratireducenticrescens differ in their expression profiles of denitrification genes in oxic and anoxic cultures
Source: PeerJ. 2024 Oct 28;12:e18361. doi: 10.7717/peerj.18361 (PMC11526790; doi:10.7717/peerj.18361)
Supplement: Supplemental Information 4 [file peerj-12-18361-s004.xlsx]

## Sheet: Instructions
	Data represent results from EdgeR analysis
		Values correspond fold changes (FC) between one condition to the other.
			In GO/GAN, for example, positive values refer to genes with relative transcript levels higher in the «O» conditions than «AN» conditions,
			and negative values refer to the opposite.
		FDR: False discovery rate. FDR<0.05 are highlighted in yellow
		FC >2 (red) or <-2 (blue)
		G: strain GP59; J: strain JAM1T. O, AN, ON : «O», «AN» and «ON» conditions, repectively.

## Sheet: GP59 vs O-ON-N
Gene tag	Annotations		FC GO-GON	FDR	FC GO-GAN	FDR	FC GON-GAN	FDR
	GenBank	RAST
		nirK
CDW43_RS15160	nitrite reductase%2C copper-containing	copper-containing nitrite reductase	2.63103	0.019502	19.7555	1.71763e-05	7.50863	0.000114215
		nor1
CDW43_RS01925	CbbQ/NirQ/NorQ/GpvN family protein	CbbQ/NirQ/NorQ/GpvN family protein	0.702639	0.171486	0.594724	0.0363804	0.846415	0.456421
CDW43_RS01930	VWA domain-containing protein	VWA domain-containing protein	0.768485	0.133032	0.411632	0.000316737	0.53564	0.00178607
CDW43_RS01935	cbb3-type cytochrome c oxidase subunit I	cbb3-type cytochrome c oxidase subunit I	0.789634	0.201932	0.292093	8.0836e-05	0.369909	0.000201211
CDW43_RS01940	cytochrome c	cytochrome c	0.644484	0.0566846	0.164066	1.85476e-05	0.254569	9.20593e-05
			-1.37741		-3.41		-2.42
		nor1RE
CDW43_RS01945	nitric oxide reductase transcriptional regulator NorR	nitric oxide reductase transcriptional regulator NorR	0.853005	0.599021	0.22785	0.000466173	0.267115	0.000681868
CDW43_RS01950	cytochrome c oxidase subunit 3	cytochrome c oxidase subunit 3	1.05061	0.833862	0.173259	2.84859e-05	0.164912	2.6874e-05
			-1.05042		-5.08		-4.9
		nar2
CDW43_RS02165	respiratory nitrate reductase subunit gamma	respiratory nitrate reductase subunit gamma	0.487095	0.0177894	0.766244	0.193303	1.57309	0.0365168
CDW43_RS02170	nitrate reductase molybdenum cofactor assembly chaperone	nitrate reductase molybdenum cofactor assembly chaperone	0.380867	0.0119651	1.78378	0.0126705	4.68347	6.24144e-05
CDW43_RS02175	nitrate reductase subunit beta	nitrate reductase subunit beta	0.332739	0.0171323	2.59411	0.00681168	7.79622	0.000113253
CDW43_RS02180	nitrate reductase subunit alpha	nitrate reductase subunit alpha	0.401332	0.0162916	1.70194	0.0296882	4.24073	0.000143561
			-2.5		1.712		4.573
		nor2
CDW43_RS02185	hypothetical protein	hypothetical protein	0.78457	0.186146	1.12173	0.486395	1.42973	0.0381919
CDW43_RS02190	CbbQ/NirQ/NorQ/GpvN family protein	CbbQ/NirQ/NorQ/GpvN family protein	0.715811	0.0618004	1.80379	0.00246025	2.51992	0.000158116
CDW43_RS02195	cbb3-type cytochrome c oxidase subunit I	cbb3-type cytochrome c oxidase subunit I	0.578033	0.0176989	1.24088	0.144175	2.14672	0.000415862
CDW43_RS02200	c-type cytochrome	cytochrome c	0.574652	0.0294118	0.931691	0.727619	1.62131	0.0213051
			-1.5083		1.275		1.929
		nosR
CDW43_RS02060	regulatory protein NosR	NosR/NirI family protein	1.0333	0.838304	0.556602	0.00134838	0.538664	0.000801962
			1.033		-1.79662		-1.85645
		nos
CDW43_RS02065	nitrous-oxide reductase	TAT-dependent nitrous-oxide reductase	0.948954	0.732798	0.840347	0.186155	0.885551	0.3478
CDW43_RS02070	nitrous oxide reductase family maturation protein NosD	nitrous oxide reductase family maturation protein NosD	1.02861	0.911093	1.14226	0.517882	1.11049	0.603345
CDW43_RS02075	ABC transporter ATP-binding protein	ABC transporter ATP-binding protein	1.1503	0.528308	1.06524	0.762636	0.926054	0.702037
CDW43_RS02080	ABC transporter permease	ABC transporter permease subunit	1.10758	0.583823	1.55766	0.0184578	1.40636	0.0483179
CDW43_RS02085	nitrous oxide reductase accessory protein NosL	nitrous oxide reductase accessory protein NosL	1.05727	0.786954	1.14157	0.451946	1.07973	0.662948
			1.059		1.149		1.082
		cAMP CRP
CDW43_RS01710	Crp/Fnr family transcriptional regulator (NnrR??)	Crp/Fnr family transcriptional regulator	1.30221	0.230981	0.59058	0.0198422	0.453523	0.00217288
			1.30221		-1.69325		-2.20496
		cAMP CRP
CDW43_RS04710	cyclic nucleotide-binding/CBS domain-containing protein	DUF294 nucleotidyltransferase-like domain-containing protein	1.26346	0.0584068	0.981957	0.898753	1.28668	0.0407304
			1.26346		-1.01837		1.28668
		cAMP CRP
CDW43_RS08015	cAMP-activated global transcriptional regulator CRP		0.925281	0.740472	0.714099	0.179721	1.29573	0.235971
			-1.08075		-1.40037		1.29573
		cAMP CRP
CDW43_RS07735	cAMP-binding proteins - catabolite gene activator and regulatory subunit of cAMP-dependent protein kinases	winged helix-turn-helix domain-containing protein	0.709627	0.0778611	0.644219	0.0518897	1.10153	0.598236
			-1.40919		-1.55227		1.10153
		nnrS1
CDW43_RS00310	NnrS1 family protein	NnrS family protein	0.731794	0.348762	0.302391	0.0029851	0.41322	0.011214
			-1.36651		-3.30697		-2.42002
		nsrR1
CDW43_RS00315	Rrf2 family transcriptional regulator, nsrR1	Rrf2 family transcriptional regulator	0.720041	0.312727	0.271069	0.00165176	0.376463	0.00623415
			-1.38881		-3.6891		-2.6563
		dnrN/ytfE
CDW43_RS00320	iron-sulfur cluster repair protein YtfE	iron-sulfur cluster repair protein YtfE	0.486678	0.0723176	0.0987273	0.000180589	0.20286	0.000862086
			-2.05475		-10.1289		-4.92951
		nnrS2
CDW43_RS01960	NnrS2 family protein	NnrS family protein	0.932357	0.582398	0.479489	0.000156807	0.514277	0.000202156
			-1.07255		-2.08555		-1.94448
		nnrS3
CDW43_RS08605	NnrS3 family protein	NnrS family protein	0.115991	0.000483956	0.507	0.0153333	4.37103	0.000210909
			-8.62135		-1.97239		4.371
		nsrR2
CDW43_RS01825	Rrf2 family transcriptional regulator, nsrR2	Rrf2 family transcriptional regulator	0.664725	0.0258007	1.44982	0.0164705	2.18108	0.000236116
			-1.50438		1.45		2.181
		hmp1
CDW43_RS01835	NO-inducible flavohemoprotein hmp1	FAD-binding oxidoreductase	0.983527	0.896879	0.605731	0.000822196	0.615877	0.000803292
			-1.01675		-1.6509		-1.6237
		hmp2
CDW43_RS09635	NO-inducible flavohemoprotein hmp2	NO-inducible flavohemoprotein	0.674586	0.0868373	0.692486	0.0705224	1.02653	0.900609
			-1.48239		-1.44407		1.027
		iscRSA
CDW43_RS07315	Rrf2 family transcriptional regulator, nsrR3	iscR	0.276873	0.0162916	0.434222	0.0124699	1.56831	0.113035
CDW43_RS07320	cysteine desulfurase	iscS, NFS1	0.324396	0.0162916	0.319665	0.00158648	0.985416	0.958179
CDW43_RS07325	iron-sulfur cluster assembly accessory protein	iscA	0.423731	0.011504	0.231357	3.9156e-05	0.545999	0.00436711
			-2.92398		-3.04878		1.033
		sufA/RBCDSEX
CDW43_RS00635	iron-sulfur cluster insertion protein ErpA	iron-sulfur cluster insertion protein ErpA	0.434622	0.0283031	0.31217	0.0196355	1.39226	0.32366
CDW43_RS07490	SUF system Fe-S cluster assembly regulator	SUF system Fe-S cluster assembly regulator	0.266447	0.000286315	0.452731	0.0176989	0.266447	0.000286315
CDW43_RS07495	Fe-S cluster assembly protein SufB	Fe-S cluster assembly protein SufB	0.187665	0.000499191	0.455636	0.0420831	0.187665	0.000499191
CDW43_RS07500	Fe-S cluster assembly ATPase SufC	Fe-S cluster assembly ATPase SufC	0.209276	0.000114241	0.453002	0.0176989	0.209276	0.000114241
CDW43_RS07505	Fe-S cluster assembly protein SufD	Fe-S cluster assembly protein SufD	0.255116	0.000136284	0.479614	0.0176989	0.255116	0.000136284
CDW43_RS07510	cysteine desulfurase	cysteine desulfurase	0.386412	0.000299991	0.562992	0.0176989	0.386412	0.000299991
CDW43_RS07515	SUF system NifU family Fe-S cluster assembly protein	MULTISPECIES: Fe-S cluster assembly sulfur transfer protein SufU [Methylophaga]	0.391469	8.28618e-05	0.545774	0.0119668	0.391469	8.28618e-05
CDW43_RS07520	SUF system Fe-S cluster assembly protein	MULTISPECIES: SUF system Fe-S cluster assembly protein [Methylophaga]	0.344287	1.71385e-05	0.643946	0.016997	0.344287	1.71385e-05
			-3.23194		-2.0482		-2.33037

## Sheet: JAM1 vs O-ON-N
Gene tag	Annotations		GeneID	FC JO-JON	FDR	FC JO-JAN	FDR	FC JON-JAN	FDR
	GenBank	RAST
	nor1
Q7A_431	CbbQ/NirQ/NorQ/GpvN family protein	Nitric oxide reductase activation protein NorQ	10399x	0.916263	0.465728	0.827163	0.0713942	0.902757	0.317168
Q7A_432	nitric oxide reductase activation protein NorD	Nitric oxide reductase activation protein NorD	10400x	0.829873	0.107465	0.483327	1.79977e-05	0.58241	0.000189567
Q7A_433	nitric-oxide reductase large subunit	Nitric-oxide reductase subunit B (EC 1.7.99.7)	10401x	0.826654	0.213538	0.217466	1.10909e-06	0.263068	3.59115e-06
Q7A_434	cytochrome C	Nitric-oxide reductase subunit C (EC 1.7.99.7)	10402x	0.881103	0.352094	0.129755	1.48274e-07	0.147264	3.00209e-07
				-1.15875		-2.41546		-2.1097
	nor1RE
Q7A_435	nitric oxide reductase transcription regulator	Functional role page for Anaerobic nitric oxide reductase transcription regulator NorR	10403x	0.714125	0.0133528	0.235223	2.66449e-07	0.329387	1.63398e-06
Q7A_436	hypothetical protein	Nitric oxide reductase activation protein NorE	10404x	0.840028	0.0516633	0.27969	1.0504e-07	0.332953	3.29148e-07
				-1.28687		-3.89105		-3.02115
	nor2
Q7A_485	VWA domain-containing protein	Nitric oxide reductase activation protein NorD	10451x	0.674055	0.0013384	1.75915	5.734e-06	2.6098	3.9441e-07
Q7A_486	CbbQ/NirQ/NorQ/GpvN family protein	Nitric oxide reductase activation protein NorQ	10452x	0.557612	0.00089201	2.01112	8.55943e-06	3.60667	3.71995e-07
Q7A_487	nitric-oxide reductase large subunit	Nitric-oxide reductase subunit B (EC 1.7.99.7)	10453x	0.480604	0.00010395	1.20267	0.0222843	2.50242	1.10057e-06
Q7A_488	cytochrome C	Nitric-oxide reductase subunit C (EC 1.7.99.7)	10454x	0.49822	0.00022177	0.804931	0.0127903	1.61561	9.3087e-05
				-1.80832		1.444		2.584
	nosR
Q7A_458	regulatory protein NosR	Nitrous oxide reductase maturation protein NosR	10426x	0.908008	0.323067	0.280198	2.48171e-07	0.308585	5.94137e-07
				-1.10131		-3.56891		-3.24059
	nos
Q7A_459	TAT-dependent nitrous-oxide reductase	Nitrous-oxide reductase (EC 1.7.99.6)	10427x	1.17003	0.0906907	0.718927	0.000951369	0.614449	7.85813e-05
Q7A_461	copper-binding protein	Nitrous oxide reductase maturation protein NosD	10428x	1.00291	0.975334	0.879949	0.0803665	0.877395	0.0790092
Q7A_462	ABC transporter ATP-binding protein	Nitrous oxide reductase maturation protein NosF (ATPase)	10429x	0.944576	0.457031	0.961771	0.54626	1.0182	0.784138
Q7A_463	hypothetical protein	Nitrous oxide reductase maturation transmembrane protein NosY	10430x	1.08108	0.291385	1.55631	3.23757e-05	1.43958	0.000167649
Q7A_464	nitrous oxide reductase accessory protein NosL	Nitrous oxide reductase maturation protein, outer-membrane lipoprotein NosL	10431x	1.06742	0.398425	1.14805	0.0473924	1.07554	0.274102
				1.053		1.053		1.005
	cAMP CRP
Q7A_386	cyclic nucleotide-binding protein	cAMP-binding proteins - catabolite gene activator and regulatory subunit of cAMP-dependent protein kinases	10358x	1.59465	0.005636	1.51725	0.00184421	0.951462	0.644551
				1.59465		1.51725		-1.05101
	cAMP CRP
Q7A_945	cyclic nucleotide-binding protein	Predicted signal-transduction protein containing cAMP-binding and CBS domains	10915x	0.978462	0.771648	1.53844	2.59804e-05	0.951462	0.644551
				-1.02201		1.53844		-1.05101
	cAMP CRP
Q7A_1583	HP	cAMP-binding proteins - catabolite gene activator and regulatory subunit of cAMP-dependent protein kinases	11539x	0.917009	0.397011	0.923221	0.359073	1.00677	0.945755
				-1.0905		-1.08316		1.00677
	cAMP CRP
Q7A_1671	transcriptional regulator Crp	Cyclic AMP receptor protein	11619x	0.873364	0.206205	0.966962	0.711045	1.10717	0.266125
				-1.145		-1.03417		1.10717
	nnrs1
Q7A_66	NnrS1 family protein	NnrS protein involved in response to NO	10061x	0.608821	0.0226615	0.115566	6.61114e-07	0.189819	3.91808e-06
				-1.64252		-8.65306		-5.26817
	nsrR1
Q7A_67	Rrf2 family transcriptional regulator NsrR1	Nitrite-sensitive transcriptional repressor NsrR	10062x	0.778683	0.122608	0.166511	6.16675e-07	0.213837	1.97258e-06
				-1.28422		-6.00561		-4.67646
	dnrN/ytfE
Q7A_68	iron-sulfur cluster repair di-iron protein	Nitric oxide-dependent regulator DnrN or NorA	10063x	0.784589	0.0797068	0.0629992	4.49059e-08	0.0802958	1.06931e-07
				-1.27455		-15.8732		-12.454
	nnrS2
Q7A_438	NnrS2 family protein	NnrS protein involved in response to NO	10406x	0.883805	0.187747	0.438554	2.06278e-06	0.496211	8.22666e-06
				-1.13147		-2.28022		-2.01527
	nnrS3
Q7A_1801	NnrS3 family protein	NnrS protein involved in response to NO	11741x	0.532599	0.0183855	0.325254	0.000135081	0.610692	0.0219715
				-1.87759		-3.07452		-1.63749
	nsrR2
Q7A_409	Rrf2 family transcriptional regulator NsrR2	Nitrite-sensitive transcriptional repressor NsrR	10380x	0.950277	0.632163	1.57929	0.000292575	1.66192	0.000172425
				-1.05232		1.57929		1.66192
	hmp1
Q7A_410	nitric oxide dioxygenase hmp1	Flavohemoprotein (Hemoglobin-like protein) (Flavohemoglobin) (Nitric oxide dioxygenase) (EC 1.14.12.17)	10381x	0.595837	0.0012376	0.463535	4.12557e-06	0.777957	0.00880513
				-1.67831		-2.15733		-1.28542
	hmp2
Q7A_1974	nitric oxide dioxygenase hmp2	Flavohemoprotein (Hemoglobin-like protein) (Flavohemoglobin) (Nitric oxide dioxygenase) (EC 1.14.12.17)	11916x	1.09896	0.44391	1.14325	0.199221	1.04031	0.708246
				1.09896		1.14325		1.04031
	iscRSA
Q7A_1499	[Fe-S]-binding protein NsrR3	Iron-sulfur cluster regulator IscR nsrR3	11456x	0.559072	0.00861197	0.314909	1.5391e-05	0.563272	0.00216199
Q7A_1500	cysteine desulfurase	iscS, NFS1	11457x	0.547926	0.0122468	0.239105	8.41385e-06	0.436382	0.000448707
Q7A_1501	iron-sulfur cluster assembly accessory protein	iscA	11458x	0.81602	0.207751	0.241531	2.30622e-06	0.295987	8.40437e-06
				-1.56006		-3.77358		-2.31481
	sufA/RBCDSEX
Q7A_138	iron-sulfur cluster insertion protein ErpA	probable iron binding protein from the HesB_IscA_SufA family	10127x	0.715093	0.0253197	0.479733	5.34793e-05	0.670868	0.00378678
Q7A_1533	SUF system Fe-S cluster assembly regulator	Iron-sulfur cluster regulator IscR	11491x	0.533255	0.00793065	0.135805	7.93678e-07	0.254672	9.72997e-06
Q7A_1534	Fe-S cluster assembly protein SufB	Iron-sulfur cluster assembly protein SufB	11492x	0.506156	0.00634132	0.214885	4.03134e-06	0.424543	0.000272276
Q7A_1535	ABC transporter ATP-binding protein	Iron-sulfur cluster assembly ATPase protein SufC	11493x	0.508325	0.00992359	0.191467	5.42844e-06	0.376662	0.000244006
Q7A_1536	Fe-S cluster assembly protein SufD	Iron-sulfur cluster assembly protein SufD	11494x	0.568112	0.0188071	0.276806	2.54598e-05	0.487238	0.00156765
Q7A_1537	cysteine desulfurase CsdA	Cysteine desulfurase (EC 2.8.1.7), SufS subfamily	11495x	0.562138	0.0183128	0.283346	3.12578e-05	0.50405	0.00224463
Q7A_1538	SUF system NifU family Fe-S cluster assembly protein	Putative iron-sulfur cluster assembly scaffold protein for SUF system, SufE2	11496x	0.639673	0.0315228	0.226969	4.94079e-06	0.35482	7.4398e-05
Q7A_1539	SUF system Fe-S cluster assembly protein	PaaD-like protein (DUF59) involved in Fe-S cluster assembly	11497x	0.906518	0.472182	0.543422	0.000243415	0.599461	0.000956254
				-1.61967		-3.40074		-2.17846

## Sheet: GP59 vs JAM1
Gene tag	Annotations		JAN-GAN	FDR	JO-GO	FDR	JON-GON	FDR	JAN-GO	FDR	JAN-GON	FDR	JON-GO	FDR	JON-GAN	FDR	JO-GAN	FDR	JO-GON	FDR
	GenBank	RAST
	nor1
Q7A_431	CbbQ/NirQ/NorQ/GpvN family protein	Nitric oxide reductase activation protein NorQ	0.630429	0.0152618	0.837005	0.581737	0.6289	0.0170766	1.02821	0.877315	0.711956	0.0503193	0.908264	0.669361	0.556884	0.00280984	0.513193	0.00110331	0.579559	0.00547626
Q7A_432	nitric oxide reductase activation protein NorD	Nitric oxide reductase activation protein NorD	0.737846	0.0184489	0.827102	0.320979	0.750381	0.0273967	1.73888	0.0001418	1.31668	0.0234247	0.990993	0.960214	0.420502	2.66993e-06	0.350959	4.74654e-07	0.626282	0.0012008
Q7A_433	nitric-oxide reductase large subunit	Nitric-oxide reductase subunit B (EC 1.7.99.7)	1.04638	0.772945	0.75018	0.194151	0.70204	0.0262188	3.50544	2.39381e-07	2.72739	2.54252e-06	0.902315	0.574697	0.269344	3.45056e-07	0.223931	1.05142e-07	0.583672	0.00184279
Q7A_434	cytochrome C	Nitric-oxide reductase subunit C (EC 1.7.99.7)	1.00956	0.954253	0.728631	0.18688	0.515171	0.000950587	5.70657	2.11241e-08	3.57483	4.73595e-07	0.822377	0.302291	0.145489	1.70164e-08	0.128904	1.23075e-08	0.456444	0.000202678
			-1.16815		-1.2727		-1.54054		2.995		2.083		-1.10377		-2.87311		-3.28681		-1.78098
	nor1RE
Q7A_435	nitric oxide reductase transcription regulator	Functional role page for Anaerobic nitric oxide reductase transcription regulator NorR	1.0537	0.808217	1.03805	0.942791	1.21633	0.343397	4.48716	1.25061e-06	3.77282	4.23866e-06	1.44663	0.122458	0.339706	5.40247e-05	0.243762	4.7115e-06	0.872797	0.502371
Q7A_436	hypothetical protein	Nitric oxide reductase activation protein NorE	0.662237	0.0084162	1.01981	0.960129	1.25106	0.129257	3.7072	1.16965e-07	3.83892	8.10811e-08	1.20814	0.266255	0.215816	6.07163e-08	0.182175	2.48973e-08	1.05605	0.708891
			-1.16554		1.029		1.234		4.097		3.806		1.327		-3.60022		-4.69553		-1.03689
	nor2
Q7A_485	VWA domain-containing protein	Nitric oxide reductase activation protein NorD	0.643042	0.0012765	0.962611	0.881728	1.09799	0.43584	0.556093	5.59129e-05	0.429921	1.19659e-06	1.42023	0.0145014	1.64229	0.000380181	1.11312	0.353044	0.744203	0.0169612
Q7A_486	CbbQ/NirQ/NorQ/GpvN family protein	Nitric oxide reductase activation protein NorQ	0.726339	0.00877651	0.776957	0.120421	0.95041	0.669236	0.392716	2.49214e-07	0.269255	7.28978e-09	1.3862	0.0169001	2.56381	5.2705e-07	1.43701	0.00332698	0.5327	7.10688e-05
Q7A_487	nitric-oxide reductase large subunit	Nitric-oxide reductase subunit B (EC 1.7.99.7)	0.77099	0.0215751	0.712867	0.0222978	0.840771	0.114261	0.602668	9.72434e-05	0.343288	3.37812e-08	1.47604	0.00440514	1.88829	1.6463e-05	0.911967	0.382373	0.406059	1.78821e-06
Q7A_488	cytochrome C	Nitric-oxide reductase subunit C (EC 1.7.99.7)	0.903927	0.505376	0.7518	0.192683	0.850407	0.276255	0.94963	0.723367	0.537834	0.000262608	1.50153	0.0214486	1.42926	0.0181471	0.715618	0.0259054	0.42579	5.39261e-05
			-1.31393		-1.24835		-1.06964		-1.59929		-2.53117		1.446		1.881		1.044		-1.89686
	nosR
Q7A_458	regulatory protein NosR	Nitrous oxide reductase maturation protein NosR	2.19519	1.58073e-06	1.05428	0.808402	1.1762	0.112966	3.82459	1.8187e-09	3.89484	1.53189e-09	1.15499	0.218367	0.662923	0.000465778	0.605118	8.19123e-05	1.07364	0.474702
			2.19519		1.05428		1.1762		3.82459		3.89484		1.15499		-1.50847		-1.65257		1.07364
Q7A_459	TAT-dependent nitrous-oxide reductase	Nitrous-oxide reductase (EC 1.7.99.6)	1.63088	6.21749e-05	1.33149	0.0237961	1.05869	0.547012	1.88252	1.9043e-06	1.7606	6.10327e-06	1.132	0.250988	0.980686	0.835348	1.1535	0.115988	1.24526	0.021985
Q7A_461	copper-binding protein	Nitrous oxide reductase maturation protein NosD	1.75473	0.00112722	1.2901	0.257491	1.29659	0.0869775	1.48986	0.00829232	1.51008	0.00656406	1.27924	0.152302	1.50666	0.00829212	1.51945	0.00741019	1.3076	0.0700354
Q7A_462	ABC transporter ATP-binding protein	Nitrous oxide reductase maturation protein NosF (ATPase)	1.58736	0.00392514	1.36853	0.131672	1.63341	0.00345548	1.44598	0.0115366	1.63927	0.00147872	1.44082	0.0327921	1.58168	0.00335672	1.50232	0.00756174	1.55146	0.00540489
Q7A_463	hypothetical protein	Nitrous oxide reductase maturation transmembrane protein NosY	1.29318	0.0373322	1.23351	0.247728	1.2385	0.0814517	0.805408	0.0617499	0.87911	0.252062	1.13467	0.372137	1.82185	7.6757e-05	1.98056	2.4179e-05	1.34639	0.0173525
Q7A_464	nitrous oxide reductase accessory protein NosL	Nitrous oxide reductase maturation protein, outer-membrane lipoprotein NosL	1.31802	0.0360119	1.26598	0.218108	1.22892	0.111421	1.1205	0.347789	1.16753	0.195973	1.17942	0.265468	1.38732	0.0130567	1.48913	0.00389186	1.31911	0.0334351
			1.517		1.298		1.291		1.349		1.391		1.233		1.456		1.529		1.354
	cAMP CRP
Q7A_386	cyclic nucleotide-binding protein	cAMP-binding proteins - catabolite gene activator and regulatory subunit of cAMP-dependent protein kinases	0.337175	7.59933e-06	0.828982	0.496181	0.66311	0.0185631	0.555275	0.000968504	0.712535	0.0327216	0.516758	0.00175751	0.313786	2.50123e-06	0.503375	0.000357973	1.06376	0.703743
			-2.96582		-1.2063		-1.50805		-1.80091		-1.40344		-1.93514		-3.18688		-1.98659
	cAMP CRP
Q7A_945	cyclic nucleotide-binding protein	Predicted signal-transduction protein containing cAMP-binding and CBS domains	0.813952	0.0112609	0.945711	0.715789	0.930577	0.350589	0.624824	5.63178e-06	0.60473	2.62446e-06	0.961499	0.682206	1.25254	0.00546594	1.23197	0.00907811	0.915297	0.239182
			-1.22857		-1.05741		-1.0746		-1.60045		-1.65363		-1.04004						-1.09254
	cAMP CRP
Q7A_1583	HP	cAMP-binding proteins - catabolite gene activator and regulatory subunit of cAMP-dependent protein kinases	0.915647	0.506316	1.13522	0.582257	0.784721	0.0586251	1.25004	0.0723119	0.796248	0.0579148	1.23195	0.159758	0.902392	0.410421	0.831538	0.144293	0.723107	0.0137728
			-1.09212		1.13522		-1.27434		1.25004		-1.25589		1.23195		-1.10817		-1.20259		-1.38292
	cAMP CRP
Q7A_1671	transcriptional regulator Crp	Cyclic AMP receptor protein	0.788399	0.162721	0.784761	0.365092	0.629138	0.0124697	0.830086	0.245464	0.584176	0.00261123	0.893975	0.587337	0.849079	0.316453	0.745349	0.0785662	0.552277	0.00215131
			-1.26839		-1.27427		-1.58948		-1.20469		-1.71181		-1.1186		-1.17775		-1.34165		-1.81068
	nnrS1
Q7A_66	NnrS1 family protein	NnrS protein involved in response to NO	2.02406	0.00991489	0.732324	0.464134	0.866614	0.585233	6.44172	1.61847e-06	4.66511	1.00707e-05	1.19665	0.56438	0.375999	0.000876842	0.230104	2.86636e-05	0.530351	0.0177399
			2.02406		-1.36552		-1.15392		6.44172		4.66511		1.19665		-2.65958		-4.34586		-1.88554
	nsrR1
Q7A_67	Rrf2 family transcriptional regulator NsrR1	Nitrite-sensitive transcriptional repressor NsrR	1.35545	0.206535	0.794827	0.601621	0.72066	0.174961	4.85215	4.2511e-06	3.44384	4.47802e-05	1.01536	0.96539	0.283643	6.00408e-05	0.222036	1.29138e-05	0.564133	0.0217314
			1.35545		-1.25814		-1.38762		4.85215		3.44384		1.01536		-3.52556		-4.50377		-1.77263
	dnrN/ytfE
Q7A_68	iron-sulfur cluster repair di-iron protein	Nitric oxide-dependent regulator DnrN or NorA	1.39132	0.204931	0.857803	0.775241	0.521716	0.0200386	13.8383	7.54458e-08	6.63916	1.55344e-06	1.08744	0.800915	0.109332	7.58931e-07	0.0862449	3.5746e-07	0.411546	0.00272276
			1.39132		-1.16577		-1.91675		13.8383		6.63916		1.08744		-9.14642		-11.5949		-2.42986
	nnrS2
Q7A_438	NnrS2 family protein	NnrS protein involved in response to NO	0.990037	0.908329	0.8641	0.253637	0.893532	0.184474	2.00256	2.30955e-07	1.84013	9.53292e-07	0.972407	0.79463	0.480743	2.99081e-07	0.427198	7.14702e-08	0.79401	0.0103073
			-1.01006		-1.15727		-1.11915		2.00256		1.84013		-1.02838		-2.08011		-2.34084		-1.25943
	nnrS3
Q7A_1801	NnrS3 family protein	NnrS protein involved in response to NO	1.44903	0.113388	0.897479	0.833666	0.191025	1.16274e-05	2.79603	0.000185894	0.319657	6.83194e-05	1.67088	0.0587494	0.865925	0.526879	0.465113	0.00273036	0.102605	6.98115e-07
			1.44903		-1.11423		-5.23493		2.79603		-3.12835		1.67088		-1.15483		-2.15002		-9.74614
	nsrR2
Q7A_409	Rrf2 family transcriptional regulator NsrR2	Nitrite-sensitive transcriptional repressor NsrR	1.11484	0.31446	1.34436	0.0437683	0.932343	0.515673	0.865326	0.15365	0.573226	3.00411e-05	1.40744	0.00908488	1.81328	2.64689e-05	1.73202	6.20945e-05	0.890561	0.265676
			1.11484		1.34436		-1.07257		-1.15563		-1.74451		1.40744		1.81328		1.73202		-1.12289
	hmp1
Q7A_410	nitric oxide dioxygenase hmp1	Flavohemoprotein (Hemoglobin-like protein) (Flavohemoglobin) (Nitric oxide dioxygenase) (EC 1.14.12.17)	0.971688	0.746162	0.692752	0.00196271	1.06781	0.444563	1.51895	5.62093e-05	1.40247	0.000395746	1.15651	0.139924	0.739827	0.00142415	0.44316	1.17806e-07	0.639626	0.000103261
			-1.02914		-1.44352		1.06781		1.51895		1.40247		1.15651		-1.35167		-2.25652		-1.56341
	hmp2
Q7A_1974	nitric oxide dioxygenase hmp2	Flavohemoprotein (Hemoglobin-like protein) (Flavohemoglobin) (Nitric oxide dioxygenase) (EC 1.14.12.17)	0.548117	0.00093807	0.863914	0.606464	0.51974	0.000745332	0.768091	0.0765736	0.510532	0.000192597	0.781943	0.172029	0.558002	0.000929687	0.616497	0.00384784	0.574224	0.00185553
			-1.82443		-1.15752		-1.92404		-1.30193		-1.95874		-1.27887		-1.79211		-1.62207		-1.74148
	IscRSA
Q7A_1499	[Fe-S]-binding protein NsrR3	IscR nsrR3	1.42107	0.142983	0.994245	0.99272	0.482929	0.00698063	3.20989	7.55029e-05	0.875908	0.558326	1.76976	0.0425763	0.783504	0.289921	0.44017	0.0020162	0.271308	9.36862e-05
Q7A_1500	cysteine desulfurase	iscS, NFS1	1.29718	0.257595	0.926223	0.878685	0.537728	0.0131558	3.93784	1.0258e-05	1.25903	0.282725	1.68184	0.0524807	0.554025	0.0126376	0.305112	6.73749e-05	0.296137	0.000112467
Q7A_1501	iron-sulfur cluster assembly accessory protein	iscA	0.857101	0.345819	0.853565	0.59148	0.434744	0.000167361	3.59315	4.80993e-07	1.50064	0.0125385	1.04095	0.849216	0.248307	4.37515e-07	0.203607	1.33372e-07	0.356483	2.56067e-05
			1.19179		-1.08146		-2.06129		3.58029		1.21186		1.49752		-1.89175		-3.16159		-3.24701
	sufA/RBCDSEX
Q7A_138	iron-sulfur cluster insertion protein ErpA	probable iron binding protein from the HesB_IscA_SufA family	0.74465	0.262207	0.784616	0.61961	0.000127912	0.33602	1.66297	0.0461613	0.511703	0.0113194	1.09202	0.792151	0.488989	0.00917354	0.351338	0.000654343	0.24143	0.000105719
Q7A_1533	SUF system Fe-S cluster assembly regulator	Iron-sulfur cluster regulator IscR	1.78061	0.00811323	0.874998	0.747442	0.728536	0.122293	6.54831	1.12127e-07	2.92201	3.15777e-05	1.63267	0.0408208	0.443956	0.000580177	0.237929	3.53125e-06	0.390445	0.000297317
Q7A_1534	Fe-S cluster assembly protein SufB	Iron-sulfur cluster assembly protein SufB	0.843997	0.512177	0.923077	0.885988	0.814738	0.42276	4.36575	1.48509e-05	1.96062	0.00896924	1.81419	0.0456696	0.350723	0.000468482	0.178452	6.04269e-06	0.414547	0.00236495
Q7A_1535	ABC transporter ATP-binding protein	Iron-sulfur cluster assembly ATPase protein SufC	0.978083	0.918938	0.854787	0.707822	0.747152	0.169251	4.54374	1.60388e-06	2.02879	0.00176295	1.67334	0.0392039	0.360203	0.000117985	0.184001	1.1787e-06	0.381664	0.000337758
Q7A_1536	Fe-S cluster assembly protein SufD	Iron-sulfur cluster assembly protein SufD	0.907295	0.634443	0.939868	0.885995	0.777771	0.202748	3.45072	5.45035e-06	1.63121	0.0129539	1.64533	0.0323808	0.432604	0.000335772	0.247119	3.34061e-06	0.44429	0.000689361
Q7A_1537	cysteine desulfurase CsdA	Cysteine desulfurase (EC 2.8.1.7), SufS subfamily	1.17353	0.375582	0.823244	0.523917	0.808137	0.236429	2.95257	7.99396e-06	1.63844	0.00686784	1.45631	0.0722238	0.578826	0.00431223	0.327207	1.11115e-05	0.456835	0.000441668
Q7A_1538	SUF system NifU family Fe-S cluster assembly protein	Putative iron-sulfur cluster assembly scaffold protein for SUF system, SufE2	1.5725	0.00633439	0.871815	0.634715	0.729321	0.0470135	3.89591	1.31564e-07	2.09576	6.86262e-05	1.35577	0.0879811	0.547228	0.000641786	0.35189	4.32566e-06	0.468983	0.000166998
Q7A_1539	SUF system Fe-S cluster assembly protein	PaaD-like protein (DUF59) involved in Fe-S cluster assembly	1.21485	0.0908308	1.82958	0.000379186	1.27419	0.0414583	3.4222	1.57862e-08	2.1721	1.85281e-06	2.00752	4.53513e-05	0.712655	0.00511328	0.649489	0.0008878	1.16125	0.181365
			1.15194		-1.0124		-1.36055		3.85527		1.87008		1.58464		-2.04333		-3.16528		-2.02048
