# Supplementary material for: The bacterial strains JAM1T and GP59 of the species Methylophaga nitratireducenticrescens differ in their expression profiles of denitrification genes in oxic and anoxic cultures
Source: PeerJ. 2024 Oct 28;12:e18361. doi: 10.7717/peerj.18361 (PMC11526790; doi:10.7717/peerj.18361)
Supplement: Supplemental Information 5 [file peerj-12-18361-s005.xlsx]

## Sheet: Figure 3
Differential Expression Counts:
	Genes				Percentage
	Up	Flat	Down	Total	Up	Down	total
GO/GAN	277	2631	289	3197	0.0866437	0.0903972	0.177041
GO/GON	128	2980	89	3197	0.0400375	0.0278386	0.0678761
GON/GAN	335	2489	373	3197	0.104786	0.116672	0.221458
JO/JON	32	2906	46	2984	0.0107239	0.0154155	0.0261394
JO/JAN	420	2132	432	2984	0.140751	0.144772	0.285523
JON/JAN	308	2321	355	2984	0.103217	0.118968	0.222185
JAN/GAN*	193	2425	195	2813	0.06861	0.069321	0.137931
JO/GO*	34	2737	42	2813	0.0120867	0.0149307	0.0270174
JON/GON*	138	2510	165	2813	0.0490579	0.0586562	0.107714
JAN/GO*	411	1991	411	2813	0.146107	0.146107	0.292215
JAN/GON*	439	1962	412	2813	0.156061	0.146463	0.302524
JON/GAN*	218	2276	319	2813	0.0774973	0.113402	0.190899
JON/GO*	73	2657	83	2813	0.0259509	0.0295059	0.0554568
JO/GAN*	232	2284	297	2813	0.0824742	0.105581	0.188055
JO/GON*	193	2424	196	2813	0.06861	0.0696765	0.138287
*: common genes only
								Table: Changes in the relative transcript levels
								Genes and riboswitches where the fold changes in the relative transcript levels between culture conditions and between strains
								were >2 with FDR<0.05.
								G: strain GP59. J: JAM1T. O: «O» conditions; ON: «ON» conditions; AN: «AN» conditions
								In GO/GAN, for example, Up refers to genes with relative transcript levels higher in the «O» conditions than those in the «AN» conditions, and
								Down refers to the opposite
