# Supplementary material for: The bacterial strains JAM1T and GP59 of the species Methylophaga nitratireducenticrescens differ in their expression profiles of denitrification genes in oxic and anoxic cultures
Source: PeerJ. 2024 Oct 28;12:e18361. doi: 10.7717/peerj.18361 (PMC11526790; doi:10.7717/peerj.18361)
Supplement: Supplemental Information 11 [file peerj-12-18361-s011.xls]

## Sheet: Sheet1
ITEM TO CHECK	IMPORTANCE	CHECKLIST
EXPERIMENTAL DESIGN
Definition of experimental and control groups	E	Lines: 122-138
Number within each group	E	line 133
Assay carried out by core lab or investigator's lab?	D
Acknowledgement of authors' contributions	D
SAMPLE
Description	E	Lines: 154-161
Volume/mass of sample processed	D	Lines: 154-155
Microdissection or macrodissection	E	not applicable
Processing procedure	E	Lines: 156-161
If frozen - how and how quickly?	E	Line 159
If fixed - with what, how quickly?	E	not applicable
Sample storage conditions and duration (especially for FFPE samples)	E	Line 159
NUCLEIC ACID EXTRACTION
Procedure and/or instrumentation	E	Line 162 (Reference Mauffrey)
Name of kit and details of any modifications	E	Line 162 (Reference Mauffrey)
Source of additional reagents used	D
Details of DNase or RNAse treatment	E	Line 162 (Reference Mauffrey)
Contamination assessment (DNA or RNA)	E	Lines 165-166
Nucleic acid quantification	E	Line 163
Instrument and method	E	Line 163
Purity (A260/A280)	D	Line 164
Yield	D
RNA integrity method/instrument	E	Line 163
RIN/RQI or Cq of 3' and 5' transcripts	E	not applicable
Electrophoresis traces	D
Inhibition testing (Cq dilutions, spike or other)	E	Line 188
REVERSE TRANSCRIPTION
Complete reaction conditions	E	Lines 162-168
Amount of RNA and reaction volume	E	Line 167
Priming oligonucleotide (if using GSP) and concentration	E	Line 167
Reverse transcriptase and concentration	E	Line 166
Temperature and time	E	Line 166
Manufacturer of reagents and catalogue numbers	D
Cqs with and without RT	D*
Storage conditions of cDNA	D	Line 168
qPCR TARGET INFORMATION
If multiplex, efficiency and LOD of each assay.	E	not applicable
Sequence accession number	E	Lines 173-180
Location of amplicon	D
Amplicon length	E	Table 2
In silico specificity screen (BLAST, etc)	E	Line 177
Pseudogenes, retropseudogenes or other homologs?	D
Sequence alignment	D
Secondary structure analysis of amplicon	D
Location of each primer by exon or intron (if applicable)	E	not applicable
What splice variants are targeted?	E	not applicable
qPCR OLIGONUCLEOTIDES
Primer sequences	E	Table 2
RTPrimerDB Identification Number	D
Probe sequences	D**
Location and identity of any modifications	E	not applicable
Manufacturer of oligonucleotides	D
Purification method	D
qPCR PROTOCOL
Complete reaction conditions	E	Lines 169-173
Reaction volume and amount of cDNA/DNA	E	Line 171
Primer, (probe), Mg++ and dNTP concentrations	E	Line 170
Polymerase identity and concentration	E	Line 170
Buffer/kit identity and manufacturer	E	Line 170
Exact chemical constitution of the buffer	D
Additives (SYBR Green I, DMSO, etc.)	E	Line 170
Manufacturer of plates/tubes and catalog number	D
Complete thermocycling parameters	E	Line 180
Reaction setup (manual/robotic)	D
Manufacturer of qPCR instrument	E	Line 170
qPCR VALIDATION
Evidence of optimisation (from gradients)	D
Specificity (gel, sequence, melt, or digest)	E	Line 182
For SYBR Green I, Cq of the NTC	E	Line 187
Standard curves with slope and y-intercept	E	Lines 183-187
PCR efficiency calculated from slope	E	Line 186
Confidence interval for PCR efficiency or standard error	D
r2 of standard curve	E	Line 186
Linear dynamic range	E	Lines 185-187
Cq variation at lower limit	E	Line 187
Confidence intervals throughout range	D
Evidence for limit of detection	E	Line 187
If multiplex, efficiency and LOD of each assay.	E	not applicable
DATA ANALYSIS
qPCR analysis program (source, version)	E	Line 186
Cq method determination	E	Line 186
Outlier identification and disposition	E	Line 236
Results of NTCs	E	Line 187
Justification of number and choice of reference genes	E	Line 177 (reference Rocha)
Description of normalisation method	E	Line 191
Number and concordance of biological replicates	D
Number and stage (RT or qPCR) of technical replicates	E	Lines 189-190
Repeatability (intra-assay variation)	E	standard deviation: Figure 1 data.xlsx
Reproducibility (inter-assay variation, %CV)	D
Power analysis	D
Statistical methods for result significance	E	Line 235-236
Software (source, version)	E	Line 236
Cq or raw data submission using RDML	D
Table 1. MIQE checklist for authors, reviewers and editors. All essential information (E) must be submitted with the manuscript. Desirable
information (D) should be submitted if available. If using primers obtained from RTPrimerDB, information on qPCR target, oligonucleotides,
protocols and validation is available from that source.
*: Assessing the absence of DNA using a no RT assay is essential when first extracting RNA. Once the sample has been validated as
RDNA-free, inclusion of a no-RT control is desirable, but no longer essential.
**: Disclosure of the probe sequence is highly desirable and strongly encouraged. However, since not all commercial pre-designed assay
vendors provide this information, it cannot be an essential requirement. Use of such assays is advised against.
